# Supplementary material
Source: publisher figshare collection journal article supplement (https://gsajournals.figshare.com/ndownloader/files/25587830)
Supplement: Supplementary file 1 [file 25587830]

## Sheet: Sheet1
Batch	X	Original.Name	Random.Name	quality	n	nMLH1.foci	REDO.crop	XY.paired	achiasmate	asynased	fileName	mouse	category	strain	sex	subsp	species	unique.key
Batch11		3jul18_8jun18_AST_m1_sp1_13.2_rev.tif	6134-23264-11698.tif	1	20	24	no	yes	1	0	3jul18_8jun18_AST_m1_sp1_13.2_rev.tif	8jun18_AST_m1	AST male	AST	male	Musc	M.musculus	3jul18_8jun18_AST_m1_sp1_13.2_rev.tif_Batch11
Batch11		3jul18_8jun18_AST_m1_sp1_16_rev.tif	31927-22560-21284.tif	1	20	25	no	yes	1	0	3jul18_8jun18_AST_m1_sp1_16_rev.tif	8jun18_AST_m1	AST male	AST	male	Musc	M.musculus	3jul18_8jun18_AST_m1_sp1_16_rev.tif_Batch11
Batch11		3jul18_8jun18_AST_m1_sp1_11_rev.tif	11683-32645-12720.tif	1	20	26	no	yes	0	0	3jul18_8jun18_AST_m1_sp1_11_rev.tif	8jun18_AST_m1	AST male	AST	male	Musc	M.musculus	3jul18_8jun18_AST_m1_sp1_11_rev.tif_Batch11
Batch11		3jul18_8jun18_AST_m1_sp1_8_rev.tif	20087-6847-5408.tif	1	20	29	no	yes	0	0	3jul18_8jun18_AST_m1_sp1_8_rev.tif	8jun18_AST_m1	AST male	AST	male	Musc	M.musculus	3jul18_8jun18_AST_m1_sp1_8_rev.tif_Batch11
Batch11		3jul18_8jun18_AST_m1_sp1_15.2_rev.tif	11822-24145-5236.tif	1	20	30	no	yes	0	0	3jul18_8jun18_AST_m1_sp1_15.2_rev.tif	8jun18_AST_m1	AST male	AST	male	Musc	M.musculus	3jul18_8jun18_AST_m1_sp1_15.2_rev.tif_Batch11
Batch16		16aug19_27aug18_AST_m1_sp1_7_rev.tif	6243-7737-6277.tif	1	20	29	no	yes	1	0	16aug19_27aug18_AST_m1_sp1_7_rev.tif	27aug18_AST_m1	AST male	AST	male	Musc	M.musculus	16aug19_27aug18_AST_m1_sp1_7_rev.tif_Batch16
Batch16		16aug19_27aug18_AST_m1_sp1_6_rev.tif	3826-12-16188.tif	1	20	27	no	yes	0	0	16aug19_27aug18_AST_m1_sp1_6_rev.tif	27aug18_AST_m1	AST male	AST	male	Musc	M.musculus	16aug19_27aug18_AST_m1_sp1_6_rev.tif_Batch16
Batch11		31aug18_1mar18_CAROLI_m1_sp3_12_rev.tif	1767-4306-3023.tif	1	20	22	no	yes	0	0	31aug18_1mar18_CAROLI_m1_sp3_12_rev.tif	1mar18_CAROLI_m1	CAROLI male	CAROLI	male	M.caroli	M.caroli	31aug18_1mar18_CAROLI_m1_sp3_12_rev.tif_Batch11
Batch11		31aug18_1mar18_CAROLI_m1_sp3_16.1_rev.tif	31936-22853-28119.tif	1	20	27	no	yes	0	0	31aug18_1mar18_CAROLI_m1_sp3_16.1_rev.tif	1mar18_CAROLI_m1	CAROLI male	CAROLI	male	M.caroli	M.caroli	31aug18_1mar18_CAROLI_m1_sp3_16.1_rev.tif_Batch11
Batch11		31aug18_1mar18_CAROLI_m1_sp3_14_rev.tif	15244-18788-2852.tif	1	20	28	no	yes	1	0	31aug18_1mar18_CAROLI_m1_sp3_14_rev.tif	1mar18_CAROLI_m1	CAROLI male	CAROLI	male	M.caroli	M.caroli	31aug18_1mar18_CAROLI_m1_sp3_14_rev.tif_Batch11
Batch11		31aug18_1mar18_CAROLI_m1_sp3_6.2_rev.tif	32732-11906-12108.tif	1	20	28	no	yes	0	0	31aug18_1mar18_CAROLI_m1_sp3_6.2_rev.tif	1mar18_CAROLI_m1	CAROLI male	CAROLI	male	M.caroli	M.caroli	31aug18_1mar18_CAROLI_m1_sp3_6.2_rev.tif_Batch11
Batch11		31aug18_1mar18_CAROLI_m1_sp3_11_rev.tif	132-26231-29210.tif	1	20	30	no	yes	0	0	31aug18_1mar18_CAROLI_m1_sp3_11_rev.tif	1mar18_CAROLI_m1	CAROLI male	CAROLI	male	M.caroli	M.caroli	31aug18_1mar18_CAROLI_m1_sp3_11_rev.tif_Batch11
Batch11		31aug18_1mar18_CAROLI_m1_sp3_26.1_rev.tif	13277-19078-9200.tif	1	20	30	no	no	0	0	31aug18_1mar18_CAROLI_m1_sp3_26.1_rev.tif	1mar18_CAROLI_m1	CAROLI male	CAROLI	male	M.caroli	M.caroli	31aug18_1mar18_CAROLI_m1_sp3_26.1_rev.tif_Batch11
Batch11		31aug18_1mar18_CAROLI_m1_sp3_27_rev.tif	26739-8861-23427.tif	1	20	30	no	yes	0	0	31aug18_1mar18_CAROLI_m1_sp3_27_rev.tif	1mar18_CAROLI_m1	CAROLI male	CAROLI	male	M.caroli	M.caroli	31aug18_1mar18_CAROLI_m1_sp3_27_rev.tif_Batch11
Batch11		31aug18_1mar18_CAROLI_m1_sp3_8_rev.tif	16700-1252-11027.tif	1	20	31	no	yes	0	0	31aug18_1mar18_CAROLI_m1_sp3_8_rev.tif	1mar18_CAROLI_m1	CAROLI male	CAROLI	male	M.caroli	M.caroli	31aug18_1mar18_CAROLI_m1_sp3_8_rev.tif_Batch11
Batch11		31aug18_1mar18_CAROLI_m1_sp3_2.2_rev.tif	8996-9101-17239.tif	1	20	31	no	yes	0	0	31aug18_1mar18_CAROLI_m1_sp3_2.2_rev.tif	1mar18_CAROLI_m1	CAROLI male	CAROLI	male	M.caroli	M.caroli	31aug18_1mar18_CAROLI_m1_sp3_2.2_rev.tif_Batch11
Batch18		12sep19_9apr18_CAROLI_m1_sp2_26.1_rev.tif	5943-16472-9299.tif	1	20	26	no	yes	0	0	12sep19_9apr18_CAROLI_m1_sp2_26.1_rev.tif	9apr18_CAROLI_m1	CAROLI male	CAROLI	male	M.caroli	M.caroli	12sep19_9apr18_CAROLI_m1_sp2_26.1_rev.tif_Batch18
Batch1		14oct16_30jun16_CAST_m3_sp1_11.1_rev.tif	16306-30757-22828.tif	1	20	22	no	yes	0	0	14oct16_30jun16_CAST_m3_sp1_11.1_rev.tif	30jun16_CAST_m3	CAST male	CAST	male	Cast	M.musculus	14oct16_30jun16_CAST_m3_sp1_11.1_rev.tif_Batch1
Batch1		14oct16_30jun16_CAST_m3_sp1_13_rev.tif	9498-11874-21287.tif	1	20	21	no	y	0	0	14oct16_30jun16_CAST_m3_sp1_13_rev.tif	30jun16_CAST_m3	CAST male	CAST	male	Cast	M.musculus	14oct16_30jun16_CAST_m3_sp1_13_rev.tif_Batch1
Batch1		14oct16_30jun16_CAST_m3_sp1_15_rev.tif	32260-5820-9771.tif	1	20	21	no	y	0	0	14oct16_30jun16_CAST_m3_sp1_15_rev.tif	30jun16_CAST_m3	CAST male	CAST	male	Cast	M.musculus	14oct16_30jun16_CAST_m3_sp1_15_rev.tif_Batch1
Batch1		14oct16_30jun16_CAST_m3_sp1_21_rev.tif	26999-4421-8043.tif	1	20	24	no	y	1	0	14oct16_30jun16_CAST_m3_sp1_21_rev.tif	30jun16_CAST_m3	CAST male	CAST	male	Cast	M.musculus	14oct16_30jun16_CAST_m3_sp1_21_rev.tif_Batch1
Batch1		14oct16_30jun16_CAST_m3_sp1_3.2_rev.tif	16218-13745-30166.tif	1	20	23	no	yes	0	0	14oct16_30jun16_CAST_m3_sp1_3.2_rev.tif	30jun16_CAST_m3	CAST male	CAST	male	Cast	M.musculus	14oct16_30jun16_CAST_m3_sp1_3.2_rev.tif_Batch1
Batch1		14oct16_30jun16_CAST_m3_sp1_6.1_rev.tif	2281-2142-5759.tif	1	20	22	no	no	1	0	14oct16_30jun16_CAST_m3_sp1_6.1_rev.tif	30jun16_CAST_m3	CAST male	CAST	male	Cast	M.musculus	14oct16_30jun16_CAST_m3_sp1_6.1_rev.tif_Batch1
Batch1		14oct16_30jun16_CAST_m3_sp1_8_rev.tif	20771-31400-2026.tif	1	20	23	no	yes	0	0	14oct16_30jun16_CAST_m3_sp1_8_rev.tif	30jun16_CAST_m3	CAST male	CAST	male	Cast	M.musculus	14oct16_30jun16_CAST_m3_sp1_8_rev.tif_Batch1
Batch1		14oct16_30jun16_CAST_m3_sp1_9_rev.tif	24744-15122-2903.tif	1	20	26	no	y	0	0	14oct16_30jun16_CAST_m3_sp1_9_rev.tif	30jun16_CAST_m3	CAST male	CAST	male	Cast	M.musculus	14oct16_30jun16_CAST_m3_sp1_9_rev.tif_Batch1
Batch1		1oct16_30jun16_CAST_m3_sp1_1_rev.tif	24161-14478-4799.tif	1	20	26	no	yes	0	0	1oct16_30jun16_CAST_m3_sp1_1_rev.tif	30jun16_CAST_m3	CAST male	CAST	male	Cast	M.musculus	1oct16_30jun16_CAST_m3_sp1_1_rev.tif_Batch1
Batch1		1oct16_30jun16_CAST_m3_sp1_3_rev.tif	7449-19867-8282.tif	1	20	22	no	y	0	0	1oct16_30jun16_CAST_m3_sp1_3_rev.tif	30jun16_CAST_m3	CAST male	CAST	male	Cast	M.musculus	1oct16_30jun16_CAST_m3_sp1_3_rev.tif_Batch1
Batch1		9sep16_30jun16_CAST_m1_sp1_5_rev.tif	30403-21984-424.tif	1	20	22	no	y	0	0	9sep16_30jun16_CAST_m1_sp1_5_rev.tif	30jun16_CAST_m1	CAST male	CAST	male	Cast	M.musculus	9sep16_30jun16_CAST_m1_sp1_5_rev.tif_Batch1
Batch1		14oct16_30jun16_CAST_m3_sp1_11.2_rev.tif	24613-12671-7507.tif	1	20	20	y	y	1	0	14oct16_30jun16_CAST_m3_sp1_11.2_rev.tif	30jun16_CAST_m3	CAST male	CAST	male	Cast	M.musculus	14oct16_30jun16_CAST_m3_sp1_11.2_rev.tif_Batch1
Batch1		14oct16_30jun16_CAST_m3_sp1_12_rev.tif	25757-8818-25562.tif	1	20	23	y	y	0	0	14oct16_30jun16_CAST_m3_sp1_12_rev.tif	30jun16_CAST_m3	CAST male	CAST	male	Cast	M.musculus	14oct16_30jun16_CAST_m3_sp1_12_rev.tif_Batch1
Batch16		25jul19_28sep18_CZECH_m3_sp1_9.1_rev.tif	15692-18920-15500.tif	1	20	23	no	yes	0	0	25jul19_28sep18_CZECH_m3_sp1_9.1_rev.tif	28sep18_CZECH_m3	CZECH male	CZECH	male	Musc	M.musculus	25jul19_28sep18_CZECH_m3_sp1_9.1_rev.tif_Batch16
Batch16		25jul19_28sep18_CZECH_m3_sp1_14_rev.tif	26682-6999-10693.tif	1	20	23	no	yes	0	0	25jul19_28sep18_CZECH_m3_sp1_14_rev.tif	28sep18_CZECH_m3	CZECH male	CZECH	male	Musc	M.musculus	25jul19_28sep18_CZECH_m3_sp1_14_rev.tif_Batch16
Batch16		12oct18_26sep18_CZECH_m1_sp1_9.2_rev.tif	5931-1160-5902.tif	1	20	25	no	yes	0	0	12oct18_26sep18_CZECH_m1_sp1_9.2_rev.tif	26sep18_CZECH_m1	CZECH male	CZECH	male	Musc	M.musculus	12oct18_26sep18_CZECH_m1_sp1_9.2_rev.tif_Batch16
Batch0		15mar16_16jan16_G_f1_sp1_8_rev.tif	8504-14914-26626.tif	1	20	28	no	na	0	0	15mar16_16jan16_G_f1_sp1_8_rev.tif	16jan16_G_f1	G female	G	female	Dom	M.musculus	15mar16_16jan16_G_f1_sp1_8_rev.tif_Batch0
Batch0		15mar16_16jan16_G_f1_sp1_9_rev.tif	6239-11741-16211.tif	1	20	29	no	na	0	0	15mar16_16jan16_G_f1_sp1_9_rev.tif	16jan16_G_f1	G female	G	female	Dom	M.musculus	15mar16_16jan16_G_f1_sp1_9_rev.tif_Batch0
Batch0		15mar16_16jan16_G_f2_sp1_17_rev.tif	1042-15774-24596.tif	1	20	29	no	na	0	0	15mar16_16jan16_G_f2_sp1_17_rev.tif	16jan16_G_f2	G female	G	female	Dom	M.musculus	15mar16_16jan16_G_f2_sp1_17_rev.tif_Batch0
Batch0		15mar16_16jan16_G_f2_sp1_23_rev.tif	24025-12067-29114.tif	1	20	36	no	na	0	0	15mar16_16jan16_G_f2_sp1_23_rev.tif	16jan16_G_f2	G female	G	female	Dom	M.musculus	15mar16_16jan16_G_f2_sp1_23_rev.tif_Batch0
Batch0		15mar16_16jan16_G_f2_sp1_27_rev.tif	26051-11491-10284.tif	1	20	24	no	na	0	0	15mar16_16jan16_G_f2_sp1_27_rev.tif	16jan16_G_f2	G female	G	female	Dom	M.musculus	15mar16_16jan16_G_f2_sp1_27_rev.tif_Batch0
Batch0		15mar16_16jan16_G_f2_sp1_3_rev.tif	3701-23541-4923.tif	1	20	27	no	na	0	0	15mar16_16jan16_G_f2_sp1_3_rev.tif	16jan16_G_f2	G female	G	female	Dom	M.musculus	15mar16_16jan16_G_f2_sp1_3_rev.tif_Batch0
Batch0		15mar16_16jan16_G_f2_sp1_5_rev.tif	6369-24986-21234.tif	1	20	30	no	na	0	0	15mar16_16jan16_G_f2_sp1_5_rev.tif	16jan16_G_f2	G female	G	female	Dom	M.musculus	15mar16_16jan16_G_f2_sp1_5_rev.tif_Batch0
Batch0		15mar16_16jan16_G_f2_sp1_8_rev.tif	23263-17539-10223.tif	1	20	26	no	na	0	0	15mar16_16jan16_G_f2_sp1_8_rev.tif	16jan16_G_f2	G female	G	female	Dom	M.musculus	15mar16_16jan16_G_f2_sp1_8_rev.tif_Batch0
Batch0		4apr16_17mar16_G_f3_sp1_1_rev.tif	15197-18396-28572.tif	1	20	27	no	no	0	0	4apr16_17mar16_G_f3_sp1_1_rev.tif	17mar16_G_f3	G female	G	female	Dom	M.musculus	4apr16_17mar16_G_f3_sp1_1_rev.tif_Batch0
Batch0		4apr16_17mar16_G_f3_sp1_2_rev.tif	30810-21446-12248.tif	1	20	29	no	na	0	0	4apr16_17mar16_G_f3_sp1_2_rev.tif	17mar16_G_f3	G female	G	female	Dom	M.musculus	4apr16_17mar16_G_f3_sp1_2_rev.tif_Batch0
Batch0		4apr16_17mar16_G_f3_sp1_20_rev.tif	8913-4934-18263.tif	1	20	32	n	na	0	0	4apr16_17mar16_G_f3_sp1_20_rev.tif	17mar16_G_f3	G female	G	female	Dom	M.musculus	4apr16_17mar16_G_f3_sp1_20_rev.tif_Batch0
Batch0		4apr16_17mar16_G_f3_sp1_26_rev.tif	31953-22087-17606.tif	1	20	32	no	na	0	0	4apr16_17mar16_G_f3_sp1_26_rev.tif	17mar16_G_f3	G female	G	female	Dom	M.musculus	4apr16_17mar16_G_f3_sp1_26_rev.tif_Batch0
Batch0		4apr16_17mar16_G_f3_sp1_28_rev.tif	14291-21887-16564.tif	1	20	32	no	na	0	0	4apr16_17mar16_G_f3_sp1_28_rev.tif	17mar16_G_f3	G female	G	female	Dom	M.musculus	4apr16_17mar16_G_f3_sp1_28_rev.tif_Batch0
Batch0		4apr16_17mar16_G_f3_sp1_3_rev.tif	14862-10265-22548.tif	1	20	25	no	na	0	0	4apr16_17mar16_G_f3_sp1_3_rev.tif	17mar16_G_f3	G female	G	female	Dom	M.musculus	4apr16_17mar16_G_f3_sp1_3_rev.tif_Batch0
Batch0		4apr16_17mar16_G_f3_sp1_5_rev.tif	15204-31627-8079.tif	1	20	29	no	na	0	0	4apr16_17mar16_G_f3_sp1_5_rev.tif	17mar16_G_f3	G female	G	female	Dom	M.musculus	4apr16_17mar16_G_f3_sp1_5_rev.tif_Batch0
Batch0		4apr16_17mar16_G_f4_sp1_22_rev.tif	31087-3320-495.tif	1	20	32	no	na	0	0	4apr16_17mar16_G_f4_sp1_22_rev.tif	17mar16_G_f4	G female	G	female	Dom	M.musculus	4apr16_17mar16_G_f4_sp1_22_rev.tif_Batch0
Batch0		4apr16_17mar16_G_f4_sp1_28_rev.tif	8309-19004-9550.tif	1	20	33	no	na	0	0	4apr16_17mar16_G_f4_sp1_28_rev.tif	17mar16_G_f4	G female	G	female	Dom	M.musculus	4apr16_17mar16_G_f4_sp1_28_rev.tif_Batch0
Batch0		27mar16_17mar16_G_f5_sp1_4_rev.tif	1038-29185-12184.tif	1	20	27	no	na	0	0	27mar16_17mar16_G_f5_sp1_4_rev.tif	17mar16_G_f5	G female	G	female	Dom	M.musculus	27mar16_17mar16_G_f5_sp1_4_rev.tif_Batch0
Batch0		27mar16_17mar16_G_f5_sp1_8_rev.tif	1649-8508-18504.tif	1	20	30	na	na	0	0	27mar16_17mar16_G_f5_sp1_8_rev.tif	17mar16_G_f5	G female	G	female	Dom	M.musculus	27mar16_17mar16_G_f5_sp1_8_rev.tif_Batch0
Batch0		1mar16_20feb16_G_f3_sp1_10_rev.tif	24286-29431-24989.tif	1	20	26	no	na	0	0	1mar16_20feb16_G_f3_sp1_10_rev.tif	20feb16_G_f3	G female	G	female	Dom	M.musculus	1mar16_20feb16_G_f3_sp1_10_rev.tif_Batch0
Batch0		1mar16_20feb16_G_f3_sp1_23_rev.tif	6221-31047-5299.tif	1	20	29	no	na	0	0	1mar16_20feb16_G_f3_sp1_23_rev.tif	20feb16_G_f3	G female	G	female	Dom	M.musculus	1mar16_20feb16_G_f3_sp1_23_rev.tif_Batch0
Batch0		1mar16_20feb16_G_f3_sp1_26_rev.tif	26220-7473-11658.tif	1	20	37	no	na	0	0	1mar16_20feb16_G_f3_sp1_26_rev.tif	20feb16_G_f3	G female	G	female	Dom	M.musculus	1mar16_20feb16_G_f3_sp1_26_rev.tif_Batch0
Batch0		1mar16_20feb16_G_f3_sp1_30_rev.tif	28591-20325-20149.tif	1	20	24	no	na	0	0	1mar16_20feb16_G_f3_sp1_30_rev.tif	20feb16_G_f3	G female	G	female	Dom	M.musculus	1mar16_20feb16_G_f3_sp1_30_rev.tif_Batch0
Batch0		1mar16_20feb16_G_f3_sp1_5_rev.tif	11575-19505-17138.tif	1	20	30	no	na	0	0	1mar16_20feb16_G_f3_sp1_5_rev.tif	20feb16_G_f3	G female	G	female	Dom	M.musculus	1mar16_20feb16_G_f3_sp1_5_rev.tif_Batch0
Batch0		27mar16_17mar16_G_f1_sp1_17_rev.tif	17733-32423-1932.tif	1	20	25	no	na	2	0	27mar16_17mar16_G_f1_sp1_17_rev.tif	17mar16_G_f1	G female	G	female	Dom	M.musculus	27mar16_17mar16_G_f1_sp1_17_rev.tif_Batch0
Batch0		4apr16_17mar16_G_f3_sp1_38_rev.tif	18192-3104-18451.tif	1	20	28	no	na	2	0	4apr16_17mar16_G_f3_sp1_38_rev.tif	17mar16_G_f3	G female	G	female	Dom	M.musculus	4apr16_17mar16_G_f3_sp1_38_rev.tif_Batch0
Batch2		21nov16_16jan16_G_f2_sp1_19_rev.tif	10894-24829-32475.tif	1	20	38	no		0	0	21nov16_16jan16_G_f2_sp1_19_rev.tif	16jan16_G_f2	G female	G	female	Dom	M.musculus	21nov16_16jan16_G_f2_sp1_19_rev.tif_Batch2
Batch2		21nov16_16jan16_G_f2_sp1_5_rev.tif	11943-17557-31290.tif	1	20	31	no		0	0	21nov16_16jan16_G_f2_sp1_5_rev.tif	16jan16_G_f2	G female	G	female	Dom	M.musculus	21nov16_16jan16_G_f2_sp1_5_rev.tif_Batch2
Batch2		21nov16_16jan16_G_f2_sp1_6_rev.tif	13038-31770-1581.tif	1	20	30	no		2	0	21nov16_16jan16_G_f2_sp1_6_rev.tif	16jan16_G_f2	G female	G	female	Dom	M.musculus	21nov16_16jan16_G_f2_sp1_6_rev.tif_Batch2
Batch2		27mar16_17mar16_G_f1_sp1_15_rev.tif	13592-32448-28060.tif	1	20	30	no		1	0	27mar16_17mar16_G_f1_sp1_15_rev.tif	17mar16_G_f1	G female	G	female	Dom	M.musculus	27mar16_17mar16_G_f1_sp1_15_rev.tif_Batch2
Batch2		21nov16_16jan16_G_f2_sp1_24_rev.tif	14015-23591-15082.tif	1	20	24	no		1	0	21nov16_16jan16_G_f2_sp1_24_rev.tif	16jan16_G_f2	G female	G	female	Dom	M.musculus	21nov16_16jan16_G_f2_sp1_24_rev.tif_Batch2
Batch2		21nov16_16jan16_G_f2_sp1_20_rev.tif	14573-2595-10477.tif	1	20	29	no		0	0	21nov16_16jan16_G_f2_sp1_20_rev.tif	16jan16_G_f2	G female	G	female	Dom	M.musculus	21nov16_16jan16_G_f2_sp1_20_rev.tif_Batch2
Batch2		21nov16_16jan16_G_f2_sp1_17_rev.tif	16404-30924-30576.tif	1	20	25	no		0	0	21nov16_16jan16_G_f2_sp1_17_rev.tif	16jan16_G_f2	G female	G	female	Dom	M.musculus	21nov16_16jan16_G_f2_sp1_17_rev.tif_Batch2
Batch2		17nov16_17mar16_G_f1_sp1_19_rev.tif	17022-9637-14153.tif	1	20	30	no		0	0	17nov16_17mar16_G_f1_sp1_19_rev.tif	17mar16_G_f1	G female	G	female	Dom	M.musculus	17nov16_17mar16_G_f1_sp1_19_rev.tif_Batch2
Batch2		21nov16_16jan16_G_f2_sp1_3_rev.tif	30934-31033-22620.tif	1	20	32	no		0	0	21nov16_16jan16_G_f2_sp1_3_rev.tif	16jan16_G_f2	G female	G	female	Dom	M.musculus	21nov16_16jan16_G_f2_sp1_3_rev.tif_Batch2
Batch2		17nov16_17mar16_G_f1_sp1_7_rev.tif	3154-24934-14995.tif	1	20	30	no		0	0	17nov16_17mar16_G_f1_sp1_7_rev.tif	17mar16_G_f1	G female	G	female	Dom	M.musculus	17nov16_17mar16_G_f1_sp1_7_rev.tif_Batch2
Batch2		17nov16_17mar16_G_f1_sp1_16_rev.tif	25926-2234-20835.tif	1	20	33	no		0	1	17nov16_17mar16_G_f1_sp1_16_rev.tif	17mar16_G_f1	G female	G	female	Dom	M.musculus	17nov16_17mar16_G_f1_sp1_16_rev.tif_Batch2
Batch2		17nov16_17mar16_G_f1_sp1_6_rev.tif	30698-27643-9581.tif	1	20	35	no		0	1	17nov16_17mar16_G_f1_sp1_6_rev.tif	17mar16_G_f1	G female	G	female	Dom	M.musculus	17nov16_17mar16_G_f1_sp1_6_rev.tif_Batch2
Batch2		17nov16_17mar16_G_f1_sp1_3.2_rev.tif	1033-15945-28661.tif	1	20	28	yes		0	0	17nov16_17mar16_G_f1_sp1_3.2_rev.tif	17mar16_G_f1	G female	G	female	Dom	M.musculus	17nov16_17mar16_G_f1_sp1_3.2_rev.tif_Batch2
Batch2		17nov16_17mar16_G_f1_sp1_31_rev.tif	14361-3297-30942.tif	1	20	25	yes		1	0	17nov16_17mar16_G_f1_sp1_31_rev.tif	17mar16_G_f1	G female	G	female	Dom	M.musculus	17nov16_17mar16_G_f1_sp1_31_rev.tif_Batch2
Batch4		15mar16_16jan16_G_f1_sp1_7_rev.tif	4648-32632-8597.tif	1	20	31			0	0	15mar16_16jan16_G_f1_sp1_7_rev.tif	16jan16_G_f1	G female	G	female	Dom	M.musculus	15mar16_16jan16_G_f1_sp1_7_rev.tif_Batch4
Batch4		16feb16_17mar16_G_f4_sp1_1_rev.tif	29387-14685-29676.tif	1	20	26			0	0	16feb16_17mar16_G_f4_sp1_1_rev.tif	17mar16_G_f4	G female	G	female	Dom	M.musculus	16feb16_17mar16_G_f4_sp1_1_rev.tif_Batch4
Batch4		16feb16_17mar16_G_f4_sp1_10_rev.tif	8862-26840-22229.tif	1	20	28			0	1	16feb16_17mar16_G_f4_sp1_10_rev.tif	17mar16_G_f4	G female	G	female	Dom	M.musculus	16feb16_17mar16_G_f4_sp1_10_rev.tif_Batch4
Batch4		16feb16_17mar16_G_f4_sp1_11_rev.tif	25420-12622-18694.tif	1	20	29			0	0	16feb16_17mar16_G_f4_sp1_11_rev.tif	17mar16_G_f4	G female	G	female	Dom	M.musculus	16feb16_17mar16_G_f4_sp1_11_rev.tif_Batch4
Batch4		16feb16_17mar16_G_f4_sp1_12_rev.tif	10455-20460-5317.tif	1	20	37			0	0	16feb16_17mar16_G_f4_sp1_12_rev.tif	17mar16_G_f4	G female	G	female	Dom	M.musculus	16feb16_17mar16_G_f4_sp1_12_rev.tif_Batch4
Batch4		16feb16_17mar16_G_f4_sp1_4_rev.tif	25498-707-13869.tif	1	20	27			0	1	16feb16_17mar16_G_f4_sp1_4_rev.tif	17mar16_G_f4	G female	G	female	Dom	M.musculus	16feb16_17mar16_G_f4_sp1_4_rev.tif_Batch4
Batch4		16feb16_17mar16_G_f4_sp1_9_rev.tif	30740-9882-32149.tif	1	20	29			0	0	16feb16_17mar16_G_f4_sp1_9_rev.tif	17mar16_G_f4	G female	G	female	Dom	M.musculus	16feb16_17mar16_G_f4_sp1_9_rev.tif_Batch4
Batch4		8feb17_17mar16_G_f5_sp1_4_rev.tif	30914-29623-16587.tif	1	20	28			1	0	8feb17_17mar16_G_f5_sp1_4_rev.tif	17mar16_G_f5	G female	G	female	Dom	M.musculus	8feb17_17mar16_G_f5_sp1_4_rev.tif_Batch4
Batch4		8feb17_17mar16_G_f5_sp1_6_rev.tif	10082-10685-10215.tif	1	20	27			0	1	8feb17_17mar16_G_f5_sp1_6_rev.tif	17mar16_G_f5	G female	G	female	Dom	M.musculus	8feb17_17mar16_G_f5_sp1_6_rev.tif_Batch4
Batch4		8feb17_17mar16_G_f5_sp1_7_rev.tif	28905-4567-10209.tif	1	20	28			0	0	8feb17_17mar16_G_f5_sp1_7_rev.tif	17mar16_G_f5	G female	G	female	Dom	M.musculus	8feb17_17mar16_G_f5_sp1_7_rev.tif_Batch4
Batch5		4apr16_17mar16_G_f4_sp1_3_rev.tif	20868-12131-31749.tif	1	20	24	no		0	0	4apr16_17mar16_G_f4_sp1_3_rev.tif	17mar16_G_f4	G female	G	female	Dom	M.musculus	4apr16_17mar16_G_f4_sp1_3_rev.tif_Batch5
Batch5		2jul17_17mar16_G_f4_sp1_3_rev.tif	11138-6977-17680.tif	1	20	26	no		0	0	2jul17_17mar16_G_f4_sp1_3_rev.tif	17mar16_G_f4	G female	G	female	Dom	M.musculus	2jul17_17mar16_G_f4_sp1_3_rev.tif_Batch5
Batch5		24may17_17mar16_G_f5_sp1_5_rev.tif	3238-21969-15455.tif	1	20	27	no		0	0	24may17_17mar16_G_f5_sp1_5_rev.tif	17mar16_G_f5	G female	G	female	Dom	M.musculus	24may17_17mar16_G_f5_sp1_5_rev.tif_Batch5
Batch5		4apr16_17mar16_G_f4_sp1_17_rev.tif	31299-25672-7836.tif	1	20	28	no		0	0	4apr16_17mar16_G_f4_sp1_17_rev.tif	17mar16_G_f4	G female	G	female	Dom	M.musculus	4apr16_17mar16_G_f4_sp1_17_rev.tif_Batch5
Batch5		4apr16_17mar16_G_f4_sp1_15_rev.tif	12223-29370-266.tif	1	20	29	no		0	0	4apr16_17mar16_G_f4_sp1_15_rev.tif	17mar16_G_f4	G female	G	female	Dom	M.musculus	4apr16_17mar16_G_f4_sp1_15_rev.tif_Batch5
Batch5		2jul17_17mar16_G_f4_sp1_5_rev.tif	22340-32401-23609.tif	1	20	29	no		0	0	2jul17_17mar16_G_f4_sp1_5_rev.tif	17mar16_G_f4	G female	G	female	Dom	M.musculus	2jul17_17mar16_G_f4_sp1_5_rev.tif_Batch5
Batch5		2jul17_17mar16_G_f4_sp1_13_rev.tif	32605-32221-13013.tif	1	20	29	no		0	0	2jul17_17mar16_G_f4_sp1_13_rev.tif	17mar16_G_f4	G female	G	female	Dom	M.musculus	2jul17_17mar16_G_f4_sp1_13_rev.tif_Batch5
Batch5		4apr16_17mar16_G_f4_sp1_30_rev.tif	4220-27418-31654.tif	1	20	29	no		0	0	4apr16_17mar16_G_f4_sp1_30_rev.tif	17mar16_G_f4	G female	G	female	Dom	M.musculus	4apr16_17mar16_G_f4_sp1_30_rev.tif_Batch5
Batch5		2jul17_17mar16_G_f4_sp1_11_rev.tif	5756-19926-24587.tif	1	20	32	no		0	1	2jul17_17mar16_G_f4_sp1_11_rev.tif	17mar16_G_f4	G female	G	female	Dom	M.musculus	2jul17_17mar16_G_f4_sp1_11_rev.tif_Batch5
Batch5		24may17_17mar16_G_f5_sp1_2_rev.tif	7160-15315-12600.tif	1	20	36	no		0	2	24may17_17mar16_G_f5_sp1_2_rev.tif	17mar16_G_f5	G female	G	female	Dom	M.musculus	24may17_17mar16_G_f5_sp1_2_rev.tif_Batch5
Batch5		4apr16_17mar16_G_f4_sp1_7_rev.tif	1483-32531-3671.tif	1	20	40	no		0	1	4apr16_17mar16_G_f4_sp1_7_rev.tif	17mar16_G_f4	G female	G	female	Dom	M.musculus	4apr16_17mar16_G_f4_sp1_7_rev.tif_Batch5
Batch5		24may17_17mar16_G_f5_sp1_18_rev.tif	23974-27794-13255.tif	1	20	30	no		0	0	24may17_17mar16_G_f5_sp1_18_rev.tif	17mar16_G_f5	G female	G	female	Dom	M.musculus	24may17_17mar16_G_f5_sp1_18_rev.tif_Batch5
Batch5		24may17_17mar16_G_f5_sp1_11_rev.tif	21544-7518-15415.tif	1	20	20	no		1	0	24may17_17mar16_G_f5_sp1_11_rev.tif	17mar16_G_f5	G female	G	female	Dom	M.musculus	24may17_17mar16_G_f5_sp1_11_rev.tif_Batch5
Batch5		24may17_17mar16_G_f5_sp1_8_rev.tif	26468-22645-6962.tif	1	20	21	no		1	0	24may17_17mar16_G_f5_sp1_8_rev.tif	17mar16_G_f5	G female	G	female	Dom	M.musculus	24may17_17mar16_G_f5_sp1_8_rev.tif_Batch5
Batch5		24may17_17mar16_G_f5_sp1_12_rev.tif	3884-27393-28632.tif	1	20	27	no		1	0	24may17_17mar16_G_f5_sp1_12_rev.tif	17mar16_G_f5	G female	G	female	Dom	M.musculus	24may17_17mar16_G_f5_sp1_12_rev.tif_Batch5
Batch5		24may17_17mar16_G_f5_sp1_4_rev.tif	15022-15915-11682.tif	1	20	29	no		1	0	24may17_17mar16_G_f5_sp1_4_rev.tif	17mar16_G_f5	G female	G	female	Dom	M.musculus	24may17_17mar16_G_f5_sp1_4_rev.tif_Batch5
Batch5		4apr16_17mar16_G_f4_sp1_14_rev.tif	7463-23535-6861.tif	1	20	33	no		1	0	4apr16_17mar16_G_f4_sp1_14_rev.tif	17mar16_G_f4	G female	G	female	Dom	M.musculus	4apr16_17mar16_G_f4_sp1_14_rev.tif_Batch5
Batch5		24may17_17mar16_G_f5_sp1_16_rev.tif	6646-10859-13565.tif	1	20	24	no		2	0	24may17_17mar16_G_f5_sp1_16_rev.tif	17mar16_G_f5	G female	G	female	Dom	M.musculus	24may17_17mar16_G_f5_sp1_16_rev.tif_Batch5
Batch14		31mar15_13oct14_G_f1_sp1_53.2_rev.tif	4314-21443-9886.tif	1	20	33	no		1	0	31mar15_13oct14_G_f1_sp1_53.2_rev.tif	13oct14_G_f1	G female	G	female	Dom	M.musculus	31mar15_13oct14_G_f1_sp1_53.2_rev.tif_Batch14
Batch14		31mar15_13oct14_G_f1_sp1_40_rev.tif	20171-25971-10597.tif	1	20	24	no		0	0	31mar15_13oct14_G_f1_sp1_40_rev.tif	13oct14_G_f1	G female	G	female	Dom	M.musculus	31mar15_13oct14_G_f1_sp1_40_rev.tif_Batch14
Batch14		31mar15_13oct14_G_f1_sp1_36.2_rev.tif	1842-11549-19981.tif	1	20	26	no		0	0	31mar15_13oct14_G_f1_sp1_36.2_rev.tif	13oct14_G_f1	G female	G	female	Dom	M.musculus	31mar15_13oct14_G_f1_sp1_36.2_rev.tif_Batch14
Batch14		31mar15_13oct14_G_f1_sp1_33_rev.tif	9015-26788-24304.tif	1	20	32	no		0	0	31mar15_13oct14_G_f1_sp1_33_rev.tif	13oct14_G_f1	G female	G	female	Dom	M.musculus	31mar15_13oct14_G_f1_sp1_33_rev.tif_Batch14
Batch14		31mar15_13oct14_G_f1_sp1_2_rev.tif	23396-30463-25982.tif	1	20	26	no		0	0	31mar15_13oct14_G_f1_sp1_2_rev.tif	13oct14_G_f1	G female	G	female	Dom	M.musculus	31mar15_13oct14_G_f1_sp1_2_rev.tif_Batch14
Batch14		30mar15_13oct14_G_f1_sp1_16_rev.tif	2630-6496-24482.tif	1	20	36	no		1	0	30mar15_13oct14_G_f1_sp1_16_rev.tif	13oct14_G_f1	G female	G	female	Dom	M.musculus	30mar15_13oct14_G_f1_sp1_16_rev.tif_Batch14
Batch14		30mar15_13oct14_G_f1_sp1_1.1_rev.tif	1634-30778-17785.tif	1	20	26	no		1	0	30mar15_13oct14_G_f1_sp1_1.1_rev.tif	13oct14_G_f1	G female	G	female	Dom	M.musculus	30mar15_13oct14_G_f1_sp1_1.1_rev.tif_Batch14
Batch14		27mar16_17mar16_G_f2_sp1_10_rev.tif	13794-8247-17375.tif	1	20	23	no		2	0	27mar16_17mar16_G_f2_sp1_10_rev.tif	17mar16_G_f2	G female	G	female	Dom	M.musculus	27mar16_17mar16_G_f2_sp1_10_rev.tif_Batch14
Batch17		2may16_20feb16_G_f1_sp1_11_rev.tif	4134-23972-12504.tif	1	20	29			0	0	2may16_20feb16_G_f1_sp1_11_rev.tif	20feb16_G_f1	G female	G	female	Dom	M.musculus	2may16_20feb16_G_f1_sp1_11_rev.tif_Batch17
Batch17		2may16_20feb16_G_f1_sp1_12_rev.tif	6750-12763-14056.tif	1	20	28			0	0	2may16_20feb16_G_f1_sp1_12_rev.tif	20feb16_G_f1	G female	G	female	Dom	M.musculus	2may16_20feb16_G_f1_sp1_12_rev.tif_Batch17
Batch17		2may16_20feb16_G_f1_sp1_15_rev.tif	14542-8504-13885.tif	1	20	28			0	0	2may16_20feb16_G_f1_sp1_15_rev.tif	20feb16_G_f1	G female	G	female	Dom	M.musculus	2may16_20feb16_G_f1_sp1_15_rev.tif_Batch17
Batch17		2may16_20feb16_G_f1_sp1_23_rev.tif	7111-6097-3711.tif	1	20	33			1	0	2may16_20feb16_G_f1_sp1_23_rev.tif	20feb16_G_f1	G female	G	female	Dom	M.musculus	2may16_20feb16_G_f1_sp1_23_rev.tif_Batch17
Batch17		2may16_20feb16_G_f1_sp1_24_rev.tif	29382-4847-6569.tif	1	20	35			0	0	2may16_20feb16_G_f1_sp1_24_rev.tif	20feb16_G_f1	G female	G	female	Dom	M.musculus	2may16_20feb16_G_f1_sp1_24_rev.tif_Batch17
Batch17		2may16_20feb16_G_f1_sp1_25_rev.tif	9545-25268-2689.tif	1	20	24			1	0	2may16_20feb16_G_f1_sp1_25_rev.tif	20feb16_G_f1	G female	G	female	Dom	M.musculus	2may16_20feb16_G_f1_sp1_25_rev.tif_Batch17
Batch17		2may16_20feb16_G_f1_sp1_26_rev.tif	12320-28829-16839.tif	1	20	29			0	0	2may16_20feb16_G_f1_sp1_26_rev.tif	20feb16_G_f1	G female	G	female	Dom	M.musculus	2may16_20feb16_G_f1_sp1_26_rev.tif_Batch17
Batch17		2may16_20feb16_G_f1_sp1_7.2_rev.tif	25264-28851-6648.tif	1	20	32			1	0	2may16_20feb16_G_f1_sp1_7.2_rev.tif	20feb16_G_f1	G female	G	female	Dom	M.musculus	2may16_20feb16_G_f1_sp1_7.2_rev.tif_Batch17
Batch17		2may16_20feb16_G_f1_sp1_8_rev.tif	28973-19375-20531.tif	1	20	28			0	0	2may16_20feb16_G_f1_sp1_8_rev.tif	20feb16_G_f1	G female	G	female	Dom	M.musculus	2may16_20feb16_G_f1_sp1_8_rev.tif_Batch17
Batch17		3sep19_20feb16_G_f2_sp1_15_rev.tif	24930-10873-9776.tif	1	20	29			0	0	3sep19_20feb16_G_f2_sp1_15_rev.tif	20feb16_G_f2	G female	G	female	Dom	M.musculus	3sep19_20feb16_G_f2_sp1_15_rev.tif_Batch17
Batch17		3sep19_20feb16_G_f2_sp1_16_rev.tif	3716-25041-9984.tif	1	20	32			0	1	3sep19_20feb16_G_f2_sp1_16_rev.tif	20feb16_G_f2	G female	G	female	Dom	M.musculus	3sep19_20feb16_G_f2_sp1_16_rev.tif_Batch17
Batch17		3sep19_20feb16_G_f2_sp1_18_rev.tif	11869-5880-5825.tif	1	20	25			1	0	3sep19_20feb16_G_f2_sp1_18_rev.tif	20feb16_G_f2	G female	G	female	Dom	M.musculus	3sep19_20feb16_G_f2_sp1_18_rev.tif_Batch17
Batch0		19oct15_12oct15_G_m1_sp1_11.1_rev.tif	8773-10999-19505.tif	1	20	25	no	yes	0	0	19oct15_12oct15_G_m1_sp1_11.1_rev.tif	12oct15_G_m1	G male	G	male	Dom	M.musculus	19oct15_12oct15_G_m1_sp1_11.1_rev.tif_Batch0
Batch0		19oct15_12oct15_G_m1_sp1_11.2_rev.tif	4933-26548-12182.tif	1	20	22	no	yes	0	0	19oct15_12oct15_G_m1_sp1_11.2_rev.tif	12oct15_G_m1	G male	G	male	Dom	M.musculus	19oct15_12oct15_G_m1_sp1_11.2_rev.tif_Batch0
Batch0		19oct15_12oct15_G_m1_sp1_13_rev.tif	16570-523-25292.tif	1	20	20	no	yes	0	0	19oct15_12oct15_G_m1_sp1_13_rev.tif	12oct15_G_m1	G male	G	male	Dom	M.musculus	19oct15_12oct15_G_m1_sp1_13_rev.tif_Batch0
Batch0		19oct15_12oct15_G_m1_sp1_15.1_rev.tif	23212-14551-7133.tif	1	20	22	no	yes	0	0	19oct15_12oct15_G_m1_sp1_15.1_rev.tif	12oct15_G_m1	G male	G	male	Dom	M.musculus	19oct15_12oct15_G_m1_sp1_15.1_rev.tif_Batch0
Batch0		19oct15_12oct15_G_m1_sp1_17.1_rev.tif	28727-9372-6078.tif	1	20	21	no	yes	0	0	19oct15_12oct15_G_m1_sp1_17.1_rev.tif	12oct15_G_m1	G male	G	male	Dom	M.musculus	19oct15_12oct15_G_m1_sp1_17.1_rev.tif_Batch0
Batch0		19oct15_12oct15_G_m1_sp1_17.2_rev.tif		1	20	24	no	yes	0	0	19oct15_12oct15_G_m1_sp1_17.2_rev.tif	12oct15_G_m1	G male	G	male	Dom	M.musculus	19oct15_12oct15_G_m1_sp1_17.2_rev.tif_Batch0
Batch0		19oct15_12oct15_G_m1_sp1_21.1_rev.tif	22738-13959-12943.tif	1	20	22	no	yes	0	0	19oct15_12oct15_G_m1_sp1_21.1_rev.tif	12oct15_G_m1	G male	G	male	Dom	M.musculus	19oct15_12oct15_G_m1_sp1_21.1_rev.tif_Batch0
Batch0		19oct15_12oct15_G_m1_sp1_21.2_rev.tif	16624-2194-10956.tif	1	20	23	no	yes	0	0	19oct15_12oct15_G_m1_sp1_21.2_rev.tif	12oct15_G_m1	G male	G	male	Dom	M.musculus	19oct15_12oct15_G_m1_sp1_21.2_rev.tif_Batch0
Batch0		19oct15_12oct15_G_m1_sp1_23_rev.tif	18419-10160-8668.tif	1	20	20	no	yes	0	0	19oct15_12oct15_G_m1_sp1_23_rev.tif	12oct15_G_m1	G male	G	male	Dom	M.musculus	19oct15_12oct15_G_m1_sp1_23_rev.tif_Batch0
Batch0		19oct15_12oct15_G_m1_sp1_24_rev.tif	28508-31298-18702.tif	1	20	23	no	yes	0	0	19oct15_12oct15_G_m1_sp1_24_rev.tif	12oct15_G_m1	G male	G	male	Dom	M.musculus	19oct15_12oct15_G_m1_sp1_24_rev.tif_Batch0
Batch0		19oct15_12oct15_G_m1_sp1_7_rev.tif	5443-7545-7268.tif	1	20	21	no	no	0	0	19oct15_12oct15_G_m1_sp1_7_rev.tif	12oct15_G_m1	G male	G	male	Dom	M.musculus	19oct15_12oct15_G_m1_sp1_7_rev.tif_Batch0
Batch0		19oct15_12oct15_G_m1_sp1_8_rev.tif	19693-6048-13838.tif	1	20	24	no	yes	0	0	19oct15_12oct15_G_m1_sp1_8_rev.tif	12oct15_G_m1	G male	G	male	Dom	M.musculus	19oct15_12oct15_G_m1_sp1_8_rev.tif_Batch0
Batch0		19oct15_12oct15_G_m1_sp1_9_rev.tif	25828-26869-24121.tif	1	20	23	no	yes	0	0	19oct15_12oct15_G_m1_sp1_9_rev.tif	12oct15_G_m1	G male	G	male	Dom	M.musculus	19oct15_12oct15_G_m1_sp1_9_rev.tif_Batch0
Batch0		27mar16_6mar16_G_m1_sp1_11_rev.tif	20511-14746-6098.tif	1	20	26	no	yes	0	0	27mar16_6mar16_G_m1_sp1_11_rev.tif	6mar16_G_m1	G male	G	male	Dom	M.musculus	27mar16_6mar16_G_m1_sp1_11_rev.tif_Batch0
Batch0		9mar16_22feb16_G_m1_sp1_1_rev.tif	22364-9942-3241.tif	1	20	26	no	yes	0	0	9mar16_22feb16_G_m1_sp1_1_rev.tif	22feb16_G_m1	G male	G	male	Dom	M.musculus	9mar16_22feb16_G_m1_sp1_1_rev.tif_Batch0
Batch0		9mar16_22feb16_G_m1_sp1_11_rev.tif	24308-19830-18195.tif	1	20	21	no	yes	0	0	9mar16_22feb16_G_m1_sp1_11_rev.tif	22feb16_G_m1	G male	G	male	Dom	M.musculus	9mar16_22feb16_G_m1_sp1_11_rev.tif_Batch0
Batch0		9mar16_22feb16_G_m1_sp1_13_rev.tif	7042-8172-12845.tif	1	20	30	no	yes	0	0	9mar16_22feb16_G_m1_sp1_13_rev.tif	22feb16_G_m1	G male	G	male	Dom	M.musculus	9mar16_22feb16_G_m1_sp1_13_rev.tif_Batch0
Batch0		9mar16_22feb16_G_m1_sp1_15.2_rev.tif	27892-622-28158.tif	1	20	27	no	yes	0	0	9mar16_22feb16_G_m1_sp1_15.2_rev.tif	22feb16_G_m1	G male	G	male	Dom	M.musculus	9mar16_22feb16_G_m1_sp1_15.2_rev.tif_Batch0
Batch0		9mar16_22feb16_G_m1_sp1_16_rev.tif	18696-14763-4525.tif	1	20	25	no	yes	0	0	9mar16_22feb16_G_m1_sp1_16_rev.tif	22feb16_G_m1	G male	G	male	Dom	M.musculus	9mar16_22feb16_G_m1_sp1_16_rev.tif_Batch0
Batch0		9mar16_22feb16_G_m1_sp1_18_rev.tif	3590-30718-4906.tif	1	20	22	no	yes	0	0	9mar16_22feb16_G_m1_sp1_18_rev.tif	22feb16_G_m1	G male	G	male	Dom	M.musculus	9mar16_22feb16_G_m1_sp1_18_rev.tif_Batch0
Batch0		9mar16_22feb16_G_m1_sp1_21.1_rev.tif	14966-11259-28867.tif	1	20	26	no	yes	0	0	9mar16_22feb16_G_m1_sp1_21.1_rev.tif	22feb16_G_m1	G male	G	male	Dom	M.musculus	9mar16_22feb16_G_m1_sp1_21.1_rev.tif_Batch0
Batch0		9mar16_22feb16_G_m1_sp1_22_rev.tif	4475-21101-18122.tif	1	20	23	no	yes	0	0	9mar16_22feb16_G_m1_sp1_22_rev.tif	22feb16_G_m1	G male	G	male	Dom	M.musculus	9mar16_22feb16_G_m1_sp1_22_rev.tif_Batch0
Batch0		9mar16_22feb16_G_m1_sp1_4_rev.tif	4688-23382-17413.tif	1	20	26	yes	yes	0	0	9mar16_22feb16_G_m1_sp1_4_rev.tif	22feb16_G_m1	G male	G	male	Dom	M.musculus	9mar16_22feb16_G_m1_sp1_4_rev.tif_Batch0
Batch0		9mar16_22feb16_G_m1_sp1_6_rev.tif	17041-22821-10302.tif	1	20	20	no	yes	0	0	9mar16_22feb16_G_m1_sp1_6_rev.tif	22feb16_G_m1	G male	G	male	Dom	M.musculus	9mar16_22feb16_G_m1_sp1_6_rev.tif_Batch0
Batch0		9mar16_22feb16_G_m1_sp1_7_rev.tif	20455-29125-31374.tif	1	20	27	no	yes	0	0	9mar16_22feb16_G_m1_sp1_7_rev.tif	22feb16_G_m1	G male	G	male	Dom	M.musculus	9mar16_22feb16_G_m1_sp1_7_rev.tif_Batch0
Batch0		9mar16_22feb16_G_m1_sp1_8_rev.tif	10809-15767-23310.tif	1	20	19	no	yes	0	0	9mar16_22feb16_G_m1_sp1_8_rev.tif	22feb16_G_m1	G male	G	male	Dom	M.musculus	9mar16_22feb16_G_m1_sp1_8_rev.tif_Batch0
Batch0		9mar16_22feb16_G_m1_sp1_9_rev.tif	32744-19914-21055.tif	1	20	27	no	yes	0	0	9mar16_22feb16_G_m1_sp1_9_rev.tif	22feb16_G_m1	G male	G	male	Dom	M.musculus	9mar16_22feb16_G_m1_sp1_9_rev.tif_Batch0
Batch0		20aug15_22jun15_G_m1_sp2_1.2_rev.tif	24809-18755-11043.tif	1	20	20	no	yes	0	0	20aug15_22jun15_G_m1_sp2_1.2_rev.tif	22jun15_G_m1	G male	G	male	Dom	M.musculus	20aug15_22jun15_G_m1_sp2_1.2_rev.tif_Batch0
Batch0		20aug15_22jun15_G_m1_sp2_2.2_rev.tif	30476-7765-31202.tif	1	20	23	no	yes	0	0	20aug15_22jun15_G_m1_sp2_2.2_rev.tif	22jun15_G_m1	G male	G	male	Dom	M.musculus	20aug15_22jun15_G_m1_sp2_2.2_rev.tif_Batch0
Batch0		27jul15_22jun15_G_m2_sp1_10.2_rev.tif	12543-26610-11782.tif	1	20	22	no	yes	0	0	27jul15_22jun15_G_m2_sp1_10.2_rev.tif	22jun15_G_m2	G male	G	male	Dom	M.musculus	27jul15_22jun15_G_m2_sp1_10.2_rev.tif_Batch0
Batch0		28jul15_22jun15_G_m2_sp1_16_rev.tif	9679-6016-9968.tif	1	20	20	no	yes	0	0	28jul15_22jun15_G_m2_sp1_16_rev.tif	22jun15_G_m2	G male	G	male	Dom	M.musculus	28jul15_22jun15_G_m2_sp1_16_rev.tif_Batch0
Batch0		28jul15_22jun15_G_m2_sp1_19_rev.tif	25070-2445-25472.tif	1	20	23	no	no	0	0	28jul15_22jun15_G_m2_sp1_19_rev.tif	22jun15_G_m2	G male	G	male	Dom	M.musculus	28jul15_22jun15_G_m2_sp1_19_rev.tif_Batch0
Batch0		28jul15_22jun15_G_m2_sp1_21.3_rev.tif	24306-7273-29673.tif	1	20	24	yes	yes	0	0	28jul15_22jun15_G_m2_sp1_21.3_rev.tif	22jun15_G_m2	G male	G	male	Dom	M.musculus	28jul15_22jun15_G_m2_sp1_21.3_rev.tif_Batch0
Batch0		28jul15_22jun15_G_m2_sp1_3_rev.tif	24733-5113-3688.tif	1	20	26	no	yes	0	0	28jul15_22jun15_G_m2_sp1_3_rev.tif	22jun15_G_m2	G male	G	male	Dom	M.musculus	28jul15_22jun15_G_m2_sp1_3_rev.tif_Batch0
Batch0		28jul15_22jun15_G_m2_sp1_4_rev.tif	6335-10047-25570.tif	1	20	26	no	yes	0	0	28jul15_22jun15_G_m2_sp1_4_rev.tif	22jun15_G_m2	G male	G	male	Dom	M.musculus	28jul15_22jun15_G_m2_sp1_4_rev.tif_Batch0
Batch0		28jul15_22jun15_G_m2_sp1_5_rev.tif	25472-14911-4777.tif	1	20	24	no	yes	0	0	28jul15_22jun15_G_m2_sp1_5_rev.tif	22jun15_G_m2	G male	G	male	Dom	M.musculus	28jul15_22jun15_G_m2_sp1_5_rev.tif_Batch0
Batch0		28jul15_22jun15_G_m2_sp1_8_rev.tif	30311-7312-220.tif	1	20	20	no	yes	0	0	28jul15_22jun15_G_m2_sp1_8_rev.tif	22jun15_G_m2	G male	G	male	Dom	M.musculus	28jul15_22jun15_G_m2_sp1_8_rev.tif_Batch0
Batch0		27jul15_22jun15_G_m2_sp1_8_rev.tif	26255-690-20837.tif	1	20	22	no	yes	0	0	27jul15_22jun15_G_m2_sp1_8_rev.tif	22jun15_G_m2	G male	G	male	Dom	M.musculus	27jul15_22jun15_G_m2_sp1_8_rev.tif_Batch0
Batch0		1mar16_3jan16_G_m1_sp1_1_rev.tif	5822-17255-23792.tif	1	20	20	no	yes	0	0	1mar16_3jan16_G_m1_sp1_1_rev.tif	3jan16_G_m1	G male	G	male	Dom	M.musculus	1mar16_3jan16_G_m1_sp1_1_rev.tif_Batch0
Batch0		1mar16_3jan16_G_m1_sp1_11_rev.tif	3378-24222-4401.tif	1	20	22	no	yes	0	0	1mar16_3jan16_G_m1_sp1_11_rev.tif	3jan16_G_m1	G male	G	male	Dom	M.musculus	1mar16_3jan16_G_m1_sp1_11_rev.tif_Batch0
Batch0		1mar16_3jan16_G_m1_sp1_12_rev.tif	27812-2483-18815.tif	1	20	24	no	yes	0	0	1mar16_3jan16_G_m1_sp1_12_rev.tif	3jan16_G_m1	G male	G	male	Dom	M.musculus	1mar16_3jan16_G_m1_sp1_12_rev.tif_Batch0
Batch0		1mar16_3jan16_G_m1_sp1_14_rev.tif	16066-21108-27360.tif	1	20	20	yes	yes	0	0	1mar16_3jan16_G_m1_sp1_14_rev.tif	3jan16_G_m1	G male	G	male	Dom	M.musculus	1mar16_3jan16_G_m1_sp1_14_rev.tif_Batch0
Batch0		1mar16_3jan16_G_m1_sp1_15_rev.tif	21441-15519-10681.tif	1	20	21	no	yes	0	0	1mar16_3jan16_G_m1_sp1_15_rev.tif	3jan16_G_m1	G male	G	male	Dom	M.musculus	1mar16_3jan16_G_m1_sp1_15_rev.tif_Batch0
Batch0		1mar16_3jan16_G_m1_sp1_16.1_rev.tif	29887-93-27745.tif	1	20	21	no	yes	0	0	1mar16_3jan16_G_m1_sp1_16.1_rev.tif	3jan16_G_m1	G male	G	male	Dom	M.musculus	1mar16_3jan16_G_m1_sp1_16.1_rev.tif_Batch0
Batch0		1mar16_3jan16_G_m1_sp1_18.1_rev.tif	28571-14435-12903.tif	1	20	24	no	yes	0	0	1mar16_3jan16_G_m1_sp1_18.1_rev.tif	3jan16_G_m1	G male	G	male	Dom	M.musculus	1mar16_3jan16_G_m1_sp1_18.1_rev.tif_Batch0
Batch0		1mar16_3jan16_G_m1_sp1_18.2_rev.tif	26869-12909-15822.tif	1	20	22	no	yes	0	0	1mar16_3jan16_G_m1_sp1_18.2_rev.tif	3jan16_G_m1	G male	G	male	Dom	M.musculus	1mar16_3jan16_G_m1_sp1_18.2_rev.tif_Batch0
Batch0		1mar16_3jan16_G_m1_sp1_2_rev.tif	11866-384-686.tif	1	20	24	yes	yes	0	0	1mar16_3jan16_G_m1_sp1_2_rev.tif	3jan16_G_m1	G male	G	male	Dom	M.musculus	1mar16_3jan16_G_m1_sp1_2_rev.tif_Batch0
Batch0		1mar16_3jan16_G_m1_sp1_20.1_rev.tif	8180-7548-12506.tif	1	20	22	no	yes	0	0	1mar16_3jan16_G_m1_sp1_20.1_rev.tif	3jan16_G_m1	G male	G	male	Dom	M.musculus	1mar16_3jan16_G_m1_sp1_20.1_rev.tif_Batch0
Batch0		1mar16_3jan16_G_m1_sp1_20.2_rev.tif	29652-4308-12407.tif	1	20	22	no	yes	0	0	1mar16_3jan16_G_m1_sp1_20.2_rev.tif	3jan16_G_m1	G male	G	male	Dom	M.musculus	1mar16_3jan16_G_m1_sp1_20.2_rev.tif_Batch0
Batch0		1mar16_3jan16_G_m1_sp1_22_rev.tif	4079-31414-14106.tif	1	20	22	no	yes	0	0	1mar16_3jan16_G_m1_sp1_22_rev.tif	3jan16_G_m1	G male	G	male	Dom	M.musculus	1mar16_3jan16_G_m1_sp1_22_rev.tif_Batch0
Batch0		1mar16_3jan16_G_m1_sp1_23_rev.tif	22258-22220-24009.tif	1	20	19	no	yes	0	0	1mar16_3jan16_G_m1_sp1_23_rev.tif	3jan16_G_m1	G male	G	male	Dom	M.musculus	1mar16_3jan16_G_m1_sp1_23_rev.tif_Batch0
Batch0		1mar16_3jan16_G_m1_sp1_24.1_rev.tif	1824-6757-5160.tif	1	20	20	no	yes	0	0	1mar16_3jan16_G_m1_sp1_24.1_rev.tif	3jan16_G_m1	G male	G	male	Dom	M.musculus	1mar16_3jan16_G_m1_sp1_24.1_rev.tif_Batch0
Batch0		1mar16_3jan16_G_m1_sp1_3.1_rev.tif	563-24997-13246.tif	1	20	20	yes	yes	0	0	1mar16_3jan16_G_m1_sp1_3.1_rev.tif	3jan16_G_m1	G male	G	male	Dom	M.musculus	1mar16_3jan16_G_m1_sp1_3.1_rev.tif_Batch0
Batch0		1mar16_3jan16_G_m1_sp1_5.2_rev.tif	3283-29031-6753.tif	1	20	22	no	yes	0	0	1mar16_3jan16_G_m1_sp1_5.2_rev.tif	3jan16_G_m1	G male	G	male	Dom	M.musculus	1mar16_3jan16_G_m1_sp1_5.2_rev.tif_Batch0
Batch0		1mar16_3jan16_G_m1_sp1_6_rev.tif	26821-31058-3439.tif	1	20	21	no	yes	0	0	1mar16_3jan16_G_m1_sp1_6_rev.tif	3jan16_G_m1	G male	G	male	Dom	M.musculus	1mar16_3jan16_G_m1_sp1_6_rev.tif_Batch0
Batch0		1mar16_3jan16_G_m1_sp1_7_rev.tif	5372-13078-31031.tif	1	20	22	no	yes	0	0	1mar16_3jan16_G_m1_sp1_7_rev.tif	3jan16_G_m1	G male	G	male	Dom	M.musculus	1mar16_3jan16_G_m1_sp1_7_rev.tif_Batch0
Batch0		1mar16_3jan16_G_m1_sp1_8.1_rev.tif	18804-9486-20666.tif	1	20	19	no	yes	0	0	1mar16_3jan16_G_m1_sp1_8.1_rev.tif	3jan16_G_m1	G male	G	male	Dom	M.musculus	1mar16_3jan16_G_m1_sp1_8.1_rev.tif_Batch0
Batch0		1mar16_3jan16_G_m1_sp1_8.2_rev.tif	26619-4703-17901.tif	1	20	22	yes	yes	0	0	1mar16_3jan16_G_m1_sp1_8.2_rev.tif	3jan16_G_m1	G male	G	male	Dom	M.musculus	1mar16_3jan16_G_m1_sp1_8.2_rev.tif_Batch0
Batch0		27mar16_6mar16_G_m1_sp1_15_rev.tif	2399-15245-20023.tif	1	20	22	no	yes	0	0	27mar16_6mar16_G_m1_sp1_15_rev.tif	6mar16_G_m1	G male	G	male	Dom	M.musculus	27mar16_6mar16_G_m1_sp1_15_rev.tif_Batch0
Batch0		27mar16_6mar16_G_m1_sp1_17_rev.tif	8587-12491-9667.tif	1	20	20	no	yes	0	0	27mar16_6mar16_G_m1_sp1_17_rev.tif	6mar16_G_m1	G male	G	male	Dom	M.musculus	27mar16_6mar16_G_m1_sp1_17_rev.tif_Batch0
Batch0		27mar16_6mar16_G_m1_sp1_18_rev.tif	25440-1773-12616.tif	1	20	23	no	yes	0	0	27mar16_6mar16_G_m1_sp1_18_rev.tif	6mar16_G_m1	G male	G	male	Dom	M.musculus	27mar16_6mar16_G_m1_sp1_18_rev.tif_Batch0
Batch0		27mar16_6mar16_G_m1_sp1_2_rev.tif	15119-32217-29032.tif	1	20	28	no	no	0	0	27mar16_6mar16_G_m1_sp1_2_rev.tif	6mar16_G_m1	G male	G	male	Dom	M.musculus	27mar16_6mar16_G_m1_sp1_2_rev.tif_Batch0
Batch0		27mar16_6mar16_G_m1_sp1_20_rev.tif	26066-20294-19231.tif	1	20	24	no	yes	0	0	27mar16_6mar16_G_m1_sp1_20_rev.tif	6mar16_G_m1	G male	G	male	Dom	M.musculus	27mar16_6mar16_G_m1_sp1_20_rev.tif_Batch0
Batch0		27mar16_6mar16_G_m1_sp1_21_rev.tif	10412-28589-17120.tif	1	20	23	no	yes	0	0	27mar16_6mar16_G_m1_sp1_21_rev.tif	6mar16_G_m1	G male	G	male	Dom	M.musculus	27mar16_6mar16_G_m1_sp1_21_rev.tif_Batch0
Batch0		9mar16_22feb16_G_m1_sp1_15.1_rev.tif	24094-11933-2775.tif	1	20	31	yes	yes	0	0	9mar16_22feb16_G_m1_sp1_15.1_rev.tif	22feb16_G_m1	G male	G	male	Dom	M.musculus	9mar16_22feb16_G_m1_sp1_15.1_rev.tif_Batch0
Batch0		20aug15_22jun15_G_m1_sp2_10_rev.tif	28518-29925-32197.tif	1	20	25	no	yes	1	0	20aug15_22jun15_G_m1_sp2_10_rev.tif	22jun15_G_m1	G male	G	male	Dom	M.musculus	20aug15_22jun15_G_m1_sp2_10_rev.tif_Batch0
Batch0		28jul15_22jun15_G_m2_sp1_15.1_rev.tif	10063-21348-9548.tif	1	20	19	no	yes	1	0	28jul15_22jun15_G_m2_sp1_15.1_rev.tif	22jun15_G_m2	G male	G	male	Dom	M.musculus	28jul15_22jun15_G_m2_sp1_15.1_rev.tif_Batch0
Batch1		1oct16_1apr16_G_m4_sp1_3_rev.tif	25440-26793-14853.tif	1	20	30	no	y	0	0	1oct16_1apr16_G_m4_sp1_3_rev.tif	1apr16_G_m4	G male	G	male	Dom	M.musculus	1oct16_1apr16_G_m4_sp1_3_rev.tif_Batch1
Batch1		1oct16_1apr16_G_m4_sp1_8_rev.tif	17014-7831-27633.tif	1	20	23	no	yes	0	0	1oct16_1apr16_G_m4_sp1_8_rev.tif	1apr16_G_m4	G male	G	male	Dom	M.musculus	1oct16_1apr16_G_m4_sp1_8_rev.tif_Batch1
Batch1		1oct16_1apr16_G_m4_sp1_4_rev.tif	5944-27898-16400.tif	1	20	26	y	y	0	0	1oct16_1apr16_G_m4_sp1_4_rev.tif	1apr16_G_m4	G male	G	male	Dom	M.musculus	1oct16_1apr16_G_m4_sp1_4_rev.tif_Batch1
Batch13		18feb15_30sep14_G_m2_sp2_7_rev.tif	6114-25146-9943.tif	1	20	21	no	yes	1	0	18feb15_30sep14_G_m2_sp2_7_rev.tif	30sep14_G_m2	G male	G	male	Dom	M.musculus	18feb15_30sep14_G_m2_sp2_7_rev.tif_Batch13
Batch13		12may15_25sep14_G_m1_sp2_14_rev.tif	446-3079-16802.tif	1	20	24	no	yes	0	0	12may15_25sep14_G_m1_sp2_14_rev.tif	25sep14_G_m1	G male	G	male	Dom	M.musculus	12may15_25sep14_G_m1_sp2_14_rev.tif_Batch13
Batch13		29mar15_25sep14_G_m1_sp2_12_rev.tif	29030-21774-8464.tif	1	20	27	no	yes	0	0	29mar15_25sep14_G_m1_sp2_12_rev.tif	25sep14_G_m1	G male	G	male	Dom	M.musculus	29mar15_25sep14_G_m1_sp2_12_rev.tif_Batch13
Batch13		23mar15_14mar15_G_m1_sp1_30_rev.tif	28277-20119-30979.tif	1	20	22	0	yes	0	0	23mar15_14mar15_G_m1_sp1_30_rev.tif	14mar15_G_m1	G male	G	male	Dom	M.musculus	23mar15_14mar15_G_m1_sp1_30_rev.tif_Batch13
Batch13		14feb15_30sep14_G_m2_sp2_28_rev.tif	25699-12145-5804.tif	1	20	31	no	yes	0	0	14feb15_30sep14_G_m2_sp2_28_rev.tif	30sep14_G_m2	G male	G	male	Dom	M.musculus	14feb15_30sep14_G_m2_sp2_28_rev.tif_Batch13
Batch13		12may15_25sep14_G_m1_sp2_8_rev.tif	23282-16338-17447.tif	1	20	29	no	yes	0	0	12may15_25sep14_G_m1_sp2_8_rev.tif	25sep14_G_m1	G male	G	male	Dom	M.musculus	12may15_25sep14_G_m1_sp2_8_rev.tif_Batch13
Batch13		21mar15_14mar15_G_m2_sp1_9.2_rev.tif	2258-24991-25259.tif	1	20	24	no	yes	0	0	21mar15_14mar15_G_m2_sp1_9.2_rev.tif	14mar15_G_m2	G male	G	male	Dom	M.musculus	21mar15_14mar15_G_m2_sp1_9.2_rev.tif_Batch13
Batch13		12may15_25sep14_G_m1_sp2_11_rev.tif	22496-1051-8264.tif	1	20	33	no	yes	0	0	12may15_25sep14_G_m1_sp2_11_rev.tif	25sep14_G_m1	G male	G	male	Dom	M.musculus	12may15_25sep14_G_m1_sp2_11_rev.tif_Batch13
Batch13		21mar15_14mar15_G_m2_sp1_2_rev.tif	21156-12441-22443.tif	1	20	22	yes, crop right corner	yes	0	0	21mar15_14mar15_G_m2_sp1_2_rev.tif	14mar15_G_m2	G male	G	male	Dom	M.musculus	21mar15_14mar15_G_m2_sp1_2_rev.tif_Batch13
Batch13		12may15_25sep14_G_m1_sp2_13_rev.tif	21140-2439-4944.tif	1	20	27	no	yes	0	0	12may15_25sep14_G_m1_sp2_13_rev.tif	25sep14_G_m1	G male	G	male	Dom	M.musculus	12may15_25sep14_G_m1_sp2_13_rev.tif_Batch13
Batch13		12may15_25sep14_G_m1_sp2_7_rev.tif	20728-26470-22568.tif	1	20	27	no	yes	0	0	12may15_25sep14_G_m1_sp2_7_rev.tif	25sep14_G_m1	G male	G	male	Dom	M.musculus	12may15_25sep14_G_m1_sp2_7_rev.tif_Batch13
Batch13		12may15_25sep14_G_m1_sp2_5_rev.tif	18862-3686-7598.tif	1	20	23	no	yes	0	0	12may15_25sep14_G_m1_sp2_5_rev.tif	25sep14_G_m1	G male	G	male	Dom	M.musculus	12may15_25sep14_G_m1_sp2_5_rev.tif_Batch13
Batch13		21mar15_14mar15_G_m2_sp1_7_rev.tif	18555-1461-22107.tif	1	20	21	no	yes	0	1	21mar15_14mar15_G_m2_sp1_7_rev.tif	14mar15_G_m2	G male	G	male	Dom	M.musculus	21mar15_14mar15_G_m2_sp1_7_rev.tif_Batch13
Batch13		21mar15_14mar15_G_m2_sp1_16.2_rev.tif	1688-9431-28341.tif	1	20	21	yes (top left corner)		0	0	21mar15_14mar15_G_m2_sp1_16.2_rev.tif	14mar15_G_m2	G male	G	male	Dom	M.musculus	21mar15_14mar15_G_m2_sp1_16.2_rev.tif_Batch13
Batch13		29mar15_25sep14_G_m1_sp2_10_rev.tif	15388-8521-8059.tif	1	20	24	no	yes	0	0	29mar15_25sep14_G_m1_sp2_10_rev.tif	25sep14_G_m1	G male	G	male	Dom	M.musculus	29mar15_25sep14_G_m1_sp2_10_rev.tif_Batch13
Batch13		23mar15_14mar15_G_m1_sp1_24.2_rev.tif	15000-8328-11134.tif	1	20	23	no	yes	0	0	23mar15_14mar15_G_m1_sp1_24.2_rev.tif	14mar15_G_m1	G male	G	male	Dom	M.musculus	23mar15_14mar15_G_m1_sp1_24.2_rev.tif_Batch13
Batch13		18feb15_30sep14_G_m2_sp2_2_rev.tif	11887-23425-7344.tif	1	20	27	no	yes	0	0	18feb15_30sep14_G_m2_sp2_2_rev.tif	30sep14_G_m2	G male	G	male	Dom	M.musculus	18feb15_30sep14_G_m2_sp2_2_rev.tif_Batch13
Batch3		1mar16_3jan16_G_m2_sp1_1_rev.tif	29129-10442-17527.tif	1	20	26	n	y	0	0	1mar16_3jan16_G_m2_sp1_1_rev.tif	3jan16_G_m2	G male	G	male	Dom	M.musculus	1mar16_3jan16_G_m2_sp1_1_rev.tif_Batch3
Batch3		1mar16_3jan16_G_m2_sp1_10_rev.tif	22836-1877-8059.tif	1	20	23		y	0	0	1mar16_3jan16_G_m2_sp1_10_rev.tif	3jan16_G_m2	G male	G	male	Dom	M.musculus	1mar16_3jan16_G_m2_sp1_10_rev.tif_Batch3
Batch3		1mar16_3jan16_G_m2_sp1_11.2_rev.tif	19726-27851-19430.tif	1	20	23		y	0	0	1mar16_3jan16_G_m2_sp1_11.2_rev.tif	3jan16_G_m2	G male	G	male	Dom	M.musculus	1mar16_3jan16_G_m2_sp1_11.2_rev.tif_Batch3
Batch3		1mar16_3jan16_G_m2_sp1_12_rev.tif	8533-32693-25532.tif	1	20	24	n	yes	0	0	1mar16_3jan16_G_m2_sp1_12_rev.tif	3jan16_G_m2	G male	G	male	Dom	M.musculus	1mar16_3jan16_G_m2_sp1_12_rev.tif_Batch3
Batch3		1mar16_3jan16_G_m2_sp1_13_rev.tif	10397-31691-32448.tif	1	20	22		y	0	0	1mar16_3jan16_G_m2_sp1_13_rev.tif	3jan16_G_m2	G male	G	male	Dom	M.musculus	1mar16_3jan16_G_m2_sp1_13_rev.tif_Batch3
Batch3		1mar16_3jan16_G_m2_sp1_14.1_rev.tif	6800-19080-7193.tif	1	20	23		y	0	0	1mar16_3jan16_G_m2_sp1_14.1_rev.tif	3jan16_G_m2	G male	G	male	Dom	M.musculus	1mar16_3jan16_G_m2_sp1_14.1_rev.tif_Batch3
Batch3		1mar16_3jan16_G_m2_sp1_14.2_rev.tif	32745-5159-31953.tif	1	20	24	y	y	0	0	1mar16_3jan16_G_m2_sp1_14.2_rev.tif	3jan16_G_m2	G male	G	male	Dom	M.musculus	1mar16_3jan16_G_m2_sp1_14.2_rev.tif_Batch3
Batch3		1mar16_3jan16_G_m2_sp1_16_rev.tif	6741-30834-11296.tif	1	20	26	n	y	0	0	1mar16_3jan16_G_m2_sp1_16_rev.tif	3jan16_G_m2	G male	G	male	Dom	M.musculus	1mar16_3jan16_G_m2_sp1_16_rev.tif_Batch3
Batch3		1mar16_3jan16_G_m2_sp1_17.1_rev.tif	24122-31472-31857.tif	1	20	22		y	0	0	1mar16_3jan16_G_m2_sp1_17.1_rev.tif	3jan16_G_m2	G male	G	male	Dom	M.musculus	1mar16_3jan16_G_m2_sp1_17.1_rev.tif_Batch3
Batch3		1mar16_3jan16_G_m2_sp1_17.2_rev.tif	24308-30852-17914.tif	1	20	22		y	0	0	1mar16_3jan16_G_m2_sp1_17.2_rev.tif	3jan16_G_m2	G male	G	male	Dom	M.musculus	1mar16_3jan16_G_m2_sp1_17.2_rev.tif_Batch3
Batch3		1mar16_3jan16_G_m2_sp1_18.1_rev.tif	14038-8570-3864.tif	1	20	23		y	0	0	1mar16_3jan16_G_m2_sp1_18.1_rev.tif	3jan16_G_m2	G male	G	male	Dom	M.musculus	1mar16_3jan16_G_m2_sp1_18.1_rev.tif_Batch3
Batch3		1mar16_3jan16_G_m2_sp1_19.3_rev.tif	1448-1924-5940.tif	1	20	23		y	0	0	1mar16_3jan16_G_m2_sp1_19.3_rev.tif	3jan16_G_m2	G male	G	male	Dom	M.musculus	1mar16_3jan16_G_m2_sp1_19.3_rev.tif_Batch3
Batch3		1mar16_3jan16_G_m2_sp1_2_rev.tif	13735-19305-15806.tif	1	20	26		y	0	0	1mar16_3jan16_G_m2_sp1_2_rev.tif	3jan16_G_m2	G male	G	male	Dom	M.musculus	1mar16_3jan16_G_m2_sp1_2_rev.tif_Batch3
Batch3		1mar16_3jan16_G_m2_sp1_20_rev.tif	12435-27458-18654.tif	1	20	21		y	0	0	1mar16_3jan16_G_m2_sp1_20_rev.tif	3jan16_G_m2	G male	G	male	Dom	M.musculus	1mar16_3jan16_G_m2_sp1_20_rev.tif_Batch3
Batch3		1mar16_3jan16_G_m2_sp1_21.2_rev.tif	18937-13885-11722.tif	1	20	26		y	0	0	1mar16_3jan16_G_m2_sp1_21.2_rev.tif	3jan16_G_m2	G male	G	male	Dom	M.musculus	1mar16_3jan16_G_m2_sp1_21.2_rev.tif_Batch3
Batch3		1mar16_3jan16_G_m2_sp1_22_rev.tif	1157-12510-8233.tif	1	20	24		y	0	0	1mar16_3jan16_G_m2_sp1_22_rev.tif	3jan16_G_m2	G male	G	male	Dom	M.musculus	1mar16_3jan16_G_m2_sp1_22_rev.tif_Batch3
Batch3		1mar16_3jan16_G_m2_sp1_23_rev.tif	9076-23416-3441.tif	1	20	20	n	y	1	0	1mar16_3jan16_G_m2_sp1_23_rev.tif	3jan16_G_m2	G male	G	male	Dom	M.musculus	1mar16_3jan16_G_m2_sp1_23_rev.tif_Batch3
Batch3		1mar16_3jan16_G_m2_sp1_25.2_rev.tif	31846-3933-6914.tif	1	20	27		y	0	0	1mar16_3jan16_G_m2_sp1_25.2_rev.tif	3jan16_G_m2	G male	G	male	Dom	M.musculus	1mar16_3jan16_G_m2_sp1_25.2_rev.tif_Batch3
Batch3		1mar16_3jan16_G_m2_sp1_6_rev.tif	29107-3185-21224.tif	1	20	26	n	y	0	0	1mar16_3jan16_G_m2_sp1_6_rev.tif	3jan16_G_m2	G male	G	male	Dom	M.musculus	1mar16_3jan16_G_m2_sp1_6_rev.tif_Batch3
Batch3		1mar16_3jan16_G_m2_sp1_7_rev.tif	28258-30339-6369.tif	1	20	25	n	y	0	0	1mar16_3jan16_G_m2_sp1_7_rev.tif	3jan16_G_m2	G male	G	male	Dom	M.musculus	1mar16_3jan16_G_m2_sp1_7_rev.tif_Batch3
Batch3		1mar16_3jan16_G_m2_sp1_8.2_rev.tif	693-28687-2965.tif	1	20	24		y	0	0	1mar16_3jan16_G_m2_sp1_8.2_rev.tif	3jan16_G_m2	G male	G	male	Dom	M.musculus	1mar16_3jan16_G_m2_sp1_8.2_rev.tif_Batch3
Batch3		1mar16_3jan16_G_m2_sp1_9.1_rev.tif	25464-7390-11308.tif	1	20	22	yes	y	0	0	1mar16_3jan16_G_m2_sp1_9.1_rev.tif	3jan16_G_m2	G male	G	male	Dom	M.musculus	1mar16_3jan16_G_m2_sp1_9.1_rev.tif_Batch3
Batch9		27mar16_6mar16_G_m3_sp1_6.3_rev.tif	10831-17214-3918.tif	1	20	29	no	yes	0	0	27mar16_6mar16_G_m3_sp1_6.3_rev.tif	6mar16_G_m3	G male	G	male	Dom	M.musculus	27mar16_6mar16_G_m3_sp1_6.3_rev.tif_Batch9
Batch9		27mar16_6mar16_G_m3_sp1_10.2_rev.tif	15251-22585-18999.tif	1	20	24	no	yes	0	0	27mar16_6mar16_G_m3_sp1_10.2_rev.tif	6mar16_G_m3	G male	G	male	Dom	M.musculus	27mar16_6mar16_G_m3_sp1_10.2_rev.tif_Batch9
Batch9		27mar16_6mar16_G_m3_sp1_18.1_rev.tif	15779-24399-29557.tif	1	20	23	yes	yes	0	0	27mar16_6mar16_G_m3_sp1_18.1_rev.tif	6mar16_G_m3	G male	G	male	Dom	M.musculus	27mar16_6mar16_G_m3_sp1_18.1_rev.tif_Batch9
Batch9		27mar16_6mar16_G_m3_sp1_11.2_rev.tif	16076-7968-6700.tif	1	20	21	no	yes	0	0	27mar16_6mar16_G_m3_sp1_11.2_rev.tif	6mar16_G_m3	G male	G	male	Dom	M.musculus	27mar16_6mar16_G_m3_sp1_11.2_rev.tif_Batch9
Batch9		27mar16_6mar16_G_m3_sp1_12_rev.tif	21219-29019-10637.tif	1	20	28	no	yes	0	0	27mar16_6mar16_G_m3_sp1_12_rev.tif	6mar16_G_m3	G male	G	male	Dom	M.musculus	27mar16_6mar16_G_m3_sp1_12_rev.tif_Batch9
Batch9		27mar16_6mar16_G_m3_sp1_9_rev.tif	22478-25136-32468.tif	1	20	24	no	yes	0	0	27mar16_6mar16_G_m3_sp1_9_rev.tif	6mar16_G_m3	G male	G	male	Dom	M.musculus	27mar16_6mar16_G_m3_sp1_9_rev.tif_Batch9
Batch9		27mar16_6mar16_G_m3_sp1_17.2_rev.tif	24143-27945-10552.tif	1	20	22	no	yes	0	0	27mar16_6mar16_G_m3_sp1_17.2_rev.tif	6mar16_G_m3	G male	G	male	Dom	M.musculus	27mar16_6mar16_G_m3_sp1_17.2_rev.tif_Batch9
Batch9		27mar16_6mar16_G_m3_sp1_11.1_rev.tif	29663-12720-23253.tif	1	20	26	no	yes	0	0	27mar16_6mar16_G_m3_sp1_11.1_rev.tif	6mar16_G_m3	G male	G	male	Dom	M.musculus	27mar16_6mar16_G_m3_sp1_11.1_rev.tif_Batch9
Batch9		27mar16_6mar16_G_m3_sp1_4_rev.tif	29750-26889-30380.tif	1	20	24	no	yes	0	0	27mar16_6mar16_G_m3_sp1_4_rev.tif	6mar16_G_m3	G male	G	male	Dom	M.musculus	27mar16_6mar16_G_m3_sp1_4_rev.tif_Batch9
Batch9		27mar16_6mar16_G_m3_sp1_2_rev.tif	30623-5260-21207.tif	1	20	22	no	yes	1	0	27mar16_6mar16_G_m3_sp1_2_rev.tif	6mar16_G_m3	G male	G	male	Dom	M.musculus	27mar16_6mar16_G_m3_sp1_2_rev.tif_Batch9
Batch9		27mar16_6mar16_G_m3_sp1_14_rev.tif	4779-25945-27067.tif	1	20	22	no	yes	0	0	27mar16_6mar16_G_m3_sp1_14_rev.tif	6mar16_G_m3	G male	G	male	Dom	M.musculus	27mar16_6mar16_G_m3_sp1_14_rev.tif_Batch9
Batch9		27mar16_6mar16_G_m3_sp1_15.3_rev.tif	4921-12791-3197.tif	1	20	21	yes	yes	0	0	27mar16_6mar16_G_m3_sp1_15.3_rev.tif	6mar16_G_m3	G male	G	male	Dom	M.musculus	27mar16_6mar16_G_m3_sp1_15.3_rev.tif_Batch9
Batch9		27mar16_6mar16_G_m3_sp1_13.2_rev.tif	7360-18551-12026.tif	1	20	21	no	yes	0	0	27mar16_6mar16_G_m3_sp1_13.2_rev.tif	6mar16_G_m3	G male	G	male	Dom	M.musculus	27mar16_6mar16_G_m3_sp1_13.2_rev.tif_Batch9
Batch9		27mar16_6mar16_G_m3_sp1_20_rev.tif	7832-22153-18780.tif	1	20	26	no	yes	0	0	27mar16_6mar16_G_m3_sp1_20_rev.tif	6mar16_G_m3	G male	G	male	Dom	M.musculus	27mar16_6mar16_G_m3_sp1_20_rev.tif_Batch9
Batch9		27mar16_6mar16_G_m3_sp1_8_rev.tif	821-19388-27164.tif	1	20	22	no	yes	0	0	27mar16_6mar16_G_m3_sp1_8_rev.tif	6mar16_G_m3	G male	G	male	Dom	M.musculus	27mar16_6mar16_G_m3_sp1_8_rev.tif_Batch9
Batch16		27mar16_6mar16_G_m2_sp1_8.2_rev.tif	4093-5121-27737.tif	1	20	19	yes	yes	0	0	27mar16_6mar16_G_m2_sp1_8.2_rev.tif	6mar16_G_m2	G male	G	male	Dom	M.musculus	27mar16_6mar16_G_m2_sp1_8.2_rev.tif_Batch16
Batch16		27mar16_6mar16_G_m2_sp1_6.2_rev.tif	18143-8744-16909.tif	1	20	23	no	yes	0	0	27mar16_6mar16_G_m2_sp1_6.2_rev.tif	6mar16_G_m2	G male	G	male	Dom	M.musculus	27mar16_6mar16_G_m2_sp1_6.2_rev.tif_Batch16
Batch16		27mar16_6mar16_G_m2_sp1_6.1_rev.tif	5847-3783-15695.tif	1	20	25	no	yes	0	0	27mar16_6mar16_G_m2_sp1_6.1_rev.tif	6mar16_G_m2	G male	G	male	Dom	M.musculus	27mar16_6mar16_G_m2_sp1_6.1_rev.tif_Batch16
Batch16		27mar16_6mar16_G_m2_sp1_5.1_rev.tif	15484-8168-29401.tif	1	20	23	no	yes	1	0	27mar16_6mar16_G_m2_sp1_5.1_rev.tif	6mar16_G_m2	G male	G	male	Dom	M.musculus	27mar16_6mar16_G_m2_sp1_5.1_rev.tif_Batch16
Batch16		27mar16_6mar16_G_m2_sp1_4_rev.tif	23216-29002-32040.tif	1	20	24	no	yes	1	0	27mar16_6mar16_G_m2_sp1_4_rev.tif	6mar16_G_m2	G male	G	male	Dom	M.musculus	27mar16_6mar16_G_m2_sp1_4_rev.tif_Batch16
Batch16		27mar16_6mar16_G_m2_sp1_2_rev.tif	27287-9123-29377.tif	1	20	20	no	yes	1	0	27mar16_6mar16_G_m2_sp1_2_rev.tif	6mar16_G_m2	G male	G	male	Dom	M.musculus	27mar16_6mar16_G_m2_sp1_2_rev.tif_Batch16
Batch16		27mar16_6mar16_G_m2_sp1_10_rev.tif	28377-18949-16278.tif	1	20	24	no	yes	0	0	27mar16_6mar16_G_m2_sp1_10_rev.tif	6mar16_G_m2	G male	G	male	Dom	M.musculus	27mar16_6mar16_G_m2_sp1_10_rev.tif_Batch16
Batch16		14feb15_30sep14_G_m3_sp2_25_rev.tif	29835-5997-8582.tif	1	20	28	no	yes	0	0	14feb15_30sep14_G_m3_sp2_25_rev.tif	30sep14_G_m3	G male	G	male	Dom	M.musculus	14feb15_30sep14_G_m3_sp2_25_rev.tif_Batch16
Batch16		13jan15_30sep14_G_m1_sp1_6_rev.tif	23807-16153-74.tif	1	20	24	no	yes	0	0	13jan15_30sep14_G_m1_sp1_6_rev.tif	30sep14_G_m1	G male	G	male	Dom	M.musculus	13jan15_30sep14_G_m1_sp1_6_rev.tif_Batch16
Batch16		13feb15_30sep14_G_m3_sp2_10_rev.tif	10965-15333-22581.tif	1	20	19	no	yes	1	0	13feb15_30sep14_G_m3_sp2_10_rev.tif	30sep14_G_m3	G male	G	male	Dom	M.musculus	13feb15_30sep14_G_m3_sp2_10_rev.tif_Batch16
Batch16		12may15_30sep14_G_m5_sp1_26_rev.tif	3562-18145-32087.tif	1	20	23	no	yes	1	0	12may15_30sep14_G_m5_sp1_26_rev.tif	30sep14_G_m5	G male	G	male	Dom	M.musculus	12may15_30sep14_G_m5_sp1_26_rev.tif_Batch16
Batch16		11jan15_30sep14_G_m1_sp1_3_rev.tif	18262-5541-21686.tif	1	20	27	no	yes	0	0	11jan15_30sep14_G_m1_sp1_3_rev.tif	30sep14_G_m1	G male	G	male	Dom	M.musculus	11jan15_30sep14_G_m1_sp1_3_rev.tif_Batch16
Batch7		29dec17_4dec17_HMI_m1_sp1_29_rev.tif	24051-22380-12979.tif	1	20	26	n	y	0	0	29dec17_4dec17_HMI_m1_sp1_29_rev.tif	4dec17_HMI_m1	HMI male	HMI	male	Cast	M.musculus	29dec17_4dec17_HMI_m1_sp1_29_rev.tif_Batch7
Batch7		29dec17_4dec17_HMI_m1_sp1_32_rev.tif	9099-2599-1455.tif	1	20	28	no	yes	0	0	29dec17_4dec17_HMI_m1_sp1_32_rev.tif	4dec17_HMI_m1	HMI male	HMI	male	Cast	M.musculus	29dec17_4dec17_HMI_m1_sp1_32_rev.tif_Batch7
batch10		16feb18_1feb18_KAZ_f2_sp1_28_rev.tif	20494-10897-10719.tif	1	20	20	no		0	1	16feb18_1feb18_KAZ_f2_sp1_28_rev.tif	1feb18_KAZ_f2	KAZ female	KAZ	female	Musc	M.musculus	16feb18_1feb18_KAZ_f2_sp1_28_rev.tif_batch10
batch10		8feb18_1feb18_KAZ_f1_sp1_30_rev.tif	851-4339-24529.tif	1	20	22	no		0	1	8feb18_1feb18_KAZ_f1_sp1_30_rev.tif	1feb18_KAZ_f1	KAZ female	KAZ	female	Musc	M.musculus	8feb18_1feb18_KAZ_f1_sp1_30_rev.tif_batch10
batch10		16feb18_1feb18_KAZ_f2_sp1_29_rev.tif	32420-19132-32752.tif	1	20	23	no		0	0	16feb18_1feb18_KAZ_f2_sp1_29_rev.tif	1feb18_KAZ_f2	KAZ female	KAZ	female	Musc	M.musculus	16feb18_1feb18_KAZ_f2_sp1_29_rev.tif_batch10
batch10		8feb18_1feb18_KAZ_f1_sp1_8_rev.tif	11108-26377-9532.tif	1	20	24	no		0	0	8feb18_1feb18_KAZ_f1_sp1_8_rev.tif	1feb18_KAZ_f1	KAZ female	KAZ	female	Musc	M.musculus	8feb18_1feb18_KAZ_f1_sp1_8_rev.tif_batch10
batch10		8feb18_1feb18_KAZ_f1_sp1_12_rev.tif	22701-1892-4394.tif	1	20	24	no		0	1	8feb18_1feb18_KAZ_f1_sp1_12_rev.tif	1feb18_KAZ_f1	KAZ female	KAZ	female	Musc	M.musculus	8feb18_1feb18_KAZ_f1_sp1_12_rev.tif_batch10
batch10		8feb18_1feb18_KAZ_f1_sp1_25_rev.tif	8817-17510-5194.tif	1	20	24	no		0	0	8feb18_1feb18_KAZ_f1_sp1_25_rev.tif	1feb18_KAZ_f1	KAZ female	KAZ	female	Musc	M.musculus	8feb18_1feb18_KAZ_f1_sp1_25_rev.tif_batch10
batch10		8feb18_1feb18_KAZ_f1_sp1_3_rev.tif	25771-14253-14371.tif	1	20	24	no		0	0	8feb18_1feb18_KAZ_f1_sp1_3_rev.tif	1feb18_KAZ_f1	KAZ female	KAZ	female	Musc	M.musculus	8feb18_1feb18_KAZ_f1_sp1_3_rev.tif_batch10
batch10		16feb18_1feb18_KAZ_f2_sp1_13_rev.tif	11786-1567-14691.tif	1	20	25	no		0	0	16feb18_1feb18_KAZ_f2_sp1_13_rev.tif	1feb18_KAZ_f2	KAZ female	KAZ	female	Musc	M.musculus	16feb18_1feb18_KAZ_f2_sp1_13_rev.tif_batch10
batch10		16feb18_1feb18_KAZ_f4_sp1_6_rev.tif	9850-26461-28817.tif	1	20	25	no		0	0	16feb18_1feb18_KAZ_f4_sp1_6_rev.tif	1feb18_KAZ_f4	KAZ female	KAZ	female	Musc	M.musculus	16feb18_1feb18_KAZ_f4_sp1_6_rev.tif_batch10
batch10		16feb18_1feb18_KAZ_f2_sp1_22_rev.tif	7585-23427-31854.tif	1	20	25	no		0	0	16feb18_1feb18_KAZ_f2_sp1_22_rev.tif	1feb18_KAZ_f2	KAZ female	KAZ	female	Musc	M.musculus	16feb18_1feb18_KAZ_f2_sp1_22_rev.tif_batch10
batch10		16feb18_1feb18_KAZ_f4_sp1_7_rev.tif	31630-2107-13563.tif	1	20	25	no		0	0	16feb18_1feb18_KAZ_f4_sp1_7_rev.tif	1feb18_KAZ_f4	KAZ female	KAZ	female	Musc	M.musculus	16feb18_1feb18_KAZ_f4_sp1_7_rev.tif_batch10
batch10		8feb18_1feb18_KAZ_f1_sp1_22_rev.tif	14203-12763-19026.tif	1	20	26	no		0	0	8feb18_1feb18_KAZ_f1_sp1_22_rev.tif	1feb18_KAZ_f1	KAZ female	KAZ	female	Musc	M.musculus	8feb18_1feb18_KAZ_f1_sp1_22_rev.tif_batch10
batch10		16feb18_1feb18_KAZ_f2_sp1_20_rev.tif	17592-16212-18985.tif	1	20	27	no		0	0	16feb18_1feb18_KAZ_f2_sp1_20_rev.tif	1feb18_KAZ_f2	KAZ female	KAZ	female	Musc	M.musculus	16feb18_1feb18_KAZ_f2_sp1_20_rev.tif_batch10
batch10		16feb18_1feb18_KAZ_f2_sp1_11.2_rev.tif	10566-3970-27796.tif	1	20	28	no		0	0	16feb18_1feb18_KAZ_f2_sp1_11.2_rev.tif	1feb18_KAZ_f2	KAZ female	KAZ	female	Musc	M.musculus	16feb18_1feb18_KAZ_f2_sp1_11.2_rev.tif_batch10
batch10		16feb18_1feb18_KAZ_f2_sp1_6_rev.tif	15379-5875-5641.tif	1	20	29	no		0	1	16feb18_1feb18_KAZ_f2_sp1_6_rev.tif	1feb18_KAZ_f2	KAZ female	KAZ	female	Musc	M.musculus	16feb18_1feb18_KAZ_f2_sp1_6_rev.tif_batch10
batch10		16feb18_1feb18_KAZ_f4_sp1_10_rev.tif	6310-7292-13930.tif	1	20	29	no		1	1	16feb18_1feb18_KAZ_f4_sp1_10_rev.tif	1feb18_KAZ_f4	KAZ female	KAZ	female	Musc	M.musculus	16feb18_1feb18_KAZ_f4_sp1_10_rev.tif_batch10
batch10		16feb18_1feb18_KAZ_f2_sp1_9_rev.tif	28372-28122-20234.tif	1	20	30	no		0	0	16feb18_1feb18_KAZ_f2_sp1_9_rev.tif	1feb18_KAZ_f2	KAZ female	KAZ	female	Musc	M.musculus	16feb18_1feb18_KAZ_f2_sp1_9_rev.tif_batch10
batch10		16feb18_1feb18_KAZ_f4_sp1_22_rev.tif	17885-15837-31127.tif	1	20	34	no		0	0	16feb18_1feb18_KAZ_f4_sp1_22_rev.tif	1feb18_KAZ_f4	KAZ female	KAZ	female	Musc	M.musculus	16feb18_1feb18_KAZ_f4_sp1_22_rev.tif_batch10
batch12		5apr18_11jan18_KAZ_f2_sp1_26_rev.tif	9916-29434-19836.tif	1	20	23	no		0	0	5apr18_11jan18_KAZ_f2_sp1_26_rev.tif	11jan18_KAZ_f2	KAZ female	KAZ	female	Musc	M.musculus	5apr18_11jan18_KAZ_f2_sp1_26_rev.tif_batch12
batch12		5apr18_11jan18_KAZ_f2_sp1_9_rev.tif	27766-25636-10871.tif	1	20	23	no		0	0	5apr18_11jan18_KAZ_f2_sp1_9_rev.tif	11jan18_KAZ_f2	KAZ female	KAZ	female	Musc	M.musculus	5apr18_11jan18_KAZ_f2_sp1_9_rev.tif_batch12
batch12		5apr18_11jan18_KAZ_f2_sp1_25_rev.tif	24004-896-25412.tif	1	20	24	no		0	0	5apr18_11jan18_KAZ_f2_sp1_25_rev.tif	11jan18_KAZ_f2	KAZ female	KAZ	female	Musc	M.musculus	5apr18_11jan18_KAZ_f2_sp1_25_rev.tif_batch12
Batch14		20apr18_11jan18_KAZ_f1_sp1_7_rev.tif	25405-14695-25354.tif	1	20	24	no		0	0	20apr18_11jan18_KAZ_f1_sp1_7_rev.tif	11jan18_KAZ_f1	KAZ female	KAZ	female	Musc	M.musculus	20apr18_11jan18_KAZ_f1_sp1_7_rev.tif_Batch14
Batch14		20apr18_11jan18_KAZ_f1_sp1_30_rev.tif	7224-7739-18816.tif	1	20	27	no		0	0	20apr18_11jan18_KAZ_f1_sp1_30_rev.tif	11jan18_KAZ_f1	KAZ female	KAZ	female	Musc	M.musculus	20apr18_11jan18_KAZ_f1_sp1_30_rev.tif_Batch14
Batch14		20apr18_11jan18_KAZ_f1_sp1_27_rev.tif	17345-32756-25495.tif	1	20	25	no		0	0	20apr18_11jan18_KAZ_f1_sp1_27_rev.tif	11jan18_KAZ_f1	KAZ female	KAZ	female	Musc	M.musculus	20apr18_11jan18_KAZ_f1_sp1_27_rev.tif_Batch14
Batch14		20apr18_11jan18_KAZ_f1_sp1_12_rev.tif	24709-30950-21511.tif	1	20	26	no		0	1	20apr18_11jan18_KAZ_f1_sp1_12_rev.tif	11jan18_KAZ_f1	KAZ female	KAZ	female	Musc	M.musculus	20apr18_11jan18_KAZ_f1_sp1_12_rev.tif_Batch14
Batch14		20apr18_11jan18_KAZ_f1_sp1_1_rev.tif	13274-25414-15177.tif	1	20	26	no		0	0	20apr18_11jan18_KAZ_f1_sp1_1_rev.tif	11jan18_KAZ_f1	KAZ female	KAZ	female	Musc	M.musculus	20apr18_11jan18_KAZ_f1_sp1_1_rev.tif_Batch14
Batch14		1mar18_1feb18_KAZ_f3_sp1_4_rev.tif	13738-5401-21449.tif	1	20	23	no		0	0	1mar18_1feb18_KAZ_f3_sp1_4_rev.tif	1feb18_KAZ_f3	KAZ female	KAZ	female	Musc	M.musculus	1mar18_1feb18_KAZ_f3_sp1_4_rev.tif_Batch14
Batch14		1mar18_1feb18_KAZ_f3_sp1_3_rev.tif	29426-10946-22260.tif	1	20	22	no		0	0	1mar18_1feb18_KAZ_f3_sp1_3_rev.tif	1feb18_KAZ_f3	KAZ female	KAZ	female	Musc	M.musculus	1mar18_1feb18_KAZ_f3_sp1_3_rev.tif_Batch14
Batch14		1mar18_1feb18_KAZ_f3_sp1_2_rev.tif	20951-3660-15009.tif	1	20	24	no		0	0	1mar18_1feb18_KAZ_f3_sp1_2_rev.tif	1feb18_KAZ_f3	KAZ female	KAZ	female	Musc	M.musculus	1mar18_1feb18_KAZ_f3_sp1_2_rev.tif_Batch14
Batch14		1mar18_1feb18_KAZ_f3_sp1_11_rev.tif	32397-28738-32227.tif	1	20	27	no		1	0	1mar18_1feb18_KAZ_f3_sp1_11_rev.tif	1feb18_KAZ_f3	KAZ female	KAZ	female	Musc	M.musculus	1mar18_1feb18_KAZ_f3_sp1_11_rev.tif_Batch14
Batch14		13apr18_1feb18_KAZ_f6_sp1_4_rev.tif	30004-15675-4.tif	1	20	34	no		0	0	13apr18_1feb18_KAZ_f6_sp1_4_rev.tif	1feb18_KAZ_f6	KAZ female	KAZ	female	Musc	M.musculus	13apr18_1feb18_KAZ_f6_sp1_4_rev.tif_Batch14
Batch14		13apr18_1feb18_KAZ_f6_sp1_32_rev.tif	14775-318-11433.tif	1	20	25	no		0	0	13apr18_1feb18_KAZ_f6_sp1_32_rev.tif	1feb18_KAZ_f6	KAZ female	KAZ	female	Musc	M.musculus	13apr18_1feb18_KAZ_f6_sp1_32_rev.tif_Batch14
Batch14		13apr18_1feb18_KAZ_f6_sp1_31_rev.tif	3936-17042-12973.tif	1	20	36	no		0	1	13apr18_1feb18_KAZ_f6_sp1_31_rev.tif	1feb18_KAZ_f6	KAZ female	KAZ	female	Musc	M.musculus	13apr18_1feb18_KAZ_f6_sp1_31_rev.tif_Batch14
Batch14		13apr18_1feb18_KAZ_f6_sp1_3_rev.tif	29715-10690-31277.tif	1	20	25	no		0	0	13apr18_1feb18_KAZ_f6_sp1_3_rev.tif	1feb18_KAZ_f6	KAZ female	KAZ	female	Musc	M.musculus	13apr18_1feb18_KAZ_f6_sp1_3_rev.tif_Batch14
Batch14		13apr18_1feb18_KAZ_f6_sp1_29_rev.tif	23392-30257-25408.tif	1	20	27	no		0	0	13apr18_1feb18_KAZ_f6_sp1_29_rev.tif	1feb18_KAZ_f6	KAZ female	KAZ	female	Musc	M.musculus	13apr18_1feb18_KAZ_f6_sp1_29_rev.tif_Batch14
Batch14		13apr18_1feb18_KAZ_f6_sp1_27_rev.tif	26674-29497-17103.tif	1	20	24	no		0	0	13apr18_1feb18_KAZ_f6_sp1_27_rev.tif	1feb18_KAZ_f6	KAZ female	KAZ	female	Musc	M.musculus	13apr18_1feb18_KAZ_f6_sp1_27_rev.tif_Batch14
Batch14		13apr18_1feb18_KAZ_f6_sp1_24_rev.tif	24262-12305-32673.tif	1	20	34	no		1	1	13apr18_1feb18_KAZ_f6_sp1_24_rev.tif	1feb18_KAZ_f6	KAZ female	KAZ	female	Musc	M.musculus	13apr18_1feb18_KAZ_f6_sp1_24_rev.tif_Batch14
Batch14		13apr18_1feb18_KAZ_f6_sp1_23_rev.tif	13050-7074-30865.tif	1	20	28	no		1	0	13apr18_1feb18_KAZ_f6_sp1_23_rev.tif	1feb18_KAZ_f6	KAZ female	KAZ	female	Musc	M.musculus	13apr18_1feb18_KAZ_f6_sp1_23_rev.tif_Batch14
Batch14		13apr18_1feb18_KAZ_f6_sp1_22_rev.tif	16193-12546-19007.tif	1	20	24	no		0	0	13apr18_1feb18_KAZ_f6_sp1_22_rev.tif	1feb18_KAZ_f6	KAZ female	KAZ	female	Musc	M.musculus	13apr18_1feb18_KAZ_f6_sp1_22_rev.tif_Batch14
Batch14		13apr18_1feb18_KAZ_f6_sp1_20_rev.tif	19426-4785-17439.tif	1	20	24	no		0	0	13apr18_1feb18_KAZ_f6_sp1_20_rev.tif	1feb18_KAZ_f6	KAZ female	KAZ	female	Musc	M.musculus	13apr18_1feb18_KAZ_f6_sp1_20_rev.tif_Batch14
Batch14		13apr18_1feb18_KAZ_f6_sp1_2_rev.tif	20158-29358-6226.tif	1	20	32	no		0	0	13apr18_1feb18_KAZ_f6_sp1_2_rev.tif	1feb18_KAZ_f6	KAZ female	KAZ	female	Musc	M.musculus	13apr18_1feb18_KAZ_f6_sp1_2_rev.tif_Batch14
Batch14		13apr18_1feb18_KAZ_f6_sp1_16_rev.tif	29139-28156-6434.tif	1	20	30	no		0	0	13apr18_1feb18_KAZ_f6_sp1_16_rev.tif	1feb18_KAZ_f6	KAZ female	KAZ	female	Musc	M.musculus	13apr18_1feb18_KAZ_f6_sp1_16_rev.tif_Batch14
Batch14		13apr18_1feb18_KAZ_f6_sp1_15_rev.tif	23924-4341-2257.tif	1	20	24	no		0	0	13apr18_1feb18_KAZ_f6_sp1_15_rev.tif	1feb18_KAZ_f6	KAZ female	KAZ	female	Musc	M.musculus	13apr18_1feb18_KAZ_f6_sp1_15_rev.tif_Batch14
Batch14		13apr18_1feb18_KAZ_f6_sp1_13_rev.tif	21065-14285-8890.tif	1	20	20	no		0	0	13apr18_1feb18_KAZ_f6_sp1_13_rev.tif	1feb18_KAZ_f6	KAZ female	KAZ	female	Musc	M.musculus	13apr18_1feb18_KAZ_f6_sp1_13_rev.tif_Batch14
Batch14		13apr18_1feb18_KAZ_f6_sp1_12_rev.tif	7982-4648-28214.tif	1	20	30	no		0	0	13apr18_1feb18_KAZ_f6_sp1_12_rev.tif	1feb18_KAZ_f6	KAZ female	KAZ	female	Musc	M.musculus	13apr18_1feb18_KAZ_f6_sp1_12_rev.tif_Batch14
Batch14		13apr18_1feb18_KAZ_f5_sp1_29_rev.tif	31122-21889-12203.tif	1	20	23	no		0	0	13apr18_1feb18_KAZ_f5_sp1_29_rev.tif	1feb18_KAZ_f5	KAZ female	KAZ	female	Musc	M.musculus	13apr18_1feb18_KAZ_f5_sp1_29_rev.tif_Batch14
Batch14		13apr18_1feb18_KAZ_f5_sp1_28_rev.tif	22590-21011-32490.tif	1	20	28	no		0	1	13apr18_1feb18_KAZ_f5_sp1_28_rev.tif	1feb18_KAZ_f5	KAZ female	KAZ	female	Musc	M.musculus	13apr18_1feb18_KAZ_f5_sp1_28_rev.tif_Batch14
Batch14		13apr18_1feb18_KAZ_f5_sp1_23_rev.tif	7532-10289-25893.tif	1	20	26	no		0	0	13apr18_1feb18_KAZ_f5_sp1_23_rev.tif	1feb18_KAZ_f5	KAZ female	KAZ	female	Musc	M.musculus	13apr18_1feb18_KAZ_f5_sp1_23_rev.tif_Batch14
Batch14		13apr18_1feb18_KAZ_f5_sp1_18_rev.tif	32614-21464-17745.tif	1	20	26	no		0	0	13apr18_1feb18_KAZ_f5_sp1_18_rev.tif	1feb18_KAZ_f5	KAZ female	KAZ	female	Musc	M.musculus	13apr18_1feb18_KAZ_f5_sp1_18_rev.tif_Batch14
Batch14		13apr18_1feb18_KAZ_f5_sp1_12_rev.tif	5793-9722-4321.tif	1	20	22	no		0	0	13apr18_1feb18_KAZ_f5_sp1_12_rev.tif	1feb18_KAZ_f5	KAZ female	KAZ	female	Musc	M.musculus	13apr18_1feb18_KAZ_f5_sp1_12_rev.tif_Batch14
Batch14		13apr18_1feb18_KAZ_f5_sp1_1_rev.tif	10525-20605-13926.tif	1	20	30	no		0	1	13apr18_1feb18_KAZ_f5_sp1_1_rev.tif	1feb18_KAZ_f5	KAZ female	KAZ	female	Musc	M.musculus	13apr18_1feb18_KAZ_f5_sp1_1_rev.tif_Batch14
Batch7		21nov17_7nov17_KAZ_m1_sp1_2.3_rev.tif	6179-20894-2916.tif	1	20	23	no	yes	0	0	21nov17_7nov17_KAZ_m1_sp1_2.3_rev.tif	7nov17_KAZ_m1	KAZ male	KAZ	male	Musc	M.musculus	21nov17_7nov17_KAZ_m1_sp1_2.3_rev.tif_Batch7
Batch7		21nov17_7nov17_KAZ_m1_sp1_2.2_rev.tif	13228-6171-9563.tif	1	20	23	n	y	0	0	21nov17_7nov17_KAZ_m1_sp1_2.2_rev.tif	7nov17_KAZ_m1	KAZ male	KAZ	male	Musc	M.musculus	21nov17_7nov17_KAZ_m1_sp1_2.2_rev.tif_Batch7
Batch7		22dec17_4dec17_KAZ_m1_sp1_34_rev.tif	26899-18406-376.tif	1	20	24	n	y	0	0	22dec17_4dec17_KAZ_m1_sp1_34_rev.tif	4dec17_KAZ_m1	KAZ male	KAZ	male	Musc	M.musculus	22dec17_4dec17_KAZ_m1_sp1_34_rev.tif_Batch7
Batch7		21nov17_7nov17_KAZ_m1_sp1_7.3_rev.tif	10674-2415-11095.tif	1	20	24	yes	n	0	0	21nov17_7nov17_KAZ_m1_sp1_7.3_rev.tif	7nov17_KAZ_m1	KAZ male	KAZ	male	Musc	M.musculus	21nov17_7nov17_KAZ_m1_sp1_7.3_rev.tif_Batch7
Batch7		21nov17_7nov17_KAZ_m1_sp1_3_rev.tif	23096-31351-21768.tif	1	20	25	n	y	0	0	21nov17_7nov17_KAZ_m1_sp1_3_rev.tif	7nov17_KAZ_m1	KAZ male	KAZ	male	Musc	M.musculus	21nov17_7nov17_KAZ_m1_sp1_3_rev.tif_Batch7
Batch7		21nov17_7nov17_KAZ_m1_sp1_2.1_rev.tif	4280-21317-10210.tif	1	20	26	no	yes	0	0	21nov17_7nov17_KAZ_m1_sp1_2.1_rev.tif	7nov17_KAZ_m1	KAZ male	KAZ	male	Musc	M.musculus	21nov17_7nov17_KAZ_m1_sp1_2.1_rev.tif_Batch7
Batch7		22dec17_4dec17_KAZ_m1_sp1_14_rev.tif	10528-9461-23260.tif	1	20	27	n	y	0	0	22dec17_4dec17_KAZ_m1_sp1_14_rev.tif	4dec17_KAZ_m1	KAZ male	KAZ	male	Musc	M.musculus	22dec17_4dec17_KAZ_m1_sp1_14_rev.tif_Batch7
Batch9		22feb18_1feb18_KAZ_m1_sp1_25.2_rev.tif	11044-29330-29324.tif	1	20	25	no	yes	0	0	22feb18_1feb18_KAZ_m1_sp1_25.2_rev.tif	1feb18_KAZ_m1	KAZ male	KAZ	male	Musc	M.musculus	22feb18_1feb18_KAZ_m1_sp1_25.2_rev.tif_Batch9
Batch9		22feb18_1feb18_KAZ_m1_sp1_11.1_rev.tif	12797-23814-1838.tif	1	20	22	no	yes	0	0	22feb18_1feb18_KAZ_m1_sp1_11.1_rev.tif	1feb18_KAZ_m1	KAZ male	KAZ	male	Musc	M.musculus	22feb18_1feb18_KAZ_m1_sp1_11.1_rev.tif_Batch9
Batch9		22feb18_1feb18_KAZ_m1_sp1_19_rev.tif	14005-17647-19658.tif	1	20	21	no	yes	0	0	22feb18_1feb18_KAZ_m1_sp1_19_rev.tif	1feb18_KAZ_m1	KAZ male	KAZ	male	Musc	M.musculus	22feb18_1feb18_KAZ_m1_sp1_19_rev.tif_Batch9
Batch9		26jan18_11jan18_KAZ_m3_sp1_23.1_rev.tif	16392-21101-15360.tif	1	20	25	no	yes	0	0	26jan18_11jan18_KAZ_m3_sp1_23.1_rev.tif	11jan18_KAZ_m3	KAZ male	KAZ	male	Musc	M.musculus	26jan18_11jan18_KAZ_m3_sp1_23.1_rev.tif_Batch9
Batch9		22feb18_1feb18_KAZ_m1_sp1_5_rev.tif	19434-22700-15270.tif	1	20	22	no	yes	0	0	22feb18_1feb18_KAZ_m1_sp1_5_rev.tif	1feb18_KAZ_m1	KAZ male	KAZ	male	Musc	M.musculus	22feb18_1feb18_KAZ_m1_sp1_5_rev.tif_Batch9
Batch9		22feb18_1feb18_KAZ_m1_sp1_10.3_rev.tif	25974-32426-28515.tif	1	20	21	no	yes	0	0	22feb18_1feb18_KAZ_m1_sp1_10.3_rev.tif	1feb18_KAZ_m1	KAZ male	KAZ	male	Musc	M.musculus	22feb18_1feb18_KAZ_m1_sp1_10.3_rev.tif_Batch9
Batch9		16mar18_11jan18_KAZ_m1_sp1_5.2_rev.tif	29442-26474-986.tif	1	20	19	no	yes	2	0	16mar18_11jan18_KAZ_m1_sp1_5.2_rev.tif	11jan18_KAZ_m1	KAZ male	KAZ	male	Musc	M.musculus	16mar18_11jan18_KAZ_m1_sp1_5.2_rev.tif_Batch9
Batch9		22feb18_1feb18_KAZ_m1_sp1_13_rev.tif	30458-22640-24507.tif	1	20	25	no	yes	0	0	22feb18_1feb18_KAZ_m1_sp1_13_rev.tif	1feb18_KAZ_m1	KAZ male	KAZ	male	Musc	M.musculus	22feb18_1feb18_KAZ_m1_sp1_13_rev.tif_Batch9
Batch9		22feb18_1feb18_KAZ_m1_sp1_26.1_rev.tif	32064-21741-24441.tif	1	20	21	no	yes	0	0	22feb18_1feb18_KAZ_m1_sp1_26.1_rev.tif	1feb18_KAZ_m1	KAZ male	KAZ	male	Musc	M.musculus	22feb18_1feb18_KAZ_m1_sp1_26.1_rev.tif_Batch9
Batch11		5jun18_21may18_KAZ_m2_sp1_12_rev.tif	19899-17368-4946.tif	1	20	20	no	yes	1	0	5jun18_21may18_KAZ_m2_sp1_12_rev.tif	21may18_KAZ_m2	KAZ male	KAZ	male	Musc	M.musculus	5jun18_21may18_KAZ_m2_sp1_12_rev.tif_Batch11
Batch11		5jun18_21may18_KAZ_m2_sp1_19.2_rev.tif	30044-6699-10859.tif	1	20	21	no	yes	1	0	5jun18_21may18_KAZ_m2_sp1_19.2_rev.tif	21may18_KAZ_m2	KAZ male	KAZ	male	Musc	M.musculus	5jun18_21may18_KAZ_m2_sp1_19.2_rev.tif_Batch11
Batch11		5jun18_21may18_KAZ_m2_sp1_20_rev.tif	10954-15964-14659.tif	1	20	21	no	yes	0	0	5jun18_21may18_KAZ_m2_sp1_20_rev.tif	21may18_KAZ_m2	KAZ male	KAZ	male	Musc	M.musculus	5jun18_21may18_KAZ_m2_sp1_20_rev.tif_Batch11
Batch11		3jul18_19may18_KAZ_m1_sp1_8_rev.tif	15528-32724-21053.tif	1	20	21	no	yes	0	0	3jul18_19may18_KAZ_m1_sp1_8_rev.tif	19may18_KAZ_m1	KAZ male	KAZ	male	Musc	M.musculus	3jul18_19may18_KAZ_m1_sp1_8_rev.tif_Batch11
Batch11		3jul18_19may18_KAZ_m1_sp1_19_rev.tif	21845-20440-701.tif	1	20	21	no	yes	0	0	3jul18_19may18_KAZ_m1_sp1_19_rev.tif	19may18_KAZ_m1	KAZ male	KAZ	male	Musc	M.musculus	3jul18_19may18_KAZ_m1_sp1_19_rev.tif_Batch11
Batch11		3jul18_19may18_KAZ_m1_sp1_17_rev.tif	19982-18135-29532.tif	1	20	22	no	yes	0	0	3jul18_19may18_KAZ_m1_sp1_17_rev.tif	19may18_KAZ_m1	KAZ male	KAZ	male	Musc	M.musculus	3jul18_19may18_KAZ_m1_sp1_17_rev.tif_Batch11
Batch11		3jul18_19may18_KAZ_m1_sp1_10_rev.tif	31094-659-12705.tif	1	20	22	no	yes	0	0	3jul18_19may18_KAZ_m1_sp1_10_rev.tif	19may18_KAZ_m1	KAZ male	KAZ	male	Musc	M.musculus	3jul18_19may18_KAZ_m1_sp1_10_rev.tif_Batch11
Batch11		3jul18_19may18_KAZ_m1_sp1_24_rev.tif	31192-19471-21366.tif	1	20	22	no	yes	1	0	3jul18_19may18_KAZ_m1_sp1_24_rev.tif	19may18_KAZ_m1	KAZ male	KAZ	male	Musc	M.musculus	3jul18_19may18_KAZ_m1_sp1_24_rev.tif_Batch11
Batch11		5jun18_21may18_KAZ_m2_sp1_19.1_rev.tif	17340-23023-18657.tif	1	20	23	no	yes	0	0	5jun18_21may18_KAZ_m2_sp1_19.1_rev.tif	21may18_KAZ_m2	KAZ male	KAZ	male	Musc	M.musculus	5jun18_21may18_KAZ_m2_sp1_19.1_rev.tif_Batch11
Batch11		5jun18_21may18_KAZ_m2_sp1_2_rev.tif	9233-19951-7731.tif	1	20	23	no	yes	0	0	5jun18_21may18_KAZ_m2_sp1_2_rev.tif	21may18_KAZ_m2	KAZ male	KAZ	male	Musc	M.musculus	5jun18_21may18_KAZ_m2_sp1_2_rev.tif_Batch11
Batch11		3jul18_19may18_KAZ_m1_sp1_21_rev.tif	9431-10613-24360.tif	1	20	28	no	yes	0	0	3jul18_19may18_KAZ_m1_sp1_21_rev.tif	19may18_KAZ_m1	KAZ male	KAZ	male	Musc	M.musculus	3jul18_19may18_KAZ_m1_sp1_21_rev.tif_Batch11
Batch16		6aug19_10jul19_KAZ_m4_sp1_7.2_rev.tif	1472-17424-13432.tif	1	20	27	no	yes	0	0	6aug19_10jul19_KAZ_m4_sp1_7.2_rev.tif	10jul19_KAZ_m4	KAZ male	KAZ	male	Musc	M.musculus	6aug19_10jul19_KAZ_m4_sp1_7.2_rev.tif_Batch16
Batch16		6aug19_10jul19_KAZ_m4_sp1_6.5_rev.tif	14065-18627-27434.tif	1	20	24	no	yes	0	0	6aug19_10jul19_KAZ_m4_sp1_6.5_rev.tif	10jul19_KAZ_m4	KAZ male	KAZ	male	Musc	M.musculus	6aug19_10jul19_KAZ_m4_sp1_6.5_rev.tif_Batch16
Batch16		6aug19_10jul19_KAZ_m4_sp1_5.2_rev.tif	11096-15132-490.tif	1	20	23	no	yes	0	0	6aug19_10jul19_KAZ_m4_sp1_5.2_rev.tif	10jul19_KAZ_m4	KAZ male	KAZ	male	Musc	M.musculus	6aug19_10jul19_KAZ_m4_sp1_5.2_rev.tif_Batch16
Batch16		6aug19_10jul19_KAZ_m4_sp1_19_rev.tif	26204-3598-1897.tif	1	20	21	no	yes	1	0	6aug19_10jul19_KAZ_m4_sp1_19_rev.tif	10jul19_KAZ_m4	KAZ male	KAZ	male	Musc	M.musculus	6aug19_10jul19_KAZ_m4_sp1_19_rev.tif_Batch16
Batch16		6aug19_10jul19_KAZ_m4_sp1_15.1_rev.tif	12821-49-15529.tif	1	20	22	no	yes	0	0	6aug19_10jul19_KAZ_m4_sp1_15.1_rev.tif	10jul19_KAZ_m4	KAZ male	KAZ	male	Musc	M.musculus	6aug19_10jul19_KAZ_m4_sp1_15.1_rev.tif_Batch16
Batch16		6aug19_10jul19_KAZ_m4_sp1_11.2_rev.tif	28708-17158-28763.tif	1	20	21	no	yes	0	0	6aug19_10jul19_KAZ_m4_sp1_11.2_rev.tif	10jul19_KAZ_m4	KAZ male	KAZ	male	Musc	M.musculus	6aug19_10jul19_KAZ_m4_sp1_11.2_rev.tif_Batch16
Batch16		6aug19_10jul19_KAZ_m3_sp1_9_rev.tif	17048-17404-27592.tif	1	20	28	no	yes	0	0	6aug19_10jul19_KAZ_m3_sp1_9_rev.tif	10jul19_KAZ_m3	KAZ male	KAZ	male	Musc	M.musculus	6aug19_10jul19_KAZ_m3_sp1_9_rev.tif_Batch16
Batch16		6aug19_10jul19_KAZ_m3_sp1_2.1_rev.tif	4808-250-5573.tif	1	20	28	no	yes	0	0	6aug19_10jul19_KAZ_m3_sp1_2.1_rev.tif	10jul19_KAZ_m3	KAZ male	KAZ	male	Musc	M.musculus	6aug19_10jul19_KAZ_m3_sp1_2.1_rev.tif_Batch16
Batch16		6aug19_10jul19_KAZ_m3_sp1_11.1_rev.tif	5206-9890-10741.tif	1	20	31	no	yes	0	0	6aug19_10jul19_KAZ_m3_sp1_11.1_rev.tif	10jul19_KAZ_m3	KAZ male	KAZ	male	Musc	M.musculus	6aug19_10jul19_KAZ_m3_sp1_11.1_rev.tif_Batch16
Batch16		6aug19_10jul19_KAZ_m3_sp1_1.2_rev.tif	20298-8009-5275.tif	1	20	32	no	yes	0	0	6aug19_10jul19_KAZ_m3_sp1_1.2_rev.tif	10jul19_KAZ_m3	KAZ male	KAZ	male	Musc	M.musculus	6aug19_10jul19_KAZ_m3_sp1_1.2_rev.tif_Batch16
Batch16		6aug19_10jul19_KAZ_m2_sp1_9.2_rev.tif	22152-12721-19226.tif	1	20	27	no	no	0	0	6aug19_10jul19_KAZ_m2_sp1_9.2_rev.tif	10jul19_KAZ_m2	KAZ male	KAZ	male	Musc	M.musculus	6aug19_10jul19_KAZ_m2_sp1_9.2_rev.tif_Batch16
Batch16		6aug19_10jul19_KAZ_m2_sp1_9.1_rev.tif	18132-21070-19377.tif	1	20	28	no	yes	0	0	6aug19_10jul19_KAZ_m2_sp1_9.1_rev.tif	10jul19_KAZ_m2	KAZ male	KAZ	male	Musc	M.musculus	6aug19_10jul19_KAZ_m2_sp1_9.1_rev.tif_Batch16
Batch16		6aug19_10jul19_KAZ_m2_sp1_8_rev.tif	8362-14801-583.tif	1	20	27	no	yes	0	0	6aug19_10jul19_KAZ_m2_sp1_8_rev.tif	10jul19_KAZ_m2	KAZ male	KAZ	male	Musc	M.musculus	6aug19_10jul19_KAZ_m2_sp1_8_rev.tif_Batch16
Batch16		6aug19_10jul19_KAZ_m2_sp1_6_rev.tif	30383-3390-28590.tif	1	20	31	no	yes	0	0	6aug19_10jul19_KAZ_m2_sp1_6_rev.tif	10jul19_KAZ_m2	KAZ male	KAZ	male	Musc	M.musculus	6aug19_10jul19_KAZ_m2_sp1_6_rev.tif_Batch16
Batch16		6aug19_10jul19_KAZ_m2_sp1_3.2_rev.tif	29909-8743-30050.tif	1	20	27	no	yes	0	0	6aug19_10jul19_KAZ_m2_sp1_3.2_rev.tif	10jul19_KAZ_m2	KAZ male	KAZ	male	Musc	M.musculus	6aug19_10jul19_KAZ_m2_sp1_3.2_rev.tif_Batch16
Batch16		6aug19_10jul19_KAZ_m2_sp1_2.1_rev.tif	29288-10333-27777.tif	1	20	28	no	yes	0	0	6aug19_10jul19_KAZ_m2_sp1_2.1_rev.tif	10jul19_KAZ_m2	KAZ male	KAZ	male	Musc	M.musculus	6aug19_10jul19_KAZ_m2_sp1_2.1_rev.tif_Batch16
Batch16		6aug19_10jul19_KAZ_m2_sp1_15.4_rev.tif	12888-29077-30317.tif	1	20	28	no	yes	0	0	6aug19_10jul19_KAZ_m2_sp1_15.4_rev.tif	10jul19_KAZ_m2	KAZ male	KAZ	male	Musc	M.musculus	6aug19_10jul19_KAZ_m2_sp1_15.4_rev.tif_Batch16
Batch16		6aug19_10jul19_KAZ_m2_sp1_14.2_rev.tif	10574-9228-27632.tif	1	20	25	no	yes	0	0	6aug19_10jul19_KAZ_m2_sp1_14.2_rev.tif	10jul19_KAZ_m2	KAZ male	KAZ	male	Musc	M.musculus	6aug19_10jul19_KAZ_m2_sp1_14.2_rev.tif_Batch16
batch10		12jan17_4jan17_LEW_f1_sp1_15_rev.tif	18984-18757-11938.tif	1	20	22	no		2	0	12jan17_4jan17_LEW_f1_sp1_15_rev.tif	4jan17_LEW_f1	LEW female	LEW	female	Dom	M.musculus	12jan17_4jan17_LEW_f1_sp1_15_rev.tif_batch10
batch10		15mar17_13jan17_LEW_f3_sp1_26_rev.tif	1015-4591-26401.tif	1	20	25	no		0	0	15mar17_13jan17_LEW_f3_sp1_26_rev.tif	13jan17_LEW_f3	LEW female	LEW	female	Dom	M.musculus	15mar17_13jan17_LEW_f3_sp1_26_rev.tif_batch10
batch10		20mar17_13jan17_LEW_f2_sp1_8_rev.tif	23203-13588-10984.tif	1	20	29	no		0	0	20mar17_13jan17_LEW_f2_sp1_8_rev.tif	13jan17_LEW_f2	LEW female	LEW	female	Dom	M.musculus	20mar17_13jan17_LEW_f2_sp1_8_rev.tif_batch10
batch10		15mar17_13jan17_LEW_f3_sp1_15_rev.tif	7190-12812-985.tif	1	20	34	no		0	0	15mar17_13jan17_LEW_f3_sp1_15_rev.tif	13jan17_LEW_f3	LEW female	LEW	female	Dom	M.musculus	15mar17_13jan17_LEW_f3_sp1_15_rev.tif_batch10
batch10		8feb17_4jan17_LEW_f1_sp1_4_rev.tif	14311-32262-25750.tif	1	20	38	no		0	0	8feb17_4jan17_LEW_f1_sp1_4_rev.tif	4jan17_LEW_f1	LEW female	LEW	female	Dom	M.musculus	8feb17_4jan17_LEW_f1_sp1_4_rev.tif_batch10
batch10		8feb17_4jan17_LEW_f1_sp1_3_rev.tif	29797-21874-21069.tif	1	20	46	no		0	0	8feb17_4jan17_LEW_f1_sp1_3_rev.tif	4jan17_LEW_f1	LEW female	LEW	female	Dom	M.musculus	8feb17_4jan17_LEW_f1_sp1_3_rev.tif_batch10
batch12		9apr18_1feb18_LEW_f1_sp1_4_rev.tif	8154-22766-24462.tif	1	20	26	no		0	4	9apr18_1feb18_LEW_f1_sp1_4_rev.tif	1feb18_LEW_f1	LEW female	LEW	female	Dom	M.musculus	9apr18_1feb18_LEW_f1_sp1_4_rev.tif_batch12
Batch4		12jan17_4jan17_LEW_f1_sp1_14_rev.tif	28767-30820-24780.tif	1	20	30			0	0	12jan17_4jan17_LEW_f1_sp1_14_rev.tif	4jan17_LEW_f1	LEW female	LEW	female	Dom	M.musculus	12jan17_4jan17_LEW_f1_sp1_14_rev.tif_Batch4
Batch4		12jan17_4jan17_LEW_f1_sp1_18_rev.tif	88-5556-17123.tif	1	20	34			0	0	12jan17_4jan17_LEW_f1_sp1_18_rev.tif	4jan17_LEW_f1	LEW female	LEW	female	Dom	M.musculus	12jan17_4jan17_LEW_f1_sp1_18_rev.tif_Batch4
Batch4		12jan17_4jan17_LEW_f1_sp1_26_rev.tif	26987-29839-17607.tif	1	20	38			0	0	12jan17_4jan17_LEW_f1_sp1_26_rev.tif	4jan17_LEW_f1	LEW female	LEW	female	Dom	M.musculus	12jan17_4jan17_LEW_f1_sp1_26_rev.tif_Batch4
Batch4		12jan17_4jan17_LEW_f1_sp1_3_rev.tif	24996-66-18155.tif	1	20	27			1	0	12jan17_4jan17_LEW_f1_sp1_3_rev.tif	4jan17_LEW_f1	LEW female	LEW	female	Dom	M.musculus	12jan17_4jan17_LEW_f1_sp1_3_rev.tif_Batch4
Batch4		12jan17_4jan17_LEW_f1_sp1_31_rev.tif	17828-15551-9783.tif	1	20	25			0	0	12jan17_4jan17_LEW_f1_sp1_31_rev.tif	4jan17_LEW_f1	LEW female	LEW	female	Dom	M.musculus	12jan17_4jan17_LEW_f1_sp1_31_rev.tif_Batch4
Batch4		12jan17_4jan17_LEW_f1_sp1_6_rev.tif	21717-26903-1856.tif	1	20	22			1	0	12jan17_4jan17_LEW_f1_sp1_6_rev.tif	4jan17_LEW_f1	LEW female	LEW	female	Dom	M.musculus	12jan17_4jan17_LEW_f1_sp1_6_rev.tif_Batch4
Batch4		12jan17_4jan17_LEW_f3_sp1_11_rev.tif	25906-25710-18429.tif	1	20	31			0	0	12jan17_4jan17_LEW_f3_sp1_11_rev.tif	4jan17_LEW_f3	LEW female	LEW	female	Dom	M.musculus	12jan17_4jan17_LEW_f3_sp1_11_rev.tif_Batch4
Batch4		12jan17_4jan17_LEW_f3_sp1_8_rev.tif	16922-20043-22712.tif	1	20	31			1	0	12jan17_4jan17_LEW_f3_sp1_8_rev.tif	4jan17_LEW_f3	LEW female	LEW	female	Dom	M.musculus	12jan17_4jan17_LEW_f3_sp1_8_rev.tif_Batch4
Batch4		19jan17_4jan17_LEW_f6_sp1_23_rev.tif	26011-21187-17507.tif	1	20	24			1	1	19jan17_4jan17_LEW_f6_sp1_23_rev.tif	4jan17_LEW_f6	LEW female	LEW	female	Dom	M.musculus	19jan17_4jan17_LEW_f6_sp1_23_rev.tif_Batch4
Batch4		19jan17_4jan17_LEW_f6_sp1_26_rev.tif	6278-13447-16994.tif	1	20	26			0	1	19jan17_4jan17_LEW_f6_sp1_26_rev.tif	4jan17_LEW_f6	LEW female	LEW	female	Dom	M.musculus	19jan17_4jan17_LEW_f6_sp1_26_rev.tif_Batch4
Batch4		19jan17_4jan17_LEW_f6_sp1_39_rev.tif	7851-1824-29938.tif	1	20	33			0	0	19jan17_4jan17_LEW_f6_sp1_39_rev.tif	4jan17_LEW_f6	LEW female	LEW	female	Dom	M.musculus	19jan17_4jan17_LEW_f6_sp1_39_rev.tif_Batch4
Batch4		19jan17_4jan17_LEW_f6_sp1_45_rev.tif	8955-2314-4202.tif	1	20	21			1	0	19jan17_4jan17_LEW_f6_sp1_45_rev.tif	4jan17_LEW_f6	LEW female	LEW	female	Dom	M.musculus	19jan17_4jan17_LEW_f6_sp1_45_rev.tif_Batch4
Batch4		19jan17_4jan17_LEW_f7_sp1_27_rev.tif	17900-31283-19963.tif	1	20	26			1	0	19jan17_4jan17_LEW_f7_sp1_27_rev.tif	4jan17_LEW_f7	LEW female	LEW	female	Dom	M.musculus	19jan17_4jan17_LEW_f7_sp1_27_rev.tif_Batch4
Batch5		8feb17_4jan17_LEW_f1_sp1_5_rev.tif	31560-31027-12026.tif	1	20	31	no		0	0	8feb17_4jan17_LEW_f1_sp1_5_rev.tif	4jan17_LEW_f1	LEW female	LEW	female	Dom	M.musculus	8feb17_4jan17_LEW_f1_sp1_5_rev.tif_Batch5
Batch5		14jul17_4jan17_LEW_f6_sp1_2_rev.tif	13997-32679-420.tif	1	20	23	no		2	0	14jul17_4jan17_LEW_f6_sp1_2_rev.tif	4jan17_LEW_f6	LEW female	LEW	female	Dom	M.musculus	14jul17_4jan17_LEW_f6_sp1_2_rev.tif_Batch5
batch8		5aug17_14jul17_LEW_f1_sp1_3_rev.tif	5396-8930-22695.tif	1	20	30	no		0	0	5aug17_14jul17_LEW_f1_sp1_3_rev.tif	14jul17_LEW_f1	LEW female	LEW	female	Dom	M.musculus	5aug17_14jul17_LEW_f1_sp1_3_rev.tif_batch8
Batch3		30nov16_13nov16_LEW_m1_sp1_7_rev.tif	30564-28521-14840.tif	1	20	25	n	y	0	0	30nov16_13nov16_LEW_m1_sp1_7_rev.tif	13nov16_LEW_m1	LEW male	LEW	male	Dom	M.musculus	30nov16_13nov16_LEW_m1_sp1_7_rev.tif_Batch3
Batch3		4feb17_20dec16_LEW_m3_sp1_15_rev.tif	163-10620-18340.tif	1	20	28		y	1	0	4feb17_20dec16_LEW_m3_sp1_15_rev.tif	20dec16_LEW_m3	LEW male	LEW	male	Dom	M.musculus	4feb17_20dec16_LEW_m3_sp1_15_rev.tif_Batch3
Batch3		4feb17_20dec16_LEW_m3_sp1_21_rev.tif	8911-25925-5846.tif	1	20	20		y	1	0	4feb17_20dec16_LEW_m3_sp1_21_rev.tif	20dec16_LEW_m3	LEW male	LEW	male	Dom	M.musculus	4feb17_20dec16_LEW_m3_sp1_21_rev.tif_Batch3
Batch3		4feb17_20dec16_LEW_m3_sp1_22_rev.tif	32441-23290-11620.tif	1	20	23		y	0	0	4feb17_20dec16_LEW_m3_sp1_22_rev.tif	20dec16_LEW_m3	LEW male	LEW	male	Dom	M.musculus	4feb17_20dec16_LEW_m3_sp1_22_rev.tif_Batch3
Batch3		4feb17_4jan17_LEW_m1_sp1_2_rev.tif	4911-16131-27693.tif	1	20	24		y	1	0	4feb17_4jan17_LEW_m1_sp1_2_rev.tif	4jan17_LEW_m1	LEW male	LEW	male	Dom	M.musculus	4feb17_4jan17_LEW_m1_sp1_2_rev.tif_Batch3
Batch3		4feb17_4jan17_LEW_m1_sp1_3.2_rev.tif	28742-21090-30981.tif	1	20	28	n	y	0	0	4feb17_4jan17_LEW_m1_sp1_3.2_rev.tif	4jan17_LEW_m1	LEW male	LEW	male	Dom	M.musculus	4feb17_4jan17_LEW_m1_sp1_3.2_rev.tif_Batch3
Batch3		7feb17_20dec16_LEW_m2_sp1_14_rev.tif	27428-8451-11522.tif	1	20	21	n	yes	0	0	7feb17_20dec16_LEW_m2_sp1_14_rev.tif	20dec16_LEW_m2	LEW male	LEW	male	Dom	M.musculus	7feb17_20dec16_LEW_m2_sp1_14_rev.tif_Batch3
Batch3		7feb17_20dec16_LEW_m2_sp1_25_rev.tif	22996-28399-31277.tif	1	20	24		y	0	0	7feb17_20dec16_LEW_m2_sp1_25_rev.tif	20dec16_LEW_m2	LEW male	LEW	male	Dom	M.musculus	7feb17_20dec16_LEW_m2_sp1_25_rev.tif_Batch3
Batch3		7feb17_20dec16_LEW_m2_sp1_7_rev.tif	22906-26220-3351.tif	1	20	28		y	0	0	7feb17_20dec16_LEW_m2_sp1_7_rev.tif	20dec16_LEW_m2	LEW male	LEW	male	Dom	M.musculus	7feb17_20dec16_LEW_m2_sp1_7_rev.tif_Batch3
Batch3		7feb17_20dec16_LEW_m2_sp1_8_rev.tif	13121-10796-8546.tif	1	20	25		y	0	0	7feb17_20dec16_LEW_m2_sp1_8_rev.tif	20dec16_LEW_m2	LEW male	LEW	male	Dom	M.musculus	7feb17_20dec16_LEW_m2_sp1_8_rev.tif_Batch3
Batch6		3aug17_8may17_LEW_m2_sp1_32_rev.tif	29370-2535-7591.tif	1	20	21	no		1	0	3aug17_8may17_LEW_m2_sp1_32_rev.tif	8may17_LEW_m2	LEW male	LEW	male	Dom	M.musculus	3aug17_8may17_LEW_m2_sp1_32_rev.tif_Batch6
Batch6		9may17_4jan17_LEW_m1_sp1_11_rev.tif	30372-23031-12986.tif	1	20	22	no		0	0	9may17_4jan17_LEW_m1_sp1_11_rev.tif	4jan17_LEW_m1	LEW male	LEW	male	Dom	M.musculus	9may17_4jan17_LEW_m1_sp1_11_rev.tif_Batch6
Batch6		2jul17_20dec16_LEW_m3_sp1_14_rev.tif	30853-15365-4188.tif	1	20	23	yes		0	0	2jul17_20dec16_LEW_m3_sp1_14_rev.tif	20dec16_LEW_m3	LEW male	LEW	male	Dom	M.musculus	2jul17_20dec16_LEW_m3_sp1_14_rev.tif_Batch6
Batch6		2jul17_20dec16_LEW_m3_sp1_13_rev.tif	11959-19815-4283.tif	1	20	26	no		0	0	2jul17_20dec16_LEW_m3_sp1_13_rev.tif	20dec16_LEW_m3	LEW male	LEW	male	Dom	M.musculus	2jul17_20dec16_LEW_m3_sp1_13_rev.tif_Batch6
Batch6		2jul17_20dec16_LEW_m3_sp1_17_rev.tif	14748-30849-23507.tif	1	20	26	no		0	0	2jul17_20dec16_LEW_m3_sp1_17_rev.tif	20dec16_LEW_m3	LEW male	LEW	male	Dom	M.musculus	2jul17_20dec16_LEW_m3_sp1_17_rev.tif_Batch6
Batch6		9may17_4jan17_LEW_m1_sp1_16_rev.tif	13841-25202-4367.tif	1	20	27	no		1	0	9may17_4jan17_LEW_m1_sp1_16_rev.tif	4jan17_LEW_m1	LEW male	LEW	male	Dom	M.musculus	9may17_4jan17_LEW_m1_sp1_16_rev.tif_Batch6
Batch6		9may17_4jan17_LEW_m1_sp1_20_rev.tif	32712-20388-16329.tif	1	20	27	no		0	0	9may17_4jan17_LEW_m1_sp1_20_rev.tif	4jan17_LEW_m1	LEW male	LEW	male	Dom	M.musculus	9may17_4jan17_LEW_m1_sp1_20_rev.tif_Batch6
Batch6		9may17_4jan17_LEW_m1_sp1_14_rev.tif	22938-2413-2815.tif	1	20	27	yes		0	0	9may17_4jan17_LEW_m1_sp1_14_rev.tif	4jan17_LEW_m1	LEW male	LEW	male	Dom	M.musculus	9may17_4jan17_LEW_m1_sp1_14_rev.tif_Batch6
Batch6		3aug17_8may17_LEW_m2_sp1_20_rev.tif	4631-5319-20094.tif	1	20	28	no		0	0	3aug17_8may17_LEW_m2_sp1_20_rev.tif	8may17_LEW_m2	LEW male	LEW	male	Dom	M.musculus	3aug17_8may17_LEW_m2_sp1_20_rev.tif_Batch6
Batch6		3aug17_8may17_LEW_m2_sp1_3_rev.tif	6140-12664-20649.tif	1	20	28	no		0	0	3aug17_8may17_LEW_m2_sp1_3_rev.tif	8may17_LEW_m2	LEW male	LEW	male	Dom	M.musculus	3aug17_8may17_LEW_m2_sp1_3_rev.tif_Batch6
Batch9		6mar18_1feb18_LEW_m1_sp1_21.2_rev.tif	12399-6959-20262.tif	1	20	20	no	yes	0	0	6mar18_1feb18_LEW_m1_sp1_21.2_rev.tif	1feb18_LEW_m1	LEW male	LEW	male	Dom	M.musculus	6mar18_1feb18_LEW_m1_sp1_21.2_rev.tif_Batch9
Batch11		9jun18_8may17_LEW_m1_sp1_7_rev.tif	13826-9200-17240.tif	1	20	20	yes	yes	2	2	9jun18_8may17_LEW_m1_sp1_7_rev.tif	8may17_LEW_m1	LEW male	LEW	male	Dom	M.musculus	9jun18_8may17_LEW_m1_sp1_7_rev.tif_Batch11
Batch11		21jun18_18feb18_LEW_m3_sp2_14_rev.tif	17303-21351-12494.tif	1	20	21	yes	yes	0	0	21jun18_18feb18_LEW_m3_sp2_14_rev.tif	18feb18_LEW_m3	LEW male	LEW	male	Dom	M.musculus	21jun18_18feb18_LEW_m3_sp2_14_rev.tif_Batch11
Batch11		9jun18_8may17_LEW_m1_sp1_11_rev.tif	9798-14155-27279.tif	1	20	22	no	yes	1	0	9jun18_8may17_LEW_m1_sp1_11_rev.tif	8may17_LEW_m1	LEW male	LEW	male	Dom	M.musculus	9jun18_8may17_LEW_m1_sp1_11_rev.tif_Batch11
Batch11		9jun18_8may17_LEW_m1_sp1_10_rev.tif	32761-13557-24886.tif	1	20	24	no	yes	0	0	9jun18_8may17_LEW_m1_sp1_10_rev.tif	8may17_LEW_m1	LEW male	LEW	male	Dom	M.musculus	9jun18_8may17_LEW_m1_sp1_10_rev.tif_Batch11
Batch11		21jun18_18feb18_LEW_m3_sp2_15_rev.tif	16966-24646-24765.tif	1	20	26	no	yes		0	21jun18_18feb18_LEW_m3_sp2_15_rev.tif	18feb18_LEW_m3	LEW male	LEW	male	Dom	M.musculus	21jun18_18feb18_LEW_m3_sp2_15_rev.tif_Batch11
Batch11		9jun18_8may17_LEW_m1_sp1_9_rev.tif	31475-25806-17285.tif	1	20	27	no	yes	0	0	9jun18_8may17_LEW_m1_sp1_9_rev.tif	8may17_LEW_m1	LEW male	LEW	male	Dom	M.musculus	9jun18_8may17_LEW_m1_sp1_9_rev.tif_Batch11
Batch11		9jun18_8may17_LEW_m1_sp1_16_rev.tif	8800-23628-3161.tif	1	20	27	yes	yes	0	0	9jun18_8may17_LEW_m1_sp1_16_rev.tif	8may17_LEW_m1	LEW male	LEW	male	Dom	M.musculus	9jun18_8may17_LEW_m1_sp1_16_rev.tif_Batch11
Batch18		6mar18_1feb18_LEW_m1_sp1_11_rev.tif	19739-25188-25929.tif	1	20	23	no	yes	0	0	6mar18_1feb18_LEW_m1_sp1_11_rev.tif	1feb18_LEW_m1	LEW male	LEW	male	Dom	M.musculus	6mar18_1feb18_LEW_m1_sp1_11_rev.tif_Batch18
Batch18		6mar18_1feb18_LEW_m1_sp1_14.1_rev.tif	29772-8715-30313.tif	1	20	25	no	yes	0	0	6mar18_1feb18_LEW_m1_sp1_14.1_rev.tif	1feb18_LEW_m1	LEW male	LEW	male	Dom	M.musculus	6mar18_1feb18_LEW_m1_sp1_14.1_rev.tif_Batch18
Batch18		6mar18_1feb18_LEW_m1_sp1_21.3_rev.tif	27397-24688-15048.tif	1	20	26	no	no	0	0	6mar18_1feb18_LEW_m1_sp1_21.3_rev.tif	1feb18_LEW_m1	LEW male	LEW	male	Dom	M.musculus	6mar18_1feb18_LEW_m1_sp1_21.3_rev.tif_Batch18
Batch15		9jan19_27oct18_MOLF_m2_sp1_5.1_rev.tif	17008-9233-1375.tif	1	20	23	no	yes	0	0	9jan19_27oct18_MOLF_m2_sp1_5.1_rev.tif	27oct18_MOLF_m2	MOLF male	MOLF	male	Mol	M.musculus	9jan19_27oct18_MOLF_m2_sp1_5.1_rev.tif_Batch15
Batch15		18jul19_1mar19_MOLF_m1_sp1_8.2_rev.tif	20880-17088-3971.tif	1	20	23	no	yes	0	0	18jul19_1mar19_MOLF_m1_sp1_8.2_rev.tif	1mar19_MOLF_m1	MOLF male	MOLF	male	Mol	M.musculus	18jul19_1mar19_MOLF_m1_sp1_8.2_rev.tif_Batch15
Batch15		9jan19_27oct18_MOLF_m2_sp1_29_rev.tif	13205-25785-23040.tif	1	20	24	no	yes	0	0	9jan19_27oct18_MOLF_m2_sp1_29_rev.tif	27oct18_MOLF_m2	MOLF male	MOLF	male	Mol	M.musculus	9jan19_27oct18_MOLF_m2_sp1_29_rev.tif_Batch15
Batch15		9jan19_27oct18_MOLF_m2_sp1_22.1_rev.tif	24097-20688-21664.tif	1	20	24	no	yes	0	0	9jan19_27oct18_MOLF_m2_sp1_22.1_rev.tif	27oct18_MOLF_m2	MOLF male	MOLF	male	Mol	M.musculus	9jan19_27oct18_MOLF_m2_sp1_22.1_rev.tif_Batch15
Batch15		18jul19_1mar19_MOLF_m1_sp1_23.2_rev.tif	7657-11530-28991.tif	1	20	26	no	yes	0	0	18jul19_1mar19_MOLF_m1_sp1_23.2_rev.tif	1mar19_MOLF_m1	MOLF male	MOLF	male	Mol	M.musculus	18jul19_1mar19_MOLF_m1_sp1_23.2_rev.tif_Batch15
Batch15		18jul19_1mar19_MOLF_m1_sp1_14.1_rev.tif	14847-10847-20388.tif	1	20	28	no	yes	0	0	18jul19_1mar19_MOLF_m1_sp1_14.1_rev.tif	1mar19_MOLF_m1	MOLF male	MOLF	male	Mol	M.musculus	18jul19_1mar19_MOLF_m1_sp1_14.1_rev.tif_Batch15
Batch16		2aug19_28sep18_MOLF_m2_sp1_8_rev.tif	28936-13411-7901.tif	1	20	24	no	yes	0	0	2aug19_28sep18_MOLF_m2_sp1_8_rev.tif	28sep18_MOLF_m2	MOLF male	MOLF	male	Mol	M.musculus	2aug19_28sep18_MOLF_m2_sp1_8_rev.tif_Batch16
Batch16		2aug19_28sep18_MOLF_m2_sp1_2_rev.tif	29648-11660-19389.tif	1	20	27	no	yes	0	0	2aug19_28sep18_MOLF_m2_sp1_2_rev.tif	28sep18_MOLF_m2	MOLF male	MOLF	male	Mol	M.musculus	2aug19_28sep18_MOLF_m2_sp1_2_rev.tif_Batch16
batch10		24jan18_31dec17_MSM_f3_sp1_17_rev.tif	19688-32684-2452.tif	1	20	24	no		0	0	24jan18_31dec17_MSM_f3_sp1_17_rev.tif	31dec17_MSM_f3	MSM female	MSM	female	Mol	M.musculus	24jan18_31dec17_MSM_f3_sp1_17_rev.tif_batch10
batch10		26jan18_31dec17_MSM_f5_sp1_17_rev.tif	891-9555-4113.tif	1	20	25	no		0	0	26jan18_31dec17_MSM_f5_sp1_17_rev.tif	31dec17_MSM_f5	MSM female	MSM	female	Mol	M.musculus	26jan18_31dec17_MSM_f5_sp1_17_rev.tif_batch10
batch10		26jan18_31dec17_MSM_f4_sp1_13_rev.tif	620-22335-1407.tif	1	20	27	no		0	0	26jan18_31dec17_MSM_f4_sp1_13_rev.tif	31dec17_MSM_f4	MSM female	MSM	female	Mol	M.musculus	26jan18_31dec17_MSM_f4_sp1_13_rev.tif_batch10
batch10		26jan18_31dec17_MSM_f5_sp1_16_rev.tif	6334-27243-22228.tif	1	20	28	no		0	0	26jan18_31dec17_MSM_f5_sp1_16_rev.tif	31dec17_MSM_f5	MSM female	MSM	female	Mol	M.musculus	26jan18_31dec17_MSM_f5_sp1_16_rev.tif_batch10
batch10		26jan18_31dec17_MSM_f5_sp1_4_rev.tif	1615-5995-18017.tif	1	20	32	no		0	0	26jan18_31dec17_MSM_f5_sp1_4_rev.tif	31dec17_MSM_f5	MSM female	MSM	female	Mol	M.musculus	26jan18_31dec17_MSM_f5_sp1_4_rev.tif_batch10
batch10		26jan18_31dec17_MSM_f4_sp1_3_rev.tif	8211-364-15475.tif	1	20	32	no		1	0	26jan18_31dec17_MSM_f4_sp1_3_rev.tif	31dec17_MSM_f4	MSM female	MSM	female	Mol	M.musculus	26jan18_31dec17_MSM_f4_sp1_3_rev.tif_batch10
batch10		26jan18_31dec17_MSM_f5_sp1_28_rev.tif	13390-8869-11672.tif	1	20	33	no		0	0	26jan18_31dec17_MSM_f5_sp1_28_rev.tif	31dec17_MSM_f5	MSM female	MSM	female	Mol	M.musculus	26jan18_31dec17_MSM_f5_sp1_28_rev.tif_batch10
batch10		26jan18_31dec17_MSM_f5_sp1_25_rev.tif	9922-26372-29344.tif	1	20	34	no		0	0	26jan18_31dec17_MSM_f5_sp1_25_rev.tif	31dec17_MSM_f5	MSM female	MSM	female	Mol	M.musculus	26jan18_31dec17_MSM_f5_sp1_25_rev.tif_batch10
batch10		26jan18_31dec17_MSM_f5_sp1_29_rev.tif	24651-3391-14384.tif	1	20	35	no		0	0	26jan18_31dec17_MSM_f5_sp1_29_rev.tif	31dec17_MSM_f5	MSM female	MSM	female	Mol	M.musculus	26jan18_31dec17_MSM_f5_sp1_29_rev.tif_batch10
batch10		26jan18_31dec17_MSM_f5_sp1_18_rev.tif	18424-15636-14266.tif	1	20	35	no		0	1	26jan18_31dec17_MSM_f5_sp1_18_rev.tif	31dec17_MSM_f5	MSM female	MSM	female	Mol	M.musculus	26jan18_31dec17_MSM_f5_sp1_18_rev.tif_batch10
batch10		26jan18_31dec17_MSM_f5_sp1_27_rev.tif	15400-5312-15745.tif	1	20	36	no		0	0	26jan18_31dec17_MSM_f5_sp1_27_rev.tif	31dec17_MSM_f5	MSM female	MSM	female	Mol	M.musculus	26jan18_31dec17_MSM_f5_sp1_27_rev.tif_batch10
Batch4		22nov16_13nov16_MSM_f2_sp1_1_rev.tif	25118-5241-9539.tif	1	20	24			0	0	22nov16_13nov16_MSM_f2_sp1_1_rev.tif	13nov16_MSM_f2	MSM female	MSM	female	Mol	M.musculus	22nov16_13nov16_MSM_f2_sp1_1_rev.tif_Batch4
Batch4		22nov16_13nov16_MSM_f2_sp1_20_rev.tif	5382-21069-23543.tif	1	20	37			0	0	22nov16_13nov16_MSM_f2_sp1_20_rev.tif	13nov16_MSM_f2	MSM female	MSM	female	Mol	M.musculus	22nov16_13nov16_MSM_f2_sp1_20_rev.tif_Batch4
Batch4		22nov16_30sep16_MSM_f2_sp1_12_rev.tif	5373-16294-25516.tif	1	20	26			0	0	22nov16_30sep16_MSM_f2_sp1_12_rev.tif	30sep16_MSM_f2	MSM female	MSM	female	Mol	M.musculus	22nov16_30sep16_MSM_f2_sp1_12_rev.tif_Batch4
Batch4		22nov16_30sep16_MSM_f2_sp1_19_rev.tif	30201-20184-18220.tif	1	20	31			0	0	22nov16_30sep16_MSM_f2_sp1_19_rev.tif	30sep16_MSM_f2	MSM female	MSM	female	Mol	M.musculus	22nov16_30sep16_MSM_f2_sp1_19_rev.tif_Batch4
Batch4		22nov16_30sep16_MSM_f2_sp1_21_rev.tif	3997-26686-17503.tif	1	20	26			0	0	22nov16_30sep16_MSM_f2_sp1_21_rev.tif	30sep16_MSM_f2	MSM female	MSM	female	Mol	M.musculus	22nov16_30sep16_MSM_f2_sp1_21_rev.tif_Batch4
Batch4		22nov16_30sep16_MSM_f2_sp1_4_rev.tif	29962-54-29165.tif	1	20	28			0	0	22nov16_30sep16_MSM_f2_sp1_4_rev.tif	30sep16_MSM_f2	MSM female	MSM	female	Mol	M.musculus	22nov16_30sep16_MSM_f2_sp1_4_rev.tif_Batch4
Batch4		22nov16_30sep16_MSM_f2_sp1_6_rev.tif	4240-6476-27028.tif	1	20	26			0	0	22nov16_30sep16_MSM_f2_sp1_6_rev.tif	30sep16_MSM_f2	MSM female	MSM	female	Mol	M.musculus	22nov16_30sep16_MSM_f2_sp1_6_rev.tif_Batch4
Batch4		22nov16_30sep16_MSM_f2_sp1_7_rev.tif	17913-25345-26482.tif	1	20	26			0	0	22nov16_30sep16_MSM_f2_sp1_7_rev.tif	30sep16_MSM_f2	MSM female	MSM	female	Mol	M.musculus	22nov16_30sep16_MSM_f2_sp1_7_rev.tif_Batch4
Batch4		22nov16_30sep16_MSM_f2_sp1_8.2_rev.tif	12968-27203-13344.tif	1	20	27			0	0	22nov16_30sep16_MSM_f2_sp1_8.2_rev.tif	30sep16_MSM_f2	MSM female	MSM	female	Mol	M.musculus	22nov16_30sep16_MSM_f2_sp1_8.2_rev.tif_Batch4
Batch4		29nov16_13nov16_MSM_f1_sp1_12_rev.tif	223-23701-13822.tif	1	20	31			0	0	29nov16_13nov16_MSM_f1_sp1_12_rev.tif	13nov16_MSM_f1	MSM female	MSM	female	Mol	M.musculus	29nov16_13nov16_MSM_f1_sp1_12_rev.tif_Batch4
Batch4		29nov16_13nov16_MSM_f1_sp1_15_rev.tif	2290-15198-14860.tif	1	20	25			0	0	29nov16_13nov16_MSM_f1_sp1_15_rev.tif	13nov16_MSM_f1	MSM female	MSM	female	Mol	M.musculus	29nov16_13nov16_MSM_f1_sp1_15_rev.tif_Batch4
Batch4		29nov16_13nov16_MSM_f1_sp1_19_rev.tif	29714-29135-3081.tif	1	20	30			0	0	29nov16_13nov16_MSM_f1_sp1_19_rev.tif	13nov16_MSM_f1	MSM female	MSM	female	Mol	M.musculus	29nov16_13nov16_MSM_f1_sp1_19_rev.tif_Batch4
Batch4		29nov16_13nov16_MSM_f1_sp1_20_rev.tif	24290-25434-28505.tif	1	20	29			0	0	29nov16_13nov16_MSM_f1_sp1_20_rev.tif	13nov16_MSM_f1	MSM female	MSM	female	Mol	M.musculus	29nov16_13nov16_MSM_f1_sp1_20_rev.tif_Batch4
Batch4		29nov16_13nov16_MSM_f1_sp1_21_rev.tif	32723-28401-17958.tif	1	20	28			0	0	29nov16_13nov16_MSM_f1_sp1_21_rev.tif	13nov16_MSM_f1	MSM female	MSM	female	Mol	M.musculus	29nov16_13nov16_MSM_f1_sp1_21_rev.tif_Batch4
Batch4		29nov16_13nov16_MSM_f1_sp1_22_rev.tif	80-18978-7336.tif	1	20	31			0	0	29nov16_13nov16_MSM_f1_sp1_22_rev.tif	13nov16_MSM_f1	MSM female	MSM	female	Mol	M.musculus	29nov16_13nov16_MSM_f1_sp1_22_rev.tif_Batch4
Batch4		29nov16_13nov16_MSM_f1_sp1_24.1_rev.tif	1433-9283-16438.tif	1	20	28			0	0	29nov16_13nov16_MSM_f1_sp1_24.1_rev.tif	13nov16_MSM_f1	MSM female	MSM	female	Mol	M.musculus	29nov16_13nov16_MSM_f1_sp1_24.1_rev.tif_Batch4
Batch4		29nov16_13nov16_MSM_f1_sp1_29_rev.tif	27139-29851-9227.tif	1	20	31			0	1	29nov16_13nov16_MSM_f1_sp1_29_rev.tif	13nov16_MSM_f1	MSM female	MSM	female	Mol	M.musculus	29nov16_13nov16_MSM_f1_sp1_29_rev.tif_Batch4
Batch4		29nov16_13nov16_MSM_f1_sp1_3_rev.tif	14608-8224-14628.tif	1	20	32			0	0	29nov16_13nov16_MSM_f1_sp1_3_rev.tif	13nov16_MSM_f1	MSM female	MSM	female	Mol	M.musculus	29nov16_13nov16_MSM_f1_sp1_3_rev.tif_Batch4
Batch4		29nov16_13nov16_MSM_f1_sp1_6_rev.tif	12655-12294-32599.tif	1	20	32			0	0	29nov16_13nov16_MSM_f1_sp1_6_rev.tif	13nov16_MSM_f1	MSM female	MSM	female	Mol	M.musculus	29nov16_13nov16_MSM_f1_sp1_6_rev.tif_Batch4
Batch4		29nov16_13nov16_MSM_f1_sp1_7_rev.tif	9430-23546-23004.tif	1	20	33			0	1	29nov16_13nov16_MSM_f1_sp1_7_rev.tif	13nov16_MSM_f1	MSM female	MSM	female	Mol	M.musculus	29nov16_13nov16_MSM_f1_sp1_7_rev.tif_Batch4
Batch5		5aug17_14jul17_MSM_f1_sp1_24_rev.tif	12778-22209-20376.tif	1	20	29	no		0	0	5aug17_14jul17_MSM_f1_sp1_24_rev.tif	14jul17_MSM_f1	MSM female	MSM	female	Mol	M.musculus	5aug17_14jul17_MSM_f1_sp1_24_rev.tif_Batch5
Batch5		5aug17_14jul17_MSM_f1_sp1_15_rev.tif	5966-9699-18628.tif	1	20	31	no		0	2	5aug17_14jul17_MSM_f1_sp1_15_rev.tif	14jul17_MSM_f1	MSM female	MSM	female	Mol	M.musculus	5aug17_14jul17_MSM_f1_sp1_15_rev.tif_Batch5
Batch5		5aug17_14jul17_MSM_f1_sp1_17_rev.tif	24487-25825-9488.tif	1	20	22	no		1	0	5aug17_14jul17_MSM_f1_sp1_17_rev.tif	14jul17_MSM_f1	MSM female	MSM	female	Mol	M.musculus	5aug17_14jul17_MSM_f1_sp1_17_rev.tif_Batch5
batch8		21nov17_16nov17_MSM_f3_sp1_12_rev.tif	10141-12476-11321.tif	1	20	28	no		0	0	21nov17_16nov17_MSM_f3_sp1_12_rev.tif	16nov17_MSM_f3	MSM female	MSM	female	Mol	M.musculus	21nov17_16nov17_MSM_f3_sp1_12_rev.tif_batch8
batch8		21nov17_16nov17_MSM_f3_sp1_31_rev.tif	10337-2064-8508.tif	1	20	20	no		0	0	21nov17_16nov17_MSM_f3_sp1_31_rev.tif	16nov17_MSM_f3	MSM female	MSM	female	Mol	M.musculus	21nov17_16nov17_MSM_f3_sp1_31_rev.tif_batch8
batch8		5aug17_14jul17_MSM_f1_sp1_26_rev.tif	10902-20689-6667.tif	1	20	28	no		0	0	5aug17_14jul17_MSM_f1_sp1_26_rev.tif	14jul17_MSM_f1	MSM female	MSM	female	Mol	M.musculus	5aug17_14jul17_MSM_f1_sp1_26_rev.tif_batch8
batch8		21nov17_16nov17_MSM_f3_sp1_11_rev.tif	11494-11483-25694.tif	1	20	33	no		0	0	21nov17_16nov17_MSM_f3_sp1_11_rev.tif	16nov17_MSM_f3	MSM female	MSM	female	Mol	M.musculus	21nov17_16nov17_MSM_f3_sp1_11_rev.tif_batch8
batch8		4dec17_16nov17_MSM_f2_sp1_28.1_rev.tif	11963-23955-23349.tif	1	20	40	no		0	0	4dec17_16nov17_MSM_f2_sp1_28.1_rev.tif	16nov17_MSM_f2	MSM female	MSM	female	Mol	M.musculus	4dec17_16nov17_MSM_f2_sp1_28.1_rev.tif_batch8
batch8		21nov17_16nov17_MSM_f3_sp1_33_rev.tif	1242-17794-565.tif	1	20	31	no		0	3	21nov17_16nov17_MSM_f3_sp1_33_rev.tif	16nov17_MSM_f3	MSM female	MSM	female	Mol	M.musculus	21nov17_16nov17_MSM_f3_sp1_33_rev.tif_batch8
batch8		4dec17_16nov17_MSM_f2_sp1_31_rev.tif	12509-3183-9369.tif	1	20	37	n		0	2	4dec17_16nov17_MSM_f2_sp1_31_rev.tif	16nov17_MSM_f2	MSM female	MSM	female	Mol	M.musculus	4dec17_16nov17_MSM_f2_sp1_31_rev.tif_batch8
batch8		21nov17_16nov17_MSM_f3_sp1_30_rev.tif	25151-16920-12082.tif	1	20	32	no		0	0	21nov17_16nov17_MSM_f3_sp1_30_rev.tif	16nov17_MSM_f3	MSM female	MSM	female	Mol	M.musculus	21nov17_16nov17_MSM_f3_sp1_30_rev.tif_batch8
batch8		4dec17_16nov17_MSM_f2_sp1_1_rev.tif	25179-26297-21552.tif	1	20	35	no		0	0	4dec17_16nov17_MSM_f2_sp1_1_rev.tif	16nov17_MSM_f2	MSM female	MSM	female	Mol	M.musculus	4dec17_16nov17_MSM_f2_sp1_1_rev.tif_batch8
batch8		21nov17_16nov17_MSM_f3_sp1_7_rev.tif	2705-32430-4267.tif	1	20	32	no		0	1	21nov17_16nov17_MSM_f3_sp1_7_rev.tif	16nov17_MSM_f3	MSM female	MSM	female	Mol	M.musculus	21nov17_16nov17_MSM_f3_sp1_7_rev.tif_batch8
batch8		21nov17_16nov17_MSM_f3_sp1_2_rev.tif	27747-31330-23132.tif	1	20	37	no		0	0	21nov17_16nov17_MSM_f3_sp1_2_rev.tif	16nov17_MSM_f3	MSM female	MSM	female	Mol	M.musculus	21nov17_16nov17_MSM_f3_sp1_2_rev.tif_batch8
batch8		4dec17_16nov17_MSM_f2_sp1_36_rev.tif	2900-15204-30311.tif	1	20	27	no		0	0	4dec17_16nov17_MSM_f2_sp1_36_rev.tif	16nov17_MSM_f2	MSM female	MSM	female	Mol	M.musculus	4dec17_16nov17_MSM_f2_sp1_36_rev.tif_batch8
batch8		4dec17_16nov17_MSM_f2_sp1_3_rev.tif	30930-13544-30679.tif	1	20	32	no		0	0	4dec17_16nov17_MSM_f2_sp1_3_rev.tif	16nov17_MSM_f2	MSM female	MSM	female	Mol	M.musculus	4dec17_16nov17_MSM_f2_sp1_3_rev.tif_batch8
batch8		29nov17_16nov17_MSM_f1_sp1_7_rev.tif	32419-18147-12698.tif	1	20	33	no		0	0	29nov17_16nov17_MSM_f1_sp1_7_rev.tif	16nov17_MSM_f1	MSM female	MSM	female	Mol	M.musculus	29nov17_16nov17_MSM_f1_sp1_7_rev.tif_batch8
batch8		21nov17_16nov17_MSM_f3_sp1_26_rev.tif	5127-31648-12342.tif	1	20	36	no		0	2	21nov17_16nov17_MSM_f3_sp1_26_rev.tif	16nov17_MSM_f3	MSM female	MSM	female	Mol	M.musculus	21nov17_16nov17_MSM_f3_sp1_26_rev.tif_batch8
batch8		29nov17_16nov17_MSM_f1_sp1_22_rev.tif	27063-2166-21348.tif	1	20	32	no		1	2	29nov17_16nov17_MSM_f1_sp1_22_rev.tif	16nov17_MSM_f1	MSM female	MSM	female	Mol	M.musculus	29nov17_16nov17_MSM_f1_sp1_22_rev.tif_batch8
Batch1		27oct16_31aug16_MSM_m1_sp1_11_rev.tif	30-4177-2106.tif	1	20	30	no	y	0	0	27oct16_31aug16_MSM_m1_sp1_11_rev.tif	31aug16_MSM_m1	MSM male	MSM	male	Mol	M.musculus	27oct16_31aug16_MSM_m1_sp1_11_rev.tif_Batch1
Batch1		27oct16_31aug16_MSM_m1_sp1_13_rev.tif	15530-28694-25997.tif	1	20	30	no	yes	0	0	27oct16_31aug16_MSM_m1_sp1_13_rev.tif	31aug16_MSM_m1	MSM male	MSM	male	Mol	M.musculus	27oct16_31aug16_MSM_m1_sp1_13_rev.tif_Batch1
Batch1		27oct16_31aug16_MSM_m1_sp1_15.2_rev.tif	1607-29425-28301.tif	1	20	32	no	yes	0	0	27oct16_31aug16_MSM_m1_sp1_15.2_rev.tif	31aug16_MSM_m1	MSM male	MSM	male	Mol	M.musculus	27oct16_31aug16_MSM_m1_sp1_15.2_rev.tif_Batch1
Batch1		27oct16_31aug16_MSM_m1_sp1_17.1_rev.tif	2008-17764-17850.tif	1	20	28	no	yes	1	0	27oct16_31aug16_MSM_m1_sp1_17.1_rev.tif	31aug16_MSM_m1	MSM male	MSM	male	Mol	M.musculus	27oct16_31aug16_MSM_m1_sp1_17.1_rev.tif_Batch1
Batch1		27oct16_31aug16_MSM_m1_sp1_17.2_rev.tif	19836-16600-6157.tif	1	20	30	no	yes	0	0	27oct16_31aug16_MSM_m1_sp1_17.2_rev.tif	31aug16_MSM_m1	MSM male	MSM	male	Mol	M.musculus	27oct16_31aug16_MSM_m1_sp1_17.2_rev.tif_Batch1
Batch1		27oct16_31aug16_MSM_m1_sp1_18_rev.tif	19204-25356-14370.tif	1	20	31	no	yes	0	0	27oct16_31aug16_MSM_m1_sp1_18_rev.tif	31aug16_MSM_m1	MSM male	MSM	male	Mol	M.musculus	27oct16_31aug16_MSM_m1_sp1_18_rev.tif_Batch1
Batch1		27oct16_31aug16_MSM_m1_sp1_25_rev.tif	12293-29602-6147.tif	1	20	34	no	yes			27oct16_31aug16_MSM_m1_sp1_25_rev.tif	31aug16_MSM_m1	MSM male	MSM	male	Mol	M.musculus	27oct16_31aug16_MSM_m1_sp1_25_rev.tif_Batch1
Batch3		29nov16_13nov16_MSM_m2_sp1_13_rev.tif	17627-6773-16019.tif	1	20	33		y	0	0	29nov16_13nov16_MSM_m2_sp1_13_rev.tif	13nov16_MSM_m2	MSM male	MSM	male	Mol	M.musculus	29nov16_13nov16_MSM_m2_sp1_13_rev.tif_Batch3
Batch3		29nov16_13nov16_MSM_m2_sp1_14_rev.tif	9642-28550-26687.tif	1	20	35		yes	0	0	29nov16_13nov16_MSM_m2_sp1_14_rev.tif	13nov16_MSM_m2	MSM male	MSM	male	Mol	M.musculus	29nov16_13nov16_MSM_m2_sp1_14_rev.tif_Batch3
Batch3		29nov16_13nov16_MSM_m2_sp1_5.1_rev.tif	28318-15844-29711.tif	1	20	30	n	y	0	0	29nov16_13nov16_MSM_m2_sp1_5.1_rev.tif	13nov16_MSM_m2	MSM male	MSM	male	Mol	M.musculus	29nov16_13nov16_MSM_m2_sp1_5.1_rev.tif_Batch3
Batch3		29nov16_13nov16_MSM_m2_sp1_7_rev.tif	59-18393-29582.tif	1	20	30		y	0	0	29nov16_13nov16_MSM_m2_sp1_7_rev.tif	13nov16_MSM_m2	MSM male	MSM	male	Mol	M.musculus	29nov16_13nov16_MSM_m2_sp1_7_rev.tif_Batch3
Batch3		30nov16_13nov16_MSM_m1_sp1_11.1_rev.tif	31239-29463-1540.tif	1	20	33	n	y	0	0	30nov16_13nov16_MSM_m1_sp1_11.1_rev.tif	13nov16_MSM_m1	MSM male	MSM	male	Mol	M.musculus	30nov16_13nov16_MSM_m1_sp1_11.1_rev.tif_Batch3
Batch3		30nov16_13nov16_MSM_m1_sp1_25.1_rev.tif	9505-435-24503.tif	1	20	32		y	0	0	30nov16_13nov16_MSM_m1_sp1_25.1_rev.tif	13nov16_MSM_m1	MSM male	MSM	male	Mol	M.musculus	30nov16_13nov16_MSM_m1_sp1_25.1_rev.tif_Batch3
Batch3		30nov16_13nov16_MSM_m1_sp1_6.3_rev.tif	13705-32669-3987.tif	1	20	33		y	0	0	30nov16_13nov16_MSM_m1_sp1_6.3_rev.tif	13nov16_MSM_m1	MSM male	MSM	male	Mol	M.musculus	30nov16_13nov16_MSM_m1_sp1_6.3_rev.tif_Batch3
Batch6		16aug17_5jul17_MSM_m1_sp1_21_rev.tif	10148-21960-17917.tif	1	20	25	no		0	0	16aug17_5jul17_MSM_m1_sp1_21_rev.tif	5jul17_MSM_m1	MSM male	MSM	male	Mol	M.musculus	16aug17_5jul17_MSM_m1_sp1_21_rev.tif_Batch6
Batch6		3aug17_30may17_MSM_m1_sp1_13_rev.tif	26780-7151-18238.tif	1	20	29	no		0	0	3aug17_30may17_MSM_m1_sp1_13_rev.tif	30may17_MSM_m1	MSM male	MSM	male	Mol	M.musculus	3aug17_30may17_MSM_m1_sp1_13_rev.tif_Batch6
Batch6		16aug17_5jul17_MSM_m1_sp1_10_rev.tif	31657-2897-30143.tif	1	20	30	no		0	0	16aug17_5jul17_MSM_m1_sp1_10_rev.tif	5jul17_MSM_m1	MSM male	MSM	male	Mol	M.musculus	16aug17_5jul17_MSM_m1_sp1_10_rev.tif_Batch6
Batch6		16aug17_5jul17_MSM_m1_sp1_3_rev.tif	21045-20465-12938.tif	1	20	31	no		1	0	16aug17_5jul17_MSM_m1_sp1_3_rev.tif	5jul17_MSM_m1	MSM male	MSM	male	Mol	M.musculus	16aug17_5jul17_MSM_m1_sp1_3_rev.tif_Batch6
Batch6		16aug17_5jul17_MSM_m1_sp1_9_rev.tif	9149-16058-4724.tif	1	20	31	no		0	0	16aug17_5jul17_MSM_m1_sp1_9_rev.tif	5jul17_MSM_m1	MSM male	MSM	male	Mol	M.musculus	16aug17_5jul17_MSM_m1_sp1_9_rev.tif_Batch6
Batch6		16aug17_5jul17_MSM_m1_sp1_13_rev.tif	13057-24895-18559.tif	1	20	32	no		0	0	16aug17_5jul17_MSM_m1_sp1_13_rev.tif	5jul17_MSM_m1	MSM male	MSM	male	Mol	M.musculus	16aug17_5jul17_MSM_m1_sp1_13_rev.tif_Batch6
Batch6		16aug17_5jul17_MSM_m1_sp1_8_rev.tif	15406-27416-19061.tif	1	20	32	no		0	0	16aug17_5jul17_MSM_m1_sp1_8_rev.tif	5jul17_MSM_m1	MSM male	MSM	male	Mol	M.musculus	16aug17_5jul17_MSM_m1_sp1_8_rev.tif_Batch6
Batch6		16aug17_5jul17_MSM_m1_sp1_16_rev.tif	11821-10924-7498.tif	1	20	33	no		0	0	16aug17_5jul17_MSM_m1_sp1_16_rev.tif	5jul17_MSM_m1	MSM male	MSM	male	Mol	M.musculus	16aug17_5jul17_MSM_m1_sp1_16_rev.tif_Batch6
Batch6		3aug17_30may17_MSM_m1_sp1_22.2_rev.tif	12972-5725-4572.tif	1	20	33	no		0	0	3aug17_30may17_MSM_m1_sp1_22.2_rev.tif	30may17_MSM_m1	MSM male	MSM	male	Mol	M.musculus	3aug17_30may17_MSM_m1_sp1_22.2_rev.tif_Batch6
Batch6		16aug17_5jul17_MSM_m1_sp1_5_rev.tif	1412-12722-15750.tif	1	20	33	no		1	0	16aug17_5jul17_MSM_m1_sp1_5_rev.tif	5jul17_MSM_m1	MSM male	MSM	male	Mol	M.musculus	16aug17_5jul17_MSM_m1_sp1_5_rev.tif_Batch6
Batch6		3aug17_30may17_MSM_m1_sp1_8_rev.tif	8773-30858-6428.tif	1	20	33	no		0	0	3aug17_30may17_MSM_m1_sp1_8_rev.tif	30may17_MSM_m1	MSM male	MSM	male	Mol	M.musculus	3aug17_30may17_MSM_m1_sp1_8_rev.tif_Batch6
Batch6		16aug17_5jul17_MSM_m1_sp1_11_rev.tif	17972-20940-29579.tif	1	20	34	no		0	0	16aug17_5jul17_MSM_m1_sp1_11_rev.tif	5jul17_MSM_m1	MSM male	MSM	male	Mol	M.musculus	16aug17_5jul17_MSM_m1_sp1_11_rev.tif_Batch6
Batch6		3aug17_30may17_MSM_m1_sp1_30_rev.tif	19739-1631-5992.tif	1	20	34	no		0	0	3aug17_30may17_MSM_m1_sp1_30_rev.tif	30may17_MSM_m1	MSM male	MSM	male	Mol	M.musculus	3aug17_30may17_MSM_m1_sp1_30_rev.tif_Batch6
Batch9		11feb18_1feb18_MSM_m1_sp1_3.2_rev.tif	10504-22425-13190.tif	1	20	31	no	yes	0	0	11feb18_1feb18_MSM_m1_sp1_3.2_rev.tif	1feb18_MSM_m1	MSM male	MSM	male	Mol	M.musculus	11feb18_1feb18_MSM_m1_sp1_3.2_rev.tif_Batch9
Batch9		11feb18_1feb18_MSM_m1_sp1_18_rev.tif	16287-16899-26031.tif	1	20	32	no	yes	0	0	11feb18_1feb18_MSM_m1_sp1_18_rev.tif	1feb18_MSM_m1	MSM male	MSM	male	Mol	M.musculus	11feb18_1feb18_MSM_m1_sp1_18_rev.tif_Batch9
Batch9		11feb18_1feb18_MSM_m1_sp1_13.2_rev.tif	26987-17879-23309.tif	1	20	30	no	yes	0	0	11feb18_1feb18_MSM_m1_sp1_13.2_rev.tif	1feb18_MSM_m1	MSM male	MSM	male	Mol	M.musculus	11feb18_1feb18_MSM_m1_sp1_13.2_rev.tif_Batch9
Batch9		11feb18_1feb18_MSM_m1_sp1_3.1_rev.tif	29698-6247-4954.tif	1	20	29	no	yes	0	0	11feb18_1feb18_MSM_m1_sp1_3.1_rev.tif	1feb18_MSM_m1	MSM male	MSM	male	Mol	M.musculus	11feb18_1feb18_MSM_m1_sp1_3.1_rev.tif_Batch9
Batch9		11feb18_1feb18_MSM_m1_sp1_13.1_rev.tif	4767-2913-9637.tif	1	20	32	no	yes	0	0	11feb18_1feb18_MSM_m1_sp1_13.1_rev.tif	1feb18_MSM_m1	MSM male	MSM	male	Mol	M.musculus	11feb18_1feb18_MSM_m1_sp1_13.1_rev.tif_Batch9
Batch9		11feb18_1feb18_MSM_m1_sp1_8_rev.tif	7872-3070-30883.tif	1	20	35	no	yes	0	0	11feb18_1feb18_MSM_m1_sp1_8_rev.tif	1feb18_MSM_m1	MSM male	MSM	male	Mol	M.musculus	11feb18_1feb18_MSM_m1_sp1_8_rev.tif_Batch9
Batch18		14oct19_4feb19_MSM_m1_sp2_22.4_rev.tif	4078-9723-18594.tif	1	20	29	no	yes	0	0	14oct19_4feb19_MSM_m1_sp2_22.4_rev.tif	4feb19_MSM_m1	MSM male	MSM	male	Mol	M.musculus	14oct19_4feb19_MSM_m1_sp2_22.4_rev.tif_Batch18
Batch18		14oct19_4feb19_MSM_m1_sp2_24_rev.tif	25905-24862-17755.tif	1	20	34	no	no	0	0	14oct19_4feb19_MSM_m1_sp2_24_rev.tif	4feb19_MSM_m1	MSM male	MSM	male	Mol	M.musculus	14oct19_4feb19_MSM_m1_sp2_24_rev.tif_Batch18
Batch18		14oct19_4feb19_MSM_m1_sp2_26_rev.tif	3012-11670-15784.tif	1	20	35	no	yes	0	0	14oct19_4feb19_MSM_m1_sp2_26_rev.tif	4feb19_MSM_m1	MSM male	MSM	male	Mol	M.musculus	14oct19_4feb19_MSM_m1_sp2_26_rev.tif_Batch18
Batch18		14oct19_4feb19_MSM_m1_sp2_28.2_rev.tif	19802-20914-3717.tif	1	20	36	no	yes	0	0	14oct19_4feb19_MSM_m1_sp2_28.2_rev.tif	4feb19_MSM_m1	MSM male	MSM	male	Mol	M.musculus	14oct19_4feb19_MSM_m1_sp2_28.2_rev.tif_Batch18
Batch18		14oct19_4feb19_MSM_m1_sp2_30_rev.tif	28058-14236-29222.tif	1	20	31	no	yes	1	0	14oct19_4feb19_MSM_m1_sp2_30_rev.tif	4feb19_MSM_m1	MSM male	MSM	male	Mol	M.musculus	14oct19_4feb19_MSM_m1_sp2_30_rev.tif_Batch18
Batch18		14oct19_4feb19_MSM_m1_sp2_34.1_rev.tif	32259-7230-26725.tif	1	20	31	no	yes	0	0	14oct19_4feb19_MSM_m1_sp2_34.1_rev.tif	4feb19_MSM_m1	MSM male	MSM	male	Mol	M.musculus	14oct19_4feb19_MSM_m1_sp2_34.1_rev.tif_Batch18
Batch18		14oct19_4feb19_MSM_m1_sp2_35.1_rev.tif	1030-21253-22018.tif	1	20	33	no	yes	0	0	14oct19_4feb19_MSM_m1_sp2_35.1_rev.tif	4feb19_MSM_m1	MSM male	MSM	male	Mol	M.musculus	14oct19_4feb19_MSM_m1_sp2_35.1_rev.tif_Batch18
Batch18		14oct19_4feb19_MSM_m1_sp2_35.2_rev.tif	29200-4099-31813.tif	1	20	33	no	yes	0	0	14oct19_4feb19_MSM_m1_sp2_35.2_rev.tif	4feb19_MSM_m1	MSM male	MSM	male	Mol	M.musculus	14oct19_4feb19_MSM_m1_sp2_35.2_rev.tif_Batch18
Batch18		14oct19_4feb19_MSM_m1_sp2_35.3_rev.tif	20447-3043-29584.tif	1	20	35	no	yes	0	0	14oct19_4feb19_MSM_m1_sp2_35.3_rev.tif	4feb19_MSM_m1	MSM male	MSM	male	Mol	M.musculus	14oct19_4feb19_MSM_m1_sp2_35.3_rev.tif_Batch18
Batch18		14oct19_4feb19_MSM_m1_sp2_35.4_rev.tif	26829-17911-29380.tif	1	20	31	no	yes	0	0	14oct19_4feb19_MSM_m1_sp2_35.4_rev.tif	4feb19_MSM_m1	MSM male	MSM	male	Mol	M.musculus	14oct19_4feb19_MSM_m1_sp2_35.4_rev.tif_Batch18
Batch18		14oct19_4feb19_MSM_m1_sp2_36_rev.tif	28334-18027-9589.tif	1	20	33	no	yes	0	0	14oct19_4feb19_MSM_m1_sp2_36_rev.tif	4feb19_MSM_m1	MSM male	MSM	male	Mol	M.musculus	14oct19_4feb19_MSM_m1_sp2_36_rev.tif_Batch18
Batch18		14oct19_4feb19_MSM_m1_sp2_39.1_rev.tif	375-17968-61.tif	1	20	32	no	yes	0	0	14oct19_4feb19_MSM_m1_sp2_39.1_rev.tif	4feb19_MSM_m1	MSM male	MSM	male	Mol	M.musculus	14oct19_4feb19_MSM_m1_sp2_39.1_rev.tif_Batch18
Batch18		14oct19_4feb19_MSM_m1_sp2_41_rev.tif	21913-13930-28413.tif	1	20	32	no	yes	0	0	14oct19_4feb19_MSM_m1_sp2_41_rev.tif	4feb19_MSM_m1	MSM male	MSM	male	Mol	M.musculus	14oct19_4feb19_MSM_m1_sp2_41_rev.tif_Batch18
Batch18		14oct19_4feb19_MSM_m1_sp2_46.2_rev.tif	28366-16682-10008.tif	1	20	33	no	yes	0	0	14oct19_4feb19_MSM_m1_sp2_46.2_rev.tif	4feb19_MSM_m1	MSM male	MSM	male	Mol	M.musculus	14oct19_4feb19_MSM_m1_sp2_46.2_rev.tif_Batch18
Batch11		22jun18_24aug17_PERC_m1_sp1_27.4_rev.tif	16531-28836-8297.tif	1	20	22	no	yes	0	0	22jun18_24aug17_PERC_m1_sp1_27.4_rev.tif	24aug17_PERC_m1	PERC male	PERC	male	Dom	M.musculus	22jun18_24aug17_PERC_m1_sp1_27.4_rev.tif_Batch11
Batch11		22jun18_24aug17_PERC_m1_sp1_27.2_rev.tif	11012-16566-13345.tif	1	20	23	no	yes	0	0	22jun18_24aug17_PERC_m1_sp1_27.2_rev.tif	24aug17_PERC_m1	PERC male	PERC	male	Dom	M.musculus	22jun18_24aug17_PERC_m1_sp1_27.2_rev.tif_Batch11
Batch11		22jun18_24aug17_PERC_m1_sp1_18.1_rev.tif	20764-6739-12715.tif	1	20	25	no	yes	0	0	22jun18_24aug17_PERC_m1_sp1_18.1_rev.tif	24aug17_PERC_m1	PERC male	PERC	male	Dom	M.musculus	22jun18_24aug17_PERC_m1_sp1_18.1_rev.tif_Batch11
Batch0		9aug15_17apr15_PWD_f2_sp1_12_rev.tif	22594-8992-26182.tif	1	20	33	no	na	0	0	9aug15_17apr15_PWD_f2_sp1_12_rev.tif	17apr15_PWD_f2	PWD female	PWD	female	Musc	M.musculus	9aug15_17apr15_PWD_f2_sp1_12_rev.tif_Batch0
Batch0		9aug15_17apr15_PWD_f2_sp1_23_rev.tif	22452-21966-15945.tif	1	20	26	no	na	0	0	9aug15_17apr15_PWD_f2_sp1_23_rev.tif	17apr15_PWD_f2	PWD female	PWD	female	Musc	M.musculus	9aug15_17apr15_PWD_f2_sp1_23_rev.tif_Batch0
Batch0		9aug15_17apr15_PWD_f2_sp1_31_rev.tif	8416-25374-24579.tif	1	20	26	no	na	0	0	9aug15_17apr15_PWD_f2_sp1_31_rev.tif	17apr15_PWD_f2	PWD female	PWD	female	Musc	M.musculus	9aug15_17apr15_PWD_f2_sp1_31_rev.tif_Batch0
Batch0		2apr15_28feb15_PWD_f1_sp1_8_rev.tif	2048-15452-29709.tif	1	20	28	no	na	0	0	2apr15_28feb15_PWD_f1_sp1_8_rev.tif	28feb15_PWD_f1	PWD female	PWD	female	Musc	M.musculus	2apr15_28feb15_PWD_f1_sp1_8_rev.tif_Batch0
Batch0		9aug15_23apr15_PWD_f2_sp1_11_rev.tif	18103-14440-22025.tif	1	20	23	no	na	0	0	9aug15_23apr15_PWD_f2_sp1_11_rev.tif	23apr15_PWD_f2	PWD female	PWD	female	Musc	M.musculus	9aug15_23apr15_PWD_f2_sp1_11_rev.tif_Batch0
Batch0		8jun15_23apr15_PWD_f2_sp1_16_rev.tif	14659-902-7924.tif	1	20	31	no	na	0	0	8jun15_23apr15_PWD_f2_sp1_16_rev.tif	23apr15_PWD_f2	PWD female	PWD	female	Musc	M.musculus	8jun15_23apr15_PWD_f2_sp1_16_rev.tif_Batch0
Batch0		2apr15_28feb15_PWD_f1_sp1_9_rev.tif	23580-3641-12788.tif	1	20	29	no	na	0	0	2apr15_28feb15_PWD_f1_sp1_9_rev.tif	28feb15_PWD_f1	PWD female	PWD	female	Musc	M.musculus	2apr15_28feb15_PWD_f1_sp1_9_rev.tif_Batch0
Batch0		13mar15_28feb15_PWD_f2_sp1_25_rev.tif	4738-15692-23256.tif	1	20	28	yes	na	0	0	13mar15_28feb15_PWD_f2_sp1_25_rev.tif	28feb15_PWD_f2	PWD female	PWD	female	Musc	M.musculus	13mar15_28feb15_PWD_f2_sp1_25_rev.tif_Batch0
Batch0		13mar15_28feb15_PWD_f2_sp1_46_rev.tif	16981-14405-8076.tif	1	20	23	no	na	0	0	13mar15_28feb15_PWD_f2_sp1_46_rev.tif	28feb15_PWD_f2	PWD female	PWD	female	Musc	M.musculus	13mar15_28feb15_PWD_f2_sp1_46_rev.tif_Batch0
Batch0		11mar15_28feb15_PWD_f3_sp1_14.1_rev.tif	23322-30922-28196.tif	1	20	24	no	na	0	0	11mar15_28feb15_PWD_f3_sp1_14.1_rev.tif	28feb15_PWD_f3	PWD female	PWD	female	Musc	M.musculus	11mar15_28feb15_PWD_f3_sp1_14.1_rev.tif_Batch0
Batch0		11mar15_28feb15_PWD_f3_sp1_24_rev.tif	10199-9710-5960.tif	1	20	26	no	na	0	0	11mar15_28feb15_PWD_f3_sp1_24_rev.tif	28feb15_PWD_f3	PWD female	PWD	female	Musc	M.musculus	11mar15_28feb15_PWD_f3_sp1_24_rev.tif_Batch0
Batch0		2apr15_28feb15_PWD_f3_sp1_4_rev.tif	24461-28773-19879.tif	1	20	31	no	na	0	0	2apr15_28feb15_PWD_f3_sp1_4_rev.tif	28feb15_PWD_f3	PWD female	PWD	female	Musc	M.musculus	2apr15_28feb15_PWD_f3_sp1_4_rev.tif_Batch0
Batch0		7may15_17apr15_PWD_f2_sp1_10_rev.tif	21919-29554-21.tif	1	20	30	yes	na	0	0	7may15_17apr15_PWD_f2_sp1_10_rev.tif	17apr15_PWD_f2	PWD female	PWD	female	Musc	M.musculus	7may15_17apr15_PWD_f2_sp1_10_rev.tif_Batch0
Batch0		30jun15_17apr15_PWD_f3_sp1_25_rev.tif	6101-26932-8431.tif	1	20	24	no	na	1	0	30jun15_17apr15_PWD_f3_sp1_25_rev.tif	17apr15_PWD_f3	PWD female	PWD	female	Musc	M.musculus	30jun15_17apr15_PWD_f3_sp1_25_rev.tif_Batch0
Batch0		5jul15_23apr15_PWD_f1_sp1_5_rev.tif	23617-30192-3057.tif	1	20	24	yes	na	1	0	5jul15_23apr15_PWD_f1_sp1_5_rev.tif	23apr15_PWD_f1	PWD female	PWD	female	Musc	M.musculus	5jul15_23apr15_PWD_f1_sp1_5_rev.tif_Batch0
Batch0		11mar15_28feb15_PWD_f6_sp1_2.2_rev.tif	23082-713-26682.tif	1	20	25	yes	na	0	2	11mar15_28feb15_PWD_f6_sp1_2.2_rev.tif	28feb15_PWD_f6	PWD female	PWD	female	Musc	M.musculus	11mar15_28feb15_PWD_f6_sp1_2.2_rev.tif_Batch0
Batch14		4dec14_8oct14_PWD_f1_sp1_17_rev.tif	7558-16831-31098.tif	1	20	29	no		0	0	4dec14_8oct14_PWD_f1_sp1_17_rev.tif	8oct14_PWD_f1	PWD female	PWD	female	Musc	M.musculus	4dec14_8oct14_PWD_f1_sp1_17_rev.tif_Batch14
Batch14		4dec14_8oct14_PWD_f1_sp1_12_rev.tif	18568-4501-17283.tif	1	20	26	no		0	0	4dec14_8oct14_PWD_f1_sp1_12_rev.tif	8oct14_PWD_f1	PWD female	PWD	female	Musc	M.musculus	4dec14_8oct14_PWD_f1_sp1_12_rev.tif_Batch14
Batch0		22mar15_10mar15_PWD_m1_sp1_1_rev.tif	5595-17316-15211.tif	1	20	32	no	yes	0	0	22mar15_10mar15_PWD_m1_sp1_1_rev.tif	10mar15_PWD_m1	PWD male	PWD	male	Musc	M.musculus	22mar15_10mar15_PWD_m1_sp1_1_rev.tif_Batch0
Batch0		17mar15_10mar15_PWD_m1_sp1_5_rev.tif	14280-11584-10287.tif	1	20	29	no	yes	0	0	17mar15_10mar15_PWD_m1_sp1_5_rev.tif	10mar15_PWD_m1	PWD male	PWD	male	Musc	M.musculus	17mar15_10mar15_PWD_m1_sp1_5_rev.tif_Batch0
Batch0		22mar15_10mar15_PWD_m2_sp1_15_rev.tif	26668-2213-14220.tif	1	20	30	no	yes	0	0	22mar15_10mar15_PWD_m2_sp1_15_rev.tif	10mar15_PWD_m2	PWD male	PWD	male	Musc	M.musculus	22mar15_10mar15_PWD_m2_sp1_15_rev.tif_Batch0
Batch0		22mar15_10mar15_PWD_m2_sp1_5.3_rev.tif	24851-18455-22223.tif	1	20	28	no	yes	0	0	22mar15_10mar15_PWD_m2_sp1_5.3_rev.tif	10mar15_PWD_m2	PWD male	PWD	male	Musc	M.musculus	22mar15_10mar15_PWD_m2_sp1_5.3_rev.tif_Batch0
Batch0		17mar15_10mar15_PWD_m2_sp1_6_rev.tif	3120-30471-8064.tif	1	20	31	no	yes	0	0	17mar15_10mar15_PWD_m2_sp1_6_rev.tif	10mar15_PWD_m2	PWD male	PWD	male	Musc	M.musculus	17mar15_10mar15_PWD_m2_sp1_6_rev.tif_Batch0
Batch0		20jul15_18may15_PWD_m2_sp1_8_rev.tif	20472-20153-17016.tif	1	20	32	no	yes	0	0	20jul15_18may15_PWD_m2_sp1_8_rev.tif	18may15_PWD_m2	PWD male	PWD	male	Musc	M.musculus	20jul15_18may15_PWD_m2_sp1_8_rev.tif_Batch0
Batch0		20jul15_18may15_PWD_m1_sp1_1_rev.tif	10243-32047-52.tif	1	20	31	no	yes	0	0	20jul15_18may15_PWD_m1_sp1_1_rev.tif	18may15_PWD_m1	PWD male	PWD	male	Musc	M.musculus	20jul15_18may15_PWD_m1_sp1_1_rev.tif_Batch0
Batch0		20jul15_18may15_PWD_m1_sp1_10_rev.tif	30771-22627-25037.tif	1	20	27	no	yes	0	0	20jul15_18may15_PWD_m1_sp1_10_rev.tif	18may15_PWD_m1	PWD male	PWD	male	Musc	M.musculus	20jul15_18may15_PWD_m1_sp1_10_rev.tif_Batch0
Batch0		20jul15_18may15_PWD_m1_sp1_15.2_rev.tif	3953-32132-7318.tif	1	20	31	no	yes	0	0	20jul15_18may15_PWD_m1_sp1_15.2_rev.tif	18may15_PWD_m1	PWD male	PWD	male	Musc	M.musculus	20jul15_18may15_PWD_m1_sp1_15.2_rev.tif_Batch0
Batch0		20jul15_18may15_PWD_m1_sp1_16.1_rev.tif	1833-9480-21463.tif	1	20	34	no	yes	0	0	20jul15_18may15_PWD_m1_sp1_16.1_rev.tif	18may15_PWD_m1	PWD male	PWD	male	Musc	M.musculus	20jul15_18may15_PWD_m1_sp1_16.1_rev.tif_Batch0
Batch0		20jul15_18may15_PWD_m1_sp1_2.2_rev.tif	27374-14678-20459.tif	1	20	31	no	yes	0	0	20jul15_18may15_PWD_m1_sp1_2.2_rev.tif	18may15_PWD_m1	PWD male	PWD	male	Musc	M.musculus	20jul15_18may15_PWD_m1_sp1_2.2_rev.tif_Batch0
Batch0		20jul15_18may15_PWD_m1_sp1_23.1_rev.tif	14721-8324-20824.tif	1	20	27	no	1CO	0	0	20jul15_18may15_PWD_m1_sp1_23.1_rev.tif	18may15_PWD_m1	PWD male	PWD	male	Musc	M.musculus	20jul15_18may15_PWD_m1_sp1_23.1_rev.tif_Batch0
Batch0		20jul15_18may15_PWD_m1_sp1_25_rev.tif	31140-2651-19456.tif	1	20	29	no	yes	0	0	20jul15_18may15_PWD_m1_sp1_25_rev.tif	18may15_PWD_m1	PWD male	PWD	male	Musc	M.musculus	20jul15_18may15_PWD_m1_sp1_25_rev.tif_Batch0
Batch0		20jul15_18may15_PWD_m1_sp1_28_rev.tif	20070-18724-2890.tif	1	20	31	no	yes	0	0	20jul15_18may15_PWD_m1_sp1_28_rev.tif	18may15_PWD_m1	PWD male	PWD	male	Musc	M.musculus	20jul15_18may15_PWD_m1_sp1_28_rev.tif_Batch0
Batch0		7mar15_1mar15_PWD_m1_sp4_1.2_rev.tif	232-18593-11095.tif	1	20	28	no	yes	0	0	7mar15_1mar15_PWD_m1_sp4_1.2_rev.tif	1mar15_PWD_m1	PWD male	PWD	male	Musc	M.musculus	7mar15_1mar15_PWD_m1_sp4_1.2_rev.tif_Batch0
Batch0		6mar15_1mar15_PWD_m1_sp4_8_rev.tif	16568-7932-11874.tif	1	20	27	no	yes	0	0	6mar15_1mar15_PWD_m1_sp4_8_rev.tif	1mar15_PWD_m1	PWD male	PWD	male	Musc	M.musculus	6mar15_1mar15_PWD_m1_sp4_8_rev.tif_Batch0
Batch0		8apr15_24mar15_PWD_m2_sp1_11_rev.tif	6140-10942-27080.tif	1	20	27	no	yes	0	0	8apr15_24mar15_PWD_m2_sp1_11_rev.tif	24mar15_PWD_m2	PWD male	PWD	male	Musc	M.musculus	8apr15_24mar15_PWD_m2_sp1_11_rev.tif_Batch0
Batch0		27mar16_6mar16_PWD_m1_sp1_2.1_rev.tif	16534-2418-21492.tif	1	20	27	no	yes	0	0	27mar16_6mar16_PWD_m1_sp1_2.1_rev.tif	6mar16_PWD_m1	PWD male	PWD	male	Musc	M.musculus	27mar16_6mar16_PWD_m1_sp1_2.1_rev.tif_Batch0
Batch0		8apr15_24mar15_PWD_m2_sp1_10.2_rev.tif	21771-450-26589.tif	1	20	31	yes	yes	0	0	8apr15_24mar15_PWD_m2_sp1_10.2_rev.tif	24mar15_PWD_m2	PWD male	PWD	male	Musc	M.musculus	8apr15_24mar15_PWD_m2_sp1_10.2_rev.tif_Batch0
Batch0		20jul15_18may15_PWD_m1_sp1_29.3_rev.tif	26138-25610-7300.tif	1	20	32	yes	yes	0	0	20jul15_18may15_PWD_m1_sp1_29.3_rev.tif	18may15_PWD_m1	PWD male	PWD	male	Musc	M.musculus	20jul15_18may15_PWD_m1_sp1_29.3_rev.tif_Batch0
Batch0		20jul15_18may15_PWD_m1_sp1_4_rev.tif	11994-8785-3654.tif	1	20	30		1 Co	0	0	20jul15_18may15_PWD_m1_sp1_4_rev.tif	18may15_PWD_m1	PWD male	PWD	male	Musc	M.musculus	20jul15_18may15_PWD_m1_sp1_4_rev.tif_Batch0
Batch0		22mar15_10mar15_PWD_m2_sp1_1_rev.tif	4660-20910-19873.tif	1	20	27	no	yes	1	0	22mar15_10mar15_PWD_m2_sp1_1_rev.tif	10mar15_PWD_m2	PWD male	PWD	male	Musc	M.musculus	22mar15_10mar15_PWD_m2_sp1_1_rev.tif_Batch0
Batch0		20jul15_18may15_PWD_m2_sp1_2_rev.tif	1292-10414-13675.tif	1	20	28	no	yes	1	0	20jul15_18may15_PWD_m2_sp1_2_rev.tif	18may15_PWD_m2	PWD male	PWD	male	Musc	M.musculus	20jul15_18may15_PWD_m2_sp1_2_rev.tif_Batch0
Batch0		8apr15_24mar15_PWD_m2_sp1_8_rev.tif	5775-17816-27618.tif	1	20	24	no	yes	1	0	8apr15_24mar15_PWD_m2_sp1_8_rev.tif	24mar15_PWD_m2	PWD male	PWD	male	Musc	M.musculus	8apr15_24mar15_PWD_m2_sp1_8_rev.tif_Batch0
Batch13		7mar15_24sep14_PWD_m1_sp1_13_rev.tif	25437-22623-13447.tif	1	20	25	no	yes	0	0	7mar15_24sep14_PWD_m1_sp1_13_rev.tif	24sep14_PWD_m1	PWD male	PWD	male	Musc	M.musculus	7mar15_24sep14_PWD_m1_sp1_13_rev.tif_Batch13
Batch13		7mar15_24sep14_PWD_m1_sp1_14.2_rev.tif	18658-32346-4310.tif	1	20	23	yes	yes	0	0	7mar15_24sep14_PWD_m1_sp1_14.2_rev.tif	24sep14_PWD_m1	PWD male	PWD	male	Musc	M.musculus	7mar15_24sep14_PWD_m1_sp1_14.2_rev.tif_Batch13
Batch14		10jun19_31may19_SKIVE_f6_sp1_58_rev.tif	11063-1883-28054.tif	1	20	23	no		1	0	10jun19_31may19_SKIVE_f6_sp1_58_rev.tif	31may19_SKIVE_f6	SKIVE female	SKIVE	female	Musc	M.musculus	10jun19_31may19_SKIVE_f6_sp1_58_rev.tif_Batch14
Batch14		10jun19_31may19_SKIVE_f6_sp1_44_rev.tif	6884-23897-29297.tif	1	20	31	no		0	0	10jun19_31may19_SKIVE_f6_sp1_44_rev.tif	31may19_SKIVE_f6	SKIVE female	SKIVE	female	Musc	M.musculus	10jun19_31may19_SKIVE_f6_sp1_44_rev.tif_Batch14
Batch14		10jun19_31may19_SKIVE_f6_sp1_41_rev.tif	9705-30854-20932.tif	1	20	31	no		0	0	10jun19_31may19_SKIVE_f6_sp1_41_rev.tif	31may19_SKIVE_f6	SKIVE female	SKIVE	female	Musc	M.musculus	10jun19_31may19_SKIVE_f6_sp1_41_rev.tif_Batch14
Batch14		10jun19_31may19_SKIVE_f6_sp1_32.1_rev.tif	27879-23530-13643.tif	1	20	22	no		0	0	10jun19_31may19_SKIVE_f6_sp1_32.1_rev.tif	31may19_SKIVE_f6	SKIVE female	SKIVE	female	Musc	M.musculus	10jun19_31may19_SKIVE_f6_sp1_32.1_rev.tif_Batch14
Batch14		10jun19_31may19_SKIVE_f6_sp1_24_rev.tif	11455-23674-3254.tif	1	20	26	no		0	0	10jun19_31may19_SKIVE_f6_sp1_24_rev.tif	31may19_SKIVE_f6	SKIVE female	SKIVE	female	Musc	M.musculus	10jun19_31may19_SKIVE_f6_sp1_24_rev.tif_Batch14
Batch13		5jan19_27oct18_SKIVE_m2_sp1_12_rev.tif	7276-32011-21449.tif	1	20	24	no	yes	0	0	5jan19_27oct18_SKIVE_m2_sp1_12_rev.tif	27oct18_SKIVE_m2	SKIVE male	SKIVE	male	Musc	M.musculus	5jan19_27oct18_SKIVE_m2_sp1_12_rev.tif_Batch13
Batch13		11jan19_27oct18_SKIVE_m1_sp1_12.1_rev.tif	3880-30621-7675.tif	1	20	27	no	yes	0	0	11jan19_27oct18_SKIVE_m1_sp1_12.1_rev.tif	27oct18_SKIVE_m1	SKIVE male	SKIVE	male	Musc	M.musculus	11jan19_27oct18_SKIVE_m1_sp1_12.1_rev.tif_Batch13
Batch13		11jan19_27oct18_SKIVE_m1_sp1_19_rev.tif	32313-16410-5882.tif	1	20	29	no	yes	0	0	11jan19_27oct18_SKIVE_m1_sp1_19_rev.tif	27oct18_SKIVE_m1	SKIVE male	SKIVE	male	Musc	M.musculus	11jan19_27oct18_SKIVE_m1_sp1_19_rev.tif_Batch13
Batch13		5jan19_27oct18_SKIVE_m2_sp1_28_rev.tif	27568-30719-5726.tif	1	20	26	yes (top)	yes	0	0	5jan19_27oct18_SKIVE_m2_sp1_28_rev.tif	27oct18_SKIVE_m2	SKIVE male	SKIVE	male	Musc	M.musculus	5jan19_27oct18_SKIVE_m2_sp1_28_rev.tif_Batch13
Batch13		11jan19_27oct18_SKIVE_m1_sp1_9_rev.tif	25696-10153-22115.tif	1	20	28	no	no	0	0	11jan19_27oct18_SKIVE_m1_sp1_9_rev.tif	27oct18_SKIVE_m1	SKIVE male	SKIVE	male	Musc	M.musculus	11jan19_27oct18_SKIVE_m1_sp1_9_rev.tif_Batch13
Batch13		11jan19_27oct18_SKIVE_m1_sp1_1.1_rev.tif	13426-26419-12213.tif	1	20	29	no	yes	0	0	11jan19_27oct18_SKIVE_m1_sp1_1.1_rev.tif	27oct18_SKIVE_m1	SKIVE male	SKIVE	male	Musc	M.musculus	11jan19_27oct18_SKIVE_m1_sp1_1.1_rev.tif_Batch13
Batch13		11jan19_27oct18_SKIVE_m1_sp1_27_rev.tif	1299-21715-22588.tif	1	20	26	no	yes	0	0	11jan19_27oct18_SKIVE_m1_sp1_27_rev.tif	27oct18_SKIVE_m1	SKIVE male	SKIVE	male	Musc	M.musculus	11jan19_27oct18_SKIVE_m1_sp1_27_rev.tif_Batch13
Batch13		5jan19_27oct18_SKIVE_m2_sp1_13_rev.tif	1199-13776-28003.tif	1	20	27	no	yes	0	0	5jan19_27oct18_SKIVE_m2_sp1_13_rev.tif	27oct18_SKIVE_m2	SKIVE male	SKIVE	male	Musc	M.musculus	5jan19_27oct18_SKIVE_m2_sp1_13_rev.tif_Batch13
Batch15		18jul19_31may19_SKIVE_m2_sp1_25.1_rev.tif	1787-12455-17876.tif	1	20	26	no	yes	0	0	18jul19_31may19_SKIVE_m2_sp1_25.1_rev.tif	31may19_SKIVE_m2	SKIVE male	SKIVE	male	Musc	M.musculus	18jul19_31may19_SKIVE_m2_sp1_25.1_rev.tif_Batch15
Batch15		18jul19_31may19_SKIVE_m2_sp1_23_rev.tif	29026-22988-24321.tif	1	20	26	no	no	0	0	18jul19_31may19_SKIVE_m2_sp1_23_rev.tif	31may19_SKIVE_m2	SKIVE male	SKIVE	male	Musc	M.musculus	18jul19_31may19_SKIVE_m2_sp1_23_rev.tif_Batch15
Batch15		18jul19_31may19_SKIVE_m2_sp1_14_rev.tif	3768-6708-15177.tif	1	20	26	no	yes	0	0	18jul19_31may19_SKIVE_m2_sp1_14_rev.tif	31may19_SKIVE_m2	SKIVE male	SKIVE	male	Musc	M.musculus	18jul19_31may19_SKIVE_m2_sp1_14_rev.tif_Batch15
Batch15		18jul19_31may19_SKIVE_m2_sp1_13.3_rev.tif	10377-4455-23531.tif	1	20	27	no	yes	0	0	18jul19_31may19_SKIVE_m2_sp1_13.3_rev.tif	31may19_SKIVE_m2	SKIVE male	SKIVE	male	Musc	M.musculus	18jul19_31may19_SKIVE_m2_sp1_13.3_rev.tif_Batch15
Batch15		18jul19_31may19_SKIVE_m2_sp1_22.1_rev.tif	11400-25478-1771.tif	1	20	27	no	yes	1	0	18jul19_31may19_SKIVE_m2_sp1_22.1_rev.tif	31may19_SKIVE_m2	SKIVE male	SKIVE	male	Musc	M.musculus	18jul19_31may19_SKIVE_m2_sp1_22.1_rev.tif_Batch15
Batch15		18jul19_31may19_SKIVE_m2_sp1_13.1_rev.tif	16043-17130-972.tif	1	20	27	yes	yes	0	0	18jul19_31may19_SKIVE_m2_sp1_13.1_rev.tif	31may19_SKIVE_m2	SKIVE male	SKIVE	male	Musc	M.musculus	18jul19_31may19_SKIVE_m2_sp1_13.1_rev.tif_Batch15
Batch15		18jul19_31may19_SKIVE_m2_sp1_18_rev.tif	21018-6928-4459.tif	1	20	29	no	yes	0	0	18jul19_31may19_SKIVE_m2_sp1_18_rev.tif	31may19_SKIVE_m2	SKIVE male	SKIVE	male	Musc	M.musculus	18jul19_31may19_SKIVE_m2_sp1_18_rev.tif_Batch15
Batch15		18jul19_31may19_SKIVE_m2_sp1_8_rev.tif	28401-24292-29608.tif	1	20	29	no	yes	0	0	18jul19_31may19_SKIVE_m2_sp1_8_rev.tif	31may19_SKIVE_m2	SKIVE male	SKIVE	male	Musc	M.musculus	18jul19_31may19_SKIVE_m2_sp1_8_rev.tif_Batch15
Batch15		18jul19_31may19_SKIVE_m2_sp1_21.1_rev.tif	15006-26003-17278.tif	1	20	30	no	yes	0	0	18jul19_31may19_SKIVE_m2_sp1_21.1_rev.tif	31may19_SKIVE_m2	SKIVE male	SKIVE	male	Musc	M.musculus	18jul19_31may19_SKIVE_m2_sp1_21.1_rev.tif_Batch15
Batch15		18jul19_31may19_SKIVE_m2_sp1_24_rev.tif	24948-31637-437.tif	1	20	32	no	yes	0	0	18jul19_31may19_SKIVE_m2_sp1_24_rev.tif	31may19_SKIVE_m2	SKIVE male	SKIVE	male	Musc	M.musculus	18jul19_31may19_SKIVE_m2_sp1_24_rev.tif_Batch15
Batch18		12sep19_19aug19_SKIVE_m1_sp1_11.1_rev.tif	2944-147-12965.tif	1	20	32	no	yes	0	0	12sep19_19aug19_SKIVE_m1_sp1_11.1_rev.tif	19aug19_SKIVE_m1	SKIVE male	SKIVE	male	Musc	M.musculus	12sep19_19aug19_SKIVE_m1_sp1_11.1_rev.tif_Batch18
Batch18		12sep19_19aug19_SKIVE_m1_sp1_12_rev.tif	6269-8955-32481.tif	1	20	25	no	yes	0	0	12sep19_19aug19_SKIVE_m1_sp1_12_rev.tif	19aug19_SKIVE_m1	SKIVE male	SKIVE	male	Musc	M.musculus	12sep19_19aug19_SKIVE_m1_sp1_12_rev.tif_Batch18
Batch18		12sep19_19aug19_SKIVE_m1_sp1_13.1_rev.tif	10941-4977-21427.tif	1	20	26	no	yes	0	0	12sep19_19aug19_SKIVE_m1_sp1_13.1_rev.tif	19aug19_SKIVE_m1	SKIVE male	SKIVE	male	Musc	M.musculus	12sep19_19aug19_SKIVE_m1_sp1_13.1_rev.tif_Batch18
Batch18		12sep19_19aug19_SKIVE_m1_sp1_13.2_rev.tif	9795-11584-12850.tif	1	20	25	no	yes	0	0	12sep19_19aug19_SKIVE_m1_sp1_13.2_rev.tif	19aug19_SKIVE_m1	SKIVE male	SKIVE	male	Musc	M.musculus	12sep19_19aug19_SKIVE_m1_sp1_13.2_rev.tif_Batch18
Batch18		12sep19_19aug19_SKIVE_m1_sp1_14_rev.tif	21452-8983-2207.tif	1	20	28	no	yes	0	0	12sep19_19aug19_SKIVE_m1_sp1_14_rev.tif	19aug19_SKIVE_m1	SKIVE male	SKIVE	male	Musc	M.musculus	12sep19_19aug19_SKIVE_m1_sp1_14_rev.tif_Batch18
Batch18		12sep19_19aug19_SKIVE_m1_sp1_15_rev.tif	20159-1378-16097.tif	1	20	29	no	yes	0	0	12sep19_19aug19_SKIVE_m1_sp1_15_rev.tif	19aug19_SKIVE_m1	SKIVE male	SKIVE	male	Musc	M.musculus	12sep19_19aug19_SKIVE_m1_sp1_15_rev.tif_Batch18
Batch18		12sep19_19aug19_SKIVE_m1_sp1_18.1_rev.tif	20707-6994-18133.tif	1	20	29	no	yes	0	0	12sep19_19aug19_SKIVE_m1_sp1_18.1_rev.tif	19aug19_SKIVE_m1	SKIVE male	SKIVE	male	Musc	M.musculus	12sep19_19aug19_SKIVE_m1_sp1_18.1_rev.tif_Batch18
Batch18		12sep19_19aug19_SKIVE_m1_sp1_18.2_rev.tif	16202-21148-6532.tif	1	20	26	no	yes	0	0	12sep19_19aug19_SKIVE_m1_sp1_18.2_rev.tif	19aug19_SKIVE_m1	SKIVE male	SKIVE	male	Musc	M.musculus	12sep19_19aug19_SKIVE_m1_sp1_18.2_rev.tif_Batch18
Batch18		12sep19_19aug19_SKIVE_m1_sp1_19_rev.tif	3255-28158-10306.tif	1	20	31	no	yes	0	0	12sep19_19aug19_SKIVE_m1_sp1_19_rev.tif	19aug19_SKIVE_m1	SKIVE male	SKIVE	male	Musc	M.musculus	12sep19_19aug19_SKIVE_m1_sp1_19_rev.tif_Batch18
Batch18		12sep19_19aug19_SKIVE_m1_sp1_2.1_rev.tif	2784-27573-14420.tif	1	20	25	no	yes	0	0	12sep19_19aug19_SKIVE_m1_sp1_2.1_rev.tif	19aug19_SKIVE_m1	SKIVE male	SKIVE	male	Musc	M.musculus	12sep19_19aug19_SKIVE_m1_sp1_2.1_rev.tif_Batch18
Batch18		12sep19_19aug19_SKIVE_m1_sp1_21_rev.tif	2099-23480-2238.tif	1	20	30	no	yes	0	0	12sep19_19aug19_SKIVE_m1_sp1_21_rev.tif	19aug19_SKIVE_m1	SKIVE male	SKIVE	male	Musc	M.musculus	12sep19_19aug19_SKIVE_m1_sp1_21_rev.tif_Batch18
Batch18		12sep19_19aug19_SKIVE_m1_sp1_23.1_rev.tif	27866-13099-10655.tif	1	20	24	no	yes	0	0	12sep19_19aug19_SKIVE_m1_sp1_23.1_rev.tif	19aug19_SKIVE_m1	SKIVE male	SKIVE	male	Musc	M.musculus	12sep19_19aug19_SKIVE_m1_sp1_23.1_rev.tif_Batch18
Batch18		12sep19_19aug19_SKIVE_m1_sp1_23.2_rev.tif	3901-21479-29708.tif	1	20	22	no	yes	0	0	12sep19_19aug19_SKIVE_m1_sp1_23.2_rev.tif	19aug19_SKIVE_m1	SKIVE male	SKIVE	male	Musc	M.musculus	12sep19_19aug19_SKIVE_m1_sp1_23.2_rev.tif_Batch18
Batch18		12sep19_19aug19_SKIVE_m1_sp1_23.3_rev.tif	7456-18826-16586.tif	1	20	26	yes	yes	0	0	12sep19_19aug19_SKIVE_m1_sp1_23.3_rev.tif	19aug19_SKIVE_m1	SKIVE male	SKIVE	male	Musc	M.musculus	12sep19_19aug19_SKIVE_m1_sp1_23.3_rev.tif_Batch18
Batch18		12sep19_19aug19_SKIVE_m1_sp1_24.1_rev.tif	28803-1114-26196.tif	1	20	28	no	yes	0	0	12sep19_19aug19_SKIVE_m1_sp1_24.1_rev.tif	19aug19_SKIVE_m1	SKIVE male	SKIVE	male	Musc	M.musculus	12sep19_19aug19_SKIVE_m1_sp1_24.1_rev.tif_Batch18
Batch18		12sep19_19aug19_SKIVE_m1_sp1_24.3_rev.tif	27845-16703-27778.tif	1	20	28	no	yes	0	0	12sep19_19aug19_SKIVE_m1_sp1_24.3_rev.tif	19aug19_SKIVE_m1	SKIVE male	SKIVE	male	Musc	M.musculus	12sep19_19aug19_SKIVE_m1_sp1_24.3_rev.tif_Batch18
Batch18		12sep19_19aug19_SKIVE_m1_sp1_25_rev.tif	15186-15628-3471.tif	1	20	27	no	yes	0	0	12sep19_19aug19_SKIVE_m1_sp1_25_rev.tif	19aug19_SKIVE_m1	SKIVE male	SKIVE	male	Musc	M.musculus	12sep19_19aug19_SKIVE_m1_sp1_25_rev.tif_Batch18
Batch18		12sep19_19aug19_SKIVE_m1_sp1_3.1_rev.tif	31331-14976-16716.tif	1	20	26	no	yes	0	0	12sep19_19aug19_SKIVE_m1_sp1_3.1_rev.tif	19aug19_SKIVE_m1	SKIVE male	SKIVE	male	Musc	M.musculus	12sep19_19aug19_SKIVE_m1_sp1_3.1_rev.tif_Batch18
Batch18		12sep19_19aug19_SKIVE_m1_sp1_3.2_rev.tif	1712-23448-5720.tif	1	20	30	no	yes	0	0	12sep19_19aug19_SKIVE_m1_sp1_3.2_rev.tif	19aug19_SKIVE_m1	SKIVE male	SKIVE	male	Musc	M.musculus	12sep19_19aug19_SKIVE_m1_sp1_3.2_rev.tif_Batch18
Batch18		12sep19_19aug19_SKIVE_m1_sp1_4.1_rev.tif	32669-25964-17556.tif	1	20	29	no	yes	0	0	12sep19_19aug19_SKIVE_m1_sp1_4.1_rev.tif	19aug19_SKIVE_m1	SKIVE male	SKIVE	male	Musc	M.musculus	12sep19_19aug19_SKIVE_m1_sp1_4.1_rev.tif_Batch18
Batch18		12sep19_19aug19_SKIVE_m1_sp1_4.2_rev.tif	21777-15024-8642.tif	1	20	29	no	no	0	0	12sep19_19aug19_SKIVE_m1_sp1_4.2_rev.tif	19aug19_SKIVE_m1	SKIVE male	SKIVE	male	Musc	M.musculus	12sep19_19aug19_SKIVE_m1_sp1_4.2_rev.tif_Batch18
Batch18		12sep19_19aug19_SKIVE_m1_sp1_4.3_rev.tif	19758-28596-1458.tif	1	20	25	no	yes	0	0	12sep19_19aug19_SKIVE_m1_sp1_4.3_rev.tif	19aug19_SKIVE_m1	SKIVE male	SKIVE	male	Musc	M.musculus	12sep19_19aug19_SKIVE_m1_sp1_4.3_rev.tif_Batch18
Batch18		12sep19_19aug19_SKIVE_m1_sp1_5.2_rev.tif	20338-25452-12511.tif	1	20	23	no	yes	1	0	12sep19_19aug19_SKIVE_m1_sp1_5.2_rev.tif	19aug19_SKIVE_m1	SKIVE male	SKIVE	male	Musc	M.musculus	12sep19_19aug19_SKIVE_m1_sp1_5.2_rev.tif_Batch18
Batch18		12sep19_19aug19_SKIVE_m1_sp1_5.3_rev.tif	20754-10437-17141.tif	1	20	29	no	yes	0	0	12sep19_19aug19_SKIVE_m1_sp1_5.3_rev.tif	19aug19_SKIVE_m1	SKIVE male	SKIVE	male	Musc	M.musculus	12sep19_19aug19_SKIVE_m1_sp1_5.3_rev.tif_Batch18
Batch18		12sep19_19aug19_SKIVE_m1_sp1_5.5_rev.tif	28777-2812-22017.tif	1	20	25	no	yes	0	0	12sep19_19aug19_SKIVE_m1_sp1_5.5_rev.tif	19aug19_SKIVE_m1	SKIVE male	SKIVE	male	Musc	M.musculus	12sep19_19aug19_SKIVE_m1_sp1_5.5_rev.tif_Batch18
Batch18		12sep19_19aug19_SKIVE_m1_sp1_6.1_rev.tif	7338-10678-5868.tif	1	20	23	no	yes	0	0	12sep19_19aug19_SKIVE_m1_sp1_6.1_rev.tif	19aug19_SKIVE_m1	SKIVE male	SKIVE	male	Musc	M.musculus	12sep19_19aug19_SKIVE_m1_sp1_6.1_rev.tif_Batch18
Batch18		12sep19_19aug19_SKIVE_m1_sp1_8.3_rev.tif	20804-19662-30850.tif	1	20	31	no	yes	0	0	12sep19_19aug19_SKIVE_m1_sp1_8.3_rev.tif	19aug19_SKIVE_m1	SKIVE male	SKIVE	male	Musc	M.musculus	12sep19_19aug19_SKIVE_m1_sp1_8.3_rev.tif_Batch18
Batch18		12sep19_19aug19_SKIVE_m1_sp1_9.2_rev.tif	919-20485-11948.tif	1	20	29	no	yes	1	0	12sep19_19aug19_SKIVE_m1_sp1_9.2_rev.tif	19aug19_SKIVE_m1	SKIVE male	SKIVE	male	Musc	M.musculus	12sep19_19aug19_SKIVE_m1_sp1_9.2_rev.tif_Batch18
Batch18		12sep19_19aug19_SKIVE_m1_sp1_9.3_rev.tif	12499-21051-12244.tif	1	20	26	no	no	0	0	12sep19_19aug19_SKIVE_m1_sp1_9.3_rev.tif	19aug19_SKIVE_m1	SKIVE male	SKIVE	male	Musc	M.musculus	12sep19_19aug19_SKIVE_m1_sp1_9.3_rev.tif_Batch18
Batch18		12sep19_19aug19_SKIVE_m1_sp1_9.4_rev.tif	25926-24364-21497.tif	1	20	28	no	yes	0	0	12sep19_19aug19_SKIVE_m1_sp1_9.4_rev.tif	19aug19_SKIVE_m1	SKIVE male	SKIVE	male	Musc	M.musculus	12sep19_19aug19_SKIVE_m1_sp1_9.4_rev.tif_Batch18
Batch18		12sep19_31may19_SKIVE_m1_sp1_1_rev.tif	27631-17374-6881.tif	1	20	25	no	yes	0	0	12sep19_31may19_SKIVE_m1_sp1_1_rev.tif	31may19_SKIVE_m1	SKIVE male	SKIVE	male	Musc	M.musculus	12sep19_31may19_SKIVE_m1_sp1_1_rev.tif_Batch18
Batch18		12sep19_31may19_SKIVE_m1_sp1_12.3_rev.tif	15933-6678-6530.tif	1	20	24	no	yes	2	0	12sep19_31may19_SKIVE_m1_sp1_12.3_rev.tif	31may19_SKIVE_m1	SKIVE male	SKIVE	male	Musc	M.musculus	12sep19_31may19_SKIVE_m1_sp1_12.3_rev.tif_Batch18
Batch18		12sep19_31may19_SKIVE_m1_sp1_13.2_rev.tif	23166-6030-12102.tif	1	20	23	no	yes	1	0	12sep19_31may19_SKIVE_m1_sp1_13.2_rev.tif	31may19_SKIVE_m1	SKIVE male	SKIVE	male	Musc	M.musculus	12sep19_31may19_SKIVE_m1_sp1_13.2_rev.tif_Batch18
Batch18		12sep19_31may19_SKIVE_m1_sp1_16_rev.tif	6933-15896-25756.tif	1	20	28	no	yes	0	0	12sep19_31may19_SKIVE_m1_sp1_16_rev.tif	31may19_SKIVE_m1	SKIVE male	SKIVE	male	Musc	M.musculus	12sep19_31may19_SKIVE_m1_sp1_16_rev.tif_Batch18
Batch18		12sep19_31may19_SKIVE_m1_sp1_17_rev.tif	29976-24442-5383.tif	1	20	24	no	yes	2	0	12sep19_31may19_SKIVE_m1_sp1_17_rev.tif	31may19_SKIVE_m1	SKIVE male	SKIVE	male	Musc	M.musculus	12sep19_31may19_SKIVE_m1_sp1_17_rev.tif_Batch18
Batch18		12sep19_31may19_SKIVE_m1_sp1_23.1_rev.tif	24051-13314-4305.tif	1	20	31	no	yes	0	0	12sep19_31may19_SKIVE_m1_sp1_23.1_rev.tif	31may19_SKIVE_m1	SKIVE male	SKIVE	male	Musc	M.musculus	12sep19_31may19_SKIVE_m1_sp1_23.1_rev.tif_Batch18
Batch18		12sep19_31may19_SKIVE_m1_sp1_24_rev.tif	12471-1096-299.tif	1	20	22	no	yes	0	0	12sep19_31may19_SKIVE_m1_sp1_24_rev.tif	31may19_SKIVE_m1	SKIVE male	SKIVE	male	Musc	M.musculus	12sep19_31may19_SKIVE_m1_sp1_24_rev.tif_Batch18
Batch18		12sep19_31may19_SKIVE_m1_sp1_7.1_rev.tif	24870-18084-23707.tif	1	20	26	no	yes	0	0	12sep19_31may19_SKIVE_m1_sp1_7.1_rev.tif	31may19_SKIVE_m1	SKIVE male	SKIVE	male	Musc	M.musculus	12sep19_31may19_SKIVE_m1_sp1_7.1_rev.tif_Batch18
Batch18		12sep19_31may19_SKIVE_m1_sp1_7.2_rev.tif	29330-26502-26830.tif	1	20	26	no	yes	0	0	12sep19_31may19_SKIVE_m1_sp1_7.2_rev.tif	31may19_SKIVE_m1	SKIVE male	SKIVE	male	Musc	M.musculus	12sep19_31may19_SKIVE_m1_sp1_7.2_rev.tif_Batch18
Batch18		12sep19_31may19_SKIVE_m1_sp1_7.4_rev.tif	10170-10424-17057.tif	1	20	24	no	yes	0	0	12sep19_31may19_SKIVE_m1_sp1_7.4_rev.tif	31may19_SKIVE_m1	SKIVE male	SKIVE	male	Musc	M.musculus	12sep19_31may19_SKIVE_m1_sp1_7.4_rev.tif_Batch18
Batch18		12sep19_31may19_SKIVE_m1_sp1_8.2_rev.tif	20326-85-18496.tif	1	20	26	no	yes	0	0	12sep19_31may19_SKIVE_m1_sp1_8.2_rev.tif	31may19_SKIVE_m1	SKIVE male	SKIVE	male	Musc	M.musculus	12sep19_31may19_SKIVE_m1_sp1_8.2_rev.tif_Batch18
Batch18		18sep19_19aug19_SKIVE_m2_sp1_10_rev.tif	284-21001-5605.tif	1	20	28	no	yes	1	0	18sep19_19aug19_SKIVE_m2_sp1_10_rev.tif	19aug19_SKIVE_m2	SKIVE male	SKIVE	male	Musc	M.musculus	18sep19_19aug19_SKIVE_m2_sp1_10_rev.tif_Batch18
Batch18		18sep19_19aug19_SKIVE_m2_sp1_12_rev.tif	7554-6601-20271.tif	1	20	29	no	yes	0	0	18sep19_19aug19_SKIVE_m2_sp1_12_rev.tif	19aug19_SKIVE_m2	SKIVE male	SKIVE	male	Musc	M.musculus	18sep19_19aug19_SKIVE_m2_sp1_12_rev.tif_Batch18
Batch18		18sep19_19aug19_SKIVE_m2_sp1_16.3_rev.tif	7363-1188-13648.tif	1	20	28	no	yes	0	0	18sep19_19aug19_SKIVE_m2_sp1_16.3_rev.tif	19aug19_SKIVE_m2	SKIVE male	SKIVE	male	Musc	M.musculus	18sep19_19aug19_SKIVE_m2_sp1_16.3_rev.tif_Batch18
Batch18		18sep19_19aug19_SKIVE_m2_sp1_19_rev.tif	9118-32-7037.tif	1	20	26	no	yes	0	0	18sep19_19aug19_SKIVE_m2_sp1_19_rev.tif	19aug19_SKIVE_m2	SKIVE male	SKIVE	male	Musc	M.musculus	18sep19_19aug19_SKIVE_m2_sp1_19_rev.tif_Batch18
Batch18		18sep19_19aug19_SKIVE_m2_sp1_20_rev.tif	29505-4201-8893.tif	1	20	23	no	no	1	0	18sep19_19aug19_SKIVE_m2_sp1_20_rev.tif	19aug19_SKIVE_m2	SKIVE male	SKIVE	male	Musc	M.musculus	18sep19_19aug19_SKIVE_m2_sp1_20_rev.tif_Batch18
Batch18		18sep19_19aug19_SKIVE_m2_sp1_21_rev.tif	2762-8242-14142.tif	1	20	21	no	yes	1	0	18sep19_19aug19_SKIVE_m2_sp1_21_rev.tif	19aug19_SKIVE_m2	SKIVE male	SKIVE	male	Musc	M.musculus	18sep19_19aug19_SKIVE_m2_sp1_21_rev.tif_Batch18
Batch18		18sep19_19aug19_SKIVE_m2_sp1_22.1_rev.tif	27779-7400-7372.tif	1	20	29	no	yes	0	0	18sep19_19aug19_SKIVE_m2_sp1_22.1_rev.tif	19aug19_SKIVE_m2	SKIVE male	SKIVE	male	Musc	M.musculus	18sep19_19aug19_SKIVE_m2_sp1_22.1_rev.tif_Batch18
Batch18		18sep19_19aug19_SKIVE_m2_sp1_23.1_rev.tif	9435-1199-3995.tif	1	20	24	no	yes	1	0	18sep19_19aug19_SKIVE_m2_sp1_23.1_rev.tif	19aug19_SKIVE_m2	SKIVE male	SKIVE	male	Musc	M.musculus	18sep19_19aug19_SKIVE_m2_sp1_23.1_rev.tif_Batch18
Batch18		18sep19_19aug19_SKIVE_m2_sp1_25.1_rev.tif	23733-32149-17079.tif	1	20	22	no	yes	0	0	18sep19_19aug19_SKIVE_m2_sp1_25.1_rev.tif	19aug19_SKIVE_m2	SKIVE male	SKIVE	male	Musc	M.musculus	18sep19_19aug19_SKIVE_m2_sp1_25.1_rev.tif_Batch18
Batch18		18sep19_19aug19_SKIVE_m2_sp1_25.2_rev.tif	18427-5730-15361.tif	1	20	26	no	yes	1	0	18sep19_19aug19_SKIVE_m2_sp1_25.2_rev.tif	19aug19_SKIVE_m2	SKIVE male	SKIVE	male	Musc	M.musculus	18sep19_19aug19_SKIVE_m2_sp1_25.2_rev.tif_Batch18
Batch18		18sep19_19aug19_SKIVE_m2_sp1_25.3_rev.tif	22106-27810-9477.tif	1	20	26	no	yes	0	0	18sep19_19aug19_SKIVE_m2_sp1_25.3_rev.tif	19aug19_SKIVE_m2	SKIVE male	SKIVE	male	Musc	M.musculus	18sep19_19aug19_SKIVE_m2_sp1_25.3_rev.tif_Batch18
Batch18		18sep19_19aug19_SKIVE_m2_sp1_30.1_rev.tif	6107-10660-1024.tif	1	20	24	no	yes	0	0	18sep19_19aug19_SKIVE_m2_sp1_30.1_rev.tif	19aug19_SKIVE_m2	SKIVE male	SKIVE	male	Musc	M.musculus	18sep19_19aug19_SKIVE_m2_sp1_30.1_rev.tif_Batch18
Batch18		18sep19_19aug19_SKIVE_m2_sp1_30.2_rev.tif	23030-11366-28111.tif	1	20	26	no	yes	0	0	18sep19_19aug19_SKIVE_m2_sp1_30.2_rev.tif	19aug19_SKIVE_m2	SKIVE male	SKIVE	male	Musc	M.musculus	18sep19_19aug19_SKIVE_m2_sp1_30.2_rev.tif_Batch18
Batch18		18sep19_19aug19_SKIVE_m2_sp1_5.1_rev.tif	23549-24375-5733.tif	1	20	25	no	yes	0	0	18sep19_19aug19_SKIVE_m2_sp1_5.1_rev.tif	19aug19_SKIVE_m2	SKIVE male	SKIVE	male	Musc	M.musculus	18sep19_19aug19_SKIVE_m2_sp1_5.1_rev.tif_Batch18
Batch18		18sep19_19aug19_SKIVE_m2_sp1_5.3_rev.tif	7737-28372-13364.tif	1	20	24	no	yes	0	0	18sep19_19aug19_SKIVE_m2_sp1_5.3_rev.tif	19aug19_SKIVE_m2	SKIVE male	SKIVE	male	Musc	M.musculus	18sep19_19aug19_SKIVE_m2_sp1_5.3_rev.tif_Batch18
Batch18		18sep19_19aug19_SKIVE_m2_sp1_6_rev.tif	12337-17102-30309.tif	1	20	29	no	yes	0	0	18sep19_19aug19_SKIVE_m2_sp1_6_rev.tif	19aug19_SKIVE_m2	SKIVE male	SKIVE	male	Musc	M.musculus	18sep19_19aug19_SKIVE_m2_sp1_6_rev.tif_Batch18
Batch18		18sep19_19aug19_SKIVE_m2_sp1_7.1_rev.tif	23494-9184-14541.tif	1	20	30	no	yes	0	0	18sep19_19aug19_SKIVE_m2_sp1_7.1_rev.tif	19aug19_SKIVE_m2	SKIVE male	SKIVE	male	Musc	M.musculus	18sep19_19aug19_SKIVE_m2_sp1_7.1_rev.tif_Batch18
Batch18		18sep19_19aug19_SKIVE_m2_sp1_8.4_rev.tif	28982-17297-24784.tif	1	20	26	no	yes	0	0	18sep19_19aug19_SKIVE_m2_sp1_8.4_rev.tif	19aug19_SKIVE_m2	SKIVE male	SKIVE	male	Musc	M.musculus	18sep19_19aug19_SKIVE_m2_sp1_8.4_rev.tif_Batch18
batch10		4feb18_31dec17_SPI_f1_sp1_14_rev.tif	19459-28900-22682.tif	1	20	21	no		1	1	4feb18_31dec17_SPI_f1_sp1_14_rev.tif	31dec17_SPI_f1	SPI female	SPI	female	M.spicilegus	M.spicilegus	4feb18_31dec17_SPI_f1_sp1_14_rev.tif_batch10
batch8		29dec17_4dec17_SPI_f2_sp1_41_rev.tif	14653-14924-17224.tif	1	20	30	n		0	0	29dec17_4dec17_SPI_f2_sp1_41_rev.tif	4dec17_SPI_f2	SPI female	SPI	female	M.spicilegus	M.spicilegus	29dec17_4dec17_SPI_f2_sp1_41_rev.tif_batch8
batch8		29dec17_4dec17_SPI_f2_sp1_23_rev.tif	15426-29981-6195.tif	1	20	27	no		0	0	29dec17_4dec17_SPI_f2_sp1_23_rev.tif	4dec17_SPI_f2	SPI female	SPI	female	M.spicilegus	M.spicilegus	29dec17_4dec17_SPI_f2_sp1_23_rev.tif_batch8
batch8		29dec17_4dec17_SPI_f2_sp1_37_rev.tif	18279-8517-24170.tif	1	20	31	no		0	4	29dec17_4dec17_SPI_f2_sp1_37_rev.tif	4dec17_SPI_f2	SPI female	SPI	female	M.spicilegus	M.spicilegus	29dec17_4dec17_SPI_f2_sp1_37_rev.tif_batch8
batch8		29dec17_4dec17_SPI_f2_sp1_28_rev.tif	1845-27769-7028.tif	1	20	41	no		0	0	29dec17_4dec17_SPI_f2_sp1_28_rev.tif	4dec17_SPI_f2	SPI female	SPI	female	M.spicilegus	M.spicilegus	29dec17_4dec17_SPI_f2_sp1_28_rev.tif_batch8
batch8		29dec17_4dec17_SPI_f2_sp1_12_rev.tif	22330-16691-17064.tif	1	20	27	no		0	1	29dec17_4dec17_SPI_f2_sp1_12_rev.tif	4dec17_SPI_f2	SPI female	SPI	female	M.spicilegus	M.spicilegus	29dec17_4dec17_SPI_f2_sp1_12_rev.tif_batch8
batch8		29dec17_4dec17_SPI_f2_sp1_30_rev.tif	26772-14702-15936.tif	1	20	36	no		0	0	29dec17_4dec17_SPI_f2_sp1_30_rev.tif	4dec17_SPI_f2	SPI female	SPI	female	M.spicilegus	M.spicilegus	29dec17_4dec17_SPI_f2_sp1_30_rev.tif_batch8
batch8		29dec17_4dec17_SPI_f2_sp1_39_rev.tif	3014-2554-9138.tif	1	20	30	n		0	0	29dec17_4dec17_SPI_f2_sp1_39_rev.tif	4dec17_SPI_f2	SPI female	SPI	female	M.spicilegus	M.spicilegus	29dec17_4dec17_SPI_f2_sp1_39_rev.tif_batch8
batch8		29dec17_4dec17_SPI_f2_sp1_36_rev.tif	3637-19853-8691.tif	1	20	35	no		0	0	29dec17_4dec17_SPI_f2_sp1_36_rev.tif	4dec17_SPI_f2	SPI female	SPI	female	M.spicilegus	M.spicilegus	29dec17_4dec17_SPI_f2_sp1_36_rev.tif_batch8
batch8		29dec17_4dec17_SPI_f2_sp1_24_rev.tif	6000-11242-5333.tif	1	20	31	no		0	0	29dec17_4dec17_SPI_f2_sp1_24_rev.tif	4dec17_SPI_f2	SPI female	SPI	female	M.spicilegus	M.spicilegus	29dec17_4dec17_SPI_f2_sp1_24_rev.tif_batch8
Batch7		26dec17_4dec17_SPI_m1_sp1_41.1_rev.tif	9744-22550-27757.tif	1	20	20	n	y	0	0	26dec17_4dec17_SPI_m1_sp1_41.1_rev.tif	4dec17_SPI_m1	SPI male	SPI	male	M.spicilegus	M.spicilegus	26dec17_4dec17_SPI_m1_sp1_41.1_rev.tif_Batch7
Batch7		26dec17_4dec17_SPI_m1_sp1_25_rev.tif	26559-10847-13257.tif	1	20	21	n	y	0	0	26dec17_4dec17_SPI_m1_sp1_25_rev.tif	4dec17_SPI_m1	SPI male	SPI	male	M.spicilegus	M.spicilegus	26dec17_4dec17_SPI_m1_sp1_25_rev.tif_Batch7
Batch7		26dec17_4dec17_SPI_m1_sp1_12_rev.tif	8308-462-12768.tif	1	20	24	no	yes	0	0	26dec17_4dec17_SPI_m1_sp1_12_rev.tif	4dec17_SPI_m1	SPI male	SPI	male	M.spicilegus	M.spicilegus	26dec17_4dec17_SPI_m1_sp1_12_rev.tif_Batch7
Batch7		26dec17_4dec17_SPI_m1_sp1_35.2_rev.tif	20142-25093-7354.tif	1	20	24	n	y	0	0	26dec17_4dec17_SPI_m1_sp1_35.2_rev.tif	4dec17_SPI_m1	SPI male	SPI	male	M.spicilegus	M.spicilegus	26dec17_4dec17_SPI_m1_sp1_35.2_rev.tif_Batch7
Batch7		26dec17_4dec17_SPI_m1_sp1_1_rev.tif	10686-18352-25800.tif	1	20	24	yes	n	0	0	26dec17_4dec17_SPI_m1_sp1_1_rev.tif	4dec17_SPI_m1	SPI male	SPI	male	M.spicilegus	M.spicilegus	26dec17_4dec17_SPI_m1_sp1_1_rev.tif_Batch7
Batch7		4dec17_7nov17_SPI_m1_sp1_31.2_rev.tif	21330-16332-31564.tif	1	20	25	n	y	0	0	4dec17_7nov17_SPI_m1_sp1_31.2_rev.tif	7nov17_SPI_m1	SPI male	SPI	male	M.spicilegus	M.spicilegus	4dec17_7nov17_SPI_m1_sp1_31.2_rev.tif_Batch7
Batch7		26dec17_4dec17_SPI_m1_sp1_13_rev.tif	2172-26273-8955.tif	1	20	25	no	yes	0	0	26dec17_4dec17_SPI_m1_sp1_13_rev.tif	4dec17_SPI_m1	SPI male	SPI	male	M.spicilegus	M.spicilegus	26dec17_4dec17_SPI_m1_sp1_13_rev.tif_Batch7
Batch7		26dec17_4dec17_SPI_m1_sp1_18_rev.tif	5369-18825-12861.tif	1	20	25	no	yes	0	0	26dec17_4dec17_SPI_m1_sp1_18_rev.tif	4dec17_SPI_m1	SPI male	SPI	male	M.spicilegus	M.spicilegus	26dec17_4dec17_SPI_m1_sp1_18_rev.tif_Batch7
Batch7		26dec17_4dec17_SPI_m1_sp1_8_rev.tif	14738-9566-1445.tif	1	20	25	no	yes	0	0	26dec17_4dec17_SPI_m1_sp1_8_rev.tif	4dec17_SPI_m1	SPI male	SPI	male	M.spicilegus	M.spicilegus	26dec17_4dec17_SPI_m1_sp1_8_rev.tif_Batch7
Batch7		4dec17_7nov17_SPI_m1_sp1_10_rev.tif	2428-28227-7019.tif	1	20	26	no	yes	0	0	4dec17_7nov17_SPI_m1_sp1_10_rev.tif	7nov17_SPI_m1	SPI male	SPI	male	M.spicilegus	M.spicilegus	4dec17_7nov17_SPI_m1_sp1_10_rev.tif_Batch7
Batch7		26dec17_4dec17_SPI_m1_sp1_10_rev.tif	30120-22563-15914.tif	1	20	26	no	yes	0	0	26dec17_4dec17_SPI_m1_sp1_10_rev.tif	4dec17_SPI_m1	SPI male	SPI	male	M.spicilegus	M.spicilegus	26dec17_4dec17_SPI_m1_sp1_10_rev.tif_Batch7
Batch7		4dec17_7nov17_SPI_m1_sp1_2.1_rev.tif	3696-15407-15854.tif	1	20	27	no	yes	0	0	4dec17_7nov17_SPI_m1_sp1_2.1_rev.tif	7nov17_SPI_m1	SPI male	SPI	male	M.spicilegus	M.spicilegus	4dec17_7nov17_SPI_m1_sp1_2.1_rev.tif_Batch7
Batch7		4dec17_7nov17_SPI_m1_sp1_27_rev.tif	7554-25853-6838.tif	1	20	27	no	yes	0	0	4dec17_7nov17_SPI_m1_sp1_27_rev.tif	7nov17_SPI_m1	SPI male	SPI	male	M.spicilegus	M.spicilegus	4dec17_7nov17_SPI_m1_sp1_27_rev.tif_Batch7
Batch7		4dec17_7nov17_SPI_m1_sp1_4_rev.tif	16371-21148-2898.tif	1	20	27	no	yes	0	0	4dec17_7nov17_SPI_m1_sp1_4_rev.tif	7nov17_SPI_m1	SPI male	SPI	male	M.spicilegus	M.spicilegus	4dec17_7nov17_SPI_m1_sp1_4_rev.tif_Batch7
Batch7		26dec17_4dec17_SPI_m1_sp1_16.1_rev.tif	29022-11671-4010.tif	1	20	27	n	y	0	0	26dec17_4dec17_SPI_m1_sp1_16.1_rev.tif	4dec17_SPI_m1	SPI male	SPI	male	M.spicilegus	M.spicilegus	26dec17_4dec17_SPI_m1_sp1_16.1_rev.tif_Batch7
Batch7		4dec17_7nov17_SPI_m1_sp1_2.2_rev.tif	6695-6602-29677.tif	1	20	28	no	yes	0	0	4dec17_7nov17_SPI_m1_sp1_2.2_rev.tif	7nov17_SPI_m1	SPI male	SPI	male	M.spicilegus	M.spicilegus	4dec17_7nov17_SPI_m1_sp1_2.2_rev.tif_Batch7
Batch7		4dec17_7nov17_SPI_m1_sp1_34.2_rev.tif	23890-1891-32129.tif	1	20	28	n	y	0	0	4dec17_7nov17_SPI_m1_sp1_34.2_rev.tif	7nov17_SPI_m1	SPI male	SPI	male	M.spicilegus	M.spicilegus	4dec17_7nov17_SPI_m1_sp1_34.2_rev.tif_Batch7
Batch7		4dec17_7nov17_SPI_m1_sp1_19_rev.tif	22126-8223-17038.tif	1	20	28	n	y	0	0	4dec17_7nov17_SPI_m1_sp1_19_rev.tif	7nov17_SPI_m1	SPI male	SPI	male	M.spicilegus	M.spicilegus	4dec17_7nov17_SPI_m1_sp1_19_rev.tif_Batch7
Batch7		4dec17_7nov17_SPI_m1_sp1_33_rev.tif	31741-8587-28465.tif	1	20	29	no	yes	0	0	4dec17_7nov17_SPI_m1_sp1_33_rev.tif	7nov17_SPI_m1	SPI male	SPI	male	M.spicilegus	M.spicilegus	4dec17_7nov17_SPI_m1_sp1_33_rev.tif_Batch7
Batch7		4dec17_7nov17_SPI_m1_sp1_18_rev.tif	23074-12357-12487.tif	1	20	29	n	y	0	0	4dec17_7nov17_SPI_m1_sp1_18_rev.tif	7nov17_SPI_m1	SPI male	SPI	male	M.spicilegus	M.spicilegus	4dec17_7nov17_SPI_m1_sp1_18_rev.tif_Batch7
Batch7		4dec17_7nov17_SPI_m1_sp1_35.1_rev.tif	17278-31684-15269.tif	1	20	30	n	y	0	0	4dec17_7nov17_SPI_m1_sp1_35.1_rev.tif	7nov17_SPI_m1	SPI male	SPI	male	M.spicilegus	M.spicilegus	4dec17_7nov17_SPI_m1_sp1_35.1_rev.tif_Batch7
Batch7		4dec17_7nov17_SPI_m1_sp1_17_rev.tif	15597-11618-20646.tif	1	20	32	n	y	0	0	4dec17_7nov17_SPI_m1_sp1_17_rev.tif	7nov17_SPI_m1	SPI male	SPI	male	M.spicilegus	M.spicilegus	4dec17_7nov17_SPI_m1_sp1_17_rev.tif_Batch7
Batch15		6jun19_28jun18_SPI_m2_sp1_16.3_rev.tif	4854-20069-386.tif	1	20	22	no	yes	1	0	6jun19_28jun18_SPI_m2_sp1_16.3_rev.tif	28jun18_SPI_m2	SPI male	SPI	male	M.spicilegus	M.spicilegus	6jun19_28jun18_SPI_m2_sp1_16.3_rev.tif_Batch15
Batch15		26sep18_19may18_SPI_m2_sp1_25_rev.tif	9939-18529-359.tif	1	20	28	no	yes	0	0	26sep18_19may18_SPI_m2_sp1_25_rev.tif	19may18_SPI_m2	SPI male	SPI	male	M.spicilegus	M.spicilegus	26sep18_19may18_SPI_m2_sp1_25_rev.tif_Batch15
Batch6		24may17_8may17_SPRET_m1_sp1_34_rev.tif	5463-1445-13739.tif	1	20	22	no		0	0	24may17_8may17_SPRET_m1_sp1_34_rev.tif	8may17_SPRET_m1	SPRET male	SPRET	male	M.spretus	M.spretus	24may17_8may17_SPRET_m1_sp1_34_rev.tif_Batch6
Batch6		24may17_8may17_SPRET_m1_sp1_3_rev.tif	10619-12617-2274.tif	1	20	23	no		0	0	24may17_8may17_SPRET_m1_sp1_3_rev.tif	8may17_SPRET_m1	SPRET male	SPRET	male	M.spretus	M.spretus	24may17_8may17_SPRET_m1_sp1_3_rev.tif_Batch6
Batch6		24may17_8may17_SPRET_m1_sp1_8_rev.tif	223-13530-11410.tif	1	20	23	no		0	0	24may17_8may17_SPRET_m1_sp1_8_rev.tif	8may17_SPRET_m1	SPRET male	SPRET	male	M.spretus	M.spretus	24may17_8may17_SPRET_m1_sp1_8_rev.tif_Batch6
Batch6		24may17_8may17_SPRET_m1_sp1_28_rev.tif	31255-29815-9690.tif	1	20	23	no		0	0	24may17_8may17_SPRET_m1_sp1_28_rev.tif	8may17_SPRET_m1	SPRET male	SPRET	male	M.spretus	M.spretus	24may17_8may17_SPRET_m1_sp1_28_rev.tif_Batch6
Batch6		24may17_8may17_SPRET_m1_sp1_4.1_rev.tif	955-25141-7661.tif	1	20	23	yes		0	0	24may17_8may17_SPRET_m1_sp1_4.1_rev.tif	8may17_SPRET_m1	SPRET male	SPRET	male	M.spretus	M.spretus	24may17_8may17_SPRET_m1_sp1_4.1_rev.tif_Batch6
Batch6		24may17_8may17_SPRET_m1_sp1_16_rev.tif	7406-7942-16919.tif	1	20	26	no		0	0	24may17_8may17_SPRET_m1_sp1_16_rev.tif	8may17_SPRET_m1	SPRET male	SPRET	male	M.spretus	M.spretus	24may17_8may17_SPRET_m1_sp1_16_rev.tif_Batch6
Batch6		24may17_8may17_SPRET_m1_sp1_24.1_rev.tif	979-17544-19503.tif	1	20	26	no		0	0	24may17_8may17_SPRET_m1_sp1_24.1_rev.tif	8may17_SPRET_m1	SPRET male	SPRET	male	M.spretus	M.spretus	24may17_8may17_SPRET_m1_sp1_24.1_rev.tif_Batch6
Batch6		24may17_8may17_SPRET_m1_sp1_38_rev.tif	1000-17627-11195.tif	1	20	27	no		0	0	24may17_8may17_SPRET_m1_sp1_38_rev.tif	8may17_SPRET_m1	SPRET male	SPRET	male	M.spretus	M.spretus	24may17_8may17_SPRET_m1_sp1_38_rev.tif_Batch6
Batch6		24may17_8may17_SPRET_m1_sp1_19_rev.tif	29460-32744-10449.tif	1	20	27	no		0	0	24may17_8may17_SPRET_m1_sp1_19_rev.tif	8may17_SPRET_m1	SPRET male	SPRET	male	M.spretus	M.spretus	24may17_8may17_SPRET_m1_sp1_19_rev.tif_Batch6
Batch6		24may17_8may17_SPRET_m1_sp1_10_rev.tif	7583-19396-27222.tif	1	20	27	no		0	0	24may17_8may17_SPRET_m1_sp1_10_rev.tif	8may17_SPRET_m1	SPRET male	SPRET	male	M.spretus	M.spretus	24may17_8may17_SPRET_m1_sp1_10_rev.tif_Batch6
Batch7		10oct17_5jul17_SPRET_m1_sp1_29_rev.tif	24977-24425-13606.tif	1	20	27	n	yes	0	0	10oct17_5jul17_SPRET_m1_sp1_29_rev.tif	5jul17_SPRET_m1	SPRET male	SPRET	male	M.spretus	M.spretus	10oct17_5jul17_SPRET_m1_sp1_29_rev.tif_Batch7
Batch11		9mar18_13oct17_SPRET_m1_sp1_13_rev.tif	13665-29838-29166.tif	1	20	22	no	yes	0	0	9mar18_13oct17_SPRET_m1_sp1_13_rev.tif	13oct17_SPRET_m1	SPRET male	SPRET	male	M.spretus	M.spretus	9mar18_13oct17_SPRET_m1_sp1_13_rev.tif_Batch11
Batch11		14jun18_11jan18_SPRET_m1_sp1_14_rev.tif	18349-24981-17747.tif	1	20	22	no	yes	0	0	14jun18_11jan18_SPRET_m1_sp1_14_rev.tif	11jan18_SPRET_m1	SPRET male	SPRET	male	M.spretus	M.spretus	14jun18_11jan18_SPRET_m1_sp1_14_rev.tif_Batch11
Batch11		14jun18_11jan18_SPRET_m1_sp1_28.1_rev.tif	19635-9359-5873.tif	1	20	25	no	yes	0	0	14jun18_11jan18_SPRET_m1_sp1_28.1_rev.tif	11jan18_SPRET_m1	SPRET male	SPRET	male	M.spretus	M.spretus	14jun18_11jan18_SPRET_m1_sp1_28.1_rev.tif_Batch11
Batch11		28jul17_30may17_SPRET_m1_sp1_4.1_rev.tif	28575-26846-2751.tif	1	20	27	no	yes	0	0	28jul17_30may17_SPRET_m1_sp1_4.1_rev.tif	30may17_SPRET_m1	SPRET male	SPRET	male	M.spretus	M.spretus	28jul17_30may17_SPRET_m1_sp1_4.1_rev.tif_Batch11
Batch11		14jun18_11jan18_SPRET_m1_sp1_27_rev.tif	6262-15474-22902.tif	1	20	27	no	yes	0	0	14jun18_11jan18_SPRET_m1_sp1_27_rev.tif	11jan18_SPRET_m1	SPRET male	SPRET	male	M.spretus	M.spretus	14jun18_11jan18_SPRET_m1_sp1_27_rev.tif_Batch11
Batch11		9mar18_13oct17_SPRET_m1_sp1_25.1_rev.tif	7093-25535-19497.tif	1	20	28	no	yes	0	0	9mar18_13oct17_SPRET_m1_sp1_25.1_rev.tif	13oct17_SPRET_m1	SPRET male	SPRET	male	M.spretus	M.spretus	9mar18_13oct17_SPRET_m1_sp1_25.1_rev.tif_Batch11
Batch11		28jul17_30may17_SPRET_m1_sp1_1_rev.tif	14560-19254-16516.tif	1	20	29	no	yes	0	0	28jul17_30may17_SPRET_m1_sp1_1_rev.tif	30may17_SPRET_m1	SPRET male	SPRET	male	M.spretus	M.spretus	28jul17_30may17_SPRET_m1_sp1_1_rev.tif_Batch11
Batch0		23apr15_4apr15_WSB_f1_sp1_9_rev.tif	22694-13575-4200.tif	1	20	29	no	na	0	0	23apr15_4apr15_WSB_f1_sp1_9_rev.tif	4apr15_WSB_f1	WSB female	WSB	female	Dom	M.musculus	23apr15_4apr15_WSB_f1_sp1_9_rev.tif_Batch0
Batch0		23apr15_4apr15_WSB_f2_sp1_15_rev.tif	24934-26364-18105.tif	1	20	38	no	na	0	0	23apr15_4apr15_WSB_f2_sp1_15_rev.tif	4apr15_WSB_f2	WSB female	WSB	female	Dom	M.musculus	23apr15_4apr15_WSB_f2_sp1_15_rev.tif_Batch0
Batch0		23apr15_4apr15_WSB_f2_sp1_19_rev.tif	1912-20741-3566.tif	1	20	26	yes	na	0	0	23apr15_4apr15_WSB_f2_sp1_19_rev.tif	4apr15_WSB_f2	WSB female	WSB	female	Dom	M.musculus	23apr15_4apr15_WSB_f2_sp1_19_rev.tif_Batch0
Batch0		7may15_4apr15_WSB_f2_sp1_5_rev.tif	22877-12817-4090.tif	1	20	22	no	na	1	0	7may15_4apr15_WSB_f2_sp1_5_rev.tif	4apr15_WSB_f2	WSB female	WSB	female	Dom	M.musculus	7may15_4apr15_WSB_f2_sp1_5_rev.tif_Batch0
Batch2		17nov16_3nov15_WSB_f1_sp3_10_rev.tif	10958-20536-701.tif	1	20	21	no		0	0	17nov16_3nov15_WSB_f1_sp3_10_rev.tif	3nov15_WSB_f1	WSB female	WSB	female	Dom	M.musculus	17nov16_3nov15_WSB_f1_sp3_10_rev.tif_Batch2
Batch2		1may16_3nov15_WSB_f1_sp2_20_rev.tif	12600-30130-30517.tif	1	20	21	no		0	0	1may16_3nov15_WSB_f1_sp2_20_rev.tif	3nov15_WSB_f1	WSB female	WSB	female	Dom	M.musculus	1may16_3nov15_WSB_f1_sp2_20_rev.tif_Batch2
Batch2		17nov16_3nov15_WSB_f1_sp3_9_rev.tif	13044-28151-4166.tif	1	20	29	no		0	0	17nov16_3nov15_WSB_f1_sp3_9_rev.tif	3nov15_WSB_f1	WSB female	WSB	female	Dom	M.musculus	17nov16_3nov15_WSB_f1_sp3_9_rev.tif_Batch2
Batch2		17nov16_3nov15_WSB_f1_sp3_13_rev.tif	21239-49-7458.tif	1	20	23	no		0	0	17nov16_3nov15_WSB_f1_sp3_13_rev.tif	3nov15_WSB_f1	WSB female	WSB	female	Dom	M.musculus	17nov16_3nov15_WSB_f1_sp3_13_rev.tif_Batch2
Batch2		1may16_3nov15_WSB_f1_sp2_8_rev.tif	21863-19135-8333.tif	1	20	23	no		0	0	1may16_3nov15_WSB_f1_sp2_8_rev.tif	3nov15_WSB_f1	WSB female	WSB	female	Dom	M.musculus	1may16_3nov15_WSB_f1_sp2_8_rev.tif_Batch2
Batch2		9mar16_3nov15_WSB_f1_sp3_17_rev.tif	22622-1622-10854.tif	1	20	29	no		0	0	9mar16_3nov15_WSB_f1_sp3_17_rev.tif	3nov15_WSB_f1	WSB female	WSB	female	Dom	M.musculus	9mar16_3nov15_WSB_f1_sp3_17_rev.tif_Batch2
Batch2		1may16_3nov15_WSB_f1_sp2_13_rev.tif	31581-4166-5502.tif	1	20	24	no		1	0	1may16_3nov15_WSB_f1_sp2_13_rev.tif	3nov15_WSB_f1	WSB female	WSB	female	Dom	M.musculus	1may16_3nov15_WSB_f1_sp2_13_rev.tif_Batch2
batch8		12dec17_18nov17_WSB_f2_sp1_24_rev.tif	14173-28955-9215.tif	1	20	31	no		0	0	12dec17_18nov17_WSB_f2_sp1_24_rev.tif	18nov17_WSB_f2	WSB female	WSB	female	Dom	M.musculus	12dec17_18nov17_WSB_f2_sp1_24_rev.tif_batch8
batch8		12dec17_18nov17_WSB_f2_sp1_25_rev.tif	23980-8584-2936.tif	1	20	28	no		0	1	12dec17_18nov17_WSB_f2_sp1_25_rev.tif	18nov17_WSB_f2	WSB female	WSB	female	Dom	M.musculus	12dec17_18nov17_WSB_f2_sp1_25_rev.tif_batch8
batch8		11dec17_18nov17_WSB_f1_sp1_25_rev.tif	26288-17422-3044.tif	1	20	28	no		0	0	11dec17_18nov17_WSB_f1_sp1_25_rev.tif	18nov17_WSB_f1	WSB female	WSB	female	Dom	M.musculus	11dec17_18nov17_WSB_f1_sp1_25_rev.tif_batch8
batch8		12dec17_18nov17_WSB_f2_sp1_23_rev.tif	30060-20190-30810.tif	1	20	21	no		1	0	12dec17_18nov17_WSB_f2_sp1_23_rev.tif	18nov17_WSB_f2	WSB female	WSB	female	Dom	M.musculus	12dec17_18nov17_WSB_f2_sp1_23_rev.tif_batch8
Batch0		27aug15_12jun15_WSB_m2_sp1_21_rev.tif	7322-32446-4972.tif	1	20	25	no	yes	0	0	27aug15_12jun15_WSB_m2_sp1_21_rev.tif	12jun15_WSB_m2	WSB male	WSB	male	Dom	M.musculus	27aug15_12jun15_WSB_m2_sp1_21_rev.tif_Batch0
Batch0		30jul15_12jun15_WSB_m2_sp1_7.3_rev.tif	22552-3813-9622.tif	1	20	23	no	yes	0	0	30jul15_12jun15_WSB_m2_sp1_7.3_rev.tif	12jun15_WSB_m2	WSB male	WSB	male	Dom	M.musculus	30jul15_12jun15_WSB_m2_sp1_7.3_rev.tif_Batch0
Batch0		27aug15_12jun15_WSB_m2_sp1_8.2_rev.tif	3598-3297-37.tif	1	20	26	yes	yes	0	0	27aug15_12jun15_WSB_m2_sp1_8.2_rev.tif	12jun15_WSB_m2	WSB male	WSB	male	Dom	M.musculus	27aug15_12jun15_WSB_m2_sp1_8.2_rev.tif_Batch0
Batch0		10jun15_18may15_WSB_m1_sp1_11_rev.tif	27781-3492-31492.tif	1	20	26	no	yes	0	0	10jun15_18may15_WSB_m1_sp1_11_rev.tif	18may15_WSB_m1	WSB male	WSB	male	Dom	M.musculus	10jun15_18may15_WSB_m1_sp1_11_rev.tif_Batch0
Batch0		10jun15_18may15_WSB_m1_sp1_20_rev.tif	24943-1741-6205.tif	1	20	26	yes	no	0	0	10jun15_18may15_WSB_m1_sp1_20_rev.tif	18may15_WSB_m1	WSB male	WSB	male	Dom	M.musculus	10jun15_18may15_WSB_m1_sp1_20_rev.tif_Batch0
Batch0		10jun15_18may15_WSB_m1_sp1_3_rev.tif	22619-10317-23890.tif	1	20	26	no	yes	0	0	10jun15_18may15_WSB_m1_sp1_3_rev.tif	18may15_WSB_m1	WSB male	WSB	male	Dom	M.musculus	10jun15_18may15_WSB_m1_sp1_3_rev.tif_Batch0
Batch0		10jun15_18may15_WSB_m1_sp1_5_rev.tif	19622-7352-14022.tif	1	20	24	yes	yes	0	0	10jun15_18may15_WSB_m1_sp1_5_rev.tif	18may15_WSB_m1	WSB male	WSB	male	Dom	M.musculus	10jun15_18may15_WSB_m1_sp1_5_rev.tif_Batch0
Batch0		10jun15_18may15_WSB_m1_sp1_9.1_rev.tif	21688-31104-15406.tif	1	20	25	no	no	0	0	10jun15_18may15_WSB_m1_sp1_9.1_rev.tif	18may15_WSB_m1	WSB male	WSB	male	Dom	M.musculus	10jun15_18may15_WSB_m1_sp1_9.1_rev.tif_Batch0
Batch0		13apr15_31mar15_WSB_m2_sp1_19_rev.tif	2655-4262-4602.tif	1	20	26	no	yes	0	0	13apr15_31mar15_WSB_m2_sp1_19_rev.tif	31mar15_WSB_m2	WSB male	WSB	male	Dom	M.musculus	13apr15_31mar15_WSB_m2_sp1_19_rev.tif_Batch0
Batch0		13apr15_31mar15_WSB_m2_sp1_22_rev.tif	29000-11539-818.tif	1	20	20	no	no	0	0	13apr15_31mar15_WSB_m2_sp1_22_rev.tif	31mar15_WSB_m2	WSB male	WSB	male	Dom	M.musculus	13apr15_31mar15_WSB_m2_sp1_22_rev.tif_Batch0
Batch0		13apr15_31mar15_WSB_m2_sp1_6.3_rev.tif	5969-27102-21928.tif	1	20	23	no	yes	0	0	13apr15_31mar15_WSB_m2_sp1_6.3_rev.tif	31mar15_WSB_m2	WSB male	WSB	male	Dom	M.musculus	13apr15_31mar15_WSB_m2_sp1_6.3_rev.tif_Batch0
Batch0		13apr15_31mar15_WSB_m2_sp1_7.2_rev.tif	3613-1110-18445.tif	1	20	24	no	yes	0	0	13apr15_31mar15_WSB_m2_sp1_7.2_rev.tif	31mar15_WSB_m2	WSB male	WSB	male	Dom	M.musculus	13apr15_31mar15_WSB_m2_sp1_7.2_rev.tif_Batch0
Batch13		9mar15_24sep14_WSB_m1_sp1_7.2_rev.tif	6121-12676-8443.tif	1	20	23	no	yes	0	0	9mar15_24sep14_WSB_m1_sp1_7.2_rev.tif	24sep14_WSB_m1	WSB male	WSB	male	Dom	M.musculus	9mar15_24sep14_WSB_m1_sp1_7.2_rev.tif_Batch13
Batch13		9mar15_24sep14_WSB_m1_sp1_10.2_rev.tif	30179-28052-17266.tif	1	20	22	no	yes	0	0	9mar15_24sep14_WSB_m1_sp1_10.2_rev.tif	24sep14_WSB_m1	WSB male	WSB	male	Dom	M.musculus	9mar15_24sep14_WSB_m1_sp1_10.2_rev.tif_Batch13
Batch13		9mar15_24sep14_WSB_m1_sp1_12.1_rev.tif	2959-22332-12598.tif	1	20	27	no	yes	0	0	9mar15_24sep14_WSB_m1_sp1_12.1_rev.tif	24sep14_WSB_m1	WSB male	WSB	male	Dom	M.musculus	9mar15_24sep14_WSB_m1_sp1_12.1_rev.tif_Batch13
Batch13		2nov15_16sep15_WSB_m1_sp1_10_rev.tif	18604-8484-27049.tif	1	20	24	yes	yes	1	0	2nov15_16sep15_WSB_m1_sp1_10_rev.tif	16sep15_WSB_m1	WSB male	WSB	male	Dom	M.musculus	2nov15_16sep15_WSB_m1_sp1_10_rev.tif_Batch13
Batch13		2nov15_16sep15_WSB_m1_sp1_2_rev.tif	1826-10199-26458.tif	1	20	24	no	yes	0	0	2nov15_16sep15_WSB_m1_sp1_2_rev.tif	16sep15_WSB_m1	WSB male	WSB	male	Dom	M.musculus	2nov15_16sep15_WSB_m1_sp1_2_rev.tif_Batch13
Batch13		9mar15_24sep14_WSB_m1_sp1_16.1_rev.tif	17270-3358-2124.tif	1	20	25	no	yes	0	0	9mar15_24sep14_WSB_m1_sp1_16.1_rev.tif	24sep14_WSB_m1	WSB male	WSB	male	Dom	M.musculus	9mar15_24sep14_WSB_m1_sp1_16.1_rev.tif_Batch13
Batch13		9mar15_24sep14_WSB_m1_sp1_14.1_rev.tif	14252-20869-30748.tif	1	20	28	no	yes	0	0	9mar15_24sep14_WSB_m1_sp1_14.1_rev.tif	24sep14_WSB_m1	WSB male	WSB	male	Dom	M.musculus	9mar15_24sep14_WSB_m1_sp1_14.1_rev.tif_Batch13
Batch15		18mar15_10mar15_WSB_m1_sp1_13_rev.tif	5183-7191-5399.tif	1	20	19	no	yes	0	0	18mar15_10mar15_WSB_m1_sp1_13_rev.tif	10mar15_WSB_m1	WSB male	WSB	male	Dom	M.musculus	18mar15_10mar15_WSB_m1_sp1_13_rev.tif_Batch15
Batch15		18mar15_10mar15_WSB_m1_sp1_3.1_rev.tif	19356-6827-11324.tif	1	20	21	no	yes	0	0	18mar15_10mar15_WSB_m1_sp1_3.1_rev.tif	10mar15_WSB_m1	WSB male	WSB	male	Dom	M.musculus	18mar15_10mar15_WSB_m1_sp1_3.1_rev.tif_Batch15
Batch15		18mar15_10mar15_WSB_m1_sp1_7_rev.tif	17366-3940-9272.tif	1	20	22	no	no	0	0	18mar15_10mar15_WSB_m1_sp1_7_rev.tif	10mar15_WSB_m1	WSB male	WSB	male	Dom	M.musculus	18mar15_10mar15_WSB_m1_sp1_7_rev.tif_Batch15
Batch15		10apr15_31mar15_WSB_m3_sp1_3.2_rev.tif	29316-27945-4779.tif	1	20	22	no	yes	0	0	10apr15_31mar15_WSB_m3_sp1_3.2_rev.tif	31mar15_WSB_m3	WSB male	WSB	male	Dom	M.musculus	10apr15_31mar15_WSB_m3_sp1_3.2_rev.tif_Batch15
Batch15		10apr15_31mar15_WSB_m3_sp1_24_rev.tif	1299-25506-16880.tif	1	20	22	no	yes	1	0	10apr15_31mar15_WSB_m3_sp1_24_rev.tif	31mar15_WSB_m3	WSB male	WSB	male	Dom	M.musculus	10apr15_31mar15_WSB_m3_sp1_24_rev.tif_Batch15
Batch15		10apr15_31mar15_WSB_m3_sp1_19.1_rev.tif	5857-25836-12407.tif	1	20	23	no	yes	0	0	10apr15_31mar15_WSB_m3_sp1_19.1_rev.tif	31mar15_WSB_m3	WSB male	WSB	male	Dom	M.musculus	10apr15_31mar15_WSB_m3_sp1_19.1_rev.tif_Batch15
Batch15		10apr15_31mar15_WSB_m3_sp1_13_rev.tif	15663-8034-14932.tif	1	20	23	no	yes	0	0	10apr15_31mar15_WSB_m3_sp1_13_rev.tif	31mar15_WSB_m3	WSB male	WSB	male	Dom	M.musculus	10apr15_31mar15_WSB_m3_sp1_13_rev.tif_Batch15
Batch15		10apr15_31mar15_WSB_m3_sp1_16_rev.tif	18067-24114-12444.tif	1	20	24	no	yes	0	0	10apr15_31mar15_WSB_m3_sp1_16_rev.tif	31mar15_WSB_m3	WSB male	WSB	male	Dom	M.musculus	10apr15_31mar15_WSB_m3_sp1_16_rev.tif_Batch15
Batch15		10apr15_31mar15_WSB_m3_sp1_7.2_rev.tif	30010-6222-19981.tif	1	20	24	no	yes	0	0	10apr15_31mar15_WSB_m3_sp1_7.2_rev.tif	31mar15_WSB_m3	WSB male	WSB	male	Dom	M.musculus	10apr15_31mar15_WSB_m3_sp1_7.2_rev.tif_Batch15
Batch15		10apr15_31mar15_WSB_m3_sp1_17.1_rev.tif	4092-18098-23040.tif	1	20	24	no	yes	1	0	10apr15_31mar15_WSB_m3_sp1_17.1_rev.tif	31mar15_WSB_m3	WSB male	WSB	male	Dom	M.musculus	10apr15_31mar15_WSB_m3_sp1_17.1_rev.tif_Batch15
Batch15		10apr15_31mar15_WSB_m3_sp1_23_rev.tif	23950-7228-23919.tif	1	20	25	no	yes	0	0	10apr15_31mar15_WSB_m3_sp1_23_rev.tif	31mar15_WSB_m3	WSB male	WSB	male	Dom	M.musculus	10apr15_31mar15_WSB_m3_sp1_23_rev.tif_Batch15
Batch15		10apr15_31mar15_WSB_m3_sp1_14_rev.tif	5647-27037-13670.tif	1	20	25	no	yes	0	0	10apr15_31mar15_WSB_m3_sp1_14_rev.tif	31mar15_WSB_m3	WSB male	WSB	male	Dom	M.musculus	10apr15_31mar15_WSB_m3_sp1_14_rev.tif_Batch15
Batch15		10apr15_31mar15_WSB_m3_sp1_18_rev.tif	6130-23549-9707.tif	1	20	26	no	yes	0	0	10apr15_31mar15_WSB_m3_sp1_18_rev.tif	31mar15_WSB_m3	WSB male	WSB	male	Dom	M.musculus	10apr15_31mar15_WSB_m3_sp1_18_rev.tif_Batch15
Batch15		10apr15_31mar15_WSB_m3_sp1_20_rev.tif	25644-14516-24835.tif	1	20	27	no	no	0	0	10apr15_31mar15_WSB_m3_sp1_20_rev.tif	31mar15_WSB_m3	WSB male	WSB	male	Dom	M.musculus	10apr15_31mar15_WSB_m3_sp1_20_rev.tif_Batch15
Batch15		10apr15_31mar15_WSB_m3_sp1_12_rev.tif	32432-28546-31228.tif	1	20	29	no	yes	0	0	10apr15_31mar15_WSB_m3_sp1_12_rev.tif	31mar15_WSB_m3	WSB male	WSB	male	Dom	M.musculus	10apr15_31mar15_WSB_m3_sp1_12_rev.tif_Batch15
Batch18		9mar15_24sep14_WSB_m1_sp1_1_rev.tif	20341-8916-19805.tif	1	20	24	no	yes	0	0	9mar15_24sep14_WSB_m1_sp1_1_rev.tif	24sep14_WSB_m1	WSB male	WSB	male	Dom	M.musculus	9mar15_24sep14_WSB_m1_sp1_1_rev.tif_Batch18
Batch11		29aug18_7aug18_AST_m1_sp1_2_rev.tif	31993-16996-121.tif	2	20	20	no	yes	2	0	29aug18_7aug18_AST_m1_sp1_2_rev.tif	7aug18_AST_m1	AST male	AST	male	Musc	M.musculus	29aug18_7aug18_AST_m1_sp1_2_rev.tif_Batch11
Batch11		27jun18_8jun18_AST_m1_sp1_20_rev.tif	2540-4513-26914.tif	2	20	24	no	yes	1	0	27jun18_8jun18_AST_m1_sp1_20_rev.tif	8jun18_AST_m1	AST male	AST	male	Musc	M.musculus	27jun18_8jun18_AST_m1_sp1_20_rev.tif_Batch11
Batch11		3jul18_8jun18_AST_m1_sp1_12.3_rev.tif	13738-30631-29525.tif	2	20	25	no	yes	0	0	3jul18_8jun18_AST_m1_sp1_12.3_rev.tif	8jun18_AST_m1	AST male	AST	male	Musc	M.musculus	3jul18_8jun18_AST_m1_sp1_12.3_rev.tif_Batch11
Batch11		27jun18_8jun18_AST_m1_sp1_7_rev.tif	2540-9954-1618.tif	2	20	25	no	yes	0	0	27jun18_8jun18_AST_m1_sp1_7_rev.tif	8jun18_AST_m1	AST male	AST	male	Musc	M.musculus	27jun18_8jun18_AST_m1_sp1_7_rev.tif_Batch11
Batch11		29aug18_7aug18_AST_m1_sp1_12_rev.tif	23878-12646-27842.tif	2	20	27	no	yes	0	0	29aug18_7aug18_AST_m1_sp1_12_rev.tif	7aug18_AST_m1	AST male	AST	male	Musc	M.musculus	29aug18_7aug18_AST_m1_sp1_12_rev.tif_Batch11
Batch11		3jul18_8jun18_AST_m1_sp1_15.3_rev.tif	7380-18442-27484.tif	2	20	27	no	yes	0	0	3jul18_8jun18_AST_m1_sp1_15.3_rev.tif	8jun18_AST_m1	AST male	AST	male	Musc	M.musculus	3jul18_8jun18_AST_m1_sp1_15.3_rev.tif_Batch11
Batch11		3jul18_8jun18_AST_m1_sp1_9_rev.tif	3971-3635-2378.tif	2	20	30	no	yes	0	0	3jul18_8jun18_AST_m1_sp1_9_rev.tif	8jun18_AST_m1	AST male	AST	male	Musc	M.musculus	3jul18_8jun18_AST_m1_sp1_9_rev.tif_Batch11
Batch16		16aug19_27aug18_AST_m1_sp1_24_rev.tif	12869-2604-15368.tif	2	20	21	no	yes	2	0	16aug19_27aug18_AST_m1_sp1_24_rev.tif	27aug18_AST_m1	AST male	AST	male	Musc	M.musculus	16aug19_27aug18_AST_m1_sp1_24_rev.tif_Batch16
Batch16		16aug19_27aug18_AST_m1_sp1_23_rev.tif	27585-23876-3655.tif	2	20	25	no	yes	1	0	16aug19_27aug18_AST_m1_sp1_23_rev.tif	27aug18_AST_m1	AST male	AST	male	Musc	M.musculus	16aug19_27aug18_AST_m1_sp1_23_rev.tif_Batch16
Batch16		16aug19_27aug18_AST_m1_sp1_21_rev.tif	18326-14501-13507.tif	2	20	23	no	yes	1	0	16aug19_27aug18_AST_m1_sp1_21_rev.tif	27aug18_AST_m1	AST male	AST	male	Musc	M.musculus	16aug19_27aug18_AST_m1_sp1_21_rev.tif_Batch16
Batch16		16aug19_27aug18_AST_m1_sp1_15.2_rev.tif	15559-11862-18227.tif	2	20	25	no	yes	1	0	16aug19_27aug18_AST_m1_sp1_15.2_rev.tif	27aug18_AST_m1	AST male	AST	male	Musc	M.musculus	16aug19_27aug18_AST_m1_sp1_15.2_rev.tif_Batch16
Batch11		31aug18_1mar18_CAROLI_m1_sp3_25_rev.tif	18871-30015-411.tif	2	20	19	no	yes	1	0	31aug18_1mar18_CAROLI_m1_sp3_25_rev.tif	1mar18_CAROLI_m1	CAROLI male	CAROLI	male	M.caroli	M.caroli	31aug18_1mar18_CAROLI_m1_sp3_25_rev.tif_Batch11
Batch11		31aug18_1mar18_CAROLI_m1_sp3_16.2_rev.tif	14122-30154-6931.tif	2	20	25	no	yes	0	0	31aug18_1mar18_CAROLI_m1_sp3_16.2_rev.tif	1mar18_CAROLI_m1	CAROLI male	CAROLI	male	M.caroli	M.caroli	31aug18_1mar18_CAROLI_m1_sp3_16.2_rev.tif_Batch11
Batch11		31aug18_1mar18_CAROLI_m1_sp3_18_rev.tif	18963-24435-5787.tif	2	20	25	no	yes	2	0	31aug18_1mar18_CAROLI_m1_sp3_18_rev.tif	1mar18_CAROLI_m1	CAROLI male	CAROLI	male	M.caroli	M.caroli	31aug18_1mar18_CAROLI_m1_sp3_18_rev.tif_Batch11
Batch11		31aug18_1mar18_CAROLI_m1_sp3_3_rev.tif	29504-24908-31821.tif	2	20	25	no	yes	0	0	31aug18_1mar18_CAROLI_m1_sp3_3_rev.tif	1mar18_CAROLI_m1	CAROLI male	CAROLI	male	M.caroli	M.caroli	31aug18_1mar18_CAROLI_m1_sp3_3_rev.tif_Batch11
Batch11		31aug18_1mar18_CAROLI_m1_sp3_26.2_rev.tif	3694-15858-10460.tif	2	20	25	no	yes	1	0	31aug18_1mar18_CAROLI_m1_sp3_26.2_rev.tif	1mar18_CAROLI_m1	CAROLI male	CAROLI	male	M.caroli	M.caroli	31aug18_1mar18_CAROLI_m1_sp3_26.2_rev.tif_Batch11
Batch11		31aug18_1mar18_CAROLI_m1_sp3_10_rev.tif	4121-18044-3756.tif	2	20	25	no	yes	1	0	31aug18_1mar18_CAROLI_m1_sp3_10_rev.tif	1mar18_CAROLI_m1	CAROLI male	CAROLI	male	M.caroli	M.caroli	31aug18_1mar18_CAROLI_m1_sp3_10_rev.tif_Batch11
Batch11		31aug18_1mar18_CAROLI_m1_sp3_23_rev.tif	8001-16181-15135.tif	2	20	25	no	yes	0	0	31aug18_1mar18_CAROLI_m1_sp3_23_rev.tif	1mar18_CAROLI_m1	CAROLI male	CAROLI	male	M.caroli	M.caroli	31aug18_1mar18_CAROLI_m1_sp3_23_rev.tif_Batch11
Batch11		31aug18_1mar18_CAROLI_m1_sp3_9_rev.tif	32063-12292-30086.tif	2	20	25	no	yes	1	0	31aug18_1mar18_CAROLI_m1_sp3_9_rev.tif	1mar18_CAROLI_m1	CAROLI male	CAROLI	male	M.caroli	M.caroli	31aug18_1mar18_CAROLI_m1_sp3_9_rev.tif_Batch11
Batch11		31aug18_1mar18_CAROLI_m1_sp3_30.1_rev.tif	19014-2724-9433.tif	2	20	27	no	yes	0	0	31aug18_1mar18_CAROLI_m1_sp3_30.1_rev.tif	1mar18_CAROLI_m1	CAROLI male	CAROLI	male	M.caroli	M.caroli	31aug18_1mar18_CAROLI_m1_sp3_30.1_rev.tif_Batch11
Batch11		31aug18_1mar18_CAROLI_m1_sp3_21.1_rev.tif	5017-7137-16403.tif	2	20	27	no	yes	1	0	31aug18_1mar18_CAROLI_m1_sp3_21.1_rev.tif	1mar18_CAROLI_m1	CAROLI male	CAROLI	male	M.caroli	M.caroli	31aug18_1mar18_CAROLI_m1_sp3_21.1_rev.tif_Batch11
Batch11		31aug18_1mar18_CAROLI_m1_sp3_24_rev.tif	23486-1465-18803.tif	2	20	28	no	yes	0	0	31aug18_1mar18_CAROLI_m1_sp3_24_rev.tif	1mar18_CAROLI_m1	CAROLI male	CAROLI	male	M.caroli	M.caroli	31aug18_1mar18_CAROLI_m1_sp3_24_rev.tif_Batch11
Batch11		31aug18_1mar18_CAROLI_m1_sp3_4.1_rev.tif	23760-17381-23865.tif	2	20	28	no	yes	0	0	31aug18_1mar18_CAROLI_m1_sp3_4.1_rev.tif	1mar18_CAROLI_m1	CAROLI male	CAROLI	male	M.caroli	M.caroli	31aug18_1mar18_CAROLI_m1_sp3_4.1_rev.tif_Batch11
Batch11		31aug18_1mar18_CAROLI_m1_sp3_29.1_rev.tif	17430-13372-31514.tif	2	20	29	no	yes	0	0	31aug18_1mar18_CAROLI_m1_sp3_29.1_rev.tif	1mar18_CAROLI_m1	CAROLI male	CAROLI	male	M.caroli	M.caroli	31aug18_1mar18_CAROLI_m1_sp3_29.1_rev.tif_Batch11
Batch18		12sep19_9apr18_CAROLI_m1_sp2_14_rev.tif	7315-17926-11010.tif	2	20	27	no	yes	0	0	12sep19_9apr18_CAROLI_m1_sp2_14_rev.tif	9apr18_CAROLI_m1	CAROLI male	CAROLI	male	M.caroli	M.caroli	12sep19_9apr18_CAROLI_m1_sp2_14_rev.tif_Batch18
Batch18		12sep19_9apr18_CAROLI_m1_sp2_18_rev.tif	7132-24275-4821.tif	2	20	27	no	yes	1	0	12sep19_9apr18_CAROLI_m1_sp2_18_rev.tif	9apr18_CAROLI_m1	CAROLI male	CAROLI	male	M.caroli	M.caroli	12sep19_9apr18_CAROLI_m1_sp2_18_rev.tif_Batch18
Batch18		12sep19_9apr18_CAROLI_m1_sp2_20.1_rev.tif	26643-5282-10433.tif	2	20	23	no	yes	0	0	12sep19_9apr18_CAROLI_m1_sp2_20.1_rev.tif	9apr18_CAROLI_m1	CAROLI male	CAROLI	male	M.caroli	M.caroli	12sep19_9apr18_CAROLI_m1_sp2_20.1_rev.tif_Batch18
Batch18		12sep19_9apr18_CAROLI_m1_sp2_25.1_rev.tif	3054-3726-14678.tif	2	20	28	no	yes	0	0	12sep19_9apr18_CAROLI_m1_sp2_25.1_rev.tif	9apr18_CAROLI_m1	CAROLI male	CAROLI	male	M.caroli	M.caroli	12sep19_9apr18_CAROLI_m1_sp2_25.1_rev.tif_Batch18
Batch18		12sep19_9apr18_CAROLI_m1_sp2_28_rev.tif	29071-18244-24955.tif	2	20	29	no	yes	0	0	12sep19_9apr18_CAROLI_m1_sp2_28_rev.tif	9apr18_CAROLI_m1	CAROLI male	CAROLI	male	M.caroli	M.caroli	12sep19_9apr18_CAROLI_m1_sp2_28_rev.tif_Batch18
Batch18		12sep19_9apr18_CAROLI_m1_sp2_4.1_rev.tif	2921-25215-19417.tif	2	20	31	yes	yes	0	0	12sep19_9apr18_CAROLI_m1_sp2_4.1_rev.tif	9apr18_CAROLI_m1	CAROLI male	CAROLI	male	M.caroli	M.caroli	12sep19_9apr18_CAROLI_m1_sp2_4.1_rev.tif_Batch18
Batch1		14oct16_30jun16_CAST_m3_sp1_10_rev.tif	22128-21436-3301.tif	2	20	22	no	y	0	0	14oct16_30jun16_CAST_m3_sp1_10_rev.tif	30jun16_CAST_m3	CAST male	CAST	male	Cast	M.musculus	14oct16_30jun16_CAST_m3_sp1_10_rev.tif_Batch1
Batch1		14oct16_30jun16_CAST_m3_sp1_7_rev.tif	26127-26260-29125.tif	2	20	20	no	y	0	0	14oct16_30jun16_CAST_m3_sp1_7_rev.tif	30jun16_CAST_m3	CAST male	CAST	male	Cast	M.musculus	14oct16_30jun16_CAST_m3_sp1_7_rev.tif_Batch1
Batch1		1oct16_30jun16_CAST_m3_sp1_4_rev.tif	16957-31071-31747.tif	2	20	18	no	yes	1	0	1oct16_30jun16_CAST_m3_sp1_4_rev.tif	30jun16_CAST_m3	CAST male	CAST	male	Cast	M.musculus	1oct16_30jun16_CAST_m3_sp1_4_rev.tif_Batch1
Batch1		1oct16_30jun16_CAST_m3_sp1_5.1_rev.tif	16554-32490-2493.tif	2	20	23	no	yes	0	0	1oct16_30jun16_CAST_m3_sp1_5.1_rev.tif	30jun16_CAST_m3	CAST male	CAST	male	Cast	M.musculus	1oct16_30jun16_CAST_m3_sp1_5.1_rev.tif_Batch1
Batch1		9sep16_30jun16_CAST_m1_sp1_14_rev.tif	26728-25198-15481.tif	2	20	20	no	y	1	0	9sep16_30jun16_CAST_m1_sp1_14_rev.tif	30jun16_CAST_m1	CAST male	CAST	male	Cast	M.musculus	9sep16_30jun16_CAST_m1_sp1_14_rev.tif_Batch1
Batch1		9sep16_30jun16_CAST_m1_sp1_16.1_rev.tif	16728-5170-4050.tif	2	20	24	no	yes	0	0	9sep16_30jun16_CAST_m1_sp1_16.1_rev.tif	30jun16_CAST_m1	CAST male	CAST	male	Cast	M.musculus	9sep16_30jun16_CAST_m1_sp1_16.1_rev.tif_Batch1
Batch1		9sep16_30jun16_CAST_m1_sp1_21_rev.tif	19789-20092-5514.tif	2	20	23	no	yes	2	0	9sep16_30jun16_CAST_m1_sp1_21_rev.tif	30jun16_CAST_m1	CAST male	CAST	male	Cast	M.musculus	9sep16_30jun16_CAST_m1_sp1_21_rev.tif_Batch1
Batch1		9sep16_30jun16_CAST_m1_sp1_4.1_rev.tif	5631-5411-915.tif	2	20	25	no	y	0	0	9sep16_30jun16_CAST_m1_sp1_4.1_rev.tif	30jun16_CAST_m1	CAST male	CAST	male	Cast	M.musculus	9sep16_30jun16_CAST_m1_sp1_4.1_rev.tif_Batch1
Batch1		14oct16_30jun16_CAST_m3_sp1_17_rev.tif	7820-26382-18309.tif	2	20	22	y	y	1	0	14oct16_30jun16_CAST_m3_sp1_17_rev.tif	30jun16_CAST_m3	CAST male	CAST	male	Cast	M.musculus	14oct16_30jun16_CAST_m3_sp1_17_rev.tif_Batch1
Batch1		14oct16_30jun16_CAST_m3_sp1_19_rev.tif	9373-26325-3846.tif	2	20	22	y	y	1	0	14oct16_30jun16_CAST_m3_sp1_19_rev.tif	30jun16_CAST_m3	CAST male	CAST	male	Cast	M.musculus	14oct16_30jun16_CAST_m3_sp1_19_rev.tif_Batch1
Batch1		14oct16_30jun16_CAST_m3_sp1_2_rev.tif	6588-23595-24997.tif	2	20	24	y	y	0	0	14oct16_30jun16_CAST_m3_sp1_2_rev.tif	30jun16_CAST_m3	CAST male	CAST	male	Cast	M.musculus	14oct16_30jun16_CAST_m3_sp1_2_rev.tif_Batch1
Batch1		14oct16_30jun16_CAST_m3_sp1_20_rev.tif	18555-2010-25599.tif	2	20	20	y	yes	1	0	14oct16_30jun16_CAST_m3_sp1_20_rev.tif	30jun16_CAST_m3	CAST male	CAST	male	Cast	M.musculus	14oct16_30jun16_CAST_m3_sp1_20_rev.tif_Batch1
Batch1		14oct16_30jun16_CAST_m3_sp1_3.1_rev.tif	2070-22677-8787.tif	2	20	29	y	yes	0	0	14oct16_30jun16_CAST_m3_sp1_3.1_rev.tif	30jun16_CAST_m3	CAST male	CAST	male	Cast	M.musculus	14oct16_30jun16_CAST_m3_sp1_3.1_rev.tif_Batch1
Batch1		9sep16_30jun16_CAST_m1_sp1_13.1_rev.tif	20885-26392-21813.tif	2	20	21	y	yes	0	0	9sep16_30jun16_CAST_m1_sp1_13.1_rev.tif	30jun16_CAST_m1	CAST male	CAST	male	Cast	M.musculus	9sep16_30jun16_CAST_m1_sp1_13.1_rev.tif_Batch1
Batch1		14oct16_30jun16_CAST_m3_sp1_18.2_rev.tif	18549-22954-14992.tif	2	20	22	yes	yes	1	0	14oct16_30jun16_CAST_m3_sp1_18.2_rev.tif	30jun16_CAST_m3	CAST male	CAST	male	Cast	M.musculus	14oct16_30jun16_CAST_m3_sp1_18.2_rev.tif_Batch1
Batch13		14sep18_27aug18_CZECH_m1_sp1_13_rev.tif	3533-17485-13977.tif	2	20	21	no	yes	0	0	14sep18_27aug18_CZECH_m1_sp1_13_rev.tif	27aug18_CZECH_m1	CZECH male	CZECH	male	Musc	M.musculus	14sep18_27aug18_CZECH_m1_sp1_13_rev.tif_Batch13
Batch16		25jul19_28sep18_CZECH_m3_sp1_8.1_rev.tif	20150-28572-14781.tif	2	20	27	no	yes	1	0	25jul19_28sep18_CZECH_m3_sp1_8.1_rev.tif	28sep18_CZECH_m3	CZECH male	CZECH	male	Musc	M.musculus	25jul19_28sep18_CZECH_m3_sp1_8.1_rev.tif_Batch16
Batch16		25jul19_28sep18_CZECH_m3_sp1_7_rev.tif	23734-7276-15046.tif	2	20	21	no	yes	2	0	25jul19_28sep18_CZECH_m3_sp1_7_rev.tif	28sep18_CZECH_m3	CZECH male	CZECH	male	Musc	M.musculus	25jul19_28sep18_CZECH_m3_sp1_7_rev.tif_Batch16
Batch16		23jul19_28sep18_CZECH_m2_sp1_16.1_rev.tif	3703-27026-16811.tif	2	20	25	no	yes	0	0	23jul19_28sep18_CZECH_m2_sp1_16.1_rev.tif	28sep18_CZECH_m2	CZECH male	CZECH	male	Musc	M.musculus	23jul19_28sep18_CZECH_m2_sp1_16.1_rev.tif_Batch16
Batch16		12oct18_26sep18_CZECH_m1_sp1_26_rev.tif	15786-12461-18622.tif	2	20	25	no	yes	0	0	12oct18_26sep18_CZECH_m1_sp1_26_rev.tif	26sep18_CZECH_m1	CZECH male	CZECH	male	Musc	M.musculus	12oct18_26sep18_CZECH_m1_sp1_26_rev.tif_Batch16
Batch0		15mar16_16jan16_G_f1_sp1_4_rev.tif	297-26266-5137.tif	2	20	35	no	na	0	0	15mar16_16jan16_G_f1_sp1_4_rev.tif	16jan16_G_f1	G female	G	female	Dom	M.musculus	15mar16_16jan16_G_f1_sp1_4_rev.tif_Batch0
Batch0		15mar16_16jan16_G_f2_sp1_1_rev.tif	21367-24896-31387.tif	2	20	28	na	na	0	0	15mar16_16jan16_G_f2_sp1_1_rev.tif	16jan16_G_f2	G female	G	female	Dom	M.musculus	15mar16_16jan16_G_f2_sp1_1_rev.tif_Batch0
Batch0		15mar16_16jan16_G_f2_sp1_33_rev.tif	13606-24795-11085.tif	2	20	34	no	na	0	0	15mar16_16jan16_G_f2_sp1_33_rev.tif	16jan16_G_f2	G female	G	female	Dom	M.musculus	15mar16_16jan16_G_f2_sp1_33_rev.tif_Batch0
Batch0		27mar16_17mar16_G_f1_sp1_1_rev.tif	30829-17164-2967.tif	2	20	30	no	na	0	0	27mar16_17mar16_G_f1_sp1_1_rev.tif	17mar16_G_f1	G female	G	female	Dom	M.musculus	27mar16_17mar16_G_f1_sp1_1_rev.tif_Batch0
Batch0		27mar16_17mar16_G_f1_sp1_12_rev.tif	29613-7510-3810.tif	2	20	31	no	na	0	0	27mar16_17mar16_G_f1_sp1_12_rev.tif	17mar16_G_f1	G female	G	female	Dom	M.musculus	27mar16_17mar16_G_f1_sp1_12_rev.tif_Batch0
Batch0		4apr16_17mar16_G_f3_sp1_23_rev.tif	28612-27090-7706.tif	2	20	24	no	na	0	0	4apr16_17mar16_G_f3_sp1_23_rev.tif	17mar16_G_f3	G female	G	female	Dom	M.musculus	4apr16_17mar16_G_f3_sp1_23_rev.tif_Batch0
Batch0		4apr16_17mar16_G_f3_sp1_25_rev.tif	25753-18182-7728.tif	2	20	27	no	na	0	0	4apr16_17mar16_G_f3_sp1_25_rev.tif	17mar16_G_f3	G female	G	female	Dom	M.musculus	4apr16_17mar16_G_f3_sp1_25_rev.tif_Batch0
Batch0		4apr16_17mar16_G_f4_sp1_32_rev.tif	25670-6386-10784.tif	2	20	25	no	na	0	0	4apr16_17mar16_G_f4_sp1_32_rev.tif	17mar16_G_f4	G female	G	female	Dom	M.musculus	4apr16_17mar16_G_f4_sp1_32_rev.tif_Batch0
Batch0		1mar16_20feb16_G_f3_sp1_12_rev.tif	5704-12836-15845.tif	2	20	32	no	na	0	0	1mar16_20feb16_G_f3_sp1_12_rev.tif	20feb16_G_f3	G female	G	female	Dom	M.musculus	1mar16_20feb16_G_f3_sp1_12_rev.tif_Batch0
Batch0		1mar16_20feb16_G_f3_sp1_18_rev.tif	27793-1403-351.tif	2	20	39	no	na	0	0	1mar16_20feb16_G_f3_sp1_18_rev.tif	20feb16_G_f3	G female	G	female	Dom	M.musculus	1mar16_20feb16_G_f3_sp1_18_rev.tif_Batch0
Batch0		1mar16_20feb16_G_f3_sp1_19_rev.tif	4799-1196-23852.tif	2	20	32	no	na	0	0	1mar16_20feb16_G_f3_sp1_19_rev.tif	20feb16_G_f3	G female	G	female	Dom	M.musculus	1mar16_20feb16_G_f3_sp1_19_rev.tif_Batch0
Batch0		1mar16_20feb16_G_f3_sp1_28_rev.tif	29231-18885-8338.tif	2	20	28	no	na	0	0	1mar16_20feb16_G_f3_sp1_28_rev.tif	20feb16_G_f3	G female	G	female	Dom	M.musculus	1mar16_20feb16_G_f3_sp1_28_rev.tif_Batch0
Batch0		1mar16_20feb16_G_f3_sp1_3_rev.tif	3528-20977-30326.tif	2	20	36	no	na	0	0	1mar16_20feb16_G_f3_sp1_3_rev.tif	20feb16_G_f3	G female	G	female	Dom	M.musculus	1mar16_20feb16_G_f3_sp1_3_rev.tif_Batch0
Batch0		4apr16_17mar16_G_f3_sp1_4_rev.tif	27593-17986-24683.tif	2	20	25	no	na	1	0	4apr16_17mar16_G_f3_sp1_4_rev.tif	17mar16_G_f3	G female	G	female	Dom	M.musculus	4apr16_17mar16_G_f3_sp1_4_rev.tif_Batch0
Batch0		1mar16_20feb16_G_f3_sp1_17_rev.tif	29123-146-17601.tif	2	20	24	no	na	1	0	1mar16_20feb16_G_f3_sp1_17_rev.tif	20feb16_G_f3	G female	G	female	Dom	M.musculus	1mar16_20feb16_G_f3_sp1_17_rev.tif_Batch0
Batch2		17nov16_17mar16_G_f1_sp1_2_rev.tif	1209-15710-11234.tif	2	20	31	no		1	0	17nov16_17mar16_G_f1_sp1_2_rev.tif	17mar16_G_f1	G female	G	female	Dom	M.musculus	17nov16_17mar16_G_f1_sp1_2_rev.tif_Batch2
Batch2		17nov16_17mar16_G_f1_sp1_8_rev.tif	1212-18532-28020.tif	2	20	28	no		2	0	17nov16_17mar16_G_f1_sp1_8_rev.tif	17mar16_G_f1	G female	G	female	Dom	M.musculus	17nov16_17mar16_G_f1_sp1_8_rev.tif_Batch2
Batch2		17nov16_17mar16_G_f1_sp1_18_rev.tif	12233-14121-5697.tif	2	20	27	no		0	0	17nov16_17mar16_G_f1_sp1_18_rev.tif	17mar16_G_f1	G female	G	female	Dom	M.musculus	17nov16_17mar16_G_f1_sp1_18_rev.tif_Batch2
Batch2		27mar16_17mar16_G_f5_sp1_5_rev.tif	13074-21604-16530.tif	2	20	27	no		0	0	27mar16_17mar16_G_f5_sp1_5_rev.tif	17mar16_G_f5	G female	G	female	Dom	M.musculus	27mar16_17mar16_G_f5_sp1_5_rev.tif_Batch2
Batch2		21nov16_16jan16_G_f2_sp1_18_rev.tif	13260-32206-27322.tif	2	20	25	no		1	0	21nov16_16jan16_G_f2_sp1_18_rev.tif	16jan16_G_f2	G female	G	female	Dom	M.musculus	21nov16_16jan16_G_f2_sp1_18_rev.tif_Batch2
Batch2		15mar16_16jan16_G_f2_sp1_25_rev.tif	14188-4452-12756.tif	2	20	26	no		0	0	15mar16_16jan16_G_f2_sp1_25_rev.tif	16jan16_G_f2	G female	G	female	Dom	M.musculus	15mar16_16jan16_G_f2_sp1_25_rev.tif_Batch2
Batch2		15mar16_16jan16_G_f2_sp1_26_rev.tif	14311-22582-26015.tif	2	20	29	no		1	0	15mar16_16jan16_G_f2_sp1_26_rev.tif	16jan16_G_f2	G female	G	female	Dom	M.musculus	15mar16_16jan16_G_f2_sp1_26_rev.tif_Batch2
Batch2		21nov16_16jan16_G_f2_sp1_7_rev.tif	14565-26838-4068.tif	2	20	30	no		0	0	21nov16_16jan16_G_f2_sp1_7_rev.tif	16jan16_G_f2	G female	G	female	Dom	M.musculus	21nov16_16jan16_G_f2_sp1_7_rev.tif_Batch2
Batch2		17nov16_17mar16_G_f1_sp1_27.2_rev.tif	17854-27210-31080.tif	2	20	32	no		0	0	17nov16_17mar16_G_f1_sp1_27.2_rev.tif	17mar16_G_f1	G female	G	female	Dom	M.musculus	17nov16_17mar16_G_f1_sp1_27.2_rev.tif_Batch2
Batch2		21nov16_16jan16_G_f2_sp1_9_rev.tif	2180-24054-17823.tif	2	20	21	no		0	0	21nov16_16jan16_G_f2_sp1_9_rev.tif	16jan16_G_f2	G female	G	female	Dom	M.musculus	21nov16_16jan16_G_f2_sp1_9_rev.tif_Batch2
Batch2		17nov16_17mar16_G_f1_sp1_32_rev.tif	24602-10817-2026.tif	2	20	22	no		0	0	17nov16_17mar16_G_f1_sp1_32_rev.tif	17mar16_G_f1	G female	G	female	Dom	M.musculus	17nov16_17mar16_G_f1_sp1_32_rev.tif_Batch2
Batch2		14mar16_16jan16_G_f2_sp1_1_rev.tif	24632-31077-11880.tif	2	20	29	no		0	0	14mar16_16jan16_G_f2_sp1_1_rev.tif	16jan16_G_f2	G female	G	female	Dom	M.musculus	14mar16_16jan16_G_f2_sp1_1_rev.tif_Batch2
Batch2		17nov16_17mar16_G_f1_sp1_13_rev.tif	27319-5149-30057.tif	2	20	33	no		0	0	17nov16_17mar16_G_f1_sp1_13_rev.tif	17mar16_G_f1	G female	G	female	Dom	M.musculus	17nov16_17mar16_G_f1_sp1_13_rev.tif_Batch2
Batch2		27mar16_17mar16_G_f1_sp1_4_rev.tif	27767-19915-27332.tif	2	20	28	no		0	0	27mar16_17mar16_G_f1_sp1_4_rev.tif	17mar16_G_f1	G female	G	female	Dom	M.musculus	27mar16_17mar16_G_f1_sp1_4_rev.tif_Batch2
Batch2		15mar16_16jan16_G_f2_sp1_19_rev.tif	28245-7782-15994.tif	2	20	23	no		1	0	15mar16_16jan16_G_f2_sp1_19_rev.tif	16jan16_G_f2	G female	G	female	Dom	M.musculus	15mar16_16jan16_G_f2_sp1_19_rev.tif_Batch2
Batch2		17nov16_17mar16_G_f1_sp1_36_rev.tif	29206-32321-4552.tif	2	20	25	no		0	0	17nov16_17mar16_G_f1_sp1_36_rev.tif	17mar16_G_f1	G female	G	female	Dom	M.musculus	17nov16_17mar16_G_f1_sp1_36_rev.tif_Batch2
Batch2		27mar16_17mar16_G_f5_sp1_7_rev.tif	30470-32211-31296.tif	2	20	29	no		0	0	27mar16_17mar16_G_f5_sp1_7_rev.tif	17mar16_G_f5	G female	G	female	Dom	M.musculus	27mar16_17mar16_G_f5_sp1_7_rev.tif_Batch2
Batch2		17nov16_17mar16_G_f1_sp1_34_rev.tif	71-11036-28301.tif	2	20	37	no		0	0	17nov16_17mar16_G_f1_sp1_34_rev.tif	17mar16_G_f1	G female	G	female	Dom	M.musculus	17nov16_17mar16_G_f1_sp1_34_rev.tif_Batch2
Batch2		17nov16_17mar16_G_f1_sp1_24_rev.tif	9793-12282-29857.tif	2	20	30	no		0	0	17nov16_17mar16_G_f1_sp1_24_rev.tif	17mar16_G_f1	G female	G	female	Dom	M.musculus	17nov16_17mar16_G_f1_sp1_24_rev.tif_Batch2
Batch2		21nov16_16jan16_G_f2_sp1_11_rev.tif	804-23419-1319.tif	2	20	28	no		1	0	21nov16_16jan16_G_f2_sp1_11_rev.tif	16jan16_G_f2	G female	G	female	Dom	M.musculus	21nov16_16jan16_G_f2_sp1_11_rev.tif_Batch2
Batch2		27mar16_17mar16_G_f1_sp1_11_rev.tif	13516-10967-16898.tif	2	20	29	no		0	1	27mar16_17mar16_G_f1_sp1_11_rev.tif	17mar16_G_f1	G female	G	female	Dom	M.musculus	27mar16_17mar16_G_f1_sp1_11_rev.tif_Batch2
Batch2		17nov16_17mar16_G_f1_sp1_33_rev.tif	18307-6186-27726.tif	2	20	35	no		0	1	17nov16_17mar16_G_f1_sp1_33_rev.tif	17mar16_G_f1	G female	G	female	Dom	M.musculus	17nov16_17mar16_G_f1_sp1_33_rev.tif_Batch2
Batch2		21nov16_16jan16_G_f2_sp1_15_rev.tif	26062-32460-7675.tif	2	20	41	no		1	1	21nov16_16jan16_G_f2_sp1_15_rev.tif	16jan16_G_f2	G female	G	female	Dom	M.musculus	21nov16_16jan16_G_f2_sp1_15_rev.tif_Batch2
Batch2		16nov16_17mar16_G_f5_sp1_11_rev.tif	7090-4758-25397.tif	2	20	26	no		0	1	16nov16_17mar16_G_f5_sp1_11_rev.tif	17mar16_G_f5	G female	G	female	Dom	M.musculus	16nov16_17mar16_G_f5_sp1_11_rev.tif_Batch2
Batch2		17nov16_17mar16_G_f1_sp1_3.1_rev.tif	8942-4654-12979.tif	2	20	36	yes		0	1	17nov16_17mar16_G_f1_sp1_3.1_rev.tif	17mar16_G_f1	G female	G	female	Dom	M.musculus	17nov16_17mar16_G_f1_sp1_3.1_rev.tif_Batch2
Batch4		15mar16_16jan16_G_f1_sp1_10_rev.tif	26867-411-24164.tif	2	20	32			0	0	15mar16_16jan16_G_f1_sp1_10_rev.tif	16jan16_G_f1	G female	G	female	Dom	M.musculus	15mar16_16jan16_G_f1_sp1_10_rev.tif_Batch4
Batch4		15mar16_16jan16_G_f1_sp1_2_rev.tif	31017-27745-16194.tif	2	20	31			0	0	15mar16_16jan16_G_f1_sp1_2_rev.tif	16jan16_G_f1	G female	G	female	Dom	M.musculus	15mar16_16jan16_G_f1_sp1_2_rev.tif_Batch4
Batch4		15mar16_16jan16_G_f1_sp1_3_rev.tif	14190-22829-32540.tif	2	20	37			0	0	15mar16_16jan16_G_f1_sp1_3_rev.tif	16jan16_G_f1	G female	G	female	Dom	M.musculus	15mar16_16jan16_G_f1_sp1_3_rev.tif_Batch4
Batch4		15mar16_16jan16_G_f1_sp1_5_rev.tif	31346-6531-21457.tif	2	20	30			0	1	15mar16_16jan16_G_f1_sp1_5_rev.tif	16jan16_G_f1	G female	G	female	Dom	M.musculus	15mar16_16jan16_G_f1_sp1_5_rev.tif_Batch4
Batch4		15mar16_16jan16_G_f1_sp1_6_rev.tif	22809-31897-18502.tif	2	20	29			0	3	15mar16_16jan16_G_f1_sp1_6_rev.tif	16jan16_G_f1	G female	G	female	Dom	M.musculus	15mar16_16jan16_G_f1_sp1_6_rev.tif_Batch4
Batch4		16feb16_17mar16_G_f4_sp1_13_rev.tif	11999-8657-21416.tif	2	20	25			0	0	16feb16_17mar16_G_f4_sp1_13_rev.tif	17mar16_G_f4	G female	G	female	Dom	M.musculus	16feb16_17mar16_G_f4_sp1_13_rev.tif_Batch4
Batch4		16feb16_17mar16_G_f4_sp1_3_rev.tif	3473-15901-16593.tif	2	20	27			0	0	16feb16_17mar16_G_f4_sp1_3_rev.tif	17mar16_G_f4	G female	G	female	Dom	M.musculus	16feb16_17mar16_G_f4_sp1_3_rev.tif_Batch4
Batch4		16feb16_17mar16_G_f4_sp1_6_rev.tif	13037-23208-8371.tif	2	20	33			0	0	16feb16_17mar16_G_f4_sp1_6_rev.tif	17mar16_G_f4	G female	G	female	Dom	M.musculus	16feb16_17mar16_G_f4_sp1_6_rev.tif_Batch4
Batch4		16feb16_17mar16_G_f4_sp1_7_rev.tif	4431-18421-22657.tif	2	20	22			1	0	16feb16_17mar16_G_f4_sp1_7_rev.tif	17mar16_G_f4	G female	G	female	Dom	M.musculus	16feb16_17mar16_G_f4_sp1_7_rev.tif_Batch4
Batch4		8feb17_17mar16_G_f5_sp1_10_rev.tif	16952-26223-9368.tif	2	20	25			2	1	8feb17_17mar16_G_f5_sp1_10_rev.tif	17mar16_G_f5	G female	G	female	Dom	M.musculus	8feb17_17mar16_G_f5_sp1_10_rev.tif_Batch4
Batch4		8feb17_17mar16_G_f5_sp1_9_rev.tif	10180-30561-26702.tif	2	20	25			1	0	8feb17_17mar16_G_f5_sp1_9_rev.tif	17mar16_G_f5	G female	G	female	Dom	M.musculus	8feb17_17mar16_G_f5_sp1_9_rev.tif_Batch4
Batch5		24may17_17mar16_G_f5_sp1_13_rev.tif	5373-21634-27467.tif	2	20	24	no		0	0	24may17_17mar16_G_f5_sp1_13_rev.tif	17mar16_G_f5	G female	G	female	Dom	M.musculus	24may17_17mar16_G_f5_sp1_13_rev.tif_Batch5
Batch5		4apr16_17mar16_G_f4_sp1_13_rev.tif	13380-4314-5433.tif	2	20	27	no	na	0	0	4apr16_17mar16_G_f4_sp1_13_rev.tif	17mar16_G_f4	G female	G	female	Dom	M.musculus	4apr16_17mar16_G_f4_sp1_13_rev.tif_Batch5
Batch5		24may17_17mar16_G_f5_sp1_14_rev.tif	16473-26787-24150.tif	2	20	29	no		0	0	24may17_17mar16_G_f5_sp1_14_rev.tif	17mar16_G_f5	G female	G	female	Dom	M.musculus	24may17_17mar16_G_f5_sp1_14_rev.tif_Batch5
Batch5		2jul17_17mar16_G_f4_sp1_7_rev.tif	23394-29828-17760.tif	2	20	29	no		0	1	2jul17_17mar16_G_f4_sp1_7_rev.tif	17mar16_G_f4	G female	G	female	Dom	M.musculus	2jul17_17mar16_G_f4_sp1_7_rev.tif_Batch5
Batch5		4apr16_17mar16_G_f4_sp1_9_rev.tif	25061-19231-27637.tif	2	20	36	no		0	0	4apr16_17mar16_G_f4_sp1_9_rev.tif	17mar16_G_f4	G female	G	female	Dom	M.musculus	4apr16_17mar16_G_f4_sp1_9_rev.tif_Batch5
Batch5		4apr16_17mar16_G_f4_sp1_11_rev.tif	19573-32756-23425.tif	2	20	25	no		0	0	4apr16_17mar16_G_f4_sp1_11_rev.tif	17mar16_G_f4	G female	G	female	Dom	M.musculus	4apr16_17mar16_G_f4_sp1_11_rev.tif_Batch5
Batch5		2jul17_17mar16_G_f4_sp1_8_rev.tif	2228-15600-1470.tif	2	20	28	no		1	0	2jul17_17mar16_G_f4_sp1_8_rev.tif	17mar16_G_f4	G female	G	female	Dom	M.musculus	2jul17_17mar16_G_f4_sp1_8_rev.tif_Batch5
Batch5		4apr16_17mar16_G_f4_sp1_29_rev.tif	16486-3007-27702.tif	2	20	30	no		1	0	4apr16_17mar16_G_f4_sp1_29_rev.tif	17mar16_G_f4	G female	G	female	Dom	M.musculus	4apr16_17mar16_G_f4_sp1_29_rev.tif_Batch5
Batch5		24may17_17mar16_G_f5_sp1_9_rev.tif	30113-4373-18020.tif	2	20	30	no		1	0	24may17_17mar16_G_f5_sp1_9_rev.tif	17mar16_G_f5	G female	G	female	Dom	M.musculus	24may17_17mar16_G_f5_sp1_9_rev.tif_Batch5
Batch5		24may17_17mar16_G_f5_sp1_15_rev.tif	17078-20894-2945.tif	2	20	25	no		2	0	24may17_17mar16_G_f5_sp1_15_rev.tif	17mar16_G_f5	G female	G	female	Dom	M.musculus	24may17_17mar16_G_f5_sp1_15_rev.tif_Batch5
Batch5		24may17_17mar16_G_f5_sp1_3_rev.tif	26840-30334-31789.tif	2	20	25	no		2	0	24may17_17mar16_G_f5_sp1_3_rev.tif	17mar16_G_f5	G female	G	female	Dom	M.musculus	24may17_17mar16_G_f5_sp1_3_rev.tif_Batch5
Batch5		4apr16_17mar16_G_f4_sp1_18_rev.tif	23084-11460-5709.tif	2	20	23	no		3	1	4apr16_17mar16_G_f4_sp1_18_rev.tif	17mar16_G_f4	G female	G	female	Dom	M.musculus	4apr16_17mar16_G_f4_sp1_18_rev.tif_Batch5
Batch14		31mar15_13oct14_G_f1_sp1_53.1_rev.tif	26995-29620-65.tif	2	20	31	no		1	0	31mar15_13oct14_G_f1_sp1_53.1_rev.tif	13oct14_G_f1	G female	G	female	Dom	M.musculus	31mar15_13oct14_G_f1_sp1_53.1_rev.tif_Batch14
Batch14		31mar15_13oct14_G_f1_sp1_46_rev.tif	5779-419-13405.tif	2	20	28	no		0	0	31mar15_13oct14_G_f1_sp1_46_rev.tif	13oct14_G_f1	G female	G	female	Dom	M.musculus	31mar15_13oct14_G_f1_sp1_46_rev.tif_Batch14
Batch14		31mar15_13oct14_G_f1_sp1_37_rev.tif	25495-26774-15541.tif	2	20	25	no		0	1	31mar15_13oct14_G_f1_sp1_37_rev.tif	13oct14_G_f1	G female	G	female	Dom	M.musculus	31mar15_13oct14_G_f1_sp1_37_rev.tif_Batch14
Batch14		31mar15_13oct14_G_f1_sp1_18_rev.tif	24922-30467-6363.tif	2	20	23	no		1	1	31mar15_13oct14_G_f1_sp1_18_rev.tif	13oct14_G_f1	G female	G	female	Dom	M.musculus	31mar15_13oct14_G_f1_sp1_18_rev.tif_Batch14
Batch14		30mar15_13oct14_G_f1_sp1_9_rev.tif	18058-8665-21850.tif	2	20	22	no		0	1	30mar15_13oct14_G_f1_sp1_9_rev.tif	13oct14_G_f1	G female	G	female	Dom	M.musculus	30mar15_13oct14_G_f1_sp1_9_rev.tif_Batch14
Batch14		30mar15_13oct14_G_f1_sp1_2.2_rev.tif	18660-14148-15484.tif	2	20	24	no		0	0	30mar15_13oct14_G_f1_sp1_2.2_rev.tif	13oct14_G_f1	G female	G	female	Dom	M.musculus	30mar15_13oct14_G_f1_sp1_2.2_rev.tif_Batch14
Batch14		30mar15_13oct14_G_f1_sp1_19_rev.tif	15514-12475-27625.tif	2	20	23	no		0	0	30mar15_13oct14_G_f1_sp1_19_rev.tif	13oct14_G_f1	G female	G	female	Dom	M.musculus	30mar15_13oct14_G_f1_sp1_19_rev.tif_Batch14
Batch14		30mar15_13oct14_G_f1_sp1_1.2_rev.tif	6805-13606-26230.tif	2	20	28	no		0	0	30mar15_13oct14_G_f1_sp1_1.2_rev.tif	13oct14_G_f1	G female	G	female	Dom	M.musculus	30mar15_13oct14_G_f1_sp1_1.2_rev.tif_Batch14
Batch14		27mar16_17mar16_G_f2_sp1_9_rev.tif	19034-32459-14136.tif	2	20	33	no		0	0	27mar16_17mar16_G_f2_sp1_9_rev.tif	17mar16_G_f2	G female	G	female	Dom	M.musculus	27mar16_17mar16_G_f2_sp1_9_rev.tif_Batch14
Batch14		27mar16_17mar16_G_f2_sp1_8_rev.tif	15353-5233-10035.tif	2	20	29	no		2	0	27mar16_17mar16_G_f2_sp1_8_rev.tif	17mar16_G_f2	G female	G	female	Dom	M.musculus	27mar16_17mar16_G_f2_sp1_8_rev.tif_Batch14
Batch14		27mar16_17mar16_G_f2_sp1_5_rev.tif	12302-679-27139.tif	2	20	24	no		1	0	27mar16_17mar16_G_f2_sp1_5_rev.tif	17mar16_G_f2	G female	G	female	Dom	M.musculus	27mar16_17mar16_G_f2_sp1_5_rev.tif_Batch14
Batch14		27mar16_17mar16_G_f2_sp1_4_rev.tif	25838-3946-26880.tif	2	20	26	no		1	0	27mar16_17mar16_G_f2_sp1_4_rev.tif	17mar16_G_f2	G female	G	female	Dom	M.musculus	27mar16_17mar16_G_f2_sp1_4_rev.tif_Batch14
Batch14		17feb15_13oct14_G_f2_sp1_15_rev.tif	23371-22499-6322.tif	2	20	25	no		0	0	17feb15_13oct14_G_f2_sp1_15_rev.tif	13oct14_G_f2	G female	G	female	Dom	M.musculus	17feb15_13oct14_G_f2_sp1_15_rev.tif_Batch14
Batch17		2may16_20feb16_G_f1_sp1_16_rev.tif	32659-28878-16922.tif	2	20	31			0	1	2may16_20feb16_G_f1_sp1_16_rev.tif	20feb16_G_f1	G female	G	female	Dom	M.musculus	2may16_20feb16_G_f1_sp1_16_rev.tif_Batch17
Batch17		2may16_20feb16_G_f1_sp1_17_rev.tif	31021-17727-30359.tif	2	20	25			1	0	2may16_20feb16_G_f1_sp1_17_rev.tif	20feb16_G_f1	G female	G	female	Dom	M.musculus	2may16_20feb16_G_f1_sp1_17_rev.tif_Batch17
Batch17		2may16_20feb16_G_f1_sp1_27_rev.tif	25171-8389-12450.tif	2	20	30			0	0	2may16_20feb16_G_f1_sp1_27_rev.tif	20feb16_G_f1	G female	G	female	Dom	M.musculus	2may16_20feb16_G_f1_sp1_27_rev.tif_Batch17
Batch17		2may16_20feb16_G_f1_sp1_7.1_rev.tif	30889-17749-28952.tif	2	20	22			0	0	2may16_20feb16_G_f1_sp1_7.1_rev.tif	20feb16_G_f1	G female	G	female	Dom	M.musculus	2may16_20feb16_G_f1_sp1_7.1_rev.tif_Batch17
Batch17		3sep19_20feb16_G_f2_sp1_3_rev.tif	23794-2350-31150.tif	2	20	28			0	0	3sep19_20feb16_G_f2_sp1_3_rev.tif	20feb16_G_f2	G female	G	female	Dom	M.musculus	3sep19_20feb16_G_f2_sp1_3_rev.tif_Batch17
Batch17		3sep19_20feb16_G_f2_sp1_5_rev.tif	10877-14701-9774.tif	2	20	30			0	0	3sep19_20feb16_G_f2_sp1_5_rev.tif	20feb16_G_f2	G female	G	female	Dom	M.musculus	3sep19_20feb16_G_f2_sp1_5_rev.tif_Batch17
Batch17		3sep19_20feb16_G_f2_sp1_8_rev.tif	11564-11991-14960.tif	2	20	27			1	0	3sep19_20feb16_G_f2_sp1_8_rev.tif	20feb16_G_f2	G female	G	female	Dom	M.musculus	3sep19_20feb16_G_f2_sp1_8_rev.tif_Batch17
Batch0		19oct15_12oct15_G_m1_sp1_10_rev.tif	25827-8010-551.tif	2	20	24	no	no	0	0	19oct15_12oct15_G_m1_sp1_10_rev.tif	12oct15_G_m1	G male	G	male	Dom	M.musculus	19oct15_12oct15_G_m1_sp1_10_rev.tif_Batch0
Batch0		19oct15_12oct15_G_m1_sp1_12.2_rev.tif	463-24881-1493.tif	2	20	24	no	yes	0	0	19oct15_12oct15_G_m1_sp1_12.2_rev.tif	12oct15_G_m1	G male	G	male	Dom	M.musculus	19oct15_12oct15_G_m1_sp1_12.2_rev.tif_Batch0
Batch0		19oct15_12oct15_G_m1_sp1_18.1_rev.tif	7769-30643-15508.tif	2	20	22	no	yes	0	0	19oct15_12oct15_G_m1_sp1_18.1_rev.tif	12oct15_G_m1	G male	G	male	Dom	M.musculus	19oct15_12oct15_G_m1_sp1_18.1_rev.tif_Batch0
Batch0		19oct15_12oct15_G_m1_sp1_2.2_rev.tif	22291-10672-28927.tif	2	20	21	no	yes	0	0	19oct15_12oct15_G_m1_sp1_2.2_rev.tif	12oct15_G_m1	G male	G	male	Dom	M.musculus	19oct15_12oct15_G_m1_sp1_2.2_rev.tif_Batch0
Batch0		19oct15_12oct15_G_m1_sp1_3.2_rev.tif	28966-21145-7035.tif	2	20	27	yes	yes	0	0	19oct15_12oct15_G_m1_sp1_3.2_rev.tif	12oct15_G_m1	G male	G	male	Dom	M.musculus	19oct15_12oct15_G_m1_sp1_3.2_rev.tif_Batch0
Batch0		19oct15_12oct15_G_m1_sp1_4_rev.tif	18896-29139-14074.tif	2	20	28	no	yes	0	0	19oct15_12oct15_G_m1_sp1_4_rev.tif	12oct15_G_m1	G male	G	male	Dom	M.musculus	19oct15_12oct15_G_m1_sp1_4_rev.tif_Batch0
Batch0		9mar16_22feb16_G_m1_sp1_2_rev.tif	24521-8057-14739.tif	2	20	22	yes	yes	0	0	9mar16_22feb16_G_m1_sp1_2_rev.tif	22feb16_G_m1	G male	G	male	Dom	M.musculus	9mar16_22feb16_G_m1_sp1_2_rev.tif_Batch0
Batch0		20jul15_22jun15_G_m1_sp1_4_rev.tif	4051-7896-6594.tif	2	20	25	no	yes	0	0	20jul15_22jun15_G_m1_sp1_4_rev.tif	22jun15_G_m1	G male	G	male	Dom	M.musculus	20jul15_22jun15_G_m1_sp1_4_rev.tif_Batch0
Batch0		30jul15_22jun15_G_m1_sp1_4_rev.tif	2314-28539-30287.tif	2	20	26	yes	yes	0	0	30jul15_22jun15_G_m1_sp1_4_rev.tif	22jun15_G_m1	G male	G	male	Dom	M.musculus	30jul15_22jun15_G_m1_sp1_4_rev.tif_Batch0
Batch0		20aug15_22jun15_G_m1_sp2_11_rev.tif	9854-29688-16264.tif	2	20	27	no	yes	0	0	20aug15_22jun15_G_m1_sp2_11_rev.tif	22jun15_G_m1	G male	G	male	Dom	M.musculus	20aug15_22jun15_G_m1_sp2_11_rev.tif_Batch0
Batch0		20aug15_22jun15_G_m1_sp2_12_rev.tif	24589-22348-32724.tif	2	20	21	no	yes	0	0	20aug15_22jun15_G_m1_sp2_12_rev.tif	22jun15_G_m1	G male	G	male	Dom	M.musculus	20aug15_22jun15_G_m1_sp2_12_rev.tif_Batch0
Batch0		28jul15_22jun15_G_m2_sp1_11_rev.tif	6462-758-29063.tif	2	20	23	yes	yes	0	0	28jul15_22jun15_G_m2_sp1_11_rev.tif	22jun15_G_m2	G male	G	male	Dom	M.musculus	28jul15_22jun15_G_m2_sp1_11_rev.tif_Batch0
Batch0		28jul15_22jun15_G_m2_sp1_12.1_rev.tif	12057-30016-5671.tif	2	20	23	no	1 CO	0	0	28jul15_22jun15_G_m2_sp1_12.1_rev.tif	22jun15_G_m2	G male	G	male	Dom	M.musculus	28jul15_22jun15_G_m2_sp1_12.1_rev.tif_Batch0
Batch0		28jul15_22jun15_G_m2_sp1_6.1_rev.tif	6953-5474-20672.tif	2	20	23	yes	yes	0	0	28jul15_22jun15_G_m2_sp1_6.1_rev.tif	22jun15_G_m2	G male	G	male	Dom	M.musculus	28jul15_22jun15_G_m2_sp1_6.1_rev.tif_Batch0
Batch0		27jul15_22jun15_G_m2_sp1_6_rev.tif	25252-16339-29574.tif	2	20	24	yes	yes	0	0	27jul15_22jun15_G_m2_sp1_6_rev.tif	22jun15_G_m2	G male	G	male	Dom	M.musculus	27jul15_22jun15_G_m2_sp1_6_rev.tif_Batch0
Batch0		9mar16_22feb16_G_m1_sp1_10_rev.tif	1884-17293-28239.tif	2	20	23	no	no	1	0	9mar16_22feb16_G_m1_sp1_10_rev.tif	22feb16_G_m1	G male	G	male	Dom	M.musculus	9mar16_22feb16_G_m1_sp1_10_rev.tif_Batch0
Batch0		9mar16_22feb16_G_m1_sp1_17_rev.tif	15959-17138-23367.tif	2	20	26	no	yes	1	0	9mar16_22feb16_G_m1_sp1_17_rev.tif	22feb16_G_m1	G male	G	male	Dom	M.musculus	9mar16_22feb16_G_m1_sp1_17_rev.tif_Batch0
Batch0		20aug15_22jun15_G_m1_sp2_13_rev.tif	20830-22923-28694.tif	2	20	21	no	yes	1	0	20aug15_22jun15_G_m1_sp2_13_rev.tif	22jun15_G_m1	G male	G	male	Dom	M.musculus	20aug15_22jun15_G_m1_sp2_13_rev.tif_Batch0
Batch0		20aug15_22jun15_G_m1_sp2_3_rev.tif	12344-9547-17770.tif	2	20	22	no	yes	1	0	20aug15_22jun15_G_m1_sp2_3_rev.tif	22jun15_G_m1	G male	G	male	Dom	M.musculus	20aug15_22jun15_G_m1_sp2_3_rev.tif_Batch0
Batch1		1oct16_1apr16_G_m4_sp1_1.2_rev.tif	3314-4769-23468.tif	2	20	24	no	y	1	0	1oct16_1apr16_G_m4_sp1_1.2_rev.tif	1apr16_G_m4	G male	G	male	Dom	M.musculus	1oct16_1apr16_G_m4_sp1_1.2_rev.tif_Batch1
Batch1		1oct16_1apr16_G_m4_sp1_2_rev.tif	6326-26055-19449.tif	2	20	27	no	y	0	0	1oct16_1apr16_G_m4_sp1_2_rev.tif	1apr16_G_m4	G male	G	male	Dom	M.musculus	1oct16_1apr16_G_m4_sp1_2_rev.tif_Batch1
Batch1		1oct16_1apr16_G_m4_sp1_7_rev.tif	5765-1944-30687.tif	2	20	23	no	y	0	0	1oct16_1apr16_G_m4_sp1_7_rev.tif	1apr16_G_m4	G male	G	male	Dom	M.musculus	1oct16_1apr16_G_m4_sp1_7_rev.tif_Batch1
Batch13		29mar15_25sep14_G_m1_sp2_2_rev.tif	4268-2860-12762.tif	2	20	23	no	yes	0	0	29mar15_25sep14_G_m1_sp2_2_rev.tif	25sep14_G_m1	G male	G	male	Dom	M.musculus	29mar15_25sep14_G_m1_sp2_2_rev.tif_Batch13
Batch13		23mar15_14mar15_G_m1_sp1_4.1_rev.tif	32203-30221-8438.tif	2	20	21	no	yes	1	0	23mar15_14mar15_G_m1_sp1_4.1_rev.tif	14mar15_G_m1	G male	G	male	Dom	M.musculus	23mar15_14mar15_G_m1_sp1_4.1_rev.tif_Batch13
Batch13		14feb15_30sep14_G_m2_sp2_25_rev.tif	29797-5775-15306.tif	2	20	23	yes (slight bottom)	yes	0	0	14feb15_30sep14_G_m2_sp2_25_rev.tif	30sep14_G_m2	G male	G	male	Dom	M.musculus	14feb15_30sep14_G_m2_sp2_25_rev.tif_Batch13
Batch13		23mar15_14mar15_G_m1_sp1_29_rev.tif	28767-2294-3069.tif	2	20	21	no	yes	1	0	23mar15_14mar15_G_m1_sp1_29_rev.tif	14mar15_G_m1	G male	G	male	Dom	M.musculus	23mar15_14mar15_G_m1_sp1_29_rev.tif_Batch13
Batch13		12may15_25sep14_G_m1_sp2_9_rev.tif	28221-6888-25489.tif	2	20	29	no	yes	0	0	12may15_25sep14_G_m1_sp2_9_rev.tif	25sep14_G_m1	G male	G	male	Dom	M.musculus	12may15_25sep14_G_m1_sp2_9_rev.tif_Batch13
Batch13		23mar15_14mar15_G_m1_sp1_33_rev.tif	22822-23729-29961.tif	2	20	23	yes (bottom)	yes	1	0	23mar15_14mar15_G_m1_sp1_33_rev.tif	14mar15_G_m1	G male	G	male	Dom	M.musculus	23mar15_14mar15_G_m1_sp1_33_rev.tif_Batch13
Batch13		23mar15_14mar15_G_m1_sp1_23_rev.tif	22199-25623-30720.tif	2	20	22	no	yes	0	0	23mar15_14mar15_G_m1_sp1_23_rev.tif	14mar15_G_m1	G male	G	male	Dom	M.musculus	23mar15_14mar15_G_m1_sp1_23_rev.tif_Batch13
Batch13		23mar15_14mar15_G_m1_sp1_25.2_rev.tif	21106-29227-21729.tif	2	20	21	no	yes	2	0	23mar15_14mar15_G_m1_sp1_25.2_rev.tif	14mar15_G_m1	G male	G	male	Dom	M.musculus	23mar15_14mar15_G_m1_sp1_25.2_rev.tif_Batch13
Batch13		21mar15_14mar15_G_m2_sp1_1_rev.tif	19996-1390-16200.tif	2	20	22	no	yes	0	0	21mar15_14mar15_G_m2_sp1_1_rev.tif	14mar15_G_m2	G male	G	male	Dom	M.musculus	21mar15_14mar15_G_m2_sp1_1_rev.tif_Batch13
Batch13		23mar15_14mar15_G_m1_sp1_22.2_rev.tif	17869-30204-30988.tif	2	20	23	no	yes	0	0	23mar15_14mar15_G_m1_sp1_22.2_rev.tif	14mar15_G_m1	G male	G	male	Dom	M.musculus	23mar15_14mar15_G_m1_sp1_22.2_rev.tif_Batch13
Batch13		23mar15_14mar15_G_m1_sp1_24.3_rev.tif	17019-19288-9973.tif	2	20	22	yes (crop top left)	yes	0	0	23mar15_14mar15_G_m1_sp1_24.3_rev.tif	14mar15_G_m1	G male	G	male	Dom	M.musculus	23mar15_14mar15_G_m1_sp1_24.3_rev.tif_Batch13
Batch13		23mar15_14mar15_G_m1_sp1_5_rev.tif	1498-1091-10237.tif	2	20	22	no	yes	0	0	23mar15_14mar15_G_m1_sp1_5_rev.tif	14mar15_G_m1	G male	G	male	Dom	M.musculus	23mar15_14mar15_G_m1_sp1_5_rev.tif_Batch13
Batch13		23mar15_14mar15_G_m1_sp1_9_rev.tif	14409-27038-13391.tif	2	20	21	yes (bottom right)	yes	0	0	23mar15_14mar15_G_m1_sp1_9_rev.tif	14mar15_G_m1	G male	G	male	Dom	M.musculus	23mar15_14mar15_G_m1_sp1_9_rev.tif_Batch13
Batch13		29mar15_25sep14_G_m1_sp2_3_rev.tif	13809-20787-6410.tif	2	20	26	no	yes	1	0	29mar15_25sep14_G_m1_sp2_3_rev.tif	25sep14_G_m1	G male	G	male	Dom	M.musculus	29mar15_25sep14_G_m1_sp2_3_rev.tif_Batch13
Batch13		23mar15_14mar15_G_m1_sp1_32_rev.tif	13558-15467-27989.tif	2	20	23	yes (bottom right)	yes	0	0	23mar15_14mar15_G_m1_sp1_32_rev.tif	14mar15_G_m1	G male	G	male	Dom	M.musculus	23mar15_14mar15_G_m1_sp1_32_rev.tif_Batch13
Batch13		29mar15_25sep14_G_m1_sp2_7_rev.tif	13192-12605-11886.tif	2	20	23	no	yes	0	0	29mar15_25sep14_G_m1_sp2_7_rev.tif	25sep14_G_m1	G male	G	male	Dom	M.musculus	29mar15_25sep14_G_m1_sp2_7_rev.tif_Batch13
Batch13		21mar15_14mar15_G_m2_sp1_11_rev.tif	10184-19339-29611.tif	2	20	21	no	no	0	0	21mar15_14mar15_G_m2_sp1_11_rev.tif	14mar15_G_m2	G male	G	male	Dom	M.musculus	21mar15_14mar15_G_m2_sp1_11_rev.tif_Batch13
Batch3		1mar16_3jan16_G_m2_sp1_11.1_rev.tif	7324-3311-7042.tif	2	20	20		y	0	0	1mar16_3jan16_G_m2_sp1_11.1_rev.tif	3jan16_G_m2	G male	G	male	Dom	M.musculus	1mar16_3jan16_G_m2_sp1_11.1_rev.tif_Batch3
Batch3		1mar16_3jan16_G_m2_sp1_19.1_rev.tif	665-23065-8671.tif	2	20	27	y	y	0	0	1mar16_3jan16_G_m2_sp1_19.1_rev.tif	3jan16_G_m2	G male	G	male	Dom	M.musculus	1mar16_3jan16_G_m2_sp1_19.1_rev.tif_Batch3
Batch3		1mar16_3jan16_G_m2_sp1_19.2_rev.tif	11946-12071-32642.tif	2	20	22	yes	y	0	0	1mar16_3jan16_G_m2_sp1_19.2_rev.tif	3jan16_G_m2	G male	G	male	Dom	M.musculus	1mar16_3jan16_G_m2_sp1_19.2_rev.tif_Batch3
Batch3		1mar16_3jan16_G_m2_sp1_3_rev.tif	24029-8794-1990.tif	2	20	24		y	0	0	1mar16_3jan16_G_m2_sp1_3_rev.tif	3jan16_G_m2	G male	G	male	Dom	M.musculus	1mar16_3jan16_G_m2_sp1_3_rev.tif_Batch3
Batch3		1mar16_3jan16_G_m2_sp1_4_rev.tif	6793-17948-20734.tif	2	20	20		y	1	0	1mar16_3jan16_G_m2_sp1_4_rev.tif	3jan16_G_m2	G male	G	male	Dom	M.musculus	1mar16_3jan16_G_m2_sp1_4_rev.tif_Batch3
Batch9		27mar16_6mar16_G_m3_sp1_17.1_rev.tif	10744-10810-30230.tif	2	20	25	no	yes	0	0	27mar16_6mar16_G_m3_sp1_17.1_rev.tif	6mar16_G_m3	G male	G	male	Dom	M.musculus	27mar16_6mar16_G_m3_sp1_17.1_rev.tif_Batch9
Batch9		10jun15_24mar15_G_m1_sp1_13_rev.tif	17460-5121-1793.tif	2	20	23	no	yes	1	0	10jun15_24mar15_G_m1_sp1_13_rev.tif	24mar15_G_m1	G male	G	male	Dom	M.musculus	10jun15_24mar15_G_m1_sp1_13_rev.tif_Batch9
Batch9		10jun15_24mar15_G_m1_sp1_31_rev.tif	18160-28159-2766.tif	2	20	23	no	yes	0	0	10jun15_24mar15_G_m1_sp1_31_rev.tif	24mar15_G_m1	G male	G	male	Dom	M.musculus	10jun15_24mar15_G_m1_sp1_31_rev.tif_Batch9
Batch9		27mar16_6mar16_G_m3_sp1_18.2_rev.tif	18868-21583-31783.tif	2	20	26	yes	yes	0	0	27mar16_6mar16_G_m3_sp1_18.2_rev.tif	6mar16_G_m3	G male	G	male	Dom	M.musculus	27mar16_6mar16_G_m3_sp1_18.2_rev.tif_Batch9
Batch9		10jun15_24mar15_G_m1_sp1_12_rev.tif	19281-21112-18146.tif	2	20	22	no	yes	0	0	10jun15_24mar15_G_m1_sp1_12_rev.tif	24mar15_G_m1	G male	G	male	Dom	M.musculus	10jun15_24mar15_G_m1_sp1_12_rev.tif_Batch9
Batch9		10jun15_24mar15_G_m1_sp1_28_rev.tif	19875-31072-5839.tif	2	20	20	no	yes	0	0	10jun15_24mar15_G_m1_sp1_28_rev.tif	24mar15_G_m1	G male	G	male	Dom	M.musculus	10jun15_24mar15_G_m1_sp1_28_rev.tif_Batch9
Batch9		27mar16_6mar16_G_m3_sp1_7_rev.tif	20152-11546-26054.tif	2	20	21	no	yes	0	0	27mar16_6mar16_G_m3_sp1_7_rev.tif	6mar16_G_m3	G male	G	male	Dom	M.musculus	27mar16_6mar16_G_m3_sp1_7_rev.tif_Batch9
Batch9		10jun15_24mar15_G_m1_sp1_16.2_rev.tif	23318-27125-15556.tif	2	20	22	no	yes	0	0	10jun15_24mar15_G_m1_sp1_16.2_rev.tif	24mar15_G_m1	G male	G	male	Dom	M.musculus	10jun15_24mar15_G_m1_sp1_16.2_rev.tif_Batch9
Batch9		10jun15_24mar15_G_m1_sp1_6_rev.tif	26646-13086-30587.tif	2	20	22	no	yes	0	0	10jun15_24mar15_G_m1_sp1_6_rev.tif	24mar15_G_m1	G male	G	male	Dom	M.musculus	10jun15_24mar15_G_m1_sp1_6_rev.tif_Batch9
Batch9		10jun15_24mar15_G_m1_sp1_19.2_rev.tif	27068-8985-18885.tif	2	20	21	no	yes	0	0	10jun15_24mar15_G_m1_sp1_19.2_rev.tif	24mar15_G_m1	G male	G	male	Dom	M.musculus	10jun15_24mar15_G_m1_sp1_19.2_rev.tif_Batch9
Batch9		10jun15_24mar15_G_m1_sp1_4_rev.tif	27323-21217-1473.tif	2	20	25	no	yes	0	0	10jun15_24mar15_G_m1_sp1_4_rev.tif	24mar15_G_m1	G male	G	male	Dom	M.musculus	10jun15_24mar15_G_m1_sp1_4_rev.tif_Batch9
Batch9		27mar16_6mar16_G_m3_sp1_6.2_rev.tif	27939-7005-26126.tif	2	20	28	no	yes	0	0	27mar16_6mar16_G_m3_sp1_6.2_rev.tif	6mar16_G_m3	G male	G	male	Dom	M.musculus	27mar16_6mar16_G_m3_sp1_6.2_rev.tif_Batch9
Batch9		10jun15_24mar15_G_m1_sp1_30_rev.tif	29699-528-19439.tif	2	20	24	no	yes	1	0	10jun15_24mar15_G_m1_sp1_30_rev.tif	24mar15_G_m1	G male	G	male	Dom	M.musculus	10jun15_24mar15_G_m1_sp1_30_rev.tif_Batch9
Batch9		10jun15_24mar15_G_m1_sp1_18_rev.tif	31557-15209-26292.tif	2	20	21	yes	yes	0	0	10jun15_24mar15_G_m1_sp1_18_rev.tif	24mar15_G_m1	G male	G	male	Dom	M.musculus	10jun15_24mar15_G_m1_sp1_18_rev.tif_Batch9
Batch9		10jun15_24mar15_G_m1_sp1_11_rev.tif	32232-21602-1287.tif	2	20	21	yes	yes	1	0	10jun15_24mar15_G_m1_sp1_11_rev.tif	24mar15_G_m1	G male	G	male	Dom	M.musculus	10jun15_24mar15_G_m1_sp1_11_rev.tif_Batch9
Batch9		27mar16_6mar16_G_m3_sp1_10.1_rev.tif	4708-10888-23605.tif	2	20	25	no	yes	0	0	27mar16_6mar16_G_m3_sp1_10.1_rev.tif	6mar16_G_m3	G male	G	male	Dom	M.musculus	27mar16_6mar16_G_m3_sp1_10.1_rev.tif_Batch9
Batch9		10jun15_24mar15_G_m1_sp1_7_rev.tif	5241-12273-13344.tif	2	20	22	no	yes	0	0	10jun15_24mar15_G_m1_sp1_7_rev.tif	24mar15_G_m1	G male	G	male	Dom	M.musculus	10jun15_24mar15_G_m1_sp1_7_rev.tif_Batch9
Batch9		10jun15_24mar15_G_m1_sp1_9_rev.tif	6201-24417-5744.tif	2	20	21	no	yes	0	0	10jun15_24mar15_G_m1_sp1_9_rev.tif	24mar15_G_m1	G male	G	male	Dom	M.musculus	10jun15_24mar15_G_m1_sp1_9_rev.tif_Batch9
Batch9		27mar16_6mar16_G_m3_sp1_15.2_rev.tif	624-28427-769.tif	2	20	21	no	yes	0	0	27mar16_6mar16_G_m3_sp1_15.2_rev.tif	6mar16_G_m3	G male	G	male	Dom	M.musculus	27mar16_6mar16_G_m3_sp1_15.2_rev.tif_Batch9
Batch9		10jun15_24mar15_G_m1_sp1_14_rev.tif	6584-9629-24646.tif	2	20	23	no	no	0	0	10jun15_24mar15_G_m1_sp1_14_rev.tif	24mar15_G_m1	G male	G	male	Dom	M.musculus	10jun15_24mar15_G_m1_sp1_14_rev.tif_Batch9
Batch9		10jun15_24mar15_G_m1_sp1_29_rev.tif	7103-30628-23682.tif	2	20	21	no	yes	0	0	10jun15_24mar15_G_m1_sp1_29_rev.tif	24mar15_G_m1	G male	G	male	Dom	M.musculus	10jun15_24mar15_G_m1_sp1_29_rev.tif_Batch9
Batch9		10jun15_24mar15_G_m1_sp1_24_rev.tif	94-15018-32670.tif	2	20	22	yes	no	0	0	10jun15_24mar15_G_m1_sp1_24_rev.tif	24mar15_G_m1	G male	G	male	Dom	M.musculus	10jun15_24mar15_G_m1_sp1_24_rev.tif_Batch9
Batch16		2apr15_30sep14_G_m5_sp2_3_rev.tif	22460-30713-26279.tif	2	20	22	no	no	1	0	2apr15_30sep14_G_m5_sp2_3_rev.tif	30sep14_G_m5	G male	G	male	Dom	M.musculus	2apr15_30sep14_G_m5_sp2_3_rev.tif_Batch16
Batch16		2apr15_30sep14_G_m5_sp1_9_rev.tif	26756-19458-4357.tif	2	20	21	yes	yes	2	1	2apr15_30sep14_G_m5_sp1_9_rev.tif	30sep14_G_m5	G male	G	male	Dom	M.musculus	2apr15_30sep14_G_m5_sp1_9_rev.tif_Batch16
Batch16		2apr15_30sep14_G_m5_sp1_8_rev.tif	6646-24371-1548.tif	2	20	26	no	yes	1	0	2apr15_30sep14_G_m5_sp1_8_rev.tif	30sep14_G_m5	G male	G	male	Dom	M.musculus	2apr15_30sep14_G_m5_sp1_8_rev.tif_Batch16
Batch16		2apr15_30sep14_G_m5_sp1_7_rev.tif	3545-180-18304.tif	2	20	25	no	yes	0	0	2apr15_30sep14_G_m5_sp1_7_rev.tif	30sep14_G_m5	G male	G	male	Dom	M.musculus	2apr15_30sep14_G_m5_sp1_7_rev.tif_Batch16
Batch16		27mar16_6mar16_G_m2_sp1_8.1_rev.tif	3363-10735-9313.tif	2	20	20	no	yes	1	0	27mar16_6mar16_G_m2_sp1_8.1_rev.tif	6mar16_G_m2	G male	G	male	Dom	M.musculus	27mar16_6mar16_G_m2_sp1_8.1_rev.tif_Batch16
Batch16		27mar16_6mar16_G_m2_sp1_3.2_rev.tif	6720-16155-8163.tif	2	20	23	no	yes	1	0	27mar16_6mar16_G_m2_sp1_3.2_rev.tif	6mar16_G_m2	G male	G	male	Dom	M.musculus	27mar16_6mar16_G_m2_sp1_3.2_rev.tif_Batch16
Batch16		27mar16_6mar16_G_m2_sp1_3.1_rev.tif	23889-467-25578.tif	2	20	23	no	yes	0	0	27mar16_6mar16_G_m2_sp1_3.1_rev.tif	6mar16_G_m2	G male	G	male	Dom	M.musculus	27mar16_6mar16_G_m2_sp1_3.1_rev.tif_Batch16
Batch16		14feb15_30sep14_G_m3_sp2_20_rev.tif	14772-1960-7654.tif	2	20	25	yes	yes	1	0	14feb15_30sep14_G_m3_sp2_20_rev.tif	30sep14_G_m3	G male	G	male	Dom	M.musculus	14feb15_30sep14_G_m3_sp2_20_rev.tif_Batch16
Batch16		13feb15_30sep14_G_m3_sp2_9_rev.tif	20123-22939-22400.tif	2	20	25	no	yes	0	0	13feb15_30sep14_G_m3_sp2_9_rev.tif	30sep14_G_m3	G male	G	male	Dom	M.musculus	13feb15_30sep14_G_m3_sp2_9_rev.tif_Batch16
Batch16		12may15_30sep14_G_m5_sp1_24_rev.tif	3468-15614-18085.tif	2	20	27	no	yes	0	0	12may15_30sep14_G_m5_sp1_24_rev.tif	30sep14_G_m5	G male	G	male	Dom	M.musculus	12may15_30sep14_G_m5_sp1_24_rev.tif_Batch16
Batch16		12may15_30sep14_G_m5_sp1_22_rev.tif	1081-23992-27429.tif	2	20	25	no	yes	0	1	12may15_30sep14_G_m5_sp1_22_rev.tif	30sep14_G_m5	G male	G	male	Dom	M.musculus	12may15_30sep14_G_m5_sp1_22_rev.tif_Batch16
Batch16		12may15_30sep14_G_m5_sp1_19_rev.tif	29105-16971-29900.tif	2	20	22	no	yes	2	0	12may15_30sep14_G_m5_sp1_19_rev.tif	30sep14_G_m5	G male	G	male	Dom	M.musculus	12may15_30sep14_G_m5_sp1_19_rev.tif_Batch16
Batch16		12may15_30sep14_G_m5_sp1_18_rev.tif	17338-24932-27602.tif	2	20	22	yes	yes	1	0	12may15_30sep14_G_m5_sp1_18_rev.tif	30sep14_G_m5	G male	G	male	Dom	M.musculus	12may15_30sep14_G_m5_sp1_18_rev.tif_Batch16
Batch16		12may15_30sep14_G_m5_sp1_12_rev.tif	23919-6012-9494.tif	2	20	25	no	yes	1	0	12may15_30sep14_G_m5_sp1_12_rev.tif	30sep14_G_m5	G male	G	male	Dom	M.musculus	12may15_30sep14_G_m5_sp1_12_rev.tif_Batch16
Batch16		11jan15_30sep14_G_m1_sp1_2_rev.tif	27314-17653-26176.tif	2	20	20	no	yes	1	0	11jan15_30sep14_G_m1_sp1_2_rev.tif	30sep14_G_m1	G male	G	male	Dom	M.musculus	11jan15_30sep14_G_m1_sp1_2_rev.tif_Batch16
Batch7		29dec17_4dec17_HMI_m1_sp1_1_rev.tif	9643-10951-20672.tif	2	20	18	yes				29dec17_4dec17_HMI_m1_sp1_1_rev.tif	4dec17_HMI_m1	HMI male	HMI	male	Cast	M.musculus	29dec17_4dec17_HMI_m1_sp1_1_rev.tif_Batch7
Batch7		29dec17_4dec17_HMI_m1_sp1_19.1_rev.tif	31348-30781-5667.tif	2	20	25	no	yes	0	0	29dec17_4dec17_HMI_m1_sp1_19.1_rev.tif	4dec17_HMI_m1	HMI male	HMI	male	Cast	M.musculus	29dec17_4dec17_HMI_m1_sp1_19.1_rev.tif_Batch7
Batch7		29dec17_4dec17_HMI_m1_sp1_4.1_rev.tif	4780-171-24271.tif	2	20	25	no	yes	0	0	29dec17_4dec17_HMI_m1_sp1_4.1_rev.tif	4dec17_HMI_m1	HMI male	HMI	male	Cast	M.musculus	29dec17_4dec17_HMI_m1_sp1_4.1_rev.tif_Batch7
Batch7		29dec17_4dec17_HMI_m1_sp1_11_rev.tif	9873-6265-2668.tif	2	20	25	n	y	0	0	29dec17_4dec17_HMI_m1_sp1_11_rev.tif	4dec17_HMI_m1	HMI male	HMI	male	Cast	M.musculus	29dec17_4dec17_HMI_m1_sp1_11_rev.tif_Batch7
Batch7		29dec17_4dec17_HMI_m1_sp1_31_rev.tif	20425-20846-12797.tif	2	20	26	n	y	0	0	29dec17_4dec17_HMI_m1_sp1_31_rev.tif	4dec17_HMI_m1	HMI male	HMI	male	Cast	M.musculus	29dec17_4dec17_HMI_m1_sp1_31_rev.tif_Batch7
Batch7		29dec17_4dec17_HMI_m1_sp1_33.1_rev.tif	8561-3529-2516.tif	2	20	29	n	yes	0	0	29dec17_4dec17_HMI_m1_sp1_33.1_rev.tif	4dec17_HMI_m1	HMI male	HMI	male	Cast	M.musculus	29dec17_4dec17_HMI_m1_sp1_33.1_rev.tif_Batch7
Batch11		3sep18_27aug18_HMI_m1_sp1_28.1_rev.tif	1450-31357-8511.tif	2	20	23	no	yes	0	0	3sep18_27aug18_HMI_m1_sp1_28.1_rev.tif	27aug18_HMI_m1	HMI male	HMI	male	Cast	M.musculus	3sep18_27aug18_HMI_m1_sp1_28.1_rev.tif_Batch11
batch10		16feb18_1feb18_KAZ_f4_sp1_18_rev.tif	11048-4228-32074.tif	2	20	22	no		1	3	16feb18_1feb18_KAZ_f4_sp1_18_rev.tif	1feb18_KAZ_f4	KAZ female	KAZ	female	Musc	M.musculus	16feb18_1feb18_KAZ_f4_sp1_18_rev.tif_batch10
batch10		16feb18_1feb18_KAZ_f4_sp1_23_rev.tif	15211-13915-26099.tif	2	20	22	no		1	0	16feb18_1feb18_KAZ_f4_sp1_23_rev.tif	1feb18_KAZ_f4	KAZ female	KAZ	female	Musc	M.musculus	16feb18_1feb18_KAZ_f4_sp1_23_rev.tif_batch10
batch10		8feb18_1feb18_KAZ_f1_sp1_11_rev.tif	19491-20105-1748.tif	2	20	23	no		0	0	8feb18_1feb18_KAZ_f1_sp1_11_rev.tif	1feb18_KAZ_f1	KAZ female	KAZ	female	Musc	M.musculus	8feb18_1feb18_KAZ_f1_sp1_11_rev.tif_batch10
batch10		16feb18_1feb18_KAZ_f2_sp1_5.1_rev.tif	20239-11763-19278.tif	2	20	23	no		0	0	16feb18_1feb18_KAZ_f2_sp1_5.1_rev.tif	1feb18_KAZ_f2	KAZ female	KAZ	female	Musc	M.musculus	16feb18_1feb18_KAZ_f2_sp1_5.1_rev.tif_batch10
batch10		16feb18_1feb18_KAZ_f2_sp1_1_rev.tif	2594-8132-8825.tif	2	20	24	no		0	1	16feb18_1feb18_KAZ_f2_sp1_1_rev.tif	1feb18_KAZ_f2	KAZ female	KAZ	female	Musc	M.musculus	16feb18_1feb18_KAZ_f2_sp1_1_rev.tif_batch10
batch10		16feb18_1feb18_KAZ_f2_sp1_26_rev.tif	26076-30148-23443.tif	2	20	24	no		0	2	16feb18_1feb18_KAZ_f2_sp1_26_rev.tif	1feb18_KAZ_f2	KAZ female	KAZ	female	Musc	M.musculus	16feb18_1feb18_KAZ_f2_sp1_26_rev.tif_batch10
batch10		8feb18_1feb18_KAZ_f1_sp1_20_rev.tif	3053-2632-4327.tif	2	20	26	no		1	0	8feb18_1feb18_KAZ_f1_sp1_20_rev.tif	1feb18_KAZ_f1	KAZ female	KAZ	female	Musc	M.musculus	8feb18_1feb18_KAZ_f1_sp1_20_rev.tif_batch10
batch10		8feb18_1feb18_KAZ_f1_sp1_4_rev.tif	12225-28054-22264.tif	2	20	27	no		0	0	8feb18_1feb18_KAZ_f1_sp1_4_rev.tif	1feb18_KAZ_f1	KAZ female	KAZ	female	Musc	M.musculus	8feb18_1feb18_KAZ_f1_sp1_4_rev.tif_batch10
batch10		16feb18_1feb18_KAZ_f4_sp1_19_rev.tif	13208-24896-21309.tif	2	20	27	no		0	0	16feb18_1feb18_KAZ_f4_sp1_19_rev.tif	1feb18_KAZ_f4	KAZ female	KAZ	female	Musc	M.musculus	16feb18_1feb18_KAZ_f4_sp1_19_rev.tif_batch10
batch10		16feb18_1feb18_KAZ_f4_sp1_4_rev.tif	161-15588-7974.tif	2	20	27	no		1	1	16feb18_1feb18_KAZ_f4_sp1_4_rev.tif	1feb18_KAZ_f4	KAZ female	KAZ	female	Musc	M.musculus	16feb18_1feb18_KAZ_f4_sp1_4_rev.tif_batch10
batch10		16feb18_1feb18_KAZ_f4_sp1_25_rev.tif	26199-15181-24411.tif	2	20	27	no		1	1	16feb18_1feb18_KAZ_f4_sp1_25_rev.tif	1feb18_KAZ_f4	KAZ female	KAZ	female	Musc	M.musculus	16feb18_1feb18_KAZ_f4_sp1_25_rev.tif_batch10
batch10		16feb18_1feb18_KAZ_f2_sp1_16_rev.tif	1079-8242-4681.tif	2	20	29	no		1	1	16feb18_1feb18_KAZ_f2_sp1_16_rev.tif	1feb18_KAZ_f2	KAZ female	KAZ	female	Musc	M.musculus	16feb18_1feb18_KAZ_f2_sp1_16_rev.tif_batch10
batch10		16feb18_1feb18_KAZ_f4_sp1_3_rev.tif	1347-8055-12915.tif	2	20	30	no		0	0	16feb18_1feb18_KAZ_f4_sp1_3_rev.tif	1feb18_KAZ_f4	KAZ female	KAZ	female	Musc	M.musculus	16feb18_1feb18_KAZ_f4_sp1_3_rev.tif_batch10
batch10		16feb18_1feb18_KAZ_f4_sp1_13_rev.tif	29841-484-13033.tif	2	20	30	no		2	2	16feb18_1feb18_KAZ_f4_sp1_13_rev.tif	1feb18_KAZ_f4	KAZ female	KAZ	female	Musc	M.musculus	16feb18_1feb18_KAZ_f4_sp1_13_rev.tif_batch10
batch10		8feb18_1feb18_KAZ_f1_sp1_21_rev.tif	30378-7280-6687.tif	2	20	30	no		0	1	8feb18_1feb18_KAZ_f1_sp1_21_rev.tif	1feb18_KAZ_f1	KAZ female	KAZ	female	Musc	M.musculus	8feb18_1feb18_KAZ_f1_sp1_21_rev.tif_batch10
batch10		16feb18_1feb18_KAZ_f4_sp1_5_rev.tif	20716-6372-13394.tif	2	20	31	no		1	1	16feb18_1feb18_KAZ_f4_sp1_5_rev.tif	1feb18_KAZ_f4	KAZ female	KAZ	female	Musc	M.musculus	16feb18_1feb18_KAZ_f4_sp1_5_rev.tif_batch10
batch10		16feb18_1feb18_KAZ_f4_sp1_20_rev.tif	1042-30512-2746.tif	2	20	33	no		0	2	16feb18_1feb18_KAZ_f4_sp1_20_rev.tif	1feb18_KAZ_f4	KAZ female	KAZ	female	Musc	M.musculus	16feb18_1feb18_KAZ_f4_sp1_20_rev.tif_batch10
batch10		8feb18_1feb18_KAZ_f1_sp1_16_rev.tif	27137-5429-27108.tif	2	20	35	no		0	0	8feb18_1feb18_KAZ_f1_sp1_16_rev.tif	1feb18_KAZ_f1	KAZ female	KAZ	female	Musc	M.musculus	8feb18_1feb18_KAZ_f1_sp1_16_rev.tif_batch10
batch12		5apr18_11jan18_KAZ_f2_sp1_1_rev.tif	4602-28646-16986.tif	2	20	22	no		0	0	5apr18_11jan18_KAZ_f2_sp1_1_rev.tif	11jan18_KAZ_f2	KAZ female	KAZ	female	Musc	M.musculus	5apr18_11jan18_KAZ_f2_sp1_1_rev.tif_batch12
batch12		5apr18_11jan18_KAZ_f2_sp1_2_rev.tif	14004-11646-7100.tif	2	20	22	no		0	0	5apr18_11jan18_KAZ_f2_sp1_2_rev.tif	11jan18_KAZ_f2	KAZ female	KAZ	female	Musc	M.musculus	5apr18_11jan18_KAZ_f2_sp1_2_rev.tif_batch12
batch12		7feb18_11jan18_KAZ_f3_sp1_19_rev.tif	12526-16406-7964.tif	2	20	23	no		1	1	7feb18_11jan18_KAZ_f3_sp1_19_rev.tif	11jan18_KAZ_f3	KAZ female	KAZ	female	Musc	M.musculus	7feb18_11jan18_KAZ_f3_sp1_19_rev.tif_batch12
batch12		7feb18_11jan18_KAZ_f3_sp1_1_rev.tif	8955-8501-758.tif	2	20	26	no		0	0	7feb18_11jan18_KAZ_f3_sp1_1_rev.tif	11jan18_KAZ_f3	KAZ female	KAZ	female	Musc	M.musculus	7feb18_11jan18_KAZ_f3_sp1_1_rev.tif_batch12
batch12		5apr18_11jan18_KAZ_f2_sp1_18_rev.tif	27062-29282-3944.tif	2	20	26	no		1	0	5apr18_11jan18_KAZ_f2_sp1_18_rev.tif	11jan18_KAZ_f2	KAZ female	KAZ	female	Musc	M.musculus	5apr18_11jan18_KAZ_f2_sp1_18_rev.tif_batch12
batch12		5apr18_11jan18_KAZ_f2_sp1_24_rev.tif	29192-21457-28519.tif	2	20	27	no		0	2	5apr18_11jan18_KAZ_f2_sp1_24_rev.tif	11jan18_KAZ_f2	KAZ female	KAZ	female	Musc	M.musculus	5apr18_11jan18_KAZ_f2_sp1_24_rev.tif_batch12
batch12		5apr18_11jan18_KAZ_f2_sp1_7_rev.tif	24387-30092-20853.tif	2	20	28	no		0	0	5apr18_11jan18_KAZ_f2_sp1_7_rev.tif	11jan18_KAZ_f2	KAZ female	KAZ	female	Musc	M.musculus	5apr18_11jan18_KAZ_f2_sp1_7_rev.tif_batch12
batch12		5apr18_11jan18_KAZ_f2_sp1_22_rev.tif	9288-30183-11328.tif	2	20	28	no		1	0	5apr18_11jan18_KAZ_f2_sp1_22_rev.tif	11jan18_KAZ_f2	KAZ female	KAZ	female	Musc	M.musculus	5apr18_11jan18_KAZ_f2_sp1_22_rev.tif_batch12
batch12		7feb18_11jan18_KAZ_f3_sp1_11_rev.tif	9848-21848-5443.tif	2	20	30	no		0	0	7feb18_11jan18_KAZ_f3_sp1_11_rev.tif	11jan18_KAZ_f3	KAZ female	KAZ	female	Musc	M.musculus	7feb18_11jan18_KAZ_f3_sp1_11_rev.tif_batch12
batch12		5apr18_11jan18_KAZ_f2_sp1_4_rev.tif	2147-14390-11820.tif	2	20	33	no		0	0	5apr18_11jan18_KAZ_f2_sp1_4_rev.tif	11jan18_KAZ_f2	KAZ female	KAZ	female	Musc	M.musculus	5apr18_11jan18_KAZ_f2_sp1_4_rev.tif_batch12
batch12		7feb18_11jan18_KAZ_f3_sp1_8_rev.tif	29414-11294-3386.tif	2	20	34	no		0	0	7feb18_11jan18_KAZ_f3_sp1_8_rev.tif	11jan18_KAZ_f3	KAZ female	KAZ	female	Musc	M.musculus	7feb18_11jan18_KAZ_f3_sp1_8_rev.tif_batch12
Batch14		20apr18_11jan18_KAZ_f1_sp1_5_rev.tif	20027-29284-6094.tif	2	20	24	no		0	0	20apr18_11jan18_KAZ_f1_sp1_5_rev.tif	11jan18_KAZ_f1	KAZ female	KAZ	female	Musc	M.musculus	20apr18_11jan18_KAZ_f1_sp1_5_rev.tif_Batch14
Batch14		20apr18_11jan18_KAZ_f1_sp1_4_rev.tif	26290-22861-27997.tif	2	20	17	no		3	2	20apr18_11jan18_KAZ_f1_sp1_4_rev.tif	11jan18_KAZ_f1	KAZ female	KAZ	female	Musc	M.musculus	20apr18_11jan18_KAZ_f1_sp1_4_rev.tif_Batch14
Batch14		20apr18_11jan18_KAZ_f1_sp1_24.2_rev.tif	8326-24677-20697.tif	2	20	26	no		0	1	20apr18_11jan18_KAZ_f1_sp1_24.2_rev.tif	11jan18_KAZ_f1	KAZ female	KAZ	female	Musc	M.musculus	20apr18_11jan18_KAZ_f1_sp1_24.2_rev.tif_Batch14
Batch14		20apr18_11jan18_KAZ_f1_sp1_24.1_rev.tif	2394-11808-26736.tif	2	20	21	no		0	0	20apr18_11jan18_KAZ_f1_sp1_24.1_rev.tif	11jan18_KAZ_f1	KAZ female	KAZ	female	Musc	M.musculus	20apr18_11jan18_KAZ_f1_sp1_24.1_rev.tif_Batch14
Batch14		20apr18_11jan18_KAZ_f1_sp1_23_rev.tif	28670-3051-5786.tif	2	20	24	no		2	0	20apr18_11jan18_KAZ_f1_sp1_23_rev.tif	11jan18_KAZ_f1	KAZ female	KAZ	female	Musc	M.musculus	20apr18_11jan18_KAZ_f1_sp1_23_rev.tif_Batch14
Batch14		20apr18_11jan18_KAZ_f1_sp1_19_rev.tif	21192-21189-16285.tif	2	20	20	no		0	1	20apr18_11jan18_KAZ_f1_sp1_19_rev.tif	11jan18_KAZ_f1	KAZ female	KAZ	female	Musc	M.musculus	20apr18_11jan18_KAZ_f1_sp1_19_rev.tif_Batch14
Batch14		20apr18_11jan18_KAZ_f1_sp1_17_rev.tif	13641-1282-8393.tif	2	20	23	no		0	0	20apr18_11jan18_KAZ_f1_sp1_17_rev.tif	11jan18_KAZ_f1	KAZ female	KAZ	female	Musc	M.musculus	20apr18_11jan18_KAZ_f1_sp1_17_rev.tif_Batch14
Batch14		20apr18_11jan18_KAZ_f1_sp1_14_rev.tif	18734-30090-20895.tif	2	20	22	no		1	0	20apr18_11jan18_KAZ_f1_sp1_14_rev.tif	11jan18_KAZ_f1	KAZ female	KAZ	female	Musc	M.musculus	20apr18_11jan18_KAZ_f1_sp1_14_rev.tif_Batch14
Batch14		20apr18_11jan18_KAZ_f1_sp1_13_rev.tif	17354-26426-559.tif	2	20	24	no		1	0	20apr18_11jan18_KAZ_f1_sp1_13_rev.tif	11jan18_KAZ_f1	KAZ female	KAZ	female	Musc	M.musculus	20apr18_11jan18_KAZ_f1_sp1_13_rev.tif_Batch14
Batch14		1mar18_1feb18_KAZ_f3_sp1_7_rev.tif	11387-28180-17904.tif	2	20	21	no		0	0	1mar18_1feb18_KAZ_f3_sp1_7_rev.tif	1feb18_KAZ_f3	KAZ female	KAZ	female	Musc	M.musculus	1mar18_1feb18_KAZ_f3_sp1_7_rev.tif_Batch14
Batch14		1mar18_1feb18_KAZ_f3_sp1_5_rev.tif	20907-30561-159.tif	2	20	30	no		0	0	1mar18_1feb18_KAZ_f3_sp1_5_rev.tif	1feb18_KAZ_f3	KAZ female	KAZ	female	Musc	M.musculus	1mar18_1feb18_KAZ_f3_sp1_5_rev.tif_Batch14
Batch14		1mar18_1feb18_KAZ_f3_sp1_10_rev.tif	24400-10068-21515.tif	2	20	22	no		0	0	1mar18_1feb18_KAZ_f3_sp1_10_rev.tif	1feb18_KAZ_f3	KAZ female	KAZ	female	Musc	M.musculus	1mar18_1feb18_KAZ_f3_sp1_10_rev.tif_Batch14
Batch14		13apr18_1feb18_KAZ_f6_sp1_8_rev.tif	11113-10510-16162.tif	2	20	25	no		1	1	13apr18_1feb18_KAZ_f6_sp1_8_rev.tif	1feb18_KAZ_f6	KAZ female	KAZ	female	Musc	M.musculus	13apr18_1feb18_KAZ_f6_sp1_8_rev.tif_Batch14
Batch14		13apr18_1feb18_KAZ_f6_sp1_7_rev.tif	14210-15369-9421.tif	2	20	25	no		0	0	13apr18_1feb18_KAZ_f6_sp1_7_rev.tif	1feb18_KAZ_f6	KAZ female	KAZ	female	Musc	M.musculus	13apr18_1feb18_KAZ_f6_sp1_7_rev.tif_Batch14
Batch14		13apr18_1feb18_KAZ_f6_sp1_30_rev.tif	25851-12402-15146.tif	2	20	26	no		0	0	13apr18_1feb18_KAZ_f6_sp1_30_rev.tif	1feb18_KAZ_f6	KAZ female	KAZ	female	Musc	M.musculus	13apr18_1feb18_KAZ_f6_sp1_30_rev.tif_Batch14
Batch14		13apr18_1feb18_KAZ_f6_sp1_19_rev.tif	20251-31398-24207.tif	2	20	28	no		0	2	13apr18_1feb18_KAZ_f6_sp1_19_rev.tif	1feb18_KAZ_f6	KAZ female	KAZ	female	Musc	M.musculus	13apr18_1feb18_KAZ_f6_sp1_19_rev.tif_Batch14
Batch14		13apr18_1feb18_KAZ_f6_sp1_17_rev.tif	10558-13045-23450.tif	2	20	21	no		1	1	13apr18_1feb18_KAZ_f6_sp1_17_rev.tif	1feb18_KAZ_f6	KAZ female	KAZ	female	Musc	M.musculus	13apr18_1feb18_KAZ_f6_sp1_17_rev.tif_Batch14
Batch14		13apr18_1feb18_KAZ_f6_sp1_10_rev.tif	26069-28533-2994.tif	2	20	23	no		0	1	13apr18_1feb18_KAZ_f6_sp1_10_rev.tif	1feb18_KAZ_f6	KAZ female	KAZ	female	Musc	M.musculus	13apr18_1feb18_KAZ_f6_sp1_10_rev.tif_Batch14
Batch14		13apr18_1feb18_KAZ_f5_sp1_27_rev.tif	14489-19455-2334.tif	2	20	25	no		0	1	13apr18_1feb18_KAZ_f5_sp1_27_rev.tif	1feb18_KAZ_f5	KAZ female	KAZ	female	Musc	M.musculus	13apr18_1feb18_KAZ_f5_sp1_27_rev.tif_Batch14
Batch7		21nov17_7nov17_KAZ_m1_sp1_10_rev.tif	6160-9881-13010.tif	2	20	21	n	no	0	0	21nov17_7nov17_KAZ_m1_sp1_10_rev.tif	7nov17_KAZ_m1	KAZ male	KAZ	male	Musc	M.musculus	21nov17_7nov17_KAZ_m1_sp1_10_rev.tif_Batch7
Batch7		21nov17_7nov17_KAZ_m1_sp1_14.2_rev.tif	10918-3668-23477.tif	2	20	22	n	yes	0	0	21nov17_7nov17_KAZ_m1_sp1_14.2_rev.tif	7nov17_KAZ_m1	KAZ male	KAZ	male	Musc	M.musculus	21nov17_7nov17_KAZ_m1_sp1_14.2_rev.tif_Batch7
Batch7		21nov17_7nov17_KAZ_m1_sp1_20_rev.tif	1729-6681-16983.tif	2	20	22	no	yes	0	0	21nov17_7nov17_KAZ_m1_sp1_20_rev.tif	7nov17_KAZ_m1	KAZ male	KAZ	male	Musc	M.musculus	21nov17_7nov17_KAZ_m1_sp1_20_rev.tif_Batch7
Batch7		21nov17_7nov17_KAZ_m1_sp1_5_rev.tif	10758-17282-23090.tif	2	20	23	yes	n	0	0	21nov17_7nov17_KAZ_m1_sp1_5_rev.tif	7nov17_KAZ_m1	KAZ male	KAZ	male	Musc	M.musculus	21nov17_7nov17_KAZ_m1_sp1_5_rev.tif_Batch7
Batch7		21nov17_7nov17_KAZ_m1_sp1_6_rev.tif	27938-28163-16960.tif	2	20	24	n	y	0	0	21nov17_7nov17_KAZ_m1_sp1_6_rev.tif	7nov17_KAZ_m1	KAZ male	KAZ	male	Musc	M.musculus	21nov17_7nov17_KAZ_m1_sp1_6_rev.tif_Batch7
Batch7		21nov17_7nov17_KAZ_m1_sp1_7.1_rev.tif	29979-28997-5194.tif	2	20	24	no	yes	0	0	21nov17_7nov17_KAZ_m1_sp1_7.1_rev.tif	7nov17_KAZ_m1	KAZ male	KAZ	male	Musc	M.musculus	21nov17_7nov17_KAZ_m1_sp1_7.1_rev.tif_Batch7
Batch7		22dec17_4dec17_KAZ_m1_sp1_17_rev.tif	23272-11677-13006.tif	2	20	24	n	y	0	0	22dec17_4dec17_KAZ_m1_sp1_17_rev.tif	4dec17_KAZ_m1	KAZ male	KAZ	male	Musc	M.musculus	22dec17_4dec17_KAZ_m1_sp1_17_rev.tif_Batch7
Batch7		21nov17_7nov17_KAZ_m1_sp1_9_rev.tif	18796-26272-30876.tif	2	20	24	n	y	1	0	21nov17_7nov17_KAZ_m1_sp1_9_rev.tif	7nov17_KAZ_m1	KAZ male	KAZ	male	Musc	M.musculus	21nov17_7nov17_KAZ_m1_sp1_9_rev.tif_Batch7
Batch7		22dec17_4dec17_KAZ_m1_sp1_22_rev.tif	23595-3960-7666.tif	2	20	25	n	y	0	0	22dec17_4dec17_KAZ_m1_sp1_22_rev.tif	4dec17_KAZ_m1	KAZ male	KAZ	male	Musc	M.musculus	22dec17_4dec17_KAZ_m1_sp1_22_rev.tif_Batch7
Batch7		21nov17_7nov17_KAZ_m1_sp1_11.4_rev.tif	30031-29959-28358.tif	2	20	26	no	yrd	0	0	21nov17_7nov17_KAZ_m1_sp1_11.4_rev.tif	7nov17_KAZ_m1	KAZ male	KAZ	male	Musc	M.musculus	21nov17_7nov17_KAZ_m1_sp1_11.4_rev.tif_Batch7
Batch7		21nov17_7nov17_KAZ_m1_sp1_2.4_rev.tif	6238-15291-18230.tif	2	20	26	no	yes	0	0	21nov17_7nov17_KAZ_m1_sp1_2.4_rev.tif	7nov17_KAZ_m1	KAZ male	KAZ	male	Musc	M.musculus	21nov17_7nov17_KAZ_m1_sp1_2.4_rev.tif_Batch7
Batch7		21nov17_7nov17_KAZ_m1_sp1_18_rev.tif	10175-8704-12434.tif	2	20	26	n	y	0	0	21nov17_7nov17_KAZ_m1_sp1_18_rev.tif	7nov17_KAZ_m1	KAZ male	KAZ	male	Musc	M.musculus	21nov17_7nov17_KAZ_m1_sp1_18_rev.tif_Batch7
Batch7		21nov17_7nov17_KAZ_m1_sp1_12_rev.tif	3494-4346-6756.tif	2	20	27	n	yes	0	0	21nov17_7nov17_KAZ_m1_sp1_12_rev.tif	7nov17_KAZ_m1	KAZ male	KAZ	male	Musc	M.musculus	21nov17_7nov17_KAZ_m1_sp1_12_rev.tif_Batch7
Batch7		22dec17_4dec17_KAZ_m1_sp1_33.2_rev.tif	10932-27648-24355.tif	2	20	27	n	y	0	0	22dec17_4dec17_KAZ_m1_sp1_33.2_rev.tif	4dec17_KAZ_m1	KAZ male	KAZ	male	Musc	M.musculus	22dec17_4dec17_KAZ_m1_sp1_33.2_rev.tif_Batch7
Batch9		26jan18_11jan18_KAZ_m3_sp1_25.1_rev.tif	11262-30129-30239.tif	2	20	25	no	yes	0	0	26jan18_11jan18_KAZ_m3_sp1_25.1_rev.tif	11jan18_KAZ_m3	KAZ male	KAZ	male	Musc	M.musculus	26jan18_11jan18_KAZ_m3_sp1_25.1_rev.tif_Batch9
Batch9		16mar18_11jan18_KAZ_m1_sp1_4_rev.tif	1289-28559-13020.tif	2	20	20	no	yes	1	0	16mar18_11jan18_KAZ_m1_sp1_4_rev.tif	11jan18_KAZ_m1	KAZ male	KAZ	male	Musc	M.musculus	16mar18_11jan18_KAZ_m1_sp1_4_rev.tif_Batch9
Batch9		16mar18_11jan18_KAZ_m1_sp1_11.1_rev.tif	1362-1047-3640.tif	2	20	23	yes	yes	0	0	16mar18_11jan18_KAZ_m1_sp1_11.1_rev.tif	11jan18_KAZ_m1	KAZ male	KAZ	male	Musc	M.musculus	16mar18_11jan18_KAZ_m1_sp1_11.1_rev.tif_Batch9
Batch9		22feb18_1feb18_KAZ_m1_sp1_25.1_rev.tif	19730-755-31250.tif	2	20	22	no	yes	0	0	22feb18_1feb18_KAZ_m1_sp1_25.1_rev.tif	1feb18_KAZ_m1	KAZ male	KAZ	male	Musc	M.musculus	22feb18_1feb18_KAZ_m1_sp1_25.1_rev.tif_Batch9
Batch9		16mar18_11jan18_KAZ_m1_sp1_5.1_rev.tif	20617-12338-22741.tif	2	20	23	no	yes	0	0	16mar18_11jan18_KAZ_m1_sp1_5.1_rev.tif	11jan18_KAZ_m1	KAZ male	KAZ	male	Musc	M.musculus	16mar18_11jan18_KAZ_m1_sp1_5.1_rev.tif_Batch9
Batch9		26jan18_11jan18_KAZ_m3_sp1_15_rev.tif	23640-32696-16878.tif	2	20	22	no	yes	1	0	26jan18_11jan18_KAZ_m3_sp1_15_rev.tif	11jan18_KAZ_m3	KAZ male	KAZ	male	Musc	M.musculus	26jan18_11jan18_KAZ_m3_sp1_15_rev.tif_Batch9
Batch9		22feb18_1feb18_KAZ_m1_sp1_18_rev.tif	24272-123-28292.tif	2	20	20	no	yes	0	0	22feb18_1feb18_KAZ_m1_sp1_18_rev.tif	1feb18_KAZ_m1	KAZ male	KAZ	male	Musc	M.musculus	22feb18_1feb18_KAZ_m1_sp1_18_rev.tif_Batch9
Batch9		22feb18_1feb18_KAZ_m1_sp1_26.2_rev.tif	24652-15587-2205.tif	2	20	21	no	yes	0	0	22feb18_1feb18_KAZ_m1_sp1_26.2_rev.tif	1feb18_KAZ_m1	KAZ male	KAZ	male	Musc	M.musculus	22feb18_1feb18_KAZ_m1_sp1_26.2_rev.tif_Batch9
Batch9		26jan18_11jan18_KAZ_m3_sp1_14_rev.tif	26076-7262-9497.tif	2	20	22	no	yes	0	0	26jan18_11jan18_KAZ_m3_sp1_14_rev.tif	11jan18_KAZ_m3	KAZ male	KAZ	male	Musc	M.musculus	26jan18_11jan18_KAZ_m3_sp1_14_rev.tif_Batch9
Batch9		16mar18_11jan18_KAZ_m2_sp1_4_rev.tif	2629-19859-18190.tif	2	20	21	no	yes	1	0	16mar18_11jan18_KAZ_m2_sp1_4_rev.tif	11jan18_KAZ_m2	KAZ male	KAZ	male	Musc	M.musculus	16mar18_11jan18_KAZ_m2_sp1_4_rev.tif_Batch9
Batch9		22feb18_1feb18_KAZ_m1_sp1_23_rev.tif	26324-14019-19839.tif	2	20	24	no	yes	0	0	22feb18_1feb18_KAZ_m1_sp1_23_rev.tif	1feb18_KAZ_m1	KAZ male	KAZ	male	Musc	M.musculus	22feb18_1feb18_KAZ_m1_sp1_23_rev.tif_Batch9
Batch9		16mar18_11jan18_KAZ_m2_sp1_3_rev.tif	28921-13772-3791.tif	2	20	20	no	yes	2	0	16mar18_11jan18_KAZ_m2_sp1_3_rev.tif	11jan18_KAZ_m2	KAZ male	KAZ	male	Musc	M.musculus	16mar18_11jan18_KAZ_m2_sp1_3_rev.tif_Batch9
Batch9		22feb18_1feb18_KAZ_m1_sp1_6_rev.tif	29098-692-1669.tif	2	20	19	no	yes	2	0	22feb18_1feb18_KAZ_m1_sp1_6_rev.tif	1feb18_KAZ_m1	KAZ male	KAZ	male	Musc	M.musculus	22feb18_1feb18_KAZ_m1_sp1_6_rev.tif_Batch9
Batch9		26jan18_11jan18_KAZ_m3_sp1_5_rev.tif	29107-2066-27283.tif	2	20	21	no	no	2	0	26jan18_11jan18_KAZ_m3_sp1_5_rev.tif	11jan18_KAZ_m3	KAZ male	KAZ	male	Musc	M.musculus	26jan18_11jan18_KAZ_m3_sp1_5_rev.tif_Batch9
Batch9		7feb18_11jan18_KAZ_m4_sp1_28_rev.tif	32647-21391-11059.tif	2	20	24	no	yes	0	0	7feb18_11jan18_KAZ_m4_sp1_28_rev.tif	11jan18_KAZ_m4	KAZ male	KAZ	male	Musc	M.musculus	7feb18_11jan18_KAZ_m4_sp1_28_rev.tif_Batch9
Batch9		7feb18_11jan18_KAZ_m4_sp1_23_rev.tif	3905-22675-16318.tif	2	20	19	no	yes	0	0	7feb18_11jan18_KAZ_m4_sp1_23_rev.tif	11jan18_KAZ_m4	KAZ male	KAZ	male	Musc	M.musculus	7feb18_11jan18_KAZ_m4_sp1_23_rev.tif_Batch9
Batch9		7feb18_11jan18_KAZ_m4_sp1_22_rev.tif	464-26310-16816.tif	2	20	25	no	yes	0	0	7feb18_11jan18_KAZ_m4_sp1_22_rev.tif	11jan18_KAZ_m4	KAZ male	KAZ	male	Musc	M.musculus	7feb18_11jan18_KAZ_m4_sp1_22_rev.tif_Batch9
Batch9		16mar18_11jan18_KAZ_m1_sp1_8_rev.tif	6591-27652-31427.tif	2	20	22	no	yes	0	0	16mar18_11jan18_KAZ_m1_sp1_8_rev.tif	11jan18_KAZ_m1	KAZ male	KAZ	male	Musc	M.musculus	16mar18_11jan18_KAZ_m1_sp1_8_rev.tif_Batch9
Batch9		7feb18_11jan18_KAZ_m4_sp1_4_rev.tif	7747-14218-13055.tif	2	20	32	no	yes	0	0	7feb18_11jan18_KAZ_m4_sp1_4_rev.tif	11jan18_KAZ_m4	KAZ male	KAZ	male	Musc	M.musculus	7feb18_11jan18_KAZ_m4_sp1_4_rev.tif_Batch9
Batch9		26jan18_11jan18_KAZ_m3_sp1_16_rev.tif	7995-24758-145.tif	2	20	21	no	yes	0	0	26jan18_11jan18_KAZ_m3_sp1_16_rev.tif	11jan18_KAZ_m3	KAZ male	KAZ	male	Musc	M.musculus	26jan18_11jan18_KAZ_m3_sp1_16_rev.tif_Batch9
Batch11		3jul18_19may18_KAZ_m1_sp1_26.3_rev.tif	2274-16145-24735.tif	2	20	18	no	yes	1	0	3jul18_19may18_KAZ_m1_sp1_26.3_rev.tif	19may18_KAZ_m1	KAZ male	KAZ	male	Musc	M.musculus	3jul18_19may18_KAZ_m1_sp1_26.3_rev.tif_Batch11
Batch11		3jul18_19may18_KAZ_m1_sp1_20_rev.tif	6521-9728-11371.tif	2	20	20	no	yes	0	0	3jul18_19may18_KAZ_m1_sp1_20_rev.tif	19may18_KAZ_m1	KAZ male	KAZ	male	Musc	M.musculus	3jul18_19may18_KAZ_m1_sp1_20_rev.tif_Batch11
Batch11		3jul18_19may18_KAZ_m1_sp1_12_rev.tif	12393-14530-12376.tif	2	20	20	no	yes	3	0	3jul18_19may18_KAZ_m1_sp1_12_rev.tif	19may18_KAZ_m1	KAZ male	KAZ	male	Musc	M.musculus	3jul18_19may18_KAZ_m1_sp1_12_rev.tif_Batch11
Batch11		5jun18_21may18_KAZ_m2_sp1_1_rev.tif	17746-31387-19953.tif	2	20	21	no	yes	0	0	5jun18_21may18_KAZ_m2_sp1_1_rev.tif	21may18_KAZ_m2	KAZ male	KAZ	male	Musc	M.musculus	5jun18_21may18_KAZ_m2_sp1_1_rev.tif_Batch11
Batch11		5jun18_21may18_KAZ_m2_sp1_8.1_rev.tif	32479-1597-2754.tif	2	20	21	no	yes	0	0	5jun18_21may18_KAZ_m2_sp1_8.1_rev.tif	21may18_KAZ_m2	KAZ male	KAZ	male	Musc	M.musculus	5jun18_21may18_KAZ_m2_sp1_8.1_rev.tif_Batch11
Batch11		5jun18_21may18_KAZ_m2_sp1_7_rev.tif	24865-2203-18222.tif	2	20	21	no	yes	1	0	5jun18_21may18_KAZ_m2_sp1_7_rev.tif	21may18_KAZ_m2	KAZ male	KAZ	male	Musc	M.musculus	5jun18_21may18_KAZ_m2_sp1_7_rev.tif_Batch11
Batch11		3jul18_19may18_KAZ_m1_sp1_22.2_rev.tif	26022-21894-28639.tif	2	20	22	no	yes	0	0	3jul18_19may18_KAZ_m1_sp1_22.2_rev.tif	19may18_KAZ_m1	KAZ male	KAZ	male	Musc	M.musculus	3jul18_19may18_KAZ_m1_sp1_22.2_rev.tif_Batch11
Batch11		5jun18_21may18_KAZ_m2_sp1_11_rev.tif	5109-25270-584.tif	2	20	22	no	yes	0	0	5jun18_21may18_KAZ_m2_sp1_11_rev.tif	21may18_KAZ_m2	KAZ male	KAZ	male	Musc	M.musculus	5jun18_21may18_KAZ_m2_sp1_11_rev.tif_Batch11
Batch11		3jul18_19may18_KAZ_m1_sp1_11_rev.tif	21176-31837-20898.tif	2	20	22	no	yes	0	0	3jul18_19may18_KAZ_m1_sp1_11_rev.tif	19may18_KAZ_m1	KAZ male	KAZ	male	Musc	M.musculus	3jul18_19may18_KAZ_m1_sp1_11_rev.tif_Batch11
Batch11		3jul18_19may18_KAZ_m1_sp1_15_rev.tif	819-13894-18073.tif	2	20	23	no	yes	0	0	3jul18_19may18_KAZ_m1_sp1_15_rev.tif	19may18_KAZ_m1	KAZ male	KAZ	male	Musc	M.musculus	3jul18_19may18_KAZ_m1_sp1_15_rev.tif_Batch11
Batch11		5jun18_21may18_KAZ_m2_sp1_13_rev.tif	7651-10215-3747.tif	2	20	24	no	yes	0	0	5jun18_21may18_KAZ_m2_sp1_13_rev.tif	21may18_KAZ_m2	KAZ male	KAZ	male	Musc	M.musculus	5jun18_21may18_KAZ_m2_sp1_13_rev.tif_Batch11
Batch11		3jul18_19may18_KAZ_m1_sp1_3.2_rev.tif	3-32622-25252.tif	2	20	25	no	yes	0	0	3jul18_19may18_KAZ_m1_sp1_3.2_rev.tif	19may18_KAZ_m1	KAZ male	KAZ	male	Musc	M.musculus	3jul18_19may18_KAZ_m1_sp1_3.2_rev.tif_Batch11
Batch11		5jun18_21may18_KAZ_m2_sp1_8.3_rev.tif	31625-927-7113.tif	2	20	26	no	no	0	0	5jun18_21may18_KAZ_m2_sp1_8.3_rev.tif	21may18_KAZ_m2	KAZ male	KAZ	male	Musc	M.musculus	5jun18_21may18_KAZ_m2_sp1_8.3_rev.tif_Batch11
Batch16		6aug19_10jul19_KAZ_m4_sp1_9_rev.tif	4400-21085-30587.tif	2	20	25	no	yes	0	0	6aug19_10jul19_KAZ_m4_sp1_9_rev.tif	10jul19_KAZ_m4	KAZ male	KAZ	male	Musc	M.musculus	6aug19_10jul19_KAZ_m4_sp1_9_rev.tif_Batch16
Batch16		6aug19_10jul19_KAZ_m4_sp1_7.1_rev.tif	27086-13316-23533.tif	2	20	26	no	yes	0	0	6aug19_10jul19_KAZ_m4_sp1_7.1_rev.tif	10jul19_KAZ_m4	KAZ male	KAZ	male	Musc	M.musculus	6aug19_10jul19_KAZ_m4_sp1_7.1_rev.tif_Batch16
Batch16		6aug19_10jul19_KAZ_m4_sp1_5.1_rev.tif	6466-7651-30323.tif	2	20	24	no	yes	0	0	6aug19_10jul19_KAZ_m4_sp1_5.1_rev.tif	10jul19_KAZ_m4	KAZ male	KAZ	male	Musc	M.musculus	6aug19_10jul19_KAZ_m4_sp1_5.1_rev.tif_Batch16
Batch16		6aug19_10jul19_KAZ_m4_sp1_4.2_rev.tif	21370-16803-26026.tif	2	20	27	no	yes	0	0	6aug19_10jul19_KAZ_m4_sp1_4.2_rev.tif	10jul19_KAZ_m4	KAZ male	KAZ	male	Musc	M.musculus	6aug19_10jul19_KAZ_m4_sp1_4.2_rev.tif_Batch16
Batch16		6aug19_10jul19_KAZ_m4_sp1_2.1_rev.tif	7283-8886-9659.tif	2	20	24	no	yes	0	0	6aug19_10jul19_KAZ_m4_sp1_2.1_rev.tif	10jul19_KAZ_m4	KAZ male	KAZ	male	Musc	M.musculus	6aug19_10jul19_KAZ_m4_sp1_2.1_rev.tif_Batch16
Batch16		6aug19_10jul19_KAZ_m4_sp1_16.1_rev.tif	6060-4786-16684.tif	2	20	24	no	yes	1	0	6aug19_10jul19_KAZ_m4_sp1_16.1_rev.tif	10jul19_KAZ_m4	KAZ male	KAZ	male	Musc	M.musculus	6aug19_10jul19_KAZ_m4_sp1_16.1_rev.tif_Batch16
Batch16		6aug19_10jul19_KAZ_m4_sp1_15.2_rev.tif	30479-3042-1799.tif	2	20	25	no	yes	0	0	6aug19_10jul19_KAZ_m4_sp1_15.2_rev.tif	10jul19_KAZ_m4	KAZ male	KAZ	male	Musc	M.musculus	6aug19_10jul19_KAZ_m4_sp1_15.2_rev.tif_Batch16
Batch16		6aug19_10jul19_KAZ_m4_sp1_10_rev.tif	5747-18613-8561.tif	2	20	24	no	yes	1	0	6aug19_10jul19_KAZ_m4_sp1_10_rev.tif	10jul19_KAZ_m4	KAZ male	KAZ	male	Musc	M.musculus	6aug19_10jul19_KAZ_m4_sp1_10_rev.tif_Batch16
Batch16		6aug19_10jul19_KAZ_m4_sp1_1.2_rev.tif	26212-22406-5693.tif	2	20	26	no	yes	2	0	6aug19_10jul19_KAZ_m4_sp1_1.2_rev.tif	10jul19_KAZ_m4	KAZ male	KAZ	male	Musc	M.musculus	6aug19_10jul19_KAZ_m4_sp1_1.2_rev.tif_Batch16
Batch16		6aug19_10jul19_KAZ_m3_sp1_8.1_rev.tif	11499-5900-29712.tif	2	20	32	no	yes	0	0	6aug19_10jul19_KAZ_m3_sp1_8.1_rev.tif	10jul19_KAZ_m3	KAZ male	KAZ	male	Musc	M.musculus	6aug19_10jul19_KAZ_m3_sp1_8.1_rev.tif_Batch16
Batch16		6aug19_10jul19_KAZ_m3_sp1_7_rev.tif	21059-15976-7036.tif	2	20	31	no	yes	0	0	6aug19_10jul19_KAZ_m3_sp1_7_rev.tif	10jul19_KAZ_m3	KAZ male	KAZ	male	Musc	M.musculus	6aug19_10jul19_KAZ_m3_sp1_7_rev.tif_Batch16
Batch16		6aug19_10jul19_KAZ_m3_sp1_4.2_rev.tif	11059-32607-30161.tif	2	20	23	no	yes	0	0	6aug19_10jul19_KAZ_m3_sp1_4.2_rev.tif	10jul19_KAZ_m3	KAZ male	KAZ	male	Musc	M.musculus	6aug19_10jul19_KAZ_m3_sp1_4.2_rev.tif_Batch16
Batch16		6aug19_10jul19_KAZ_m3_sp1_3_rev.tif	3313-19382-5048.tif	2	20	34	no	yes	0	0	6aug19_10jul19_KAZ_m3_sp1_3_rev.tif	10jul19_KAZ_m3	KAZ male	KAZ	male	Musc	M.musculus	6aug19_10jul19_KAZ_m3_sp1_3_rev.tif_Batch16
Batch16		6aug19_10jul19_KAZ_m3_sp1_12_rev.tif	13448-19870-13470.tif	2	20	28	no	yes	0	0	6aug19_10jul19_KAZ_m3_sp1_12_rev.tif	10jul19_KAZ_m3	KAZ male	KAZ	male	Musc	M.musculus	6aug19_10jul19_KAZ_m3_sp1_12_rev.tif_Batch16
Batch16		6aug19_10jul19_KAZ_m2_sp1_5.1_rev.tif	2870-29778-4362.tif	2	20	30	no	yes	1	0	6aug19_10jul19_KAZ_m2_sp1_5.1_rev.tif	10jul19_KAZ_m2	KAZ male	KAZ	male	Musc	M.musculus	6aug19_10jul19_KAZ_m2_sp1_5.1_rev.tif_Batch16
Batch16		6aug19_10jul19_KAZ_m2_sp1_4.3_rev.tif	1850-30923-13499.tif	2	20	24	no	yes	0	0	6aug19_10jul19_KAZ_m2_sp1_4.3_rev.tif	10jul19_KAZ_m2	KAZ male	KAZ	male	Musc	M.musculus	6aug19_10jul19_KAZ_m2_sp1_4.3_rev.tif_Batch16
Batch16		6aug19_10jul19_KAZ_m2_sp1_2.2_rev.tif	771-6111-3214.tif	2	20	27	no	no	0	0	6aug19_10jul19_KAZ_m2_sp1_2.2_rev.tif	10jul19_KAZ_m2	KAZ male	KAZ	male	Musc	M.musculus	6aug19_10jul19_KAZ_m2_sp1_2.2_rev.tif_Batch16
Batch16		6aug19_10jul19_KAZ_m2_sp1_13_rev.tif	15629-32610-727.tif	2	20	29	no	yes	0	0	6aug19_10jul19_KAZ_m2_sp1_13_rev.tif	10jul19_KAZ_m2	KAZ male	KAZ	male	Musc	M.musculus	6aug19_10jul19_KAZ_m2_sp1_13_rev.tif_Batch16
Batch16		6aug19_10jul19_KAZ_m2_sp1_12.2_rev.tif	26626-19502-12067.tif	2	20	27	no	yes	0	0	6aug19_10jul19_KAZ_m2_sp1_12.2_rev.tif	10jul19_KAZ_m2	KAZ male	KAZ	male	Musc	M.musculus	6aug19_10jul19_KAZ_m2_sp1_12.2_rev.tif_Batch16
Batch16		6aug19_10jul19_KAZ_m1_sp1_8.1_rev.tif	6631-28803-17242.tif	2	20	26	no	yes	0	0	6aug19_10jul19_KAZ_m1_sp1_8.1_rev.tif	10jul19_KAZ_m1	KAZ male	KAZ	male	Musc	M.musculus	6aug19_10jul19_KAZ_m1_sp1_8.1_rev.tif_Batch16
Batch16		6aug19_10jul19_KAZ_m1_sp1_7.1_rev.tif	13265-19055-16261.tif	2	20	25	no	yes	1	0	6aug19_10jul19_KAZ_m1_sp1_7.1_rev.tif	10jul19_KAZ_m1	KAZ male	KAZ	male	Musc	M.musculus	6aug19_10jul19_KAZ_m1_sp1_7.1_rev.tif_Batch16
Batch16		6aug19_10jul19_KAZ_m1_sp1_2_rev.tif	24407-26365-27930.tif	2	20	28	no	no	1	0	6aug19_10jul19_KAZ_m1_sp1_2_rev.tif	10jul19_KAZ_m1	KAZ male	KAZ	male	Musc	M.musculus	6aug19_10jul19_KAZ_m1_sp1_2_rev.tif_Batch16
batch10		20mar17_13jan17_LEW_f2_sp1_27_rev.tif	7414-26739-23214.tif	2	20	20	no		1	3	20mar17_13jan17_LEW_f2_sp1_27_rev.tif	13jan17_LEW_f2	LEW female	LEW	female	Dom	M.musculus	20mar17_13jan17_LEW_f2_sp1_27_rev.tif_batch10
batch10		12jan17_4jan17_LEW_f1_sp1_29_rev.tif	10026-29793-7684.tif	2	20	22	no		1	2	12jan17_4jan17_LEW_f1_sp1_29_rev.tif	4jan17_LEW_f1	LEW female	LEW	female	Dom	M.musculus	12jan17_4jan17_LEW_f1_sp1_29_rev.tif_batch10
batch10		12jan17_4jan17_LEW_f1_sp1_7.2_rev.tif	20819-23541-25247.tif	2	20	25	no		0	2	12jan17_4jan17_LEW_f1_sp1_7.2_rev.tif	4jan17_LEW_f1	LEW female	LEW	female	Dom	M.musculus	12jan17_4jan17_LEW_f1_sp1_7.2_rev.tif_batch10
batch10		8feb17_4jan17_LEW_f1_sp1_2_rev.tif	28124-20451-4971.tif	2	20	25	no		0	3	8feb17_4jan17_LEW_f1_sp1_2_rev.tif	4jan17_LEW_f1	LEW female	LEW	female	Dom	M.musculus	8feb17_4jan17_LEW_f1_sp1_2_rev.tif_batch10
batch10		20mar17_13jan17_LEW_f2_sp1_12_rev.tif	22955-31354-23611.tif	2	20	26	no		0	0	20mar17_13jan17_LEW_f2_sp1_12_rev.tif	13jan17_LEW_f2	LEW female	LEW	female	Dom	M.musculus	20mar17_13jan17_LEW_f2_sp1_12_rev.tif_batch10
batch10		15mar17_13jan17_LEW_f3_sp1_25_rev.tif	23648-9690-2908.tif	2	20	26	no		1	0	15mar17_13jan17_LEW_f3_sp1_25_rev.tif	13jan17_LEW_f3	LEW female	LEW	female	Dom	M.musculus	15mar17_13jan17_LEW_f3_sp1_25_rev.tif_batch10
batch10		12jan17_4jan17_LEW_f1_sp1_10_rev.tif	13677-14910-26781.tif	2	20	28	no		1	0	12jan17_4jan17_LEW_f1_sp1_10_rev.tif	4jan17_LEW_f1	LEW female	LEW	female	Dom	M.musculus	12jan17_4jan17_LEW_f1_sp1_10_rev.tif_batch10
batch10		12jan17_4jan17_LEW_f1_sp1_28_rev.tif	328-13976-11676.tif	2	20	30	no		0	0	12jan17_4jan17_LEW_f1_sp1_28_rev.tif	4jan17_LEW_f1	LEW female	LEW	female	Dom	M.musculus	12jan17_4jan17_LEW_f1_sp1_28_rev.tif_batch10
batch10		20mar17_13jan17_LEW_f2_sp1_26_rev.tif	9973-14332-29294.tif	2	20	31	no		0	0	20mar17_13jan17_LEW_f2_sp1_26_rev.tif	13jan17_LEW_f2	LEW female	LEW	female	Dom	M.musculus	20mar17_13jan17_LEW_f2_sp1_26_rev.tif_batch10
batch10		20mar17_13jan17_LEW_f2_sp1_24_rev.tif	6059-312-22853.tif	2	20	32	no		0	0	20mar17_13jan17_LEW_f2_sp1_24_rev.tif	13jan17_LEW_f2	LEW female	LEW	female	Dom	M.musculus	20mar17_13jan17_LEW_f2_sp1_24_rev.tif_batch10
batch10		12jan17_4jan17_LEW_f1_sp1_22_rev.tif	30607-14498-25542.tif	2	20	33	no		0	0	12jan17_4jan17_LEW_f1_sp1_22_rev.tif	4jan17_LEW_f1	LEW female	LEW	female	Dom	M.musculus	12jan17_4jan17_LEW_f1_sp1_22_rev.tif_batch10
batch10		20mar17_13jan17_LEW_f2_sp1_20_rev.tif	21802-26184-7742.tif	2	20	36	no		0	0	20mar17_13jan17_LEW_f2_sp1_20_rev.tif	13jan17_LEW_f2	LEW female	LEW	female	Dom	M.musculus	20mar17_13jan17_LEW_f2_sp1_20_rev.tif_batch10
batch10		20mar17_13jan17_LEW_f2_sp1_7.2_rev.tif	28304-5945-3172.tif	2	20	37	no		0	0	20mar17_13jan17_LEW_f2_sp1_7.2_rev.tif	13jan17_LEW_f2	LEW female	LEW	female	Dom	M.musculus	20mar17_13jan17_LEW_f2_sp1_7.2_rev.tif_batch10
batch10		20mar17_13jan17_LEW_f2_sp1_25_rev.tif	25332-24724-26398.tif	2	20	38	no		0	1	20mar17_13jan17_LEW_f2_sp1_25_rev.tif	13jan17_LEW_f2	LEW female	LEW	female	Dom	M.musculus	20mar17_13jan17_LEW_f2_sp1_25_rev.tif_batch10
batch12		9apr18_1feb18_LEW_f1_sp1_9_rev.tif	12984-11918-15882.tif	2	20	22	no		0	0	9apr18_1feb18_LEW_f1_sp1_9_rev.tif	1feb18_LEW_f1	LEW female	LEW	female	Dom	M.musculus	9apr18_1feb18_LEW_f1_sp1_9_rev.tif_batch12
batch12		9apr18_1feb18_LEW_f1_sp1_5_rev.tif	19784-31159-25670.tif	2	20	26	no		2	1	9apr18_1feb18_LEW_f1_sp1_5_rev.tif	1feb18_LEW_f1	LEW female	LEW	female	Dom	M.musculus	9apr18_1feb18_LEW_f1_sp1_5_rev.tif_batch12
batch12		9apr18_1feb18_LEW_f1_sp1_10_rev.tif	12278-28026-16016.tif	2	20	27	no		0	0	9apr18_1feb18_LEW_f1_sp1_10_rev.tif	1feb18_LEW_f1	LEW female	LEW	female	Dom	M.musculus	9apr18_1feb18_LEW_f1_sp1_10_rev.tif_batch12
Batch4		12jan17_4jan17_LEW_f1_sp1_11_rev.tif	26981-26605-21247.tif	2	20	29			1	0	12jan17_4jan17_LEW_f1_sp1_11_rev.tif	4jan17_LEW_f1	LEW female	LEW	female	Dom	M.musculus	12jan17_4jan17_LEW_f1_sp1_11_rev.tif_Batch4
Batch4		12jan17_4jan17_LEW_f1_sp1_24_rev.tif	6926-13033-28184.tif	2	20	37			0	1	12jan17_4jan17_LEW_f1_sp1_24_rev.tif	4jan17_LEW_f1	LEW female	LEW	female	Dom	M.musculus	12jan17_4jan17_LEW_f1_sp1_24_rev.tif_Batch4
Batch4		12jan17_4jan17_LEW_f3_sp1_3_rev.tif	18177-6367-20071.tif	2	20	23			0	0	12jan17_4jan17_LEW_f3_sp1_3_rev.tif	4jan17_LEW_f3	LEW female	LEW	female	Dom	M.musculus	12jan17_4jan17_LEW_f3_sp1_3_rev.tif_Batch4
Batch4		12jan17_4jan17_LEW_f3_sp1_9_rev.tif	3359-4814-32582.tif	2	20	21			1	0	12jan17_4jan17_LEW_f3_sp1_9_rev.tif	4jan17_LEW_f3	LEW female	LEW	female	Dom	M.musculus	12jan17_4jan17_LEW_f3_sp1_9_rev.tif_Batch4
Batch4		19jan17_4jan17_LEW_f7_sp1_19_rev.tif	8531-9927-3923.tif	2	20	26			0	2	19jan17_4jan17_LEW_f7_sp1_19_rev.tif	4jan17_LEW_f7	LEW female	LEW	female	Dom	M.musculus	19jan17_4jan17_LEW_f7_sp1_19_rev.tif_Batch4
Batch4		19jan17_4jan17_LEW_f7_sp1_22_rev.tif	16813-8852-9262.tif	2	20	31			0	0	19jan17_4jan17_LEW_f7_sp1_22_rev.tif	4jan17_LEW_f7	LEW female	LEW	female	Dom	M.musculus	19jan17_4jan17_LEW_f7_sp1_22_rev.tif_Batch4
Batch4		19jan17_4jan17_LEW_f7_sp1_26_rev.tif	879-4344-10739.tif	2	20	26			2	0	19jan17_4jan17_LEW_f7_sp1_26_rev.tif	4jan17_LEW_f7	LEW female	LEW	female	Dom	M.musculus	19jan17_4jan17_LEW_f7_sp1_26_rev.tif_Batch4
Batch4		19jan17_4jan17_LEW_f7_sp1_4_rev.tif	30454-32551-22163.tif	2	20	20			2	0	19jan17_4jan17_LEW_f7_sp1_4_rev.tif	4jan17_LEW_f7	LEW female	LEW	female	Dom	M.musculus	19jan17_4jan17_LEW_f7_sp1_4_rev.tif_Batch4
Batch4		19jan17_4jan17_LEW_f7_sp1_7_rev.tif	17367-14469-32427.tif	2	20	23			2	0	19jan17_4jan17_LEW_f7_sp1_7_rev.tif	4jan17_LEW_f7	LEW female	LEW	female	Dom	M.musculus	19jan17_4jan17_LEW_f7_sp1_7_rev.tif_Batch4
Batch5		30jun17_4jan17_LEW_f3_sp1_4_rev.tif	28157-25744-2034.tif	2	20	23	no		0	0	30jun17_4jan17_LEW_f3_sp1_4_rev.tif	4jan17_LEW_f3	LEW female	LEW	female	Dom	M.musculus	30jun17_4jan17_LEW_f3_sp1_4_rev.tif_Batch5
Batch5		30jun17_4jan17_LEW_f3_sp1_10_rev.tif	8204-31150-11666.tif	2	20	33	no		0	0	30jun17_4jan17_LEW_f3_sp1_10_rev.tif	4jan17_LEW_f3	LEW female	LEW	female	Dom	M.musculus	30jun17_4jan17_LEW_f3_sp1_10_rev.tif_Batch5
Batch5		30jun17_4jan17_LEW_f3_sp1_2_rev.tif	17933-7819-543.tif	2	20	30	no		1	0	30jun17_4jan17_LEW_f3_sp1_2_rev.tif	4jan17_LEW_f3	LEW female	LEW	female	Dom	M.musculus	30jun17_4jan17_LEW_f3_sp1_2_rev.tif_Batch5
Batch5		30jun17_4jan17_LEW_f3_sp1_12_rev.tif	12078-9124-12546.tif	2	20	33	no		1	0	30jun17_4jan17_LEW_f3_sp1_12_rev.tif	4jan17_LEW_f3	LEW female	LEW	female	Dom	M.musculus	30jun17_4jan17_LEW_f3_sp1_12_rev.tif_Batch5
Batch5		30jun17_4jan17_LEW_f3_sp1_8_rev.tif	17541-31226-29291.tif	2	20	24	no		2	0	30jun17_4jan17_LEW_f3_sp1_8_rev.tif	4jan17_LEW_f3	LEW female	LEW	female	Dom	M.musculus	30jun17_4jan17_LEW_f3_sp1_8_rev.tif_Batch5
batch8		5aug17_14jul17_LEW_f1_sp1_9_rev.tif	21017-15047-2987.tif	2	20	24	no		0	0	5aug17_14jul17_LEW_f1_sp1_9_rev.tif	14jul17_LEW_f1	LEW female	LEW	female	Dom	M.musculus	5aug17_14jul17_LEW_f1_sp1_9_rev.tif_batch8
batch8		5aug17_14jul17_LEW_f1_sp1_14_rev.tif	5136-20033-246.tif	2	20	33	no		0	0	5aug17_14jul17_LEW_f1_sp1_14_rev.tif	14jul17_LEW_f1	LEW female	LEW	female	Dom	M.musculus	5aug17_14jul17_LEW_f1_sp1_14_rev.tif_batch8
batch8		5aug17_14jul17_LEW_f1_sp1_6_rev.tif	15000-30114-7347.tif	2	20	24	no		1	0	5aug17_14jul17_LEW_f1_sp1_6_rev.tif	14jul17_LEW_f1	LEW female	LEW	female	Dom	M.musculus	5aug17_14jul17_LEW_f1_sp1_6_rev.tif_batch8
batch8		5aug17_14jul17_LEW_f1_sp1_11_rev.tif	9862-26584-14552.tif	2	20	33	no		2	1	5aug17_14jul17_LEW_f1_sp1_11_rev.tif	14jul17_LEW_f1	LEW female	LEW	female	Dom	M.musculus	5aug17_14jul17_LEW_f1_sp1_11_rev.tif_batch8
Batch3		30nov16_13nov16_LEW_m1_sp1_18_rev.tif	18744-27907-31039.tif	2	20	25	yes	yes	0	0	30nov16_13nov16_LEW_m1_sp1_18_rev.tif	13nov16_LEW_m1	LEW male	LEW	male	Dom	M.musculus	30nov16_13nov16_LEW_m1_sp1_18_rev.tif_Batch3
Batch3		30nov16_13nov16_LEW_m1_sp1_19.1_rev.tif	27363-7007-24669.tif	2	20	27		y	0	0	30nov16_13nov16_LEW_m1_sp1_19.1_rev.tif	13nov16_LEW_m1	LEW male	LEW	male	Dom	M.musculus	30nov16_13nov16_LEW_m1_sp1_19.1_rev.tif_Batch3
Batch3		30nov16_13nov16_LEW_m1_sp1_22.2_rev.tif	959-2160-27312.tif	2	20	23		y	1	0	30nov16_13nov16_LEW_m1_sp1_22.2_rev.tif	13nov16_LEW_m1	LEW male	LEW	male	Dom	M.musculus	30nov16_13nov16_LEW_m1_sp1_22.2_rev.tif_Batch3
Batch3		30nov16_13nov16_LEW_m1_sp1_25.1_rev.tif	9066-30259-28617.tif	2	20	19			2	0	30nov16_13nov16_LEW_m1_sp1_25.1_rev.tif	13nov16_LEW_m1	LEW male	LEW	male	Dom	M.musculus	30nov16_13nov16_LEW_m1_sp1_25.1_rev.tif_Batch3
Batch3		30nov16_13nov16_LEW_m1_sp1_4_rev.tif	26556-25769-12712.tif	2	20	26		yes	0	0	30nov16_13nov16_LEW_m1_sp1_4_rev.tif	13nov16_LEW_m1	LEW male	LEW	male	Dom	M.musculus	30nov16_13nov16_LEW_m1_sp1_4_rev.tif_Batch3
Batch3		4feb17_20dec16_LEW_m3_sp1_13_rev.tif	1400-24045-11934.tif	2	20	20		yes	0	0	4feb17_20dec16_LEW_m3_sp1_13_rev.tif	20dec16_LEW_m3	LEW male	LEW	male	Dom	M.musculus	4feb17_20dec16_LEW_m3_sp1_13_rev.tif_Batch3
Batch3		4feb17_4jan17_LEW_m1_sp1_12_rev.tif	7367-13912-21512.tif	2	20	26		y	0	0	4feb17_4jan17_LEW_m1_sp1_12_rev.tif	4jan17_LEW_m1	LEW male	LEW	male	Dom	M.musculus	4feb17_4jan17_LEW_m1_sp1_12_rev.tif_Batch3
Batch3		4feb17_4jan17_LEW_m1_sp1_13_rev.tif	28094-29308-12301.tif	2	20	25	no	no	0	0	4feb17_4jan17_LEW_m1_sp1_13_rev.tif	4jan17_LEW_m1	LEW male	LEW	male	Dom	M.musculus	4feb17_4jan17_LEW_m1_sp1_13_rev.tif_Batch3
Batch3		4feb17_4jan17_LEW_m1_sp1_18_rev.tif	7585-19477-434.tif	2	20	27	n	yes	1	0	4feb17_4jan17_LEW_m1_sp1_18_rev.tif	4jan17_LEW_m1	LEW male	LEW	male	Dom	M.musculus	4feb17_4jan17_LEW_m1_sp1_18_rev.tif_Batch3
Batch3		4feb17_4jan17_LEW_m1_sp1_23_rev.tif	7484-9712-12687.tif	2	20	30		yes	0	0	4feb17_4jan17_LEW_m1_sp1_23_rev.tif	4jan17_LEW_m1	LEW male	LEW	male	Dom	M.musculus	4feb17_4jan17_LEW_m1_sp1_23_rev.tif_Batch3
Batch3		4feb17_4jan17_LEW_m1_sp1_25_rev.tif	4784-17349-20942.tif	2	20	24		y	1	0	4feb17_4jan17_LEW_m1_sp1_25_rev.tif	4jan17_LEW_m1	LEW male	LEW	male	Dom	M.musculus	4feb17_4jan17_LEW_m1_sp1_25_rev.tif_Batch3
Batch3		4feb17_4jan17_LEW_m1_sp1_32_rev.tif	3355-16840-11528.tif	2	20	24	n	y	0	0	4feb17_4jan17_LEW_m1_sp1_32_rev.tif	4jan17_LEW_m1	LEW male	LEW	male	Dom	M.musculus	4feb17_4jan17_LEW_m1_sp1_32_rev.tif_Batch3
Batch3		7feb17_20dec16_LEW_m2_sp1_1_rev.tif	11795-27792-13981.tif	2	20	24		y	1	0	7feb17_20dec16_LEW_m2_sp1_1_rev.tif	20dec16_LEW_m2	LEW male	LEW	male	Dom	M.musculus	7feb17_20dec16_LEW_m2_sp1_1_rev.tif_Batch3
Batch3		7feb17_20dec16_LEW_m2_sp1_13.1_rev.tif	23247-29883-12677.tif	2	20	28		y	1	0	7feb17_20dec16_LEW_m2_sp1_13.1_rev.tif	20dec16_LEW_m2	LEW male	LEW	male	Dom	M.musculus	7feb17_20dec16_LEW_m2_sp1_13.1_rev.tif_Batch3
Batch3		7feb17_20dec16_LEW_m2_sp1_15_rev.tif	18716-6584-18842.tif	2	20	27		y	0	0	7feb17_20dec16_LEW_m2_sp1_15_rev.tif	20dec16_LEW_m2	LEW male	LEW	male	Dom	M.musculus	7feb17_20dec16_LEW_m2_sp1_15_rev.tif_Batch3
Batch3		7feb17_20dec16_LEW_m2_sp1_22_rev.tif	25993-30681-16882.tif	2	20	23		y	1	0	7feb17_20dec16_LEW_m2_sp1_22_rev.tif	20dec16_LEW_m2	LEW male	LEW	male	Dom	M.musculus	7feb17_20dec16_LEW_m2_sp1_22_rev.tif_Batch3
Batch3		7feb17_20dec16_LEW_m2_sp1_3.1_rev.tif	16007-22017-18382.tif	2	20	23		y	0	0	7feb17_20dec16_LEW_m2_sp1_3.1_rev.tif	20dec16_LEW_m2	LEW male	LEW	male	Dom	M.musculus	7feb17_20dec16_LEW_m2_sp1_3.1_rev.tif_Batch3
Batch3		7feb17_20dec16_LEW_m2_sp1_9_rev.tif	8011-21666-23132.tif	2	20	26		yes	0	0	7feb17_20dec16_LEW_m2_sp1_9_rev.tif	20dec16_LEW_m2	LEW male	LEW	male	Dom	M.musculus	7feb17_20dec16_LEW_m2_sp1_9_rev.tif_Batch3
Batch6		2jul17_20dec16_LEW_m3_sp1_2_rev.tif	15813-20540-6700.tif	2	20	21	no		0	0	2jul17_20dec16_LEW_m3_sp1_2_rev.tif	20dec16_LEW_m3	LEW male	LEW	male	Dom	M.musculus	2jul17_20dec16_LEW_m3_sp1_2_rev.tif_Batch6
Batch6		3aug17_8may17_LEW_m2_sp1_9_rev.tif	18935-10387-14331.tif	2	20	21	no		1	0	3aug17_8may17_LEW_m2_sp1_9_rev.tif	8may17_LEW_m2	LEW male	LEW	male	Dom	M.musculus	3aug17_8may17_LEW_m2_sp1_9_rev.tif_Batch6
Batch6		2jul17_20dec16_LEW_m3_sp1_9_rev.tif	30827-21580-21151.tif	2	20	21	no		0	0	2jul17_20dec16_LEW_m3_sp1_9_rev.tif	20dec16_LEW_m3	LEW male	LEW	male	Dom	M.musculus	2jul17_20dec16_LEW_m3_sp1_9_rev.tif_Batch6
Batch6		3aug17_8may17_LEW_m2_sp1_12.1_rev.tif	13739-23010-24379.tif	2	20	23	no		0	0	3aug17_8may17_LEW_m2_sp1_12.1_rev.tif	8may17_LEW_m2	LEW male	LEW	male	Dom	M.musculus	3aug17_8may17_LEW_m2_sp1_12.1_rev.tif_Batch6
Batch6		8feb17_20dec16_LEW_m1_sp1_8_rev.tif	13965-7415-12826.tif	2	20	23	no		0	0	8feb17_20dec16_LEW_m1_sp1_8_rev.tif	20dec16_LEW_m1	LEW male	LEW	male	Dom	M.musculus	8feb17_20dec16_LEW_m1_sp1_8_rev.tif_Batch6
Batch6		3aug17_8may17_LEW_m2_sp1_13_rev.tif	26980-27578-29685.tif	2	20	23	no		0	0	3aug17_8may17_LEW_m2_sp1_13_rev.tif	8may17_LEW_m2	LEW male	LEW	male	Dom	M.musculus	3aug17_8may17_LEW_m2_sp1_13_rev.tif_Batch6
Batch6		2jul17_20dec16_LEW_m2_sp1_7_rev.tif	4237-9567-13390.tif	2	20	23	no		0	0	2jul17_20dec16_LEW_m2_sp1_7_rev.tif	20dec16_LEW_m2	LEW male	LEW	male	Dom	M.musculus	2jul17_20dec16_LEW_m2_sp1_7_rev.tif_Batch6
Batch6		3aug17_8may17_LEW_m2_sp1_5_rev.tif	4378-4841-11406.tif	2	20	23	no		1	0	3aug17_8may17_LEW_m2_sp1_5_rev.tif	8may17_LEW_m2	LEW male	LEW	male	Dom	M.musculus	3aug17_8may17_LEW_m2_sp1_5_rev.tif_Batch6
Batch6		2jul17_20dec16_LEW_m2_sp1_16_rev.tif	4678-25099-321.tif	2	20	23	no		0	0	2jul17_20dec16_LEW_m2_sp1_16_rev.tif	20dec16_LEW_m2	LEW male	LEW	male	Dom	M.musculus	2jul17_20dec16_LEW_m2_sp1_16_rev.tif_Batch6
Batch6		2jul17_20dec16_LEW_m2_sp1_9.2_rev.tif	4749-9438-5551.tif	2	20	23	no		0	0	2jul17_20dec16_LEW_m2_sp1_9.2_rev.tif	20dec16_LEW_m2	LEW male	LEW	male	Dom	M.musculus	2jul17_20dec16_LEW_m2_sp1_9.2_rev.tif_Batch6
Batch6		3aug17_8may17_LEW_m2_sp1_36_rev.tif	17160-4363-3193.tif	2	20	25	no		0	0	3aug17_8may17_LEW_m2_sp1_36_rev.tif	8may17_LEW_m2	LEW male	LEW	male	Dom	M.musculus	3aug17_8may17_LEW_m2_sp1_36_rev.tif_Batch6
Batch6		2jul17_20dec16_LEW_m3_sp1_10_rev.tif	18207-12185-32139.tif	2	20	25	no		1	0	2jul17_20dec16_LEW_m3_sp1_10_rev.tif	20dec16_LEW_m3	LEW male	LEW	male	Dom	M.musculus	2jul17_20dec16_LEW_m3_sp1_10_rev.tif_Batch6
Batch6		9may17_4jan17_LEW_m1_sp1_13_rev.tif	31078-24000-17173.tif	2	20	25	no		0	0	9may17_4jan17_LEW_m1_sp1_13_rev.tif	4jan17_LEW_m1	LEW male	LEW	male	Dom	M.musculus	9may17_4jan17_LEW_m1_sp1_13_rev.tif_Batch6
Batch6		3aug17_8may17_LEW_m2_sp1_18_rev.tif	4222-20143-25028.tif	2	20	25	no		1	0	3aug17_8may17_LEW_m2_sp1_18_rev.tif	8may17_LEW_m2	LEW male	LEW	male	Dom	M.musculus	3aug17_8may17_LEW_m2_sp1_18_rev.tif_Batch6
Batch6		9may17_4jan17_LEW_m1_sp1_12_rev.tif	7529-18150-29826.tif	2	20	25	yes		0	0	9may17_4jan17_LEW_m1_sp1_12_rev.tif	4jan17_LEW_m1	LEW male	LEW	male	Dom	M.musculus	9may17_4jan17_LEW_m1_sp1_12_rev.tif_Batch6
Batch6		3aug17_8may17_LEW_m2_sp1_11.1_rev.tif	22305-19763-32071.tif	2	20	26	no		1	0	3aug17_8may17_LEW_m2_sp1_11.1_rev.tif	8may17_LEW_m2	LEW male	LEW	male	Dom	M.musculus	3aug17_8may17_LEW_m2_sp1_11.1_rev.tif_Batch6
Batch6		8feb17_20dec16_LEW_m1_sp1_28_rev.tif	9676-9557-7027.tif	2	20	26	no		1	0	8feb17_20dec16_LEW_m1_sp1_28_rev.tif	20dec16_LEW_m1	LEW male	LEW	male	Dom	M.musculus	8feb17_20dec16_LEW_m1_sp1_28_rev.tif_Batch6
Batch6		9may17_4jan17_LEW_m1_sp1_10_rev.tif	18187-9955-15233.tif	2	20	27	no		1	0	9may17_4jan17_LEW_m1_sp1_10_rev.tif	4jan17_LEW_m1	LEW male	LEW	male	Dom	M.musculus	9may17_4jan17_LEW_m1_sp1_10_rev.tif_Batch6
Batch6		8feb17_20dec16_LEW_m1_sp1_32.1_rev.tif	19713-16735-18293.tif	2	20	27	no		0	0	8feb17_20dec16_LEW_m1_sp1_32.1_rev.tif	20dec16_LEW_m1	LEW male	LEW	male	Dom	M.musculus	8feb17_20dec16_LEW_m1_sp1_32.1_rev.tif_Batch6
Batch6		2jul17_20dec16_LEW_m3_sp1_7_rev.tif	21077-11051-4170.tif	2	20	27	no		0	0	2jul17_20dec16_LEW_m3_sp1_7_rev.tif	20dec16_LEW_m3	LEW male	LEW	male	Dom	M.musculus	2jul17_20dec16_LEW_m3_sp1_7_rev.tif_Batch6
Batch6		2jul17_20dec16_LEW_m2_sp1_13_rev.tif	26466-26477-24471.tif	2	20	27	no		1	0	2jul17_20dec16_LEW_m2_sp1_13_rev.tif	20dec16_LEW_m2	LEW male	LEW	male	Dom	M.musculus	2jul17_20dec16_LEW_m2_sp1_13_rev.tif_Batch6
Batch6		2jul17_20dec16_LEW_m2_sp1_18_rev.tif	22143-25298-27559.tif	2	20	28	no		1	0	2jul17_20dec16_LEW_m2_sp1_18_rev.tif	20dec16_LEW_m2	LEW male	LEW	male	Dom	M.musculus	2jul17_20dec16_LEW_m2_sp1_18_rev.tif_Batch6
Batch6		3aug17_8may17_LEW_m2_sp1_6_rev.tif	2328-8954-769.tif	2	20	28	no		1	0	3aug17_8may17_LEW_m2_sp1_6_rev.tif	8may17_LEW_m2	LEW male	LEW	male	Dom	M.musculus	3aug17_8may17_LEW_m2_sp1_6_rev.tif_Batch6
Batch6		2jul17_20dec16_LEW_m3_sp1_8_rev.tif	5949-4063-11318.tif	2	20	28	no		0	0	2jul17_20dec16_LEW_m3_sp1_8_rev.tif	20dec16_LEW_m3	LEW male	LEW	male	Dom	M.musculus	2jul17_20dec16_LEW_m3_sp1_8_rev.tif_Batch6
Batch6		2jul17_20dec16_LEW_m2_sp1_11.1_rev.tif	12158-17485-26366.tif	2	20	28	yes		0	0	2jul17_20dec16_LEW_m2_sp1_11.1_rev.tif	20dec16_LEW_m2	LEW male	LEW	male	Dom	M.musculus	2jul17_20dec16_LEW_m2_sp1_11.1_rev.tif_Batch6
Batch6		8feb17_20dec16_LEW_m1_sp1_29_rev.tif	17117-14210-16472.tif	2	20	29	no		0	0	8feb17_20dec16_LEW_m1_sp1_29_rev.tif	20dec16_LEW_m1	LEW male	LEW	male	Dom	M.musculus	8feb17_20dec16_LEW_m1_sp1_29_rev.tif_Batch6
Batch6		9may17_4jan17_LEW_m1_sp1_5_rev.tif	1860-2372-12650.tif	2	20	29	no		0	0	9may17_4jan17_LEW_m1_sp1_5_rev.tif	4jan17_LEW_m1	LEW male	LEW	male	Dom	M.musculus	9may17_4jan17_LEW_m1_sp1_5_rev.tif_Batch6
Batch6		8feb17_20dec16_LEW_m1_sp1_32.2_rev.tif	7960-24620-29667.tif	2	20	29	no		0	0	8feb17_20dec16_LEW_m1_sp1_32.2_rev.tif	20dec16_LEW_m1	LEW male	LEW	male	Dom	M.musculus	8feb17_20dec16_LEW_m1_sp1_32.2_rev.tif_Batch6
Batch6		8feb17_20dec16_LEW_m1_sp1_7_rev.tif	8146-23511-1049.tif	2	20	29	no		0	0	8feb17_20dec16_LEW_m1_sp1_7_rev.tif	20dec16_LEW_m1	LEW male	LEW	male	Dom	M.musculus	8feb17_20dec16_LEW_m1_sp1_7_rev.tif_Batch6
Batch6		9may17_4jan17_LEW_m1_sp1_2_rev.tif	18396-32527-8292.tif	2	20	30	no		0	0	9may17_4jan17_LEW_m1_sp1_2_rev.tif	4jan17_LEW_m1	LEW male	LEW	male	Dom	M.musculus	9may17_4jan17_LEW_m1_sp1_2_rev.tif_Batch6
Batch6		2jul17_20dec16_LEW_m2_sp1_12_rev.tif	20735-31857-24240.tif	2	20	32	no		0	0	2jul17_20dec16_LEW_m2_sp1_12_rev.tif	20dec16_LEW_m2	LEW male	LEW	male	Dom	M.musculus	2jul17_20dec16_LEW_m2_sp1_12_rev.tif_Batch6
Batch9		5jul17_8may17_LEW_m1_sp1_24_rev.tif	10757-5700-16309.tif	2	20	21	no	yes	2	0	5jul17_8may17_LEW_m1_sp1_24_rev.tif	8may17_LEW_m1	LEW male	LEW	male	Dom	M.musculus	5jul17_8may17_LEW_m1_sp1_24_rev.tif_Batch9
Batch9		5jul17_8may17_LEW_m1_sp1_16_rev.tif	1578-28124-10677.tif	2	20	26	no	yes	0	0	5jul17_8may17_LEW_m1_sp1_16_rev.tif	8may17_LEW_m1	LEW male	LEW	male	Dom	M.musculus	5jul17_8may17_LEW_m1_sp1_16_rev.tif_Batch9
Batch9		6mar18_1feb18_LEW_m1_sp1_14.4_rev.tif	19631-23640-14446.tif	2	20	22	no	yes	1	0	6mar18_1feb18_LEW_m1_sp1_14.4_rev.tif	1feb18_LEW_m1	LEW male	LEW	male	Dom	M.musculus	6mar18_1feb18_LEW_m1_sp1_14.4_rev.tif_Batch9
Batch9		6mar18_1feb18_LEW_m1_sp1_8.1_rev.tif	20138-30398-25293.tif	2	20	22	no	yes	1	0	6mar18_1feb18_LEW_m1_sp1_8.1_rev.tif	1feb18_LEW_m1	LEW male	LEW	male	Dom	M.musculus	6mar18_1feb18_LEW_m1_sp1_8.1_rev.tif_Batch9
Batch9		6mar18_1feb18_LEW_m1_sp1_8.2_rev.tif	23340-16409-23593.tif	2	20	26	no	yes	0	0	6mar18_1feb18_LEW_m1_sp1_8.2_rev.tif	1feb18_LEW_m1	LEW male	LEW	male	Dom	M.musculus	6mar18_1feb18_LEW_m1_sp1_8.2_rev.tif_Batch9
Batch9		5jul17_8may17_LEW_m1_sp1_28_rev.tif	24516-747-20594.tif	2	20	24	no	yes	0	0	5jul17_8may17_LEW_m1_sp1_28_rev.tif	8may17_LEW_m1	LEW male	LEW	male	Dom	M.musculus	5jul17_8may17_LEW_m1_sp1_28_rev.tif_Batch9
Batch9		5jul17_8may17_LEW_m1_sp1_20_rev.tif	24820-4094-25921.tif	2	20	21	no	yes	0	0	5jul17_8may17_LEW_m1_sp1_20_rev.tif	8may17_LEW_m1	LEW male	LEW	male	Dom	M.musculus	5jul17_8may17_LEW_m1_sp1_20_rev.tif_Batch9
Batch9		6mar18_1feb18_LEW_m1_sp1_21.4_rev.tif	25341-12864-672.tif	2	20	23	no	yes	0	0	6mar18_1feb18_LEW_m1_sp1_21.4_rev.tif	1feb18_LEW_m1	LEW male	LEW	male	Dom	M.musculus	6mar18_1feb18_LEW_m1_sp1_21.4_rev.tif_Batch9
Batch9		6mar18_1feb18_LEW_m1_sp1_18_rev.tif	26023-9031-8269.tif	2	20	20	yes	yes	2	0	6mar18_1feb18_LEW_m1_sp1_18_rev.tif	1feb18_LEW_m1	LEW male	LEW	male	Dom	M.musculus	6mar18_1feb18_LEW_m1_sp1_18_rev.tif_Batch9
Batch9		5jul17_8may17_LEW_m1_sp1_21_rev.tif	28033-28436-17427.tif	2	20	26	no	yes	0	0	5jul17_8may17_LEW_m1_sp1_21_rev.tif	8may17_LEW_m1	LEW male	LEW	male	Dom	M.musculus	5jul17_8may17_LEW_m1_sp1_21_rev.tif_Batch9
Batch9		5jul17_8may17_LEW_m1_sp1_17_rev.tif	29258-25951-8723.tif	2	20	23	no	yes	0	0	5jul17_8may17_LEW_m1_sp1_17_rev.tif	8may17_LEW_m1	LEW male	LEW	male	Dom	M.musculus	5jul17_8may17_LEW_m1_sp1_17_rev.tif_Batch9
Batch9		6mar18_1feb18_LEW_m1_sp1_14.2_rev.tif	31444-4189-25896.tif	2	20	21	no	yes	1	0	6mar18_1feb18_LEW_m1_sp1_14.2_rev.tif	1feb18_LEW_m1	LEW male	LEW	male	Dom	M.musculus	6mar18_1feb18_LEW_m1_sp1_14.2_rev.tif_Batch9
Batch9		6mar18_1feb18_LEW_m1_sp1_1_rev.tif	4729-8045-12447.tif	2	20	23	no	yes	0	1	6mar18_1feb18_LEW_m1_sp1_1_rev.tif	1feb18_LEW_m1	LEW male	LEW	male	Dom	M.musculus	6mar18_1feb18_LEW_m1_sp1_1_rev.tif_Batch9
Batch9		5jul17_8may17_LEW_m1_sp1_14_rev.tif	676-15471-17820.tif	2	20	23	yes	yes	0	0	5jul17_8may17_LEW_m1_sp1_14_rev.tif	8may17_LEW_m1	LEW male	LEW	male	Dom	M.musculus	5jul17_8may17_LEW_m1_sp1_14_rev.tif_Batch9
Batch9		5jul17_8may17_LEW_m1_sp1_13_rev.tif	8216-12369-32100.tif	2	20	20	no	yes	2	0	5jul17_8may17_LEW_m1_sp1_13_rev.tif	8may17_LEW_m1	LEW male	LEW	male	Dom	M.musculus	5jul17_8may17_LEW_m1_sp1_13_rev.tif_Batch9
Batch9		5jul17_8may17_LEW_m1_sp1_26_rev.tif	8517-10653-30056.tif	2	20	21	no	yes	0	0	5jul17_8may17_LEW_m1_sp1_26_rev.tif	8may17_LEW_m1	LEW male	LEW	male	Dom	M.musculus	5jul17_8may17_LEW_m1_sp1_26_rev.tif_Batch9
Batch11		9jun18_8may17_LEW_m1_sp1_20_rev.tif	10470-6273-31517.tif	2	20	19	no	no	1	0	9jun18_8may17_LEW_m1_sp1_20_rev.tif	8may17_LEW_m1	LEW male	LEW	male	Dom	M.musculus	9jun18_8may17_LEW_m1_sp1_20_rev.tif_Batch11
Batch11		21jun18_18feb18_LEW_m3_sp2_2_rev.tif	21871-14330-8053.tif	2	20	21	yes	no	2	0	21jun18_18feb18_LEW_m3_sp2_2_rev.tif	18feb18_LEW_m3	LEW male	LEW	male	Dom	M.musculus	21jun18_18feb18_LEW_m3_sp2_2_rev.tif_Batch11
Batch11		9jun18_8may17_LEW_m1_sp1_19.2_rev.tif	29013-16681-13942.tif	2	20	21	yes	yes	0	0	9jun18_8may17_LEW_m1_sp1_19.2_rev.tif	8may17_LEW_m1	LEW male	LEW	male	Dom	M.musculus	9jun18_8may17_LEW_m1_sp1_19.2_rev.tif_Batch11
Batch11		21jun18_18feb18_LEW_m3_sp2_1_rev.tif	6887-6382-15287.tif	2	20	23	no	yes	1	0	21jun18_18feb18_LEW_m3_sp2_1_rev.tif	18feb18_LEW_m3	LEW male	LEW	male	Dom	M.musculus	21jun18_18feb18_LEW_m3_sp2_1_rev.tif_Batch11
Batch11		21jun18_18feb18_LEW_m3_sp2_12_rev.tif	20944-2176-12627.tif	2	20	23	no	yes	0	0	21jun18_18feb18_LEW_m3_sp2_12_rev.tif	18feb18_LEW_m3	LEW male	LEW	male	Dom	M.musculus	21jun18_18feb18_LEW_m3_sp2_12_rev.tif_Batch11
Batch11		3mar15_13jan17_LEW_m1_sp1_28_rev.tif	785-32337-28171.tif	2	20	24	no	yes	0	0	3mar15_13jan17_LEW_m1_sp1_28_rev.tif	13jan17_LEW_m1	LEW male	LEW	male	Dom	M.musculus	3mar15_13jan17_LEW_m1_sp1_28_rev.tif_Batch11
Batch11		9jun18_8may17_LEW_m1_sp1_12_rev.tif	18688-869-22457.tif	2	20	28	no	yes	0	0	9jun18_8may17_LEW_m1_sp1_12_rev.tif	8may17_LEW_m1	LEW male	LEW	male	Dom	M.musculus	9jun18_8may17_LEW_m1_sp1_12_rev.tif_Batch11
Batch18		6mar18_1feb18_LEW_m1_sp1_16_rev.tif	20725-22779-24220.tif	2	20	23	no	yes	0	0	6mar18_1feb18_LEW_m1_sp1_16_rev.tif	1feb18_LEW_m1	LEW male	LEW	male	Dom	M.musculus	6mar18_1feb18_LEW_m1_sp1_16_rev.tif_Batch18
Batch18		6mar18_1feb18_LEW_m1_sp1_2_rev.tif	15779-14532-918.tif	2	20	22	yes	yes	0	0	6mar18_1feb18_LEW_m1_sp1_2_rev.tif	1feb18_LEW_m1	LEW male	LEW	male	Dom	M.musculus	6mar18_1feb18_LEW_m1_sp1_2_rev.tif_Batch18
Batch18		6mar18_1feb18_LEW_m1_sp1_6.2_rev.tif	1942-24107-29231.tif	2	20	22	no	yes	0	0	6mar18_1feb18_LEW_m1_sp1_6.2_rev.tif	1feb18_LEW_m1	LEW male	LEW	male	Dom	M.musculus	6mar18_1feb18_LEW_m1_sp1_6.2_rev.tif_Batch18
Batch17		4nov19_29oct19_MOLF_f1_sp2_32_rev.tif	12689-10506-2418.tif	2	20	32			0	1	4nov19_29oct19_MOLF_f1_sp2_32_rev.tif	29oct19_MOLF_f1	MOLF female	MOLF	female	Mol	M.musculus	4nov19_29oct19_MOLF_f1_sp2_32_rev.tif_Batch17
Batch17		4nov19_29oct19_MOLF_f1_sp2_42_rev.tif	22741-22757-5745.tif	2	20	24			1	0	4nov19_29oct19_MOLF_f1_sp2_42_rev.tif	29oct19_MOLF_f1	MOLF female	MOLF	female	Mol	M.musculus	4nov19_29oct19_MOLF_f1_sp2_42_rev.tif_Batch17
Batch17		4nov19_29oct19_MOLF_f1_sp2_45_rev.tif	28976-28312-20715.tif	2	20	25			0	0	4nov19_29oct19_MOLF_f1_sp2_45_rev.tif	29oct19_MOLF_f1	MOLF female	MOLF	female	Mol	M.musculus	4nov19_29oct19_MOLF_f1_sp2_45_rev.tif_Batch17
Batch11		13sep18_28jun18_MOLF_m1_sp1_26_rev.tif	30968-14524-8564.tif	2	20	24	no	yes	0	0	13sep18_28jun18_MOLF_m1_sp1_26_rev.tif	28jun18_MOLF_m1	MOLF male	MOLF	male	Mol	M.musculus	13sep18_28jun18_MOLF_m1_sp1_26_rev.tif_Batch11
Batch11		13sep18_28jun18_MOLF_m1_sp1_28_rev.tif	19695-27472-16810.tif	2	20	25	no	yes	1	0	13sep18_28jun18_MOLF_m1_sp1_28_rev.tif	28jun18_MOLF_m1	MOLF male	MOLF	male	Mol	M.musculus	13sep18_28jun18_MOLF_m1_sp1_28_rev.tif_Batch11
Batch11		13sep18_28jun18_MOLF_m1_sp1_12.1_rev.tif	12716-29291-20919.tif	2	20	25	no	yes	1	0	13sep18_28jun18_MOLF_m1_sp1_12.1_rev.tif	28jun18_MOLF_m1	MOLF male	MOLF	male	Mol	M.musculus	13sep18_28jun18_MOLF_m1_sp1_12.1_rev.tif_Batch11
Batch11		13sep18_28jun18_MOLF_m1_sp1_4.3_rev.tif	22653-20622-12730.tif	2	20	26	no	yes	0	0	13sep18_28jun18_MOLF_m1_sp1_4.3_rev.tif	28jun18_MOLF_m1	MOLF male	MOLF	male	Mol	M.musculus	13sep18_28jun18_MOLF_m1_sp1_4.3_rev.tif_Batch11
Batch11		13sep18_28jun18_MOLF_m1_sp1_30_rev.tif	25936-784-3768.tif	2	20	26	no	yes	1	0	13sep18_28jun18_MOLF_m1_sp1_30_rev.tif	28jun18_MOLF_m1	MOLF male	MOLF	male	Mol	M.musculus	13sep18_28jun18_MOLF_m1_sp1_30_rev.tif_Batch11
Batch15		4jun19_28sep18_MOLF_m1_sp1_13_rev.tif	27365-15483-10586.tif	2	20	21	no	yes	0	0	4jun19_28sep18_MOLF_m1_sp1_13_rev.tif	28sep18_MOLF_m1	MOLF male	MOLF	male	Mol	M.musculus	4jun19_28sep18_MOLF_m1_sp1_13_rev.tif_Batch15
Batch15		9jan19_27oct18_MOLF_m2_sp1_26.1_rev.tif	388-2630-31772.tif	2	20	21	no	yes	0	0	9jan19_27oct18_MOLF_m2_sp1_26.1_rev.tif	27oct18_MOLF_m2	MOLF male	MOLF	male	Mol	M.musculus	9jan19_27oct18_MOLF_m2_sp1_26.1_rev.tif_Batch15
Batch15		18jul19_1mar19_MOLF_m1_sp1_9.1_rev.tif	11892-28501-22378.tif	2	20	22	no	yes	1	0	18jul19_1mar19_MOLF_m1_sp1_9.1_rev.tif	1mar19_MOLF_m1	MOLF male	MOLF	male	Mol	M.musculus	18jul19_1mar19_MOLF_m1_sp1_9.1_rev.tif_Batch15
Batch15		18jul19_1mar19_MOLF_m1_sp1_11_rev.tif	6633-10265-32739.tif	2	20	22	no	yes	0	0	18jul19_1mar19_MOLF_m1_sp1_11_rev.tif	1mar19_MOLF_m1	MOLF male	MOLF	male	Mol	M.musculus	18jul19_1mar19_MOLF_m1_sp1_11_rev.tif_Batch15
Batch15		9jan19_27oct18_MOLF_m2_sp1_4.1_rev.tif	17410-13175-3446.tif	2	20	23	no	yes	0	0	9jan19_27oct18_MOLF_m2_sp1_4.1_rev.tif	27oct18_MOLF_m2	MOLF male	MOLF	male	Mol	M.musculus	9jan19_27oct18_MOLF_m2_sp1_4.1_rev.tif_Batch15
Batch15		9jan19_27oct18_MOLF_m2_sp1_27_rev.tif	19195-22315-22114.tif	2	20	23	no	yes	0	0	9jan19_27oct18_MOLF_m2_sp1_27_rev.tif	27oct18_MOLF_m2	MOLF male	MOLF	male	Mol	M.musculus	9jan19_27oct18_MOLF_m2_sp1_27_rev.tif_Batch15
Batch15		9jan19_27oct18_MOLF_m2_sp1_30_rev.tif	26703-30692-20435.tif	2	20	23	no	yes	0	0	9jan19_27oct18_MOLF_m2_sp1_30_rev.tif	27oct18_MOLF_m2	MOLF male	MOLF	male	Mol	M.musculus	9jan19_27oct18_MOLF_m2_sp1_30_rev.tif_Batch15
Batch15		18jul19_1mar19_MOLF_m1_sp1_15_rev.tif	2967-28380-10176.tif	2	20	23	no	yes	0	0	18jul19_1mar19_MOLF_m1_sp1_15_rev.tif	1mar19_MOLF_m1	MOLF male	MOLF	male	Mol	M.musculus	18jul19_1mar19_MOLF_m1_sp1_15_rev.tif_Batch15
Batch15		9jan19_27oct18_MOLF_m2_sp1_19.1_rev.tif	31798-14863-1306.tif	2	20	23	no	yes	0	0	9jan19_27oct18_MOLF_m2_sp1_19.1_rev.tif	27oct18_MOLF_m2	MOLF male	MOLF	male	Mol	M.musculus	9jan19_27oct18_MOLF_m2_sp1_19.1_rev.tif_Batch15
Batch15		18jul19_1mar19_MOLF_m1_sp1_30.2_rev.tif	1196-1302-21911.tif	2	20	24	no	yes	0	0	18jul19_1mar19_MOLF_m1_sp1_30.2_rev.tif	1mar19_MOLF_m1	MOLF male	MOLF	male	Mol	M.musculus	18jul19_1mar19_MOLF_m1_sp1_30.2_rev.tif_Batch15
Batch15		18jul19_1mar19_MOLF_m1_sp1_7.2_rev.tif	11357-31504-5649.tif	2	20	25	no	yes	1	0	18jul19_1mar19_MOLF_m1_sp1_7.2_rev.tif	1mar19_MOLF_m1	MOLF male	MOLF	male	Mol	M.musculus	18jul19_1mar19_MOLF_m1_sp1_7.2_rev.tif_Batch15
Batch15		9jan19_27oct18_MOLF_m2_sp1_15_rev.tif	15267-17609-6608.tif	2	20	25	no	yes	1	0	9jan19_27oct18_MOLF_m2_sp1_15_rev.tif	27oct18_MOLF_m2	MOLF male	MOLF	male	Mol	M.musculus	9jan19_27oct18_MOLF_m2_sp1_15_rev.tif_Batch15
Batch15		18jul19_1mar19_MOLF_m1_sp1_29.1_rev.tif	27668-31000-26659.tif	2	20	25	no	yes	1	0	18jul19_1mar19_MOLF_m1_sp1_29.1_rev.tif	1mar19_MOLF_m1	MOLF male	MOLF	male	Mol	M.musculus	18jul19_1mar19_MOLF_m1_sp1_29.1_rev.tif_Batch15
Batch15		18jul19_1mar19_MOLF_m1_sp1_20_rev.tif	4489-15650-9914.tif	2	20	25	no	yes	0	0	18jul19_1mar19_MOLF_m1_sp1_20_rev.tif	1mar19_MOLF_m1	MOLF male	MOLF	male	Mol	M.musculus	18jul19_1mar19_MOLF_m1_sp1_20_rev.tif_Batch15
Batch15		9jan19_27oct18_MOLF_m2_sp1_18_rev.tif	21887-16549-7860.tif	2	20	26	no	yes	0	0	9jan19_27oct18_MOLF_m2_sp1_18_rev.tif	27oct18_MOLF_m2	MOLF male	MOLF	male	Mol	M.musculus	9jan19_27oct18_MOLF_m2_sp1_18_rev.tif_Batch15
Batch15		9jan19_27oct18_MOLF_m2_sp1_16.1_rev.tif	29313-9612-18374.tif	2	20	26	yes	es	0	0	9jan19_27oct18_MOLF_m2_sp1_16.1_rev.tif	27oct18_MOLF_m2	MOLF male	MOLF	male	Mol	M.musculus	9jan19_27oct18_MOLF_m2_sp1_16.1_rev.tif_Batch15
Batch15		18jul19_1mar19_MOLF_m1_sp1_30.1_rev.tif	30774-29301-20981.tif	2	20	26	no	yes	1	0	18jul19_1mar19_MOLF_m1_sp1_30.1_rev.tif	1mar19_MOLF_m1	MOLF male	MOLF	male	Mol	M.musculus	18jul19_1mar19_MOLF_m1_sp1_30.1_rev.tif_Batch15
Batch15		18jul19_1mar19_MOLF_m1_sp1_27.1_rev.tif	900-21751-6407.tif	2	20	26	no	yes	1	0	18jul19_1mar19_MOLF_m1_sp1_27.1_rev.tif	1mar19_MOLF_m1	MOLF male	MOLF	male	Mol	M.musculus	18jul19_1mar19_MOLF_m1_sp1_27.1_rev.tif_Batch15
Batch15		18jul19_1mar19_MOLF_m1_sp1_27.2_rev.tif	28687-23554-29942.tif	2	20	29	no	yes	0	0	18jul19_1mar19_MOLF_m1_sp1_27.2_rev.tif	1mar19_MOLF_m1	MOLF male	MOLF	male	Mol	M.musculus	18jul19_1mar19_MOLF_m1_sp1_27.2_rev.tif_Batch15
Batch15		18jul19_1mar19_MOLF_m1_sp1_3_rev.tif	23685-21849-7479.tif	2	20	33	no	yes	0	0	18jul19_1mar19_MOLF_m1_sp1_3_rev.tif	1mar19_MOLF_m1	MOLF male	MOLF	male	Mol	M.musculus	18jul19_1mar19_MOLF_m1_sp1_3_rev.tif_Batch15
Batch16		2aug19_28sep18_MOLF_m2_sp1_5_rev.tif	28817-6870-1705.tif	2	20	23	no	yes	0	0	2aug19_28sep18_MOLF_m2_sp1_5_rev.tif	28sep18_MOLF_m2	MOLF male	MOLF	male	Mol	M.musculus	2aug19_28sep18_MOLF_m2_sp1_5_rev.tif_Batch16
Batch16		2aug19_28sep18_MOLF_m2_sp1_17_rev.tif	12269-23238-26416.tif	2	20	28	no	no	0	0	2aug19_28sep18_MOLF_m2_sp1_17_rev.tif	28sep18_MOLF_m2	MOLF male	MOLF	male	Mol	M.musculus	2aug19_28sep18_MOLF_m2_sp1_17_rev.tif_Batch16
Batch16		2aug19_28sep18_MOLF_m2_sp1_14.1_rev.tif	2094-3744-4871.tif	2	20	24	no	yes	0	0	2aug19_28sep18_MOLF_m2_sp1_14.1_rev.tif	28sep18_MOLF_m2	MOLF male	MOLF	male	Mol	M.musculus	2aug19_28sep18_MOLF_m2_sp1_14.1_rev.tif_Batch16
Batch16		2aug19_28sep18_MOLF_m2_sp1_11_rev.tif	26902-18525-20356.tif	2	20	22	no	no	0	0	2aug19_28sep18_MOLF_m2_sp1_11_rev.tif	28sep18_MOLF_m2	MOLF male	MOLF	male	Mol	M.musculus	2aug19_28sep18_MOLF_m2_sp1_11_rev.tif_Batch16
Batch16		2aug19_28sep18_MOLF_m2_sp1_1_rev.tif	9885-20904-20117.tif	2	20	21	no	yes	0	0	2aug19_28sep18_MOLF_m2_sp1_1_rev.tif	28sep18_MOLF_m2	MOLF male	MOLF	male	Mol	M.musculus	2aug19_28sep18_MOLF_m2_sp1_1_rev.tif_Batch16
batch10		24jan18_31dec17_MSM_f3_sp1_21_rev.tif	19047-15103-16398.tif	2	20	20	no		2	1	24jan18_31dec17_MSM_f3_sp1_21_rev.tif	31dec17_MSM_f3	MSM female	MSM	female	Mol	M.musculus	24jan18_31dec17_MSM_f3_sp1_21_rev.tif_batch10
batch10		22jan18_31dec17_MSM_f1_sp1_28_rev.tif	17645-11482-26250.tif	2	20	21	no		2	3	22jan18_31dec17_MSM_f1_sp1_28_rev.tif	31dec17_MSM_f1	MSM female	MSM	female	Mol	M.musculus	22jan18_31dec17_MSM_f1_sp1_28_rev.tif_batch10
batch10		24jan18_31dec17_MSM_f3_sp1_2_rev.tif	9383-29893-2029.tif	2	20	22	no		0	1	24jan18_31dec17_MSM_f3_sp1_2_rev.tif	31dec17_MSM_f3	MSM female	MSM	female	Mol	M.musculus	24jan18_31dec17_MSM_f3_sp1_2_rev.tif_batch10
batch10		24jan18_31dec17_MSM_f3_sp1_13_rev.tif	23279-19950-21594.tif	2	20	23	no		0	1	24jan18_31dec17_MSM_f3_sp1_13_rev.tif	31dec17_MSM_f3	MSM female	MSM	female	Mol	M.musculus	24jan18_31dec17_MSM_f3_sp1_13_rev.tif_batch10
batch10		26jan18_31dec17_MSM_f4_sp1_7_rev.tif	14835-22123-9164.tif	2	20	23	no		1	0	26jan18_31dec17_MSM_f4_sp1_7_rev.tif	31dec17_MSM_f4	MSM female	MSM	female	Mol	M.musculus	26jan18_31dec17_MSM_f4_sp1_7_rev.tif_batch10
batch10		23jan18_31dec17_MSM_f2_sp1_22_rev.tif	16865-11856-30764.tif	2	20	24	no		1	0	23jan18_31dec17_MSM_f2_sp1_22_rev.tif	31dec17_MSM_f2	MSM female	MSM	female	Mol	M.musculus	23jan18_31dec17_MSM_f2_sp1_22_rev.tif_batch10
batch10		26jan18_31dec17_MSM_f5_sp1_11_rev.tif	830-5302-3012.tif	2	20	25	no		2	2	26jan18_31dec17_MSM_f5_sp1_11_rev.tif	31dec17_MSM_f5	MSM female	MSM	female	Mol	M.musculus	26jan18_31dec17_MSM_f5_sp1_11_rev.tif_batch10
batch10		26jan18_31dec17_MSM_f4_sp1_14_rev.tif	16323-8281-29986.tif	2	20	25	no		0	1	26jan18_31dec17_MSM_f4_sp1_14_rev.tif	31dec17_MSM_f4	MSM female	MSM	female	Mol	M.musculus	26jan18_31dec17_MSM_f4_sp1_14_rev.tif_batch10
batch10		26jan18_31dec17_MSM_f5_sp1_3.1_rev.tif	12255-30001-15407.tif	2	20	27	no		0	1	26jan18_31dec17_MSM_f5_sp1_3.1_rev.tif	31dec17_MSM_f5	MSM female	MSM	female	Mol	M.musculus	26jan18_31dec17_MSM_f5_sp1_3.1_rev.tif_batch10
batch10		23jan18_31dec17_MSM_f2_sp1_11_rev.tif	20018-2412-8539.tif	2	20	27	no		0	3	23jan18_31dec17_MSM_f2_sp1_11_rev.tif	31dec17_MSM_f2	MSM female	MSM	female	Mol	M.musculus	23jan18_31dec17_MSM_f2_sp1_11_rev.tif_batch10
batch10		26jan18_31dec17_MSM_f4_sp1_10_rev.tif	10965-16601-31427.tif	2	20	27	no		1	2	26jan18_31dec17_MSM_f4_sp1_10_rev.tif	31dec17_MSM_f4	MSM female	MSM	female	Mol	M.musculus	26jan18_31dec17_MSM_f4_sp1_10_rev.tif_batch10
batch10		26jan18_31dec17_MSM_f5_sp1_20_rev.tif	3216-9089-30385.tif	2	20	27	no		0	1	26jan18_31dec17_MSM_f5_sp1_20_rev.tif	31dec17_MSM_f5	MSM female	MSM	female	Mol	M.musculus	26jan18_31dec17_MSM_f5_sp1_20_rev.tif_batch10
batch10		23jan18_31dec17_MSM_f2_sp1_6_rev.tif	19656-23578-15510.tif	2	20	27	no		3	1	23jan18_31dec17_MSM_f2_sp1_6_rev.tif	31dec17_MSM_f2	MSM female	MSM	female	Mol	M.musculus	23jan18_31dec17_MSM_f2_sp1_6_rev.tif_batch10
batch10		22jan18_31dec17_MSM_f1_sp1_6_rev.tif	25017-1581-21803.tif	2	20	27	no		1	2	22jan18_31dec17_MSM_f1_sp1_6_rev.tif	31dec17_MSM_f1	MSM female	MSM	female	Mol	M.musculus	22jan18_31dec17_MSM_f1_sp1_6_rev.tif_batch10
batch10		26jan18_31dec17_MSM_f5_sp1_14_rev.tif	21837-18956-6951.tif	2	20	28	no		0	0	26jan18_31dec17_MSM_f5_sp1_14_rev.tif	31dec17_MSM_f5	MSM female	MSM	female	Mol	M.musculus	26jan18_31dec17_MSM_f5_sp1_14_rev.tif_batch10
batch10		23jan18_31dec17_MSM_f2_sp1_15_rev.tif	14547-8998-30231.tif	2	20	28	no		0	0	23jan18_31dec17_MSM_f2_sp1_15_rev.tif	31dec17_MSM_f2	MSM female	MSM	female	Mol	M.musculus	23jan18_31dec17_MSM_f2_sp1_15_rev.tif_batch10
batch10		22jan18_31dec17_MSM_f1_sp1_16_rev.tif	17312-10409-17137.tif	2	20	28	no		0	2	22jan18_31dec17_MSM_f1_sp1_16_rev.tif	31dec17_MSM_f1	MSM female	MSM	female	Mol	M.musculus	22jan18_31dec17_MSM_f1_sp1_16_rev.tif_batch10
batch10		26jan18_31dec17_MSM_f5_sp1_26_rev.tif	27350-28808-5669.tif	2	20	29	yes		0	0	26jan18_31dec17_MSM_f5_sp1_26_rev.tif	31dec17_MSM_f5	MSM female	MSM	female	Mol	M.musculus	26jan18_31dec17_MSM_f5_sp1_26_rev.tif_batch10
batch10		22jan18_31dec17_MSM_f1_sp1_15_rev.tif	2200-11012-10501.tif	2	20	30	no		0	0	22jan18_31dec17_MSM_f1_sp1_15_rev.tif	31dec17_MSM_f1	MSM female	MSM	female	Mol	M.musculus	22jan18_31dec17_MSM_f1_sp1_15_rev.tif_batch10
batch10		26jan18_31dec17_MSM_f4_sp1_29_rev.tif	6075-21569-685.tif	2	20	30	no		0	0	26jan18_31dec17_MSM_f4_sp1_29_rev.tif	31dec17_MSM_f4	MSM female	MSM	female	Mol	M.musculus	26jan18_31dec17_MSM_f4_sp1_29_rev.tif_batch10
batch10		26jan18_31dec17_MSM_f4_sp1_28_rev.tif	14815-14714-17414.tif	2	20	31	no		0	0	26jan18_31dec17_MSM_f4_sp1_28_rev.tif	31dec17_MSM_f4	MSM female	MSM	female	Mol	M.musculus	26jan18_31dec17_MSM_f4_sp1_28_rev.tif_batch10
batch10		24jan18_31dec17_MSM_f3_sp1_8_rev.tif	25662-9362-15199.tif	2	20	32	no		0	1	24jan18_31dec17_MSM_f3_sp1_8_rev.tif	31dec17_MSM_f3	MSM female	MSM	female	Mol	M.musculus	24jan18_31dec17_MSM_f3_sp1_8_rev.tif_batch10
batch10		22jan18_31dec17_MSM_f1_sp1_29_rev.tif	2948-29475-4750.tif	2	20	34	no		0	0	22jan18_31dec17_MSM_f1_sp1_29_rev.tif	31dec17_MSM_f1	MSM female	MSM	female	Mol	M.musculus	22jan18_31dec17_MSM_f1_sp1_29_rev.tif_batch10
batch10		26jan18_31dec17_MSM_f5_sp1_2_rev.tif	24356-31586-6665.tif	2	20	34	no		0	2	26jan18_31dec17_MSM_f5_sp1_2_rev.tif	31dec17_MSM_f5	MSM female	MSM	female	Mol	M.musculus	26jan18_31dec17_MSM_f5_sp1_2_rev.tif_batch10
batch10		26jan18_31dec17_MSM_f4_sp1_15_rev.tif	25877-5254-27077.tif	2	20	37	no		0	0	26jan18_31dec17_MSM_f4_sp1_15_rev.tif	31dec17_MSM_f4	MSM female	MSM	female	Mol	M.musculus	26jan18_31dec17_MSM_f4_sp1_15_rev.tif_batch10
batch10		26jan18_31dec17_MSM_f4_sp1_25_rev.tif	32656-21132-11699.tif	2	20	37	no		0	0	26jan18_31dec17_MSM_f4_sp1_25_rev.tif	31dec17_MSM_f4	MSM female	MSM	female	Mol	M.musculus	26jan18_31dec17_MSM_f4_sp1_25_rev.tif_batch10
Batch4		22nov16_13nov16_MSM_f2_sp1_13_rev.tif	6962-32748-2863.tif	2	20	29			0	1	22nov16_13nov16_MSM_f2_sp1_13_rev.tif	13nov16_MSM_f2	MSM female	MSM	female	Mol	M.musculus	22nov16_13nov16_MSM_f2_sp1_13_rev.tif_Batch4
Batch4		22nov16_13nov16_MSM_f2_sp1_16_rev.tif	3475-13866-4422.tif	2	20	26			2	0	22nov16_13nov16_MSM_f2_sp1_16_rev.tif	13nov16_MSM_f2	MSM female	MSM	female	Mol	M.musculus	22nov16_13nov16_MSM_f2_sp1_16_rev.tif_Batch4
Batch4		22nov16_13nov16_MSM_f2_sp1_17_rev.tif	9725-18341-3447.tif	2	20	28			0	3	22nov16_13nov16_MSM_f2_sp1_17_rev.tif	13nov16_MSM_f2	MSM female	MSM	female	Mol	M.musculus	22nov16_13nov16_MSM_f2_sp1_17_rev.tif_Batch4
Batch4		22nov16_13nov16_MSM_f2_sp1_19_rev.tif	2072-8336-32613.tif	2	20	31			0	1	22nov16_13nov16_MSM_f2_sp1_19_rev.tif	13nov16_MSM_f2	MSM female	MSM	female	Mol	M.musculus	22nov16_13nov16_MSM_f2_sp1_19_rev.tif_Batch4
Batch4		22nov16_13nov16_MSM_f2_sp1_4.1_rev.tif	16557-16385-5438.tif	2	20	32			0	2	22nov16_13nov16_MSM_f2_sp1_4.1_rev.tif	13nov16_MSM_f2	MSM female	MSM	female	Mol	M.musculus	22nov16_13nov16_MSM_f2_sp1_4.1_rev.tif_Batch4
Batch4		22nov16_13nov16_MSM_f2_sp1_6_rev.tif	23930-12748-11431.tif	2	20	25			0	1	22nov16_13nov16_MSM_f2_sp1_6_rev.tif	13nov16_MSM_f2	MSM female	MSM	female	Mol	M.musculus	22nov16_13nov16_MSM_f2_sp1_6_rev.tif_Batch4
Batch4		22nov16_30sep16_MSM_f2_sp1_13.1_rev.tif	14346-13395-25407.tif	2	20	23			1	0	22nov16_30sep16_MSM_f2_sp1_13.1_rev.tif	30sep16_MSM_f2	MSM female	MSM	female	Mol	M.musculus	22nov16_30sep16_MSM_f2_sp1_13.1_rev.tif_Batch4
Batch4		22nov16_30sep16_MSM_f2_sp1_14.2_rev.tif	30022-553-5067.tif	2	20	22			0	0	22nov16_30sep16_MSM_f2_sp1_14.2_rev.tif	30sep16_MSM_f2	MSM female	MSM	female	Mol	M.musculus	22nov16_30sep16_MSM_f2_sp1_14.2_rev.tif_Batch4
Batch4		22nov16_30sep16_MSM_f2_sp1_16_rev.tif	28385-14046-13180.tif	2	20	28			2	1	22nov16_30sep16_MSM_f2_sp1_16_rev.tif	30sep16_MSM_f2	MSM female	MSM	female	Mol	M.musculus	22nov16_30sep16_MSM_f2_sp1_16_rev.tif_Batch4
Batch4		22nov16_30sep16_MSM_f2_sp1_20_rev.tif	25549-4545-32334.tif	2	20	24			2	0	22nov16_30sep16_MSM_f2_sp1_20_rev.tif	30sep16_MSM_f2	MSM female	MSM	female	Mol	M.musculus	22nov16_30sep16_MSM_f2_sp1_20_rev.tif_Batch4
Batch4		22nov16_30sep16_MSM_f2_sp1_23_rev.tif	6340-22038-3154.tif	2	20	34			1	0	22nov16_30sep16_MSM_f2_sp1_23_rev.tif	30sep16_MSM_f2	MSM female	MSM	female	Mol	M.musculus	22nov16_30sep16_MSM_f2_sp1_23_rev.tif_Batch4
Batch4		22nov16_30sep16_MSM_f2_sp1_24_rev.tif	1653-19257-1624.tif	2	20	26			0	1	22nov16_30sep16_MSM_f2_sp1_24_rev.tif	30sep16_MSM_f2	MSM female	MSM	female	Mol	M.musculus	22nov16_30sep16_MSM_f2_sp1_24_rev.tif_Batch4
Batch4		22nov16_30sep16_MSM_f2_sp1_25_rev.tif	4072-31973-10648.tif	2	20	36			0	2	22nov16_30sep16_MSM_f2_sp1_25_rev.tif	30sep16_MSM_f2	MSM female	MSM	female	Mol	M.musculus	22nov16_30sep16_MSM_f2_sp1_25_rev.tif_Batch4
Batch4		22nov16_30sep16_MSM_f2_sp1_3_rev.tif	17340-1046-858.tif	2	20	35			0	0	22nov16_30sep16_MSM_f2_sp1_3_rev.tif	30sep16_MSM_f2	MSM female	MSM	female	Mol	M.musculus	22nov16_30sep16_MSM_f2_sp1_3_rev.tif_Batch4
Batch4		22nov16_30sep16_MSM_f2_sp1_5_rev.tif	1862-23344-26945.tif	2	20	28			0	1	22nov16_30sep16_MSM_f2_sp1_5_rev.tif	30sep16_MSM_f2	MSM female	MSM	female	Mol	M.musculus	22nov16_30sep16_MSM_f2_sp1_5_rev.tif_Batch4
Batch4		22nov16_30sep16_MSM_f2_sp1_8.1_rev.tif	12524-21447-8781.tif	2	20	28			0	0	22nov16_30sep16_MSM_f2_sp1_8.1_rev.tif	30sep16_MSM_f2	MSM female	MSM	female	Mol	M.musculus	22nov16_30sep16_MSM_f2_sp1_8.1_rev.tif_Batch4
Batch4		29nov16_13nov16_MSM_f1_sp1_13_rev.tif	25874-25373-20374.tif	2	20	34			0	1	29nov16_13nov16_MSM_f1_sp1_13_rev.tif	13nov16_MSM_f1	MSM female	MSM	female	Mol	M.musculus	29nov16_13nov16_MSM_f1_sp1_13_rev.tif_Batch4
Batch4		29nov16_13nov16_MSM_f1_sp1_14_rev.tif	32014-26605-10661.tif	2	20	31			0	1	29nov16_13nov16_MSM_f1_sp1_14_rev.tif	13nov16_MSM_f1	MSM female	MSM	female	Mol	M.musculus	29nov16_13nov16_MSM_f1_sp1_14_rev.tif_Batch4
Batch4		29nov16_13nov16_MSM_f1_sp1_16_rev.tif	10080-25021-12361.tif	2	20	23			0	0	29nov16_13nov16_MSM_f1_sp1_16_rev.tif	13nov16_MSM_f1	MSM female	MSM	female	Mol	M.musculus	29nov16_13nov16_MSM_f1_sp1_16_rev.tif_Batch4
Batch4		29nov16_13nov16_MSM_f1_sp1_17_rev.tif	32170-5289-5046.tif	2	20	23			3	0	29nov16_13nov16_MSM_f1_sp1_17_rev.tif	13nov16_MSM_f1	MSM female	MSM	female	Mol	M.musculus	29nov16_13nov16_MSM_f1_sp1_17_rev.tif_Batch4
Batch4		29nov16_13nov16_MSM_f1_sp1_25_rev.tif	29905-30491-31503.tif	2	20	32			0	0	29nov16_13nov16_MSM_f1_sp1_25_rev.tif	13nov16_MSM_f1	MSM female	MSM	female	Mol	M.musculus	29nov16_13nov16_MSM_f1_sp1_25_rev.tif_Batch4
Batch4		29nov16_13nov16_MSM_f1_sp1_26_rev.tif	12522-25508-16969.tif	2	20	27			2	0	29nov16_13nov16_MSM_f1_sp1_26_rev.tif	13nov16_MSM_f1	MSM female	MSM	female	Mol	M.musculus	29nov16_13nov16_MSM_f1_sp1_26_rev.tif_Batch4
Batch4		29nov16_13nov16_MSM_f1_sp1_28_rev.tif	8505-24245-27254.tif	2	20	32			1	0	29nov16_13nov16_MSM_f1_sp1_28_rev.tif	13nov16_MSM_f1	MSM female	MSM	female	Mol	M.musculus	29nov16_13nov16_MSM_f1_sp1_28_rev.tif_Batch4
Batch5		5aug17_14jul17_MSM_f1_sp1_27_rev.tif	8211-19352-30858.tif	2	20	25	no		0	2	5aug17_14jul17_MSM_f1_sp1_27_rev.tif	14jul17_MSM_f1	MSM female	MSM	female	Mol	M.musculus	5aug17_14jul17_MSM_f1_sp1_27_rev.tif_Batch5
Batch5		5aug17_14jul17_MSM_f1_sp1_2_rev.tif	20065-13639-3079.tif	2	20	26	no		1	0	5aug17_14jul17_MSM_f1_sp1_2_rev.tif	14jul17_MSM_f1	MSM female	MSM	female	Mol	M.musculus	5aug17_14jul17_MSM_f1_sp1_2_rev.tif_Batch5
batch8		4dec17_16nov17_MSM_f2_sp1_16_rev.tif	10037-18836-3492.tif	2	20	29	yes		0	1	4dec17_16nov17_MSM_f2_sp1_16_rev.tif	16nov17_MSM_f2	MSM female	MSM	female	Mol	M.musculus	4dec17_16nov17_MSM_f2_sp1_16_rev.tif_batch8
batch8		21nov17_16nov17_MSM_f3_sp1_1_rev.tif	1144-12189-28861.tif	2	20	32	no		0	0	21nov17_16nov17_MSM_f3_sp1_1_rev.tif	16nov17_MSM_f3	MSM female	MSM	female	Mol	M.musculus	21nov17_16nov17_MSM_f3_sp1_1_rev.tif_batch8
batch8		4dec17_16nov17_MSM_f2_sp1_19.1_rev.tif	12012-496-13559.tif	2	20	38	no		0	1	4dec17_16nov17_MSM_f2_sp1_19.1_rev.tif	16nov17_MSM_f2	MSM female	MSM	female	Mol	M.musculus	4dec17_16nov17_MSM_f2_sp1_19.1_rev.tif_batch8
batch8		29nov17_16nov17_MSM_f1_sp1_9_rev.tif	14456-4858-4465.tif	2	20	26	no		0	1	29nov17_16nov17_MSM_f1_sp1_9_rev.tif	16nov17_MSM_f1	MSM female	MSM	female	Mol	M.musculus	29nov17_16nov17_MSM_f1_sp1_9_rev.tif_batch8
batch8		21nov17_16nov17_MSM_f3_sp1_3_rev.tif	19691-24993-25102.tif	2	20	34	no		0	0	21nov17_16nov17_MSM_f3_sp1_3_rev.tif	16nov17_MSM_f3	MSM female	MSM	female	Mol	M.musculus	21nov17_16nov17_MSM_f3_sp1_3_rev.tif_batch8
batch8		21nov17_16nov17_MSM_f3_sp1_23_rev.tif	20090-4127-1157.tif	2	20	30	no		0	1	21nov17_16nov17_MSM_f3_sp1_23_rev.tif	16nov17_MSM_f3	MSM female	MSM	female	Mol	M.musculus	21nov17_16nov17_MSM_f3_sp1_23_rev.tif_batch8
batch8		29nov17_16nov17_MSM_f1_sp1_8_rev.tif	21185-2140-9608.tif	2	20	28	no		0	0	29nov17_16nov17_MSM_f1_sp1_8_rev.tif	16nov17_MSM_f1	MSM female	MSM	female	Mol	M.musculus	29nov17_16nov17_MSM_f1_sp1_8_rev.tif_batch8
batch8		29nov17_16nov17_MSM_f1_sp1_15.1_rev.tif	22128-3499-16310.tif	2	20	27	yes		0	1	29nov17_16nov17_MSM_f1_sp1_15.1_rev.tif	16nov17_MSM_f1	MSM female	MSM	female	Mol	M.musculus	29nov17_16nov17_MSM_f1_sp1_15.1_rev.tif_batch8
batch8		21nov17_16nov17_MSM_f3_sp1_6_rev.tif	22863-3682-10356.tif	2	20	34	no		0	0	21nov17_16nov17_MSM_f3_sp1_6_rev.tif	16nov17_MSM_f3	MSM female	MSM	female	Mol	M.musculus	21nov17_16nov17_MSM_f3_sp1_6_rev.tif_batch8
batch8		4dec17_16nov17_MSM_f2_sp1_25.1_rev.tif	22871-15776-25783.tif	2	20	28	no		0	3	4dec17_16nov17_MSM_f2_sp1_25.1_rev.tif	16nov17_MSM_f2	MSM female	MSM	female	Mol	M.musculus	4dec17_16nov17_MSM_f2_sp1_25.1_rev.tif_batch8
batch8		29nov17_16nov17_MSM_f1_sp1_2_rev.tif	24580-3765-10835.tif	2	20	30	no		0	0	29nov17_16nov17_MSM_f1_sp1_2_rev.tif	16nov17_MSM_f1	MSM female	MSM	female	Mol	M.musculus	29nov17_16nov17_MSM_f1_sp1_2_rev.tif_batch8
batch8		29nov17_16nov17_MSM_f1_sp1_4.1_rev.tif	24813-1367-6329.tif	2	20	33	yes		0	0	29nov17_16nov17_MSM_f1_sp1_4.1_rev.tif	16nov17_MSM_f1	MSM female	MSM	female	Mol	M.musculus	29nov17_16nov17_MSM_f1_sp1_4.1_rev.tif_batch8
batch8		4dec17_16nov17_MSM_f2_sp1_32_rev.tif	26092-9519-15258.tif	2	20	30	n		0	2	4dec17_16nov17_MSM_f2_sp1_32_rev.tif	16nov17_MSM_f2	MSM female	MSM	female	Mol	M.musculus	4dec17_16nov17_MSM_f2_sp1_32_rev.tif_batch8
batch8		21nov17_16nov17_MSM_f3_sp1_19_rev.tif	26178-18187-9864.tif	2	20	36	no		0	1	21nov17_16nov17_MSM_f3_sp1_19_rev.tif	16nov17_MSM_f3	MSM female	MSM	female	Mol	M.musculus	21nov17_16nov17_MSM_f3_sp1_19_rev.tif_batch8
batch8		21nov17_16nov17_MSM_f3_sp1_14_rev.tif	27089-13925-25420.tif	2	20	33	no		0	0	21nov17_16nov17_MSM_f3_sp1_14_rev.tif	16nov17_MSM_f3	MSM female	MSM	female	Mol	M.musculus	21nov17_16nov17_MSM_f3_sp1_14_rev.tif_batch8
batch8		21nov17_16nov17_MSM_f3_sp1_22_rev.tif	29024-16479-18905.tif	2	20	32	no		0	1	21nov17_16nov17_MSM_f3_sp1_22_rev.tif	16nov17_MSM_f3	MSM female	MSM	female	Mol	M.musculus	21nov17_16nov17_MSM_f3_sp1_22_rev.tif_batch8
batch8		29nov17_16nov17_MSM_f1_sp1_3_rev.tif	31704-2011-22798.tif	2	20	36	n		0	1	29nov17_16nov17_MSM_f1_sp1_3_rev.tif	16nov17_MSM_f1	MSM female	MSM	female	Mol	M.musculus	29nov17_16nov17_MSM_f1_sp1_3_rev.tif_batch8
batch8		21nov17_16nov17_MSM_f3_sp1_10_rev.tif	4754-29614-4115.tif	2	20	28	no		0	1	21nov17_16nov17_MSM_f3_sp1_10_rev.tif	16nov17_MSM_f3	MSM female	MSM	female	Mol	M.musculus	21nov17_16nov17_MSM_f3_sp1_10_rev.tif_batch8
batch8		21nov17_16nov17_MSM_f3_sp1_8_rev.tif	5796-31766-9243.tif	2	20	36	no		0	0	21nov17_16nov17_MSM_f3_sp1_8_rev.tif	16nov17_MSM_f3	MSM female	MSM	female	Mol	M.musculus	21nov17_16nov17_MSM_f3_sp1_8_rev.tif_batch8
batch8		21nov17_16nov17_MSM_f3_sp1_5_rev.tif	6007-19751-1375.tif	2	20	32	no		0	2	21nov17_16nov17_MSM_f3_sp1_5_rev.tif	16nov17_MSM_f3	MSM female	MSM	female	Mol	M.musculus	21nov17_16nov17_MSM_f3_sp1_5_rev.tif_batch8
batch8		21nov17_16nov17_MSM_f3_sp1_15.1_rev.tif	739-22189-4941.tif	2	20	28	no		0	0	21nov17_16nov17_MSM_f3_sp1_15.1_rev.tif	16nov17_MSM_f3	MSM female	MSM	female	Mol	M.musculus	21nov17_16nov17_MSM_f3_sp1_15.1_rev.tif_batch8
batch8		21nov17_16nov17_MSM_f3_sp1_32_rev.tif	8003-12796-22296.tif	2	20	22	no		0	1	21nov17_16nov17_MSM_f3_sp1_32_rev.tif	16nov17_MSM_f3	MSM female	MSM	female	Mol	M.musculus	21nov17_16nov17_MSM_f3_sp1_32_rev.tif_batch8
batch8		5aug17_14jul17_MSM_f1_sp1_6_rev.tif	8229-2855-2034.tif	2	20	26	no		0	2	5aug17_14jul17_MSM_f1_sp1_6_rev.tif	14jul17_MSM_f1	MSM female	MSM	female	Mol	M.musculus	5aug17_14jul17_MSM_f1_sp1_6_rev.tif_batch8
batch8		4dec17_16nov17_MSM_f2_sp1_33_rev.tif	8687-16292-19486.tif	2	20	40	no		0	0	4dec17_16nov17_MSM_f2_sp1_33_rev.tif	16nov17_MSM_f2	MSM female	MSM	female	Mol	M.musculus	4dec17_16nov17_MSM_f2_sp1_33_rev.tif_batch8
batch8		4dec17_16nov17_MSM_f2_sp1_18_rev.tif	9323-9264-13170.tif	2	20	28	no		0	0	4dec17_16nov17_MSM_f2_sp1_18_rev.tif	16nov17_MSM_f2	MSM female	MSM	female	Mol	M.musculus	4dec17_16nov17_MSM_f2_sp1_18_rev.tif_batch8
batch8		21nov17_16nov17_MSM_f3_sp1_17_rev.tif	9775-30774-16843.tif	2	20	34	no		0	0	21nov17_16nov17_MSM_f3_sp1_17_rev.tif	16nov17_MSM_f3	MSM female	MSM	female	Mol	M.musculus	21nov17_16nov17_MSM_f3_sp1_17_rev.tif_batch8
batch8		29nov17_16nov17_MSM_f1_sp1_10_rev.tif	1272-12222-31529.tif	2	20	26	no		1	2	29nov17_16nov17_MSM_f1_sp1_10_rev.tif	16nov17_MSM_f1	MSM female	MSM	female	Mol	M.musculus	29nov17_16nov17_MSM_f1_sp1_10_rev.tif_batch8
batch8		5aug17_14jul17_MSM_f1_sp1_13_rev.tif	28537-23794-19465.tif	2	20	25	no		1	2	5aug17_14jul17_MSM_f1_sp1_13_rev.tif	14jul17_MSM_f1	MSM female	MSM	female	Mol	M.musculus	5aug17_14jul17_MSM_f1_sp1_13_rev.tif_batch8
batch8		21nov17_16nov17_MSM_f3_sp1_18_rev.tif	8578-6822-15696.tif	2	20	26	no		1	0	21nov17_16nov17_MSM_f3_sp1_18_rev.tif	16nov17_MSM_f3	MSM female	MSM	female	Mol	M.musculus	21nov17_16nov17_MSM_f3_sp1_18_rev.tif_batch8
Batch14		1nov16_30sep16_MSM_f1_sp1_53_rev.tif	21531-20339-17779.tif	2	20	37	no		0	1	1nov16_30sep16_MSM_f1_sp1_53_rev.tif	30sep16_MSM_f1	MSM female	MSM	female	Mol	M.musculus	1nov16_30sep16_MSM_f1_sp1_53_rev.tif_Batch14
Batch14		1nov16_30sep16_MSM_f1_sp1_46_rev.tif	5330-14622-2317.tif	2	20	23	no		2	2	1nov16_30sep16_MSM_f1_sp1_46_rev.tif	30sep16_MSM_f1	MSM female	MSM	female	Mol	M.musculus	1nov16_30sep16_MSM_f1_sp1_46_rev.tif_Batch14
Batch14		1nov16_30sep16_MSM_f1_sp1_14_rev.tif	31911-11446-29364.tif	2	20	26	no		0	1	1nov16_30sep16_MSM_f1_sp1_14_rev.tif	30sep16_MSM_f1	MSM female	MSM	female	Mol	M.musculus	1nov16_30sep16_MSM_f1_sp1_14_rev.tif_Batch14
Batch1		16oct16_30sep16_MSM_m1_sp1_16_rev.tif	2761-12299-974.tif	2	20	32	no	y	0	0	16oct16_30sep16_MSM_m1_sp1_16_rev.tif	30sep16_MSM_m1	MSM male	MSM	male	Mol	M.musculus	16oct16_30sep16_MSM_m1_sp1_16_rev.tif_Batch1
Batch1		16oct16_30sep16_MSM_m1_sp1_25_rev.tif	31874-4125-5938.tif	2	20	31	no	y	0	0	16oct16_30sep16_MSM_m1_sp1_25_rev.tif	30sep16_MSM_m1	MSM male	MSM	male	Mol	M.musculus	16oct16_30sep16_MSM_m1_sp1_25_rev.tif_Batch1
Batch1		16oct16_30sep16_MSM_m1_sp1_6_rev.tif	20662-21625-2304.tif	2	20	35	no	yes	1	0	16oct16_30sep16_MSM_m1_sp1_6_rev.tif	30sep16_MSM_m1	MSM male	MSM	male	Mol	M.musculus	16oct16_30sep16_MSM_m1_sp1_6_rev.tif_Batch1
Batch1		16oct16_30sep16_MSM_m1_sp1_8_rev.tif	9965-532-458.tif	2	20	32	no	no	0	0	16oct16_30sep16_MSM_m1_sp1_8_rev.tif	30sep16_MSM_m1	MSM male	MSM	male	Mol	M.musculus	16oct16_30sep16_MSM_m1_sp1_8_rev.tif_Batch1
Batch1		27oct16_31aug16_MSM_m1_sp1_10_rev.tif	11744-3156-7359.tif	2	20	30	no	yes			27oct16_31aug16_MSM_m1_sp1_10_rev.tif	31aug16_MSM_m1	MSM male	MSM	male	Mol	M.musculus	27oct16_31aug16_MSM_m1_sp1_10_rev.tif_Batch1
Batch1		27oct16_31aug16_MSM_m1_sp1_12.1_rev.tif	24741-10716-24065.tif	2	20	32	no	y	0	0	27oct16_31aug16_MSM_m1_sp1_12.1_rev.tif	31aug16_MSM_m1	MSM male	MSM	male	Mol	M.musculus	27oct16_31aug16_MSM_m1_sp1_12.1_rev.tif_Batch1
Batch1		27oct16_31aug16_MSM_m1_sp1_15.1_rev.tif	7860-4163-3070.tif	2	20	34	no	y	0	0	27oct16_31aug16_MSM_m1_sp1_15.1_rev.tif	31aug16_MSM_m1	MSM male	MSM	male	Mol	M.musculus	27oct16_31aug16_MSM_m1_sp1_15.1_rev.tif_Batch1
Batch1		27oct16_31aug16_MSM_m1_sp1_19_rev.tif	4484-10974-8190.tif	2	20	31	no	y	0	0	27oct16_31aug16_MSM_m1_sp1_19_rev.tif	31aug16_MSM_m1	MSM male	MSM	male	Mol	M.musculus	27oct16_31aug16_MSM_m1_sp1_19_rev.tif_Batch1
Batch1		27oct16_31aug16_MSM_m1_sp1_21_rev.tif	29122-13444-15695.tif	2	20	28	no	y	0	0	27oct16_31aug16_MSM_m1_sp1_21_rev.tif	31aug16_MSM_m1	MSM male	MSM	male	Mol	M.musculus	27oct16_31aug16_MSM_m1_sp1_21_rev.tif_Batch1
Batch1		27oct16_31aug16_MSM_m1_sp1_4_rev.tif	3564-11689-5544.tif	2	20	24	no	y	0	0	27oct16_31aug16_MSM_m1_sp1_4_rev.tif	31aug16_MSM_m1	MSM male	MSM	male	Mol	M.musculus	27oct16_31aug16_MSM_m1_sp1_4_rev.tif_Batch1
Batch1		27oct16_31aug16_MSM_m1_sp1_8_rev.tif	31268-16831-18916.tif	2	20	27	no	y	1	0	27oct16_31aug16_MSM_m1_sp1_8_rev.tif	31aug16_MSM_m1	MSM male	MSM	male	Mol	M.musculus	27oct16_31aug16_MSM_m1_sp1_8_rev.tif_Batch1
Batch1		27oct16_31aug16_MSM_m1_sp1_9_rev.tif	31811-3503-1284.tif	2	20	30	no	y	0	0	27oct16_31aug16_MSM_m1_sp1_9_rev.tif	31aug16_MSM_m1	MSM male	MSM	male	Mol	M.musculus	27oct16_31aug16_MSM_m1_sp1_9_rev.tif_Batch1
Batch1		27oct16_31aug16_MSM_m1_sp1_15.4_rev.tif	17007-9083-31823.tif	2	20	30	yes	yes			27oct16_31aug16_MSM_m1_sp1_15.4_rev.tif	31aug16_MSM_m1	MSM male	MSM	male	Mol	M.musculus	27oct16_31aug16_MSM_m1_sp1_15.4_rev.tif_Batch1
Batch3		29nov16_13nov16_MSM_m2_sp1_16_rev.tif	6834-7453-30407.tif	2	20	34		y	0	0	29nov16_13nov16_MSM_m2_sp1_16_rev.tif	13nov16_MSM_m2	MSM male	MSM	male	Mol	M.musculus	29nov16_13nov16_MSM_m2_sp1_16_rev.tif_Batch3
Batch3		29nov16_13nov16_MSM_m2_sp1_18_rev.tif	26509-19083-30949.tif	2	20	27		no	1	1	29nov16_13nov16_MSM_m2_sp1_18_rev.tif	13nov16_MSM_m2	MSM male	MSM	male	Mol	M.musculus	29nov16_13nov16_MSM_m2_sp1_18_rev.tif_Batch3
Batch3		29nov16_13nov16_MSM_m2_sp1_25_rev.tif	26353-18796-19669.tif	2	20	32		yes	0	0	29nov16_13nov16_MSM_m2_sp1_25_rev.tif	13nov16_MSM_m2	MSM male	MSM	male	Mol	M.musculus	29nov16_13nov16_MSM_m2_sp1_25_rev.tif_Batch3
Batch3		30nov16_13nov16_MSM_m1_sp1_12_rev.tif	1255-19103-718.tif	2	20	32		y	0	0	30nov16_13nov16_MSM_m1_sp1_12_rev.tif	13nov16_MSM_m1	MSM male	MSM	male	Mol	M.musculus	30nov16_13nov16_MSM_m1_sp1_12_rev.tif_Batch3
Batch3		30nov16_13nov16_MSM_m1_sp1_14.1_rev.tif	3493-1005-15115.tif	2	20	28		yes	0	0	30nov16_13nov16_MSM_m1_sp1_14.1_rev.tif	13nov16_MSM_m1	MSM male	MSM	male	Mol	M.musculus	30nov16_13nov16_MSM_m1_sp1_14.1_rev.tif_Batch3
Batch3		30nov16_13nov16_MSM_m1_sp1_16_rev.tif	16150-17356-26126.tif	2	20	31	yes	y	0	0	30nov16_13nov16_MSM_m1_sp1_16_rev.tif	13nov16_MSM_m1	MSM male	MSM	male	Mol	M.musculus	30nov16_13nov16_MSM_m1_sp1_16_rev.tif_Batch3
Batch3		30nov16_13nov16_MSM_m1_sp1_18_rev.tif	161-12279-8836.tif	2	20	32		y	0	0	30nov16_13nov16_MSM_m1_sp1_18_rev.tif	13nov16_MSM_m1	MSM male	MSM	male	Mol	M.musculus	30nov16_13nov16_MSM_m1_sp1_18_rev.tif_Batch3
Batch3		30nov16_13nov16_MSM_m1_sp1_2_rev.tif	24000-9022-7185.tif	2	20	36			0	0	30nov16_13nov16_MSM_m1_sp1_2_rev.tif	13nov16_MSM_m1	MSM male	MSM	male	Mol	M.musculus	30nov16_13nov16_MSM_m1_sp1_2_rev.tif_Batch3
Batch3		30nov16_13nov16_MSM_m1_sp1_24_rev.tif	18893-4339-12257.tif	2	20	30		y	0	0	30nov16_13nov16_MSM_m1_sp1_24_rev.tif	13nov16_MSM_m1	MSM male	MSM	male	Mol	M.musculus	30nov16_13nov16_MSM_m1_sp1_24_rev.tif_Batch3
Batch3		30nov16_13nov16_MSM_m1_sp1_29.2_rev.tif	1844-24401-21635.tif	2	20	30		y	0	0	30nov16_13nov16_MSM_m1_sp1_29.2_rev.tif	13nov16_MSM_m1	MSM male	MSM	male	Mol	M.musculus	30nov16_13nov16_MSM_m1_sp1_29.2_rev.tif_Batch3
Batch3		30nov16_13nov16_MSM_m1_sp1_30.1_rev.tif	665-6937-6452.tif	2	20	34		y	0	0	30nov16_13nov16_MSM_m1_sp1_30.1_rev.tif	13nov16_MSM_m1	MSM male	MSM	male	Mol	M.musculus	30nov16_13nov16_MSM_m1_sp1_30.1_rev.tif_Batch3
Batch3		30nov16_13nov16_MSM_m1_sp1_6.1_rev.tif	11858-24724-31840.tif	2	20	32		y	0	0	30nov16_13nov16_MSM_m1_sp1_6.1_rev.tif	13nov16_MSM_m1	MSM male	MSM	male	Mol	M.musculus	30nov16_13nov16_MSM_m1_sp1_6.1_rev.tif_Batch3
Batch3		30nov16_13nov16_MSM_m1_sp1_8_rev.tif	32525-21695-8378.tif	2	20	34		y	0	0	30nov16_13nov16_MSM_m1_sp1_8_rev.tif	13nov16_MSM_m1	MSM male	MSM	male	Mol	M.musculus	30nov16_13nov16_MSM_m1_sp1_8_rev.tif_Batch3
Batch6		16aug17_5jul17_MSM_m1_sp1_23_rev.tif	30186-21296-26667.tif	2	20	24	no		1	0	16aug17_5jul17_MSM_m1_sp1_23_rev.tif	5jul17_MSM_m1	MSM male	MSM	male	Mol	M.musculus	16aug17_5jul17_MSM_m1_sp1_23_rev.tif_Batch6
Batch6		16aug17_5jul17_MSM_m1_sp1_6.3_rev.tif	16546-24748-21774.tif	2	20	25	no		0	0	16aug17_5jul17_MSM_m1_sp1_6.3_rev.tif	5jul17_MSM_m1	MSM male	MSM	male	Mol	M.musculus	16aug17_5jul17_MSM_m1_sp1_6.3_rev.tif_Batch6
Batch6		3aug17_30may17_MSM_m1_sp1_27_rev.tif	9786-12722-26017.tif	2	20	26	yes		1	0	3aug17_30may17_MSM_m1_sp1_27_rev.tif	30may17_MSM_m1	MSM male	MSM	male	Mol	M.musculus	3aug17_30may17_MSM_m1_sp1_27_rev.tif_Batch6
Batch6		16aug17_5jul17_MSM_m1_sp1_6.1_rev.tif	10726-12892-30884.tif	2	20	27	no		0	0	16aug17_5jul17_MSM_m1_sp1_6.1_rev.tif	5jul17_MSM_m1	MSM male	MSM	male	Mol	M.musculus	16aug17_5jul17_MSM_m1_sp1_6.1_rev.tif_Batch6
Batch6		3aug17_30may17_MSM_m1_sp1_28_rev.tif	19908-13496-24630.tif	2	20	27	yes		0	0	3aug17_30may17_MSM_m1_sp1_28_rev.tif	30may17_MSM_m1	MSM male	MSM	male	Mol	M.musculus	3aug17_30may17_MSM_m1_sp1_28_rev.tif_Batch6
Batch6		16aug17_5jul17_MSM_m1_sp1_26_rev.tif	1799-9338-25536.tif	2	20	28	no		0	0	16aug17_5jul17_MSM_m1_sp1_26_rev.tif	5jul17_MSM_m1	MSM male	MSM	male	Mol	M.musculus	16aug17_5jul17_MSM_m1_sp1_26_rev.tif_Batch6
Batch6		3aug17_30may17_MSM_m1_sp1_6_rev.tif	18831-2487-30825.tif	2	20	29	no		0	0	3aug17_30may17_MSM_m1_sp1_6_rev.tif	30may17_MSM_m1	MSM male	MSM	male	Mol	M.musculus	3aug17_30may17_MSM_m1_sp1_6_rev.tif_Batch6
Batch6		3aug17_30may17_MSM_m1_sp1_33_rev.tif	12855-11138-26106.tif	2	20	30	no		0	0	3aug17_30may17_MSM_m1_sp1_33_rev.tif	30may17_MSM_m1	MSM male	MSM	male	Mol	M.musculus	3aug17_30may17_MSM_m1_sp1_33_rev.tif_Batch6
Batch6		16aug17_5jul17_MSM_m1_sp1_29_rev.tif	13406-20092-12542.tif	2	20	30	no		0	0	16aug17_5jul17_MSM_m1_sp1_29_rev.tif	5jul17_MSM_m1	MSM male	MSM	male	Mol	M.musculus	16aug17_5jul17_MSM_m1_sp1_29_rev.tif_Batch6
Batch6		16aug17_5jul17_MSM_m1_sp1_15_rev.tif	14085-20497-8896.tif	2	20	31	no		0	0	16aug17_5jul17_MSM_m1_sp1_15_rev.tif	5jul17_MSM_m1	MSM male	MSM	male	Mol	M.musculus	16aug17_5jul17_MSM_m1_sp1_15_rev.tif_Batch6
Batch6		3aug17_30may17_MSM_m1_sp1_32_rev.tif	1471-3735-4067.tif	2	20	31	yes		0	0	3aug17_30may17_MSM_m1_sp1_32_rev.tif	30may17_MSM_m1	MSM male	MSM	male	Mol	M.musculus	3aug17_30may17_MSM_m1_sp1_32_rev.tif_Batch6
Batch6		16aug17_5jul17_MSM_m1_sp1_27_rev.tif	3585-2612-19238.tif	2	20	34	no		0	0	16aug17_5jul17_MSM_m1_sp1_27_rev.tif	5jul17_MSM_m1	MSM male	MSM	male	Mol	M.musculus	16aug17_5jul17_MSM_m1_sp1_27_rev.tif_Batch6
Batch9		11feb18_1feb18_MSM_m1_sp1_16.3_rev.tif	12401-23219-15825.tif	2	20	30	no	yes	1	0	11feb18_1feb18_MSM_m1_sp1_16.3_rev.tif	1feb18_MSM_m1	MSM male	MSM	male	Mol	M.musculus	11feb18_1feb18_MSM_m1_sp1_16.3_rev.tif_Batch9
Batch9		11feb18_1feb18_MSM_m1_sp1_4_rev.tif	1424-18414-22930.tif	2	20	36	no	yes	0	0	11feb18_1feb18_MSM_m1_sp1_4_rev.tif	1feb18_MSM_m1	MSM male	MSM	male	Mol	M.musculus	11feb18_1feb18_MSM_m1_sp1_4_rev.tif_Batch9
Batch9		11feb18_1feb18_MSM_m1_sp1_20_rev.tif	15383-12921-22532.tif	2	20	33	no	yes	0	0	11feb18_1feb18_MSM_m1_sp1_20_rev.tif	1feb18_MSM_m1	MSM male	MSM	male	Mol	M.musculus	11feb18_1feb18_MSM_m1_sp1_20_rev.tif_Batch9
Batch9		11feb18_1feb18_MSM_m1_sp1_2.2_rev.tif	16475-15525-8966.tif	2	20	30	no	yes	0	0	11feb18_1feb18_MSM_m1_sp1_2.2_rev.tif	1feb18_MSM_m1	MSM male	MSM	male	Mol	M.musculus	11feb18_1feb18_MSM_m1_sp1_2.2_rev.tif_Batch9
Batch9		11feb18_1feb18_MSM_m1_sp1_5.1_rev.tif	21464-27428-6107.tif	2	20	32	no	yes	0	0	11feb18_1feb18_MSM_m1_sp1_5.1_rev.tif	1feb18_MSM_m1	MSM male	MSM	male	Mol	M.musculus	11feb18_1feb18_MSM_m1_sp1_5.1_rev.tif_Batch9
Batch9		11feb18_1feb18_MSM_m1_sp1_2.1_rev.tif	2169-32299-32388.tif	2	20	29	no	yes	0	0	11feb18_1feb18_MSM_m1_sp1_2.1_rev.tif	1feb18_MSM_m1	MSM male	MSM	male	Mol	M.musculus	11feb18_1feb18_MSM_m1_sp1_2.1_rev.tif_Batch9
Batch9		11feb18_1feb18_MSM_m1_sp1_11_rev.tif	23302-2098-30388.tif	2	20	31	no	yes	0	0	11feb18_1feb18_MSM_m1_sp1_11_rev.tif	1feb18_MSM_m1	MSM male	MSM	male	Mol	M.musculus	11feb18_1feb18_MSM_m1_sp1_11_rev.tif_Batch9
Batch9		11feb18_1feb18_MSM_m1_sp1_15_rev.tif	25234-30463-300.tif	2	20	31	no	yes	1	0	11feb18_1feb18_MSM_m1_sp1_15_rev.tif	1feb18_MSM_m1	MSM male	MSM	male	Mol	M.musculus	11feb18_1feb18_MSM_m1_sp1_15_rev.tif_Batch9
Batch9		11feb18_1feb18_MSM_m1_sp1_9_rev.tif	26246-20120-22944.tif	2	20	32	no	yes	0	0	11feb18_1feb18_MSM_m1_sp1_9_rev.tif	1feb18_MSM_m1	MSM male	MSM	male	Mol	M.musculus	11feb18_1feb18_MSM_m1_sp1_9_rev.tif_Batch9
Batch9		11feb18_1feb18_MSM_m1_sp1_19_rev.tif	26391-5833-16482.tif	2	20	32	no	yes	0	0	11feb18_1feb18_MSM_m1_sp1_19_rev.tif	1feb18_MSM_m1	MSM male	MSM	male	Mol	M.musculus	11feb18_1feb18_MSM_m1_sp1_19_rev.tif_Batch9
Batch9		11feb18_1feb18_MSM_m1_sp1_13.3_rev.tif	30445-16375-16716.tif	2	20	30	no	yes	0	0	11feb18_1feb18_MSM_m1_sp1_13.3_rev.tif	1feb18_MSM_m1	MSM male	MSM	male	Mol	M.musculus	11feb18_1feb18_MSM_m1_sp1_13.3_rev.tif_Batch9
Batch9		11feb18_1feb18_MSM_m1_sp1_7_rev.tif	30988-28540-9135.tif	2	20	31	no	yes	0	0	11feb18_1feb18_MSM_m1_sp1_7_rev.tif	1feb18_MSM_m1	MSM male	MSM	male	Mol	M.musculus	11feb18_1feb18_MSM_m1_sp1_7_rev.tif_Batch9
Batch9		11feb18_1feb18_MSM_m1_sp1_16.2_rev.tif	7747-5417-13012.tif	2	20	32	no	yes	0	0	11feb18_1feb18_MSM_m1_sp1_16.2_rev.tif	1feb18_MSM_m1	MSM male	MSM	male	Mol	M.musculus	11feb18_1feb18_MSM_m1_sp1_16.2_rev.tif_Batch9
Batch9		11feb18_1feb18_MSM_m1_sp1_12.1_rev.tif	781-26774-8625.tif	2	20	29	no	yes	1	0	11feb18_1feb18_MSM_m1_sp1_12.1_rev.tif	1feb18_MSM_m1	MSM male	MSM	male	Mol	M.musculus	11feb18_1feb18_MSM_m1_sp1_12.1_rev.tif_Batch9
Batch9		11feb18_1feb18_MSM_m1_sp1_6_rev.tif	8538-31274-2000.tif	2	20	28	no	yes	0	0	11feb18_1feb18_MSM_m1_sp1_6_rev.tif	1feb18_MSM_m1	MSM male	MSM	male	Mol	M.musculus	11feb18_1feb18_MSM_m1_sp1_6_rev.tif_Batch9
Batch18		14oct19_4feb19_MSM_m1_sp2_13.1_rev.tif	23059-10136-6025.tif	2	20	32	no	yes	0	0	14oct19_4feb19_MSM_m1_sp2_13.1_rev.tif	4feb19_MSM_m1	MSM male	MSM	male	Mol	M.musculus	14oct19_4feb19_MSM_m1_sp2_13.1_rev.tif_Batch18
Batch18		14oct19_4feb19_MSM_m1_sp2_15_rev.tif	31479-11955-10433.tif	2	20	31	no	yes	0	0	14oct19_4feb19_MSM_m1_sp2_15_rev.tif	4feb19_MSM_m1	MSM male	MSM	male	Mol	M.musculus	14oct19_4feb19_MSM_m1_sp2_15_rev.tif_Batch18
Batch18		14oct19_4feb19_MSM_m1_sp2_19_rev.tif	13364-12593-9579.tif	2	20	30	no	yes	0	0	14oct19_4feb19_MSM_m1_sp2_19_rev.tif	4feb19_MSM_m1	MSM male	MSM	male	Mol	M.musculus	14oct19_4feb19_MSM_m1_sp2_19_rev.tif_Batch18
Batch18		14oct19_4feb19_MSM_m1_sp2_2.1_rev.tif	25565-274-25092.tif	2	20	36	no	yes	0	0	14oct19_4feb19_MSM_m1_sp2_2.1_rev.tif	4feb19_MSM_m1	MSM male	MSM	male	Mol	M.musculus	14oct19_4feb19_MSM_m1_sp2_2.1_rev.tif_Batch18
Batch18		14oct19_4feb19_MSM_m1_sp2_21_rev.tif	9712-24359-13516.tif	2	20	32	no	no	0	0	14oct19_4feb19_MSM_m1_sp2_21_rev.tif	4feb19_MSM_m1	MSM male	MSM	male	Mol	M.musculus	14oct19_4feb19_MSM_m1_sp2_21_rev.tif_Batch18
Batch18		14oct19_4feb19_MSM_m1_sp2_27.1_rev.tif	28363-12681-14415.tif	2	20	31	no	yes	0	0	14oct19_4feb19_MSM_m1_sp2_27.1_rev.tif	4feb19_MSM_m1	MSM male	MSM	male	Mol	M.musculus	14oct19_4feb19_MSM_m1_sp2_27.1_rev.tif_Batch18
Batch18		14oct19_4feb19_MSM_m1_sp2_27.2_rev.tif	686-25707-9689.tif	2	20	31	no	yes	0	0	14oct19_4feb19_MSM_m1_sp2_27.2_rev.tif	4feb19_MSM_m1	MSM male	MSM	male	Mol	M.musculus	14oct19_4feb19_MSM_m1_sp2_27.2_rev.tif_Batch18
Batch18		14oct19_4feb19_MSM_m1_sp2_29_rev.tif	23913-30681-3493.tif	2	20	31	no	yes	0	0	14oct19_4feb19_MSM_m1_sp2_29_rev.tif	4feb19_MSM_m1	MSM male	MSM	male	Mol	M.musculus	14oct19_4feb19_MSM_m1_sp2_29_rev.tif_Batch18
Batch18		14oct19_4feb19_MSM_m1_sp2_33.1_rev.tif	28570-22818-5361.tif	2	20	33	no	yes	0	0	14oct19_4feb19_MSM_m1_sp2_33.1_rev.tif	4feb19_MSM_m1	MSM male	MSM	male	Mol	M.musculus	14oct19_4feb19_MSM_m1_sp2_33.1_rev.tif_Batch18
Batch18		14oct19_4feb19_MSM_m1_sp2_37_rev.tif	15236-28159-3593.tif	2	20	32	no	yes	0	0	14oct19_4feb19_MSM_m1_sp2_37_rev.tif	4feb19_MSM_m1	MSM male	MSM	male	Mol	M.musculus	14oct19_4feb19_MSM_m1_sp2_37_rev.tif_Batch18
Batch18		14oct19_4feb19_MSM_m1_sp2_38_rev.tif	1831-20746-20697.tif	2	20	32	no	yes	0	0	14oct19_4feb19_MSM_m1_sp2_38_rev.tif	4feb19_MSM_m1	MSM male	MSM	male	Mol	M.musculus	14oct19_4feb19_MSM_m1_sp2_38_rev.tif_Batch18
Batch18		14oct19_4feb19_MSM_m1_sp2_43.1_rev.tif	24085-2437-19307.tif	2	20	31	no	yes	0	0	14oct19_4feb19_MSM_m1_sp2_43.1_rev.tif	4feb19_MSM_m1	MSM male	MSM	male	Mol	M.musculus	14oct19_4feb19_MSM_m1_sp2_43.1_rev.tif_Batch18
Batch18		14oct19_4feb19_MSM_m1_sp2_44.1_rev.tif	12354-30834-9766.tif	2	20	33	no	yes	0	0	14oct19_4feb19_MSM_m1_sp2_44.1_rev.tif	4feb19_MSM_m1	MSM male	MSM	male	Mol	M.musculus	14oct19_4feb19_MSM_m1_sp2_44.1_rev.tif_Batch18
Batch18		14oct19_4feb19_MSM_m1_sp2_46.1_rev.tif	29079-9054-5508.tif	2	20	33	no	yes	0	0	14oct19_4feb19_MSM_m1_sp2_46.1_rev.tif	4feb19_MSM_m1	MSM male	MSM	male	Mol	M.musculus	14oct19_4feb19_MSM_m1_sp2_46.1_rev.tif_Batch18
Batch18		14oct19_4feb19_MSM_m1_sp2_8.1_rev.tif	20587-19670-18000.tif	2	20	31	no	yes	1	0	14oct19_4feb19_MSM_m1_sp2_8.1_rev.tif	4feb19_MSM_m1	MSM male	MSM	male	Mol	M.musculus	14oct19_4feb19_MSM_m1_sp2_8.1_rev.tif_Batch18
Batch11		22jun18_24aug17_PERC_m1_sp1_16_rev.tif	10480-29062-27858.tif	2	20	20	no	yes	1	0	22jun18_24aug17_PERC_m1_sp1_16_rev.tif	24aug17_PERC_m1	PERC male	PERC	male	Dom	M.musculus	22jun18_24aug17_PERC_m1_sp1_16_rev.tif_Batch11
Batch11		22jun18_24aug17_PERC_m1_sp1_5.2_rev.tif	5742-7441-19105.tif	2	20	21	no	yes	1	0	22jun18_24aug17_PERC_m1_sp1_5.2_rev.tif	24aug17_PERC_m1	PERC male	PERC	male	Dom	M.musculus	22jun18_24aug17_PERC_m1_sp1_5.2_rev.tif_Batch11
Batch11		22jun18_24aug17_PERC_m1_sp1_31_rev.tif	25266-1460-13967.tif	2	20	22	no	yes	1	0	22jun18_24aug17_PERC_m1_sp1_31_rev.tif	24aug17_PERC_m1	PERC male	PERC	male	Dom	M.musculus	22jun18_24aug17_PERC_m1_sp1_31_rev.tif_Batch11
Batch11		22jun18_24aug17_PERC_m1_sp1_17.2_rev.tif	11824-31481-16325.tif	2	20	22	no	yes	0	0	22jun18_24aug17_PERC_m1_sp1_17.2_rev.tif	24aug17_PERC_m1	PERC male	PERC	male	Dom	M.musculus	22jun18_24aug17_PERC_m1_sp1_17.2_rev.tif_Batch11
Batch11		22jun18_24aug17_PERC_m1_sp1_15_rev.tif	19216-28159-18000.tif	2	20	22	no	yes	1	0	22jun18_24aug17_PERC_m1_sp1_15_rev.tif	24aug17_PERC_m1	PERC male	PERC	male	Dom	M.musculus	22jun18_24aug17_PERC_m1_sp1_15_rev.tif_Batch11
Batch11		22jun18_24aug17_PERC_m1_sp1_27.1_rev.tif	20882-19419-10035.tif	2	20	23	no	yes	2	0	22jun18_24aug17_PERC_m1_sp1_27.1_rev.tif	24aug17_PERC_m1	PERC male	PERC	male	Dom	M.musculus	22jun18_24aug17_PERC_m1_sp1_27.1_rev.tif_Batch11
Batch11		22jun18_24aug17_PERC_m1_sp1_29_rev.tif	3230-25492-14731.tif	2	20	23	no	yes	0	0	22jun18_24aug17_PERC_m1_sp1_29_rev.tif	24aug17_PERC_m1	PERC male	PERC	male	Dom	M.musculus	22jun18_24aug17_PERC_m1_sp1_29_rev.tif_Batch11
Batch11		22jun18_24aug17_PERC_m1_sp1_14.1_rev.tif	14547-8411-26854.tif	2	20	23	no	yes	1	0	22jun18_24aug17_PERC_m1_sp1_14.1_rev.tif	24aug17_PERC_m1	PERC male	PERC	male	Dom	M.musculus	22jun18_24aug17_PERC_m1_sp1_14.1_rev.tif_Batch11
Batch11		22jun18_24aug17_PERC_m1_sp1_14.2_rev.tif	209-22427-27528.tif	2	20	23	no	yes	2	0	22jun18_24aug17_PERC_m1_sp1_14.2_rev.tif	24aug17_PERC_m1	PERC male	PERC	male	Dom	M.musculus	22jun18_24aug17_PERC_m1_sp1_14.2_rev.tif_Batch11
Batch11		22jun18_24aug17_PERC_m1_sp1_11_rev.tif	9391-17158-6014.tif	2	20	23	yes	yes	0	0	22jun18_24aug17_PERC_m1_sp1_11_rev.tif	24aug17_PERC_m1	PERC male	PERC	male	Dom	M.musculus	22jun18_24aug17_PERC_m1_sp1_11_rev.tif_Batch11
Batch11		22jun18_24aug17_PERC_m1_sp1_19.2_rev.tif	23919-8180-27734.tif	2	20	24	no	yes	0	0	22jun18_24aug17_PERC_m1_sp1_19.2_rev.tif	24aug17_PERC_m1	PERC male	PERC	male	Dom	M.musculus	22jun18_24aug17_PERC_m1_sp1_19.2_rev.tif_Batch11
Batch11		22jun18_24aug17_PERC_m1_sp1_27.3_rev.tif	13454-31401-3040.tif	2	20	24	yes	yes	1	1	22jun18_24aug17_PERC_m1_sp1_27.3_rev.tif	24aug17_PERC_m1	PERC male	PERC	male	Dom	M.musculus	22jun18_24aug17_PERC_m1_sp1_27.3_rev.tif_Batch11
Batch11		22jun18_24aug17_PERC_m1_sp1_30.1_rev.tif	19215-12412-30136.tif	2	20	26	no	yes	0	0	22jun18_24aug17_PERC_m1_sp1_30.1_rev.tif	24aug17_PERC_m1	PERC male	PERC	male	Dom	M.musculus	22jun18_24aug17_PERC_m1_sp1_30.1_rev.tif_Batch11
Batch0		6may15_17apr15_PWD_f1_sp1_12_rev.tif	25391-25385-3293.tif	2	20	26	no	na	0	0	6may15_17apr15_PWD_f1_sp1_12_rev.tif	17apr15_PWD_f1	PWD female	PWD	female	Musc	M.musculus	6may15_17apr15_PWD_f1_sp1_12_rev.tif_Batch0
Batch0		6may15_17apr15_PWD_f1_sp1_13_rev.tif	18249-5148-4433.tif	2	20	29	no	na	0	0	6may15_17apr15_PWD_f1_sp1_13_rev.tif	17apr15_PWD_f1	PWD female	PWD	female	Musc	M.musculus	6may15_17apr15_PWD_f1_sp1_13_rev.tif_Batch0
Batch0		6may15_17apr15_PWD_f1_sp1_6_rev.tif	31933-4565-3630.tif	2	20	31	no	na	0	0	6may15_17apr15_PWD_f1_sp1_6_rev.tif	17apr15_PWD_f1	PWD female	PWD	female	Musc	M.musculus	6may15_17apr15_PWD_f1_sp1_6_rev.tif_Batch0
Batch0		9aug15_17apr15_PWD_f2_sp1_18.1_rev.tif	21569-21293-1912.tif	2	20	27	no	na	0	0	9aug15_17apr15_PWD_f2_sp1_18.1_rev.tif	17apr15_PWD_f2	PWD female	PWD	female	Musc	M.musculus	9aug15_17apr15_PWD_f2_sp1_18.1_rev.tif_Batch0
Batch0		20may15_17apr15_PWD_f4_sp1_19_rev.tif	24797-10298-32213.tif	2	20	31	no	na	0	0	20may15_17apr15_PWD_f4_sp1_19_rev.tif	17apr15_PWD_f4	PWD female	PWD	female	Musc	M.musculus	20may15_17apr15_PWD_f4_sp1_19_rev.tif_Batch0
Batch0		20may15_17apr15_PWD_f4_sp1_25_rev.tif	2567-23401-101.tif	2	20	26	no	na	0	0	20may15_17apr15_PWD_f4_sp1_25_rev.tif	17apr15_PWD_f4	PWD female	PWD	female	Musc	M.musculus	20may15_17apr15_PWD_f4_sp1_25_rev.tif_Batch0
Batch0		20may15_17apr15_PWD_f4_sp1_4_rev.tif	31790-21090-6020.tif	2	20	33	no	na	0	0	20may15_17apr15_PWD_f4_sp1_4_rev.tif	17apr15_PWD_f4	PWD female	PWD	female	Musc	M.musculus	20may15_17apr15_PWD_f4_sp1_4_rev.tif_Batch0
Batch0		9aug15_23apr15_PWD_f2_sp1_1_rev.tif	30648-27366-28887.tif	2	20	28	no	na	0	0	9aug15_23apr15_PWD_f2_sp1_1_rev.tif	23apr15_PWD_f2	PWD female	PWD	female	Musc	M.musculus	9aug15_23apr15_PWD_f2_sp1_1_rev.tif_Batch0
Batch0		8jun15_23apr15_PWD_f2_sp1_12_rev.tif	28147-14742-20150.tif	2	20	29	no	na	0	0	8jun15_23apr15_PWD_f2_sp1_12_rev.tif	23apr15_PWD_f2	PWD female	PWD	female	Musc	M.musculus	8jun15_23apr15_PWD_f2_sp1_12_rev.tif_Batch0
Batch0		8jun15_23apr15_PWD_f2_sp1_25.1_rev.tif	27206-9142-13944.tif	2	20	23	no	na	0	0	8jun15_23apr15_PWD_f2_sp1_25.1_rev.tif	23apr15_PWD_f2	PWD female	PWD	female	Musc	M.musculus	8jun15_23apr15_PWD_f2_sp1_25.1_rev.tif_Batch0
Batch0		13mar15_28feb15_PWD_f2_sp1_22.1_rev.tif	20695-14131-3489.tif	2	20	27	yes	na	0	0	13mar15_28feb15_PWD_f2_sp1_22.1_rev.tif	28feb15_PWD_f2	PWD female	PWD	female	Musc	M.musculus	13mar15_28feb15_PWD_f2_sp1_22.1_rev.tif_Batch0
Batch0		13mar15_28feb15_PWD_f2_sp1_29_rev.tif	27422-23029-3021.tif	2	20	25	yes	na	0	0	13mar15_28feb15_PWD_f2_sp1_29_rev.tif	28feb15_PWD_f2	PWD female	PWD	female	Musc	M.musculus	13mar15_28feb15_PWD_f2_sp1_29_rev.tif_Batch0
Batch0		13mar15_28feb15_PWD_f2_sp1_30_rev.tif	29470-7891-11822.tif	2	20	26	no	na	0	0	13mar15_28feb15_PWD_f2_sp1_30_rev.tif	28feb15_PWD_f2	PWD female	PWD	female	Musc	M.musculus	13mar15_28feb15_PWD_f2_sp1_30_rev.tif_Batch0
Batch0		13mar15_28feb15_PWD_f2_sp1_33.2_rev.tif	26167-10842-9547.tif	2	20	25	no	na	0	0	13mar15_28feb15_PWD_f2_sp1_33.2_rev.tif	28feb15_PWD_f2	PWD female	PWD	female	Musc	M.musculus	13mar15_28feb15_PWD_f2_sp1_33.2_rev.tif_Batch0
Batch0		13mar15_28feb15_PWD_f2_sp1_35.1_rev.tif	19471-12867-9883.tif	2	20	31	no	na	0	0	13mar15_28feb15_PWD_f2_sp1_35.1_rev.tif	28feb15_PWD_f2	PWD female	PWD	female	Musc	M.musculus	13mar15_28feb15_PWD_f2_sp1_35.1_rev.tif_Batch0
Batch0		13mar15_28feb15_PWD_f2_sp1_39_rev.tif	5572-14487-3941.tif	2	20	24	no	na	0	0	13mar15_28feb15_PWD_f2_sp1_39_rev.tif	28feb15_PWD_f2	PWD female	PWD	female	Musc	M.musculus	13mar15_28feb15_PWD_f2_sp1_39_rev.tif_Batch0
Batch0		13mar15_28feb15_PWD_f2_sp1_40.1_rev.tif	22554-13777-22426.tif	2	20	24	no		0	0	13mar15_28feb15_PWD_f2_sp1_40.1_rev.tif	28feb15_PWD_f2	PWD female	PWD	female	Musc	M.musculus	13mar15_28feb15_PWD_f2_sp1_40.1_rev.tif_Batch0
Batch0		13mar15_28feb15_PWD_f2_sp1_42_rev.tif	23076-4295-4168.tif	2	20	26	no	na	0	0	13mar15_28feb15_PWD_f2_sp1_42_rev.tif	28feb15_PWD_f2	PWD female	PWD	female	Musc	M.musculus	13mar15_28feb15_PWD_f2_sp1_42_rev.tif_Batch0
Batch0		13mar15_28feb15_PWD_f2_sp1_43_rev.tif	19702-13580-29530.tif	2	20	24	no	na	0	0	13mar15_28feb15_PWD_f2_sp1_43_rev.tif	28feb15_PWD_f2	PWD female	PWD	female	Musc	M.musculus	13mar15_28feb15_PWD_f2_sp1_43_rev.tif_Batch0
Batch0		13mar15_28feb15_PWD_f2_sp1_48.1_rev.tif	23584-9754-1083.tif	2	20	26	no	na	0	0	13mar15_28feb15_PWD_f2_sp1_48.1_rev.tif	28feb15_PWD_f2	PWD female	PWD	female	Musc	M.musculus	13mar15_28feb15_PWD_f2_sp1_48.1_rev.tif_Batch0
Batch0		13mar15_28feb15_PWD_f2_sp1_6_rev.tif	22818-9011-23122.tif	2	20	24	yes	na	0	0	13mar15_28feb15_PWD_f2_sp1_6_rev.tif	28feb15_PWD_f2	PWD female	PWD	female	Musc	M.musculus	13mar15_28feb15_PWD_f2_sp1_6_rev.tif_Batch0
Batch0		2apr15_28feb15_PWD_f3_sp1_10_rev.tif	28088-1533-22832.tif	2	20	29	no	na	0	0	2apr15_28feb15_PWD_f3_sp1_10_rev.tif	28feb15_PWD_f3	PWD female	PWD	female	Musc	M.musculus	2apr15_28feb15_PWD_f3_sp1_10_rev.tif_Batch0
Batch0		11mar15_28feb15_PWD_f3_sp1_17_rev.tif	6740-7971-23729.tif	2	20	30	no	na	0	0	11mar15_28feb15_PWD_f3_sp1_17_rev.tif	28feb15_PWD_f3	PWD female	PWD	female	Musc	M.musculus	11mar15_28feb15_PWD_f3_sp1_17_rev.tif_Batch0
Batch0		11mar15_28feb15_PWD_f3_sp1_23_rev.tif	14949-12931-57.tif	2	20	25	yes	na	0	0	11mar15_28feb15_PWD_f3_sp1_23_rev.tif	28feb15_PWD_f3	PWD female	PWD	female	Musc	M.musculus	11mar15_28feb15_PWD_f3_sp1_23_rev.tif_Batch0
Batch0		11mar15_28feb15_PWD_f3_sp1_26.1_rev.tif	17890-17166-23806.tif	2	20	31	no	na	0	0	11mar15_28feb15_PWD_f3_sp1_26.1_rev.tif	28feb15_PWD_f3	PWD female	PWD	female	Musc	M.musculus	11mar15_28feb15_PWD_f3_sp1_26.1_rev.tif_Batch0
Batch0		2apr15_28feb15_PWD_f3_sp1_6_rev.tif	31985-30356-7445.tif	2	20	24	no	na	0	0	2apr15_28feb15_PWD_f3_sp1_6_rev.tif	28feb15_PWD_f3	PWD female	PWD	female	Musc	M.musculus	2apr15_28feb15_PWD_f3_sp1_6_rev.tif_Batch0
Batch0		2apr15_28feb15_PWD_f3_sp1_8_rev.tif	2780-30903-17637.tif	2	20	36	no	na	0	0	2apr15_28feb15_PWD_f3_sp1_8_rev.tif	28feb15_PWD_f3	PWD female	PWD	female	Musc	M.musculus	2apr15_28feb15_PWD_f3_sp1_8_rev.tif_Batch0
Batch0		11mar15_28feb15_PWD_f6_sp1_10_rev.tif	27620-18031-17434.tif	2	20	24	yes	na	0	0	11mar15_28feb15_PWD_f6_sp1_10_rev.tif	28feb15_PWD_f6	PWD female	PWD	female	Musc	M.musculus	11mar15_28feb15_PWD_f6_sp1_10_rev.tif_Batch0
Batch0		11mar15_28feb15_PWD_f6_sp1_15_rev.tif	24041-30751-24114.tif	2	20	32	no	na	0	0	11mar15_28feb15_PWD_f6_sp1_15_rev.tif	28feb15_PWD_f6	PWD female	PWD	female	Musc	M.musculus	11mar15_28feb15_PWD_f6_sp1_15_rev.tif_Batch0
Batch0		11mar15_28feb15_PWD_f6_sp1_19.1_rev.tif	30431-27343-13512.tif	2	20	28	no	na	0	0	11mar15_28feb15_PWD_f6_sp1_19.1_rev.tif	28feb15_PWD_f6	PWD female	PWD	female	Musc	M.musculus	11mar15_28feb15_PWD_f6_sp1_19.1_rev.tif_Batch0
Batch0		11mar15_28feb15_PWD_f6_sp1_8.2_rev.tif	14314-1776-23820.tif	2	20	26	no	na	0	0	11mar15_28feb15_PWD_f6_sp1_8.2_rev.tif	28feb15_PWD_f6	PWD female	PWD	female	Musc	M.musculus	11mar15_28feb15_PWD_f6_sp1_8.2_rev.tif_Batch0
Batch0		2aug15_8oct14_PWD_f4_sp1_15_rev.tif	25554-11436-28914.tif	2	20	24	no	na	0	0	2aug15_8oct14_PWD_f4_sp1_15_rev.tif	8oct14_PWD_f4	PWD female	PWD	female	Musc	M.musculus	2aug15_8oct14_PWD_f4_sp1_15_rev.tif_Batch0
Batch0		29jun15_8oct14_PWD_f4_sp1_6_rev.tif	840-30024-22095.tif	2	20	29	no	na	0	0	29jun15_8oct14_PWD_f4_sp1_6_rev.tif	8oct14_PWD_f4	PWD female	PWD	female	Musc	M.musculus	29jun15_8oct14_PWD_f4_sp1_6_rev.tif_Batch0
Batch0		25feb15_8oct14_PWD_f8_sp1_13_rev.tif	21685-17998-3208.tif	2	20	26	no	na	0	0	25feb15_8oct14_PWD_f8_sp1_13_rev.tif	8oct14_PWD_f8	PWD female	PWD	female	Musc	M.musculus	25feb15_8oct14_PWD_f8_sp1_13_rev.tif_Batch0
Batch0		25feb15_8oct14_PWD_f8_sp1_14_rev.tif	23608-27582-20568.tif	2	20	28	no	no	0	0	25feb15_8oct14_PWD_f8_sp1_14_rev.tif	8oct14_PWD_f8	PWD female	PWD	female	Musc	M.musculus	25feb15_8oct14_PWD_f8_sp1_14_rev.tif_Batch0
Batch0		25feb15_8oct14_PWD_f8_sp1_15_rev.tif	31802-29175-20807.tif	2	20	26	no	na	0	0	25feb15_8oct14_PWD_f8_sp1_15_rev.tif	8oct14_PWD_f8	PWD female	PWD	female	Musc	M.musculus	25feb15_8oct14_PWD_f8_sp1_15_rev.tif_Batch0
Batch0		25feb15_8oct14_PWD_f8_sp1_19_rev.tif	15570-810-13334.tif	2	20	26	no	na	0	0	25feb15_8oct14_PWD_f8_sp1_19_rev.tif	8oct14_PWD_f8	PWD female	PWD	female	Musc	M.musculus	25feb15_8oct14_PWD_f8_sp1_19_rev.tif_Batch0
Batch0		25feb15_8oct14_PWD_f8_sp1_22_rev.tif	1409-26868-2966.tif	2	20	23	yes	na	0	0	25feb15_8oct14_PWD_f8_sp1_22_rev.tif	8oct14_PWD_f8	PWD female	PWD	female	Musc	M.musculus	25feb15_8oct14_PWD_f8_sp1_22_rev.tif_Batch0
Batch0		25feb15_8oct14_PWD_f8_sp1_5_rev.tif	26075-24131-12657.tif	2	20	24	no	na	0	0	25feb15_8oct14_PWD_f8_sp1_5_rev.tif	8oct14_PWD_f8	PWD female	PWD	female	Musc	M.musculus	25feb15_8oct14_PWD_f8_sp1_5_rev.tif_Batch0
Batch0		25feb15_8oct14_PWD_f8_sp1_8_rev.tif	20009-18587-24323.tif	2	20	33	no	na	0	0	25feb15_8oct14_PWD_f8_sp1_8_rev.tif	8oct14_PWD_f8	PWD female	PWD	female	Musc	M.musculus	25feb15_8oct14_PWD_f8_sp1_8_rev.tif_Batch0
Batch0		6may15_17apr15_PWD_f1_sp1_25_rev.tif	31475-30507-32447.tif	2	20	26	no	na	1	0	6may15_17apr15_PWD_f1_sp1_25_rev.tif	17apr15_PWD_f1	PWD female	PWD	female	Musc	M.musculus	6may15_17apr15_PWD_f1_sp1_25_rev.tif_Batch0
Batch0		11mar15_28feb15_PWD_f1_sp1_14.2_rev.tif	21110-23811-769.tif	2	20	21	no		1	0	11mar15_28feb15_PWD_f1_sp1_14.2_rev.tif	28feb15_PWD_f1	PWD female	PWD	female	Musc	M.musculus	11mar15_28feb15_PWD_f1_sp1_14.2_rev.tif_Batch0
Batch0		11mar15_28feb15_PWD_f1_sp1_2_rev.tif	26657-14636-11460.tif	2	20	20	no	na	1	0	11mar15_28feb15_PWD_f1_sp1_2_rev.tif	28feb15_PWD_f1	PWD female	PWD	female	Musc	M.musculus	11mar15_28feb15_PWD_f1_sp1_2_rev.tif_Batch0
Batch0		11mar15_28feb15_PWD_f1_sp1_5_rev.tif	4159-5048-1410.tif	2	20	20	no	na	1	0	11mar15_28feb15_PWD_f1_sp1_5_rev.tif	28feb15_PWD_f1	PWD female	PWD	female	Musc	M.musculus	11mar15_28feb15_PWD_f1_sp1_5_rev.tif_Batch0
Batch0		13mar15_28feb15_PWD_f2_sp1_10_rev.tif	9279-15901-14036.tif	2	20	29	no	na	1	0	13mar15_28feb15_PWD_f2_sp1_10_rev.tif	28feb15_PWD_f2	PWD female	PWD	female	Musc	M.musculus	13mar15_28feb15_PWD_f2_sp1_10_rev.tif_Batch0
Batch0		11mar15_28feb15_PWD_f3_sp1_25.1_rev.tif	24842-18502-11064.tif	2	20	23	no	na	1	0	11mar15_28feb15_PWD_f3_sp1_25.1_rev.tif	28feb15_PWD_f3	PWD female	PWD	female	Musc	M.musculus	11mar15_28feb15_PWD_f3_sp1_25.1_rev.tif_Batch0
Batch0		11mar15_28feb15_PWD_f6_sp1_9.2_rev.tif	9215-28359-12323.tif	2	20	24	yes	na	1	0	11mar15_28feb15_PWD_f6_sp1_9.2_rev.tif	28feb15_PWD_f6	PWD female	PWD	female	Musc	M.musculus	11mar15_28feb15_PWD_f6_sp1_9.2_rev.tif_Batch0
Batch0		6may15_17apr15_PWD_f1_sp1_7_rev.tif	7473-32561-6791.tif	2	20	30	no	na	2	0	6may15_17apr15_PWD_f1_sp1_7_rev.tif	17apr15_PWD_f1	PWD female	PWD	female	Musc	M.musculus	6may15_17apr15_PWD_f1_sp1_7_rev.tif_Batch0
Batch0		2aug15_8oct14_PWD_f4_sp1_10.1_rev.tif	22918-11375-22234.tif	2	20	22	no	na	3	0	2aug15_8oct14_PWD_f4_sp1_10.1_rev.tif	8oct14_PWD_f4	PWD female	PWD	female	Musc	M.musculus	2aug15_8oct14_PWD_f4_sp1_10.1_rev.tif_Batch0
Batch0		30jun15_17apr15_PWD_f3_sp1_18_rev.tif	22901-23479-3739.tif	2	20	27	no	na	0	1	30jun15_17apr15_PWD_f3_sp1_18_rev.tif	17apr15_PWD_f3	PWD female	PWD	female	Musc	M.musculus	30jun15_17apr15_PWD_f3_sp1_18_rev.tif_Batch0
Batch0		11mar15_28feb15_PWD_f6_sp1_8.1_rev.tif	21735-4276-16129.tif	2	20	29	yes	na	1	1	11mar15_28feb15_PWD_f6_sp1_8.1_rev.tif	28feb15_PWD_f6	PWD female	PWD	female	Musc	M.musculus	11mar15_28feb15_PWD_f6_sp1_8.1_rev.tif_Batch0
Batch0		13mar15_28feb15_PWD_f2_sp1_20_rev.tif	30641-23777-22532.tif	2	20	29	no	na	0	2	13mar15_28feb15_PWD_f2_sp1_20_rev.tif	28feb15_PWD_f2	PWD female	PWD	female	Musc	M.musculus	13mar15_28feb15_PWD_f2_sp1_20_rev.tif_Batch0
Batch0		11mar15_28feb15_PWD_f1_sp1_11.1_rev.tif	19197-12445-20978.tif	2	20	30	yes	na	0	3	11mar15_28feb15_PWD_f1_sp1_11.1_rev.tif	28feb15_PWD_f1	PWD female	PWD	female	Musc	M.musculus	11mar15_28feb15_PWD_f1_sp1_11.1_rev.tif_Batch0
Batch2		8apr15_1apr15_PWD_f1_sp1_12_rev.tif	11028-14516-24433.tif	2	20	22	no		0	0	8apr15_1apr15_PWD_f1_sp1_12_rev.tif	1apr15_PWD_f1	PWD female	PWD	female	Musc	M.musculus	8apr15_1apr15_PWD_f1_sp1_12_rev.tif_Batch2
Batch2		8apr15_1apr15_PWD_f1_sp1_8_rev.tif	1366-25758-26253.tif	2	20	27	no		1	0	8apr15_1apr15_PWD_f1_sp1_8_rev.tif	1apr15_PWD_f1	PWD female	PWD	female	Musc	M.musculus	8apr15_1apr15_PWD_f1_sp1_8_rev.tif_Batch2
Batch14		6dec14_8oct14_PWD_f2_sp1_10_rev.tif	7067-22944-4898.tif	2	20	22	no		2	0	6dec14_8oct14_PWD_f2_sp1_10_rev.tif	8oct14_PWD_f2	PWD female	PWD	female	Musc	M.musculus	6dec14_8oct14_PWD_f2_sp1_10_rev.tif_Batch14
Batch14		4dec14_8oct14_PWD_f1_sp1_5_rev.tif	16451-25544-19839.tif	2	20	25	yes some noise		1	0	4dec14_8oct14_PWD_f1_sp1_5_rev.tif	8oct14_PWD_f1	PWD female	PWD	female	Musc	M.musculus	4dec14_8oct14_PWD_f1_sp1_5_rev.tif_Batch14
Batch14		29jun15_8oct14_PWD_f1_sp2_4_rev.tif	8941-26729-3390.tif	2	20	23	no		3	0	29jun15_8oct14_PWD_f1_sp2_4_rev.tif	8oct14_PWD_f1	PWD female	PWD	female	Musc	M.musculus	29jun15_8oct14_PWD_f1_sp2_4_rev.tif_Batch14
Batch14		29jun15_8oct14_PWD_f1_sp2_3_rev.tif	15967-17040-10301.tif	2	20	25	no		0	0	29jun15_8oct14_PWD_f1_sp2_3_rev.tif	8oct14_PWD_f1	PWD female	PWD	female	Musc	M.musculus	29jun15_8oct14_PWD_f1_sp2_3_rev.tif_Batch14
Batch14		18jan15_8oct14_PWD_f5_sp1_4.3_rev.tif	7191-22855-18238.tif	2	20	23	no		2	0	18jan15_8oct14_PWD_f5_sp1_4.3_rev.tif	8oct14_PWD_f5	PWD female	PWD	female	Musc	M.musculus	18jan15_8oct14_PWD_f5_sp1_4.3_rev.tif_Batch14
Batch0		17mar15_10mar15_PWD_m1_sp1_12.2_rev.tif	5964-23170-15217.tif	2	20	28	yes	yes	0	0	17mar15_10mar15_PWD_m1_sp1_12.2_rev.tif	10mar15_PWD_m1	PWD male	PWD	male	Musc	M.musculus	17mar15_10mar15_PWD_m1_sp1_12.2_rev.tif_Batch0
Batch0		17mar15_10mar15_PWD_m1_sp1_4_rev.tif	18647-30931-20070.tif	2	20	32	no	yes	0	0	17mar15_10mar15_PWD_m1_sp1_4_rev.tif	10mar15_PWD_m1	PWD male	PWD	male	Musc	M.musculus	17mar15_10mar15_PWD_m1_sp1_4_rev.tif_Batch0
Batch0		22mar15_10mar15_PWD_m1_sp1_6.1_rev.tif	19942-12394-13369.tif	2	20	22	no	yes	0	0	22mar15_10mar15_PWD_m1_sp1_6.1_rev.tif	10mar15_PWD_m1	PWD male	PWD	male	Musc	M.musculus	22mar15_10mar15_PWD_m1_sp1_6.1_rev.tif_Batch0
Batch0		22mar15_10mar15_PWD_m2_sp1_13.3_rev.tif	25444-27491-24173.tif	2	20	31	no	yes	0	0	22mar15_10mar15_PWD_m2_sp1_13.3_rev.tif	10mar15_PWD_m2	PWD male	PWD	male	Musc	M.musculus	22mar15_10mar15_PWD_m2_sp1_13.3_rev.tif_Batch0
Batch0		22mar15_10mar15_PWD_m2_sp1_2_rev.tif	32098-6385-28207.tif	2	20	29	no	yes	0	0	22mar15_10mar15_PWD_m2_sp1_2_rev.tif	10mar15_PWD_m2	PWD male	PWD	male	Musc	M.musculus	22mar15_10mar15_PWD_m2_sp1_2_rev.tif_Batch0
Batch0		22mar15_10mar15_PWD_m2_sp1_9_rev.tif	4284-9055-13020.tif	2	20	22	no	yes	0	0	22mar15_10mar15_PWD_m2_sp1_9_rev.tif	10mar15_PWD_m2	PWD male	PWD	male	Musc	M.musculus	22mar15_10mar15_PWD_m2_sp1_9_rev.tif_Batch0
Batch0		20jul15_18may15_PWD_m1_sp1_13_rev.tif	30283-23181-27845.tif	2	20	29	no	yes	0	0	20jul15_18may15_PWD_m1_sp1_13_rev.tif	18may15_PWD_m1	PWD male	PWD	male	Musc	M.musculus	20jul15_18may15_PWD_m1_sp1_13_rev.tif_Batch0
Batch0		20jul15_18may15_PWD_m1_sp1_18.1_rev.tif	2709-18315-11531.tif	2	20	32	no	yes	0	0	20jul15_18may15_PWD_m1_sp1_18.1_rev.tif	18may15_PWD_m1	PWD male	PWD	male	Musc	M.musculus	20jul15_18may15_PWD_m1_sp1_18.1_rev.tif_Batch0
Batch0		20jul15_18may15_PWD_m1_sp1_19_rev.tif	10133-30283-20700.tif	2	20	31	no	yes	0	0	20jul15_18may15_PWD_m1_sp1_19_rev.tif	18may15_PWD_m1	PWD male	PWD	male	Musc	M.musculus	20jul15_18may15_PWD_m1_sp1_19_rev.tif_Batch0
Batch0		20jul15_18may15_PWD_m1_sp1_23.2_rev.tif	19380-15045-1301.tif	2	20	29	no	yes	0	0	20jul15_18may15_PWD_m1_sp1_23.2_rev.tif	18may15_PWD_m1	PWD male	PWD	male	Musc	M.musculus	20jul15_18may15_PWD_m1_sp1_23.2_rev.tif_Batch0
Batch0		20jul15_18may15_PWD_m1_sp1_3_rev.tif	3590-4059-22321.tif	2	20	34	no	yes	0	0	20jul15_18may15_PWD_m1_sp1_3_rev.tif	18may15_PWD_m1	PWD male	PWD	male	Musc	M.musculus	20jul15_18may15_PWD_m1_sp1_3_rev.tif_Batch0
Batch0		20jul15_18may15_PWD_m1_sp1_6.1_rev.tif	28995-25463-29460.tif	2	20	29	no	yes	0	0	20jul15_18may15_PWD_m1_sp1_6.1_rev.tif	18may15_PWD_m1	PWD male	PWD	male	Musc	M.musculus	20jul15_18may15_PWD_m1_sp1_6.1_rev.tif_Batch0
Batch0		20jul15_18may15_PWD_m1_sp1_6.2_rev.tif	11014-17027-8958.tif	2	20	31	no	1 CO	0	0	20jul15_18may15_PWD_m1_sp1_6.2_rev.tif	18may15_PWD_m1	PWD male	PWD	male	Musc	M.musculus	20jul15_18may15_PWD_m1_sp1_6.2_rev.tif_Batch0
Batch0		20jul15_18may15_PWD_m2_sp1_11.1_rev.tif	10865-7057-4230.tif	2	20	28	no	yes	0	0	20jul15_18may15_PWD_m2_sp1_11.1_rev.tif	18may15_PWD_m2	PWD male	PWD	male	Musc	M.musculus	20jul15_18may15_PWD_m2_sp1_11.1_rev.tif_Batch0
Batch0		20jul15_18may15_PWD_m2_sp1_3.1_rev.tif	13050-28392-32128.tif	2	20	30	no	yes	0	0	20jul15_18may15_PWD_m2_sp1_3.1_rev.tif	18may15_PWD_m2	PWD male	PWD	male	Musc	M.musculus	20jul15_18may15_PWD_m2_sp1_3.1_rev.tif_Batch0
Batch0		20jul15_18may15_PWD_m2_sp1_3.3_rev.tif	10755-32067-5141.tif	2	20	30	no	yes	0	0	20jul15_18may15_PWD_m2_sp1_3.3_rev.tif	18may15_PWD_m2	PWD male	PWD	male	Musc	M.musculus	20jul15_18may15_PWD_m2_sp1_3.3_rev.tif_Batch0
Batch0		6mar15_1mar15_PWD_m1_sp4_3_rev.tif	14902-26180-4988.tif	2	20	34	no	yes	0	0	6mar15_1mar15_PWD_m1_sp4_3_rev.tif	1mar15_PWD_m1	PWD male	PWD	male	Musc	M.musculus	6mar15_1mar15_PWD_m1_sp4_3_rev.tif_Batch0
Batch0		8apr15_24mar15_PWD_m2_sp1_15.1_rev.tif	31592-31889-30570.tif	2	20	27	no	yes	0	0	8apr15_24mar15_PWD_m2_sp1_15.1_rev.tif	24mar15_PWD_m2	PWD male	PWD	male	Musc	M.musculus	8apr15_24mar15_PWD_m2_sp1_15.1_rev.tif_Batch0
Batch0		27mar16_6mar16_PWD_m1_sp1_1_rev.tif	26919-14356-24704.tif	2	20	29	no	yes	0	0	27mar16_6mar16_PWD_m1_sp1_1_rev.tif	6mar16_PWD_m1	PWD male	PWD	male	Musc	M.musculus	27mar16_6mar16_PWD_m1_sp1_1_rev.tif_Batch0
Batch0		27mar16_6mar16_PWD_m1_sp1_4_rev.tif	3153-4055-26927.tif	2	20	27	no	yes	0	0	27mar16_6mar16_PWD_m1_sp1_4_rev.tif	6mar16_PWD_m1	PWD male	PWD	male	Musc	M.musculus	27mar16_6mar16_PWD_m1_sp1_4_rev.tif_Batch0
Batch0		22mar15_10mar15_PWD_m1_sp1_10.3_rev.tif	5713-18526-31516.tif	2	20	29	yes	yes	0	0	22mar15_10mar15_PWD_m1_sp1_10.3_rev.tif	10mar15_PWD_m1	PWD male	PWD	male	Musc	M.musculus	22mar15_10mar15_PWD_m1_sp1_10.3_rev.tif_Batch0
Batch0		6mar15_1mar15_PWD_m1_sp4_5_rev.tif	3920-17650-473.tif	2	20	29	yes	yes	0	0	6mar15_1mar15_PWD_m1_sp4_5_rev.tif	1mar15_PWD_m1	PWD male	PWD	male	Musc	M.musculus	6mar15_1mar15_PWD_m1_sp4_5_rev.tif_Batch0
Batch0		22mar15_10mar15_PWD_m1_sp1_9.1_rev.tif	16799-26270-8543.tif	2	20	33	yes	yes	0	0	22mar15_10mar15_PWD_m1_sp1_9.1_rev.tif	10mar15_PWD_m1	PWD male	PWD	male	Musc	M.musculus	22mar15_10mar15_PWD_m1_sp1_9.1_rev.tif_Batch0
Batch0		17mar15_10mar15_PWD_m1_sp1_1_rev.tif	8255-25191-20578.tif	2	20	28	yes	yes	1	0	17mar15_10mar15_PWD_m1_sp1_1_rev.tif	10mar15_PWD_m1	PWD male	PWD	male	Musc	M.musculus	17mar15_10mar15_PWD_m1_sp1_1_rev.tif_Batch0
Batch0		20jul15_18may15_PWD_m1_sp1_24_rev.tif	2503-4669-12523.tif	2	20	30	no	yes	1	0	20jul15_18may15_PWD_m1_sp1_24_rev.tif	18may15_PWD_m1	PWD male	PWD	male	Musc	M.musculus	20jul15_18may15_PWD_m1_sp1_24_rev.tif_Batch0
Batch0		20jul15_18may15_PWD_m2_sp1_12_rev.tif	28502-5579-9708.tif	2	20	31	no	yes	1	0	20jul15_18may15_PWD_m2_sp1_12_rev.tif	18may15_PWD_m2	PWD male	PWD	male	Musc	M.musculus	20jul15_18may15_PWD_m2_sp1_12_rev.tif_Batch0
Batch0		20jul15_18may15_PWD_m2_sp1_6_rev.tif	4083-1438-7738.tif	2	20	25	no	yes	1	0	20jul15_18may15_PWD_m2_sp1_6_rev.tif	18may15_PWD_m2	PWD male	PWD	male	Musc	M.musculus	20jul15_18may15_PWD_m2_sp1_6_rev.tif_Batch0
Batch0		8apr15_24mar15_PWD_m2_sp1_14_rev.tif	25774-12831-7375.tif	2	20	30	no	yes	1	0	8apr15_24mar15_PWD_m2_sp1_14_rev.tif	24mar15_PWD_m2	PWD male	PWD	male	Musc	M.musculus	8apr15_24mar15_PWD_m2_sp1_14_rev.tif_Batch0
Batch0		22mar15_10mar15_PWD_m2_sp1_12_rev.tif	26574-364-28432.tif	2	20	24	no	yes	3	0	22mar15_10mar15_PWD_m2_sp1_12_rev.tif	10mar15_PWD_m2	PWD male	PWD	male	Musc	M.musculus	22mar15_10mar15_PWD_m2_sp1_12_rev.tif_Batch0
Batch0		20jul15_18may15_PWD_m2_sp1_10.2_rev.tif	31418-1602-10048.tif	2	20	28	no	yes	0	1	20jul15_18may15_PWD_m2_sp1_10.2_rev.tif	18may15_PWD_m2	PWD male	PWD	male	Musc	M.musculus	20jul15_18may15_PWD_m2_sp1_10.2_rev.tif_Batch0
Batch0		20jul15_18may15_PWD_m2_sp1_24.2_rev.tif	22377-22051-27862.tif	2	20	31	no	yes	0	1	20jul15_18may15_PWD_m2_sp1_24.2_rev.tif	18may15_PWD_m2	PWD male	PWD	male	Musc	M.musculus	20jul15_18may15_PWD_m2_sp1_24.2_rev.tif_Batch0
Batch0		8apr15_24mar15_PWD_m2_sp1_7_rev.tif	9697-2263-31924.tif	2	20	27	no	yes	1	1	8apr15_24mar15_PWD_m2_sp1_7_rev.tif	24mar15_PWD_m2	PWD male	PWD	male	Musc	M.musculus	8apr15_24mar15_PWD_m2_sp1_7_rev.tif_Batch0
Batch0		17mar15_10mar15_PWD_m2_sp1_4_rev.tif	31121-26043-5805.tif	2	20	26	yes	yes			17mar15_10mar15_PWD_m2_sp1_4_rev.tif	10mar15_PWD_m2	PWD male	PWD	male	Musc	M.musculus	17mar15_10mar15_PWD_m2_sp1_4_rev.tif_Batch0
Batch13		7mar15_24sep14_PWD_m1_sp1_5_rev.tif	2142-10432-23495.tif	2	20	27	no	yes	0	0	7mar15_24sep14_PWD_m1_sp1_5_rev.tif	24sep14_PWD_m1	PWD male	PWD	male	Musc	M.musculus	7mar15_24sep14_PWD_m1_sp1_5_rev.tif_Batch13
Batch13		7mar15_24sep14_PWD_m1_sp1_14.1_rev.tif	16565-944-26590.tif	2	20	25	no	yes	0	0	7mar15_24sep14_PWD_m1_sp1_14.1_rev.tif	24sep14_PWD_m1	PWD male	PWD	male	Musc	M.musculus	7mar15_24sep14_PWD_m1_sp1_14.1_rev.tif_Batch13
Batch14		10jun19_31may19_SKIVE_f6_sp1_9_rev.tif	8095-9451-10875.tif	2	20	29	no		0	0	10jun19_31may19_SKIVE_f6_sp1_9_rev.tif	31may19_SKIVE_f6	SKIVE female	SKIVE	female	Musc	M.musculus	10jun19_31may19_SKIVE_f6_sp1_9_rev.tif_Batch14
Batch14		10jun19_31may19_SKIVE_f6_sp1_54_rev.tif	16218-16941-19627.tif	2	20	19	no		1	0	10jun19_31may19_SKIVE_f6_sp1_54_rev.tif	31may19_SKIVE_f6	SKIVE female	SKIVE	female	Musc	M.musculus	10jun19_31may19_SKIVE_f6_sp1_54_rev.tif_Batch14
Batch14		10jun19_31may19_SKIVE_f6_sp1_42_rev.tif	4277-31247-30957.tif	2	20	28	no		0	0	10jun19_31may19_SKIVE_f6_sp1_42_rev.tif	31may19_SKIVE_f6	SKIVE female	SKIVE	female	Musc	M.musculus	10jun19_31may19_SKIVE_f6_sp1_42_rev.tif_Batch14
Batch14		10jun19_31may19_SKIVE_f6_sp1_29_rev.tif	22656-17599-16639.tif	2	20	30	no		0	1	10jun19_31may19_SKIVE_f6_sp1_29_rev.tif	31may19_SKIVE_f6	SKIVE female	SKIVE	female	Musc	M.musculus	10jun19_31may19_SKIVE_f6_sp1_29_rev.tif_Batch14
Batch14		10jun19_31may19_SKIVE_f6_sp1_25_rev.tif	31464-15372-31778.tif	2	20	30	no		0	3	10jun19_31may19_SKIVE_f6_sp1_25_rev.tif	31may19_SKIVE_f6	SKIVE female	SKIVE	female	Musc	M.musculus	10jun19_31may19_SKIVE_f6_sp1_25_rev.tif_Batch14
Batch17		22jul19_26oct18_SKIVE_f3_sp1_14.1_rev.tif	3353-18487-30636.tif	2	20	25			1	0	22jul19_26oct18_SKIVE_f3_sp1_14.1_rev.tif	26oct18_SKIVE_f3	SKIVE female	SKIVE	female	Musc	M.musculus	22jul19_26oct18_SKIVE_f3_sp1_14.1_rev.tif_Batch17
Batch13		11jan19_27oct18_SKIVE_m1_sp1_15.1_rev.tif	9780-14429-29046.tif	2	20	20	no	yes	1	0	11jan19_27oct18_SKIVE_m1_sp1_15.1_rev.tif	27oct18_SKIVE_m1	SKIVE male	SKIVE	male	Musc	M.musculus	11jan19_27oct18_SKIVE_m1_sp1_15.1_rev.tif_Batch13
Batch13		11jan19_27oct18_SKIVE_m1_sp1_17_rev.tif	9525-8196-24132.tif	2	20	26	no	yes	1	0	11jan19_27oct18_SKIVE_m1_sp1_17_rev.tif	27oct18_SKIVE_m1	SKIVE male	SKIVE	male	Musc	M.musculus	11jan19_27oct18_SKIVE_m1_sp1_17_rev.tif_Batch13
Batch13		11jan19_27oct18_SKIVE_m1_sp1_31_rev.tif	9315-13873-17836.tif	2	20	27	no	yes	0	0	11jan19_27oct18_SKIVE_m1_sp1_31_rev.tif	27oct18_SKIVE_m1	SKIVE male	SKIVE	male	Musc	M.musculus	11jan19_27oct18_SKIVE_m1_sp1_31_rev.tif_Batch13
Batch13		5jan19_27oct18_SKIVE_m2_sp1_2_rev.tif	7589-7602-8304.tif	2	20	26	no	yes	0	0	5jan19_27oct18_SKIVE_m2_sp1_2_rev.tif	27oct18_SKIVE_m2	SKIVE male	SKIVE	male	Musc	M.musculus	5jan19_27oct18_SKIVE_m2_sp1_2_rev.tif_Batch13
Batch13		11jan19_27oct18_SKIVE_m1_sp1_11_rev.tif	7306-8910-26648.tif	2	20	25	no	yes	0	0	11jan19_27oct18_SKIVE_m1_sp1_11_rev.tif	27oct18_SKIVE_m1	SKIVE male	SKIVE	male	Musc	M.musculus	11jan19_27oct18_SKIVE_m1_sp1_11_rev.tif_Batch13
Batch13		5jan19_27oct18_SKIVE_m2_sp1_26.1_rev.tif	4742-23495-12618.tif	2	20	25	no	yes	1	0	5jan19_27oct18_SKIVE_m2_sp1_26.1_rev.tif	27oct18_SKIVE_m2	SKIVE male	SKIVE	male	Musc	M.musculus	5jan19_27oct18_SKIVE_m2_sp1_26.1_rev.tif_Batch13
Batch13		11jan19_27oct18_SKIVE_m1_sp1_23.2_rev.tif	4686-10127-6402.tif	2	20	26		yes	0	0	11jan19_27oct18_SKIVE_m1_sp1_23.2_rev.tif	27oct18_SKIVE_m1	SKIVE male	SKIVE	male	Musc	M.musculus	11jan19_27oct18_SKIVE_m1_sp1_23.2_rev.tif_Batch13
Batch13		11jan19_27oct18_SKIVE_m1_sp1_20.1_rev.tif	30116-14291-10832.tif	2	20	28	no	yes	0	0	11jan19_27oct18_SKIVE_m1_sp1_20.1_rev.tif	27oct18_SKIVE_m1	SKIVE male	SKIVE	male	Musc	M.musculus	11jan19_27oct18_SKIVE_m1_sp1_20.1_rev.tif_Batch13
Batch13		11jan19_27oct18_SKIVE_m1_sp1_26_rev.tif	26939-2675-12228.tif	2	20	26	no	yes	0	0	11jan19_27oct18_SKIVE_m1_sp1_26_rev.tif	27oct18_SKIVE_m1	SKIVE male	SKIVE	male	Musc	M.musculus	11jan19_27oct18_SKIVE_m1_sp1_26_rev.tif_Batch13
Batch13		11jan19_27oct18_SKIVE_m1_sp1_13.1_rev.tif	24987-12478-31422.tif	2	20	25	no	yes	0	0	11jan19_27oct18_SKIVE_m1_sp1_13.1_rev.tif	27oct18_SKIVE_m1	SKIVE male	SKIVE	male	Musc	M.musculus	11jan19_27oct18_SKIVE_m1_sp1_13.1_rev.tif_Batch13
Batch13		5jan19_27oct18_SKIVE_m2_sp1_16_rev.tif	23462-22470-26144.tif	2	20	29	no	yes	1	0	5jan19_27oct18_SKIVE_m2_sp1_16_rev.tif	27oct18_SKIVE_m2	SKIVE male	SKIVE	male	Musc	M.musculus	5jan19_27oct18_SKIVE_m2_sp1_16_rev.tif_Batch13
Batch13		5jan19_27oct18_SKIVE_m2_sp1_18_rev.tif	20933-90-30441.tif	2	20	32	no	yes	0	0	5jan19_27oct18_SKIVE_m2_sp1_18_rev.tif	27oct18_SKIVE_m2	SKIVE male	SKIVE	male	Musc	M.musculus	5jan19_27oct18_SKIVE_m2_sp1_18_rev.tif_Batch13
Batch13		11jan19_27oct18_SKIVE_m1_sp1_20.3_rev.tif	20364-25698-12210.tif	2	20	24	no	yes	1	0	11jan19_27oct18_SKIVE_m1_sp1_20.3_rev.tif	27oct18_SKIVE_m1	SKIVE male	SKIVE	male	Musc	M.musculus	11jan19_27oct18_SKIVE_m1_sp1_20.3_rev.tif_Batch13
Batch13		11jan19_27oct18_SKIVE_m1_sp1_10_rev.tif	20108-30950-21868.tif	2	20	24	no	yes	1	0	11jan19_27oct18_SKIVE_m1_sp1_10_rev.tif	27oct18_SKIVE_m1	SKIVE male	SKIVE	male	Musc	M.musculus	11jan19_27oct18_SKIVE_m1_sp1_10_rev.tif_Batch13
Batch13		11jan19_27oct18_SKIVE_m1_sp1_21_rev.tif	16119-20860-23841.tif	2	20	26	no	yes	0	0	11jan19_27oct18_SKIVE_m1_sp1_21_rev.tif	27oct18_SKIVE_m1	SKIVE male	SKIVE	male	Musc	M.musculus	11jan19_27oct18_SKIVE_m1_sp1_21_rev.tif_Batch13
Batch13		11jan19_27oct18_SKIVE_m1_sp1_8.2_rev.tif	15606-27633-19616.tif	2	20	26	no	yes	0	0	11jan19_27oct18_SKIVE_m1_sp1_8.2_rev.tif	27oct18_SKIVE_m1	SKIVE male	SKIVE	male	Musc	M.musculus	11jan19_27oct18_SKIVE_m1_sp1_8.2_rev.tif_Batch13
Batch13		11jan19_27oct18_SKIVE_m1_sp1_24_rev.tif	11000-5208-17372.tif	2	20	27	no	yes	0	0	11jan19_27oct18_SKIVE_m1_sp1_24_rev.tif	27oct18_SKIVE_m1	SKIVE male	SKIVE	male	Musc	M.musculus	11jan19_27oct18_SKIVE_m1_sp1_24_rev.tif_Batch13
Batch15		18jul19_31may19_SKIVE_m2_sp1_12_rev.tif	25288-18841-5274.tif	2	20	26	no	yes	0	0	18jul19_31may19_SKIVE_m2_sp1_12_rev.tif	31may19_SKIVE_m2	SKIVE male	SKIVE	male	Musc	M.musculus	18jul19_31may19_SKIVE_m2_sp1_12_rev.tif_Batch15
Batch15		18jul19_31may19_SKIVE_m2_sp1_5_rev.tif	13085-20399-509.tif	2	20	27	no	yes	0	0	18jul19_31may19_SKIVE_m2_sp1_5_rev.tif	31may19_SKIVE_m2	SKIVE male	SKIVE	male	Musc	M.musculus	18jul19_31may19_SKIVE_m2_sp1_5_rev.tif_Batch15
Batch15		18jul19_31may19_SKIVE_m2_sp1_13.2_rev.tif	6522-19426-9475.tif	2	20	27	no	yes	0	0	18jul19_31may19_SKIVE_m2_sp1_13.2_rev.tif	31may19_SKIVE_m2	SKIVE male	SKIVE	male	Musc	M.musculus	18jul19_31may19_SKIVE_m2_sp1_13.2_rev.tif_Batch15
Batch15		18jul19_31may19_SKIVE_m2_sp1_19_rev.tif	1556-32406-14474.tif	2	20	28	no	yes	0	0	18jul19_31may19_SKIVE_m2_sp1_19_rev.tif	31may19_SKIVE_m2	SKIVE male	SKIVE	male	Musc	M.musculus	18jul19_31may19_SKIVE_m2_sp1_19_rev.tif_Batch15
Batch15		18jul19_31may19_SKIVE_m2_sp1_15_rev.tif	16348-9052-27427.tif	2	20	29	no	yes	0	0	18jul19_31may19_SKIVE_m2_sp1_15_rev.tif	31may19_SKIVE_m2	SKIVE male	SKIVE	male	Musc	M.musculus	18jul19_31may19_SKIVE_m2_sp1_15_rev.tif_Batch15
Batch15		18jul19_31may19_SKIVE_m2_sp1_26_rev.tif	21422-30257-19937.tif	2	20	29	no	yes	0	0	18jul19_31may19_SKIVE_m2_sp1_26_rev.tif	31may19_SKIVE_m2	SKIVE male	SKIVE	male	Musc	M.musculus	18jul19_31may19_SKIVE_m2_sp1_26_rev.tif_Batch15
Batch15		18jul19_31may19_SKIVE_m2_sp1_27.1_rev.tif	24277-8929-30007.tif	2	20	29	no	yes	0	0	18jul19_31may19_SKIVE_m2_sp1_27.1_rev.tif	31may19_SKIVE_m2	SKIVE male	SKIVE	male	Musc	M.musculus	18jul19_31may19_SKIVE_m2_sp1_27.1_rev.tif_Batch15
Batch15		18jul19_31may19_SKIVE_m2_sp1_21.2_rev.tif	25037-8540-2857.tif	2	20	29	no	yes	0	0	18jul19_31may19_SKIVE_m2_sp1_21.2_rev.tif	31may19_SKIVE_m2	SKIVE male	SKIVE	male	Musc	M.musculus	18jul19_31may19_SKIVE_m2_sp1_21.2_rev.tif_Batch15
Batch15		18jul19_31may19_SKIVE_m2_sp1_30_rev.tif	27639-23272-7622.tif	2	20	29	no	yes	0	0	18jul19_31may19_SKIVE_m2_sp1_30_rev.tif	31may19_SKIVE_m2	SKIVE male	SKIVE	male	Musc	M.musculus	18jul19_31may19_SKIVE_m2_sp1_30_rev.tif_Batch15
Batch15		18jul19_31may19_SKIVE_m2_sp1_20_rev.tif	972-32305-6998.tif	2	20	32	no	yes	0	0	18jul19_31may19_SKIVE_m2_sp1_20_rev.tif	31may19_SKIVE_m2	SKIVE male	SKIVE	male	Musc	M.musculus	18jul19_31may19_SKIVE_m2_sp1_20_rev.tif_Batch15
Batch18		12sep19_19aug19_SKIVE_m1_sp1_10.1_rev.tif	10220-4904-6396.tif	2	20	31	no	yes	0	0	12sep19_19aug19_SKIVE_m1_sp1_10.1_rev.tif	19aug19_SKIVE_m1	SKIVE male	SKIVE	male	Musc	M.musculus	12sep19_19aug19_SKIVE_m1_sp1_10.1_rev.tif_Batch18
Batch18		12sep19_19aug19_SKIVE_m1_sp1_10.2_rev.tif	2648-24939-32692.tif	2	20	24	no	yes	0	0	12sep19_19aug19_SKIVE_m1_sp1_10.2_rev.tif	19aug19_SKIVE_m1	SKIVE male	SKIVE	male	Musc	M.musculus	12sep19_19aug19_SKIVE_m1_sp1_10.2_rev.tif_Batch18
Batch18		12sep19_19aug19_SKIVE_m1_sp1_22.1_rev.tif	19935-4369-27182.tif	2	20	26	no	yes	0	0	12sep19_19aug19_SKIVE_m1_sp1_22.1_rev.tif	19aug19_SKIVE_m1	SKIVE male	SKIVE	male	Musc	M.musculus	12sep19_19aug19_SKIVE_m1_sp1_22.1_rev.tif_Batch18
Batch18		12sep19_19aug19_SKIVE_m1_sp1_22.2_rev.tif	10089-17392-10214.tif	2	20	25	no	yes	1	0	12sep19_19aug19_SKIVE_m1_sp1_22.2_rev.tif	19aug19_SKIVE_m1	SKIVE male	SKIVE	male	Musc	M.musculus	12sep19_19aug19_SKIVE_m1_sp1_22.2_rev.tif_Batch18
Batch18		12sep19_19aug19_SKIVE_m1_sp1_23.4_rev.tif	19264-27177-26046.tif	2	20	29	no	yes	0	0	12sep19_19aug19_SKIVE_m1_sp1_23.4_rev.tif	19aug19_SKIVE_m1	SKIVE male	SKIVE	male	Musc	M.musculus	12sep19_19aug19_SKIVE_m1_sp1_23.4_rev.tif_Batch18
Batch18		12sep19_19aug19_SKIVE_m1_sp1_24.2_rev.tif	31257-6943-18108.tif	2	20	28	no	yes	0	0	12sep19_19aug19_SKIVE_m1_sp1_24.2_rev.tif	19aug19_SKIVE_m1	SKIVE male	SKIVE	male	Musc	M.musculus	12sep19_19aug19_SKIVE_m1_sp1_24.2_rev.tif_Batch18
Batch18		12sep19_19aug19_SKIVE_m1_sp1_5.4_rev.tif	29176-2022-18986.tif	2	20	24	no	no	0	0	12sep19_19aug19_SKIVE_m1_sp1_5.4_rev.tif	19aug19_SKIVE_m1	SKIVE male	SKIVE	male	Musc	M.musculus	12sep19_19aug19_SKIVE_m1_sp1_5.4_rev.tif_Batch18
Batch18		12sep19_31may19_SKIVE_m1_sp1_11_rev.tif	18469-5100-16227.tif	2	20	29	no	yes	0	0	12sep19_31may19_SKIVE_m1_sp1_11_rev.tif	31may19_SKIVE_m1	SKIVE male	SKIVE	male	Musc	M.musculus	12sep19_31may19_SKIVE_m1_sp1_11_rev.tif_Batch18
Batch18		12sep19_31may19_SKIVE_m1_sp1_12.1_rev.tif	13838-13963-22663.tif	2	20	29	no	yes	0	0	12sep19_31may19_SKIVE_m1_sp1_12.1_rev.tif	31may19_SKIVE_m1	SKIVE male	SKIVE	male	Musc	M.musculus	12sep19_31may19_SKIVE_m1_sp1_12.1_rev.tif_Batch18
Batch18		12sep19_31may19_SKIVE_m1_sp1_12.2_rev.tif	21868-3740-2594.tif	2	20	24	no	yes	0	0	12sep19_31may19_SKIVE_m1_sp1_12.2_rev.tif	31may19_SKIVE_m1	SKIVE male	SKIVE	male	Musc	M.musculus	12sep19_31may19_SKIVE_m1_sp1_12.2_rev.tif_Batch18
Batch18		12sep19_31may19_SKIVE_m1_sp1_13.1_rev.tif	12294-1295-30566.tif	2	20	20	no	yes	1	0	12sep19_31may19_SKIVE_m1_sp1_13.1_rev.tif	31may19_SKIVE_m1	SKIVE male	SKIVE	male	Musc	M.musculus	12sep19_31may19_SKIVE_m1_sp1_13.1_rev.tif_Batch18
Batch18		12sep19_31may19_SKIVE_m1_sp1_18.2_rev.tif	31904-13852-32723.tif	2	20	25	no	yes	0	0	12sep19_31may19_SKIVE_m1_sp1_18.2_rev.tif	31may19_SKIVE_m1	SKIVE male	SKIVE	male	Musc	M.musculus	12sep19_31may19_SKIVE_m1_sp1_18.2_rev.tif_Batch18
Batch18		12sep19_31may19_SKIVE_m1_sp1_19_rev.tif	19996-30498-15838.tif	2	20	25	no	yes	0	0	12sep19_31may19_SKIVE_m1_sp1_19_rev.tif	31may19_SKIVE_m1	SKIVE male	SKIVE	male	Musc	M.musculus	12sep19_31may19_SKIVE_m1_sp1_19_rev.tif_Batch18
Batch18		12sep19_31may19_SKIVE_m1_sp1_20_rev.tif	10708-28600-31174.tif	2	20	27	no	yes	0	0	12sep19_31may19_SKIVE_m1_sp1_20_rev.tif	31may19_SKIVE_m1	SKIVE male	SKIVE	male	Musc	M.musculus	12sep19_31may19_SKIVE_m1_sp1_20_rev.tif_Batch18
Batch18		12sep19_31may19_SKIVE_m1_sp1_22.1_rev.tif	27801-13463-16619.tif	2	20	31	no	yes	0	0	12sep19_31may19_SKIVE_m1_sp1_22.1_rev.tif	31may19_SKIVE_m1	SKIVE male	SKIVE	male	Musc	M.musculus	12sep19_31may19_SKIVE_m1_sp1_22.1_rev.tif_Batch18
Batch18		12sep19_31may19_SKIVE_m1_sp1_6.1_rev.tif	15213-29491-13492.tif	2	20	27	no	yes	0	0	12sep19_31may19_SKIVE_m1_sp1_6.1_rev.tif	31may19_SKIVE_m1	SKIVE male	SKIVE	male	Musc	M.musculus	12sep19_31may19_SKIVE_m1_sp1_6.1_rev.tif_Batch18
Batch18		12sep19_31may19_SKIVE_m1_sp1_8.1_rev.tif	21166-11227-23621.tif	2	20	25	no	yes	0	0	12sep19_31may19_SKIVE_m1_sp1_8.1_rev.tif	31may19_SKIVE_m1	SKIVE male	SKIVE	male	Musc	M.musculus	12sep19_31may19_SKIVE_m1_sp1_8.1_rev.tif_Batch18
Batch18		18sep19_19aug19_SKIVE_m2_sp1_11_rev.tif	7251-28981-24446.tif	2	20	33	no	no	0	0	18sep19_19aug19_SKIVE_m2_sp1_11_rev.tif	19aug19_SKIVE_m2	SKIVE male	SKIVE	male	Musc	M.musculus	18sep19_19aug19_SKIVE_m2_sp1_11_rev.tif_Batch18
Batch18		18sep19_19aug19_SKIVE_m2_sp1_14.2_rev.tif	13468-25415-18243.tif	2	20	27	no	yes	0	0	18sep19_19aug19_SKIVE_m2_sp1_14.2_rev.tif	19aug19_SKIVE_m2	SKIVE male	SKIVE	male	Musc	M.musculus	18sep19_19aug19_SKIVE_m2_sp1_14.2_rev.tif_Batch18
Batch18		18sep19_19aug19_SKIVE_m2_sp1_15.2_rev.tif	14775-32028-2357.tif	2	20	26	no	yes	0	0	18sep19_19aug19_SKIVE_m2_sp1_15.2_rev.tif	19aug19_SKIVE_m2	SKIVE male	SKIVE	male	Musc	M.musculus	18sep19_19aug19_SKIVE_m2_sp1_15.2_rev.tif_Batch18
Batch18		18sep19_19aug19_SKIVE_m2_sp1_17.1_rev.tif	5117-7181-29113.tif	2	20	28	no	yes	0	0	18sep19_19aug19_SKIVE_m2_sp1_17.1_rev.tif	19aug19_SKIVE_m2	SKIVE male	SKIVE	male	Musc	M.musculus	18sep19_19aug19_SKIVE_m2_sp1_17.1_rev.tif_Batch18
Batch18		18sep19_19aug19_SKIVE_m2_sp1_18.1_rev.tif	21969-11810-15247.tif	2	20	26	no	yes	0	0	18sep19_19aug19_SKIVE_m2_sp1_18.1_rev.tif	19aug19_SKIVE_m2	SKIVE male	SKIVE	male	Musc	M.musculus	18sep19_19aug19_SKIVE_m2_sp1_18.1_rev.tif_Batch18
Batch18		18sep19_19aug19_SKIVE_m2_sp1_2.1_rev.tif	10732-17275-13547.tif	2	20	24	no	yes	0	0	18sep19_19aug19_SKIVE_m2_sp1_2.1_rev.tif	19aug19_SKIVE_m2	SKIVE male	SKIVE	male	Musc	M.musculus	18sep19_19aug19_SKIVE_m2_sp1_2.1_rev.tif_Batch18
Batch18		18sep19_19aug19_SKIVE_m2_sp1_23.2_rev.tif	30793-18398-2676.tif	2	20	26	no	yes	0	0	18sep19_19aug19_SKIVE_m2_sp1_23.2_rev.tif	19aug19_SKIVE_m2	SKIVE male	SKIVE	male	Musc	M.musculus	18sep19_19aug19_SKIVE_m2_sp1_23.2_rev.tif_Batch18
Batch18		18sep19_19aug19_SKIVE_m2_sp1_24_rev.tif	1056-4742-30210.tif	2	20	27	no	yes	0	0	18sep19_19aug19_SKIVE_m2_sp1_24_rev.tif	19aug19_SKIVE_m2	SKIVE male	SKIVE	male	Musc	M.musculus	18sep19_19aug19_SKIVE_m2_sp1_24_rev.tif_Batch18
Batch18		18sep19_19aug19_SKIVE_m2_sp1_27.1_rev.tif	18581-31849-14162.tif	2	20	24	no	yes	1	0	18sep19_19aug19_SKIVE_m2_sp1_27.1_rev.tif	19aug19_SKIVE_m2	SKIVE male	SKIVE	male	Musc	M.musculus	18sep19_19aug19_SKIVE_m2_sp1_27.1_rev.tif_Batch18
Batch18		18sep19_19aug19_SKIVE_m2_sp1_28.2_rev.tif	28050-13210-24875.tif	2	20	20	no	no	1	0	18sep19_19aug19_SKIVE_m2_sp1_28.2_rev.tif	19aug19_SKIVE_m2	SKIVE male	SKIVE	male	Musc	M.musculus	18sep19_19aug19_SKIVE_m2_sp1_28.2_rev.tif_Batch18
Batch18		18sep19_19aug19_SKIVE_m2_sp1_28.3_rev.tif	31790-6132-13922.tif	2	20	28	no	yes	0	0	18sep19_19aug19_SKIVE_m2_sp1_28.3_rev.tif	19aug19_SKIVE_m2	SKIVE male	SKIVE	male	Musc	M.musculus	18sep19_19aug19_SKIVE_m2_sp1_28.3_rev.tif_Batch18
Batch18		18sep19_19aug19_SKIVE_m2_sp1_29.1_rev.tif	7499-7078-23101.tif	2	20	25	no	yes	0	0	18sep19_19aug19_SKIVE_m2_sp1_29.1_rev.tif	19aug19_SKIVE_m2	SKIVE male	SKIVE	male	Musc	M.musculus	18sep19_19aug19_SKIVE_m2_sp1_29.1_rev.tif_Batch18
Batch18		18sep19_19aug19_SKIVE_m2_sp1_29.2_rev.tif	14514-14618-25914.tif	2	20	28	no	yes	0	0	18sep19_19aug19_SKIVE_m2_sp1_29.2_rev.tif	19aug19_SKIVE_m2	SKIVE male	SKIVE	male	Musc	M.musculus	18sep19_19aug19_SKIVE_m2_sp1_29.2_rev.tif_Batch18
Batch18		18sep19_19aug19_SKIVE_m2_sp1_3.1_rev.tif	5829-26255-30556.tif	2	20	29	no	yes	0	0	18sep19_19aug19_SKIVE_m2_sp1_3.1_rev.tif	19aug19_SKIVE_m2	SKIVE male	SKIVE	male	Musc	M.musculus	18sep19_19aug19_SKIVE_m2_sp1_3.1_rev.tif_Batch18
Batch18		18sep19_19aug19_SKIVE_m2_sp1_31_rev.tif	7763-4539-16154.tif	2	20	27	no	yes	0	0	18sep19_19aug19_SKIVE_m2_sp1_31_rev.tif	19aug19_SKIVE_m2	SKIVE male	SKIVE	male	Musc	M.musculus	18sep19_19aug19_SKIVE_m2_sp1_31_rev.tif_Batch18
Batch18		18sep19_19aug19_SKIVE_m2_sp1_4.1_rev.tif	7400-7089-14574.tif	2	20	24	no	yes	0	0	18sep19_19aug19_SKIVE_m2_sp1_4.1_rev.tif	19aug19_SKIVE_m2	SKIVE male	SKIVE	male	Musc	M.musculus	18sep19_19aug19_SKIVE_m2_sp1_4.1_rev.tif_Batch18
Batch18		18sep19_19aug19_SKIVE_m2_sp1_7.2_rev.tif	28808-27455-17682.tif	2	20	28	no	yes	0	0	18sep19_19aug19_SKIVE_m2_sp1_7.2_rev.tif	19aug19_SKIVE_m2	SKIVE male	SKIVE	male	Musc	M.musculus	18sep19_19aug19_SKIVE_m2_sp1_7.2_rev.tif_Batch18
Batch18		18sep19_19aug19_SKIVE_m2_sp1_8.1_rev.tif	2722-28166-24592.tif	2	20	27	no	yes	0	0	18sep19_19aug19_SKIVE_m2_sp1_8.1_rev.tif	19aug19_SKIVE_m2	SKIVE male	SKIVE	male	Musc	M.musculus	18sep19_19aug19_SKIVE_m2_sp1_8.1_rev.tif_Batch18
Batch18		18sep19_19aug19_SKIVE_m2_sp1_8.2_rev.tif	19456-15863-4848.tif	2	20	26	no	yes	0	0	18sep19_19aug19_SKIVE_m2_sp1_8.2_rev.tif	19aug19_SKIVE_m2	SKIVE male	SKIVE	male	Musc	M.musculus	18sep19_19aug19_SKIVE_m2_sp1_8.2_rev.tif_Batch18
Batch18		18sep19_19aug19_SKIVE_m2_sp1_9.1_rev.tif	11796-29044-5946.tif	2	20	30	no	yes	0	0	18sep19_19aug19_SKIVE_m2_sp1_9.1_rev.tif	19aug19_SKIVE_m2	SKIVE male	SKIVE	male	Musc	M.musculus	18sep19_19aug19_SKIVE_m2_sp1_9.1_rev.tif_Batch18
batch10		4feb18_31dec17_SPI_f1_sp1_4_rev.tif	15373-2997-23956.tif	2	20	27	no		0	0	4feb18_31dec17_SPI_f1_sp1_4_rev.tif	31dec17_SPI_f1	SPI female	SPI	female	M.spicilegus	M.spicilegus	4feb18_31dec17_SPI_f1_sp1_4_rev.tif_batch10
batch10		4feb18_31dec17_SPI_f1_sp1_9_rev.tif	16813-13560-19222.tif	2	20	37	yes		0	0	4feb18_31dec17_SPI_f1_sp1_9_rev.tif	31dec17_SPI_f1	SPI female	SPI	female	M.spicilegus	M.spicilegus	4feb18_31dec17_SPI_f1_sp1_9_rev.tif_batch10
batch12		5apr18_31dec17_SPI_f2_sp1_23_rev.tif	6869-6930-10463.tif	2	20	35	no		1	0	5apr18_31dec17_SPI_f2_sp1_23_rev.tif	31dec17_SPI_f2	SPI female	SPI	female	M.spicilegus	M.spicilegus	5apr18_31dec17_SPI_f2_sp1_23_rev.tif_batch12
Batch5		5sep17_21aug17_SPI_f2_sp1_30_rev.tif	2635-6301-1138.tif	2	20	30	no		0	0	5sep17_21aug17_SPI_f2_sp1_30_rev.tif	21aug17_SPI_f2	SPI female	SPI	female	M.spicilegus	M.spicilegus	5sep17_21aug17_SPI_f2_sp1_30_rev.tif_Batch5
Batch5		5sep17_21aug17_SPI_f2_sp1_19_rev.tif	4601-26897-4941.tif	2	20	33	no		0	0	5sep17_21aug17_SPI_f2_sp1_19_rev.tif	21aug17_SPI_f2	SPI female	SPI	female	M.spicilegus	M.spicilegus	5sep17_21aug17_SPI_f2_sp1_19_rev.tif_Batch5
Batch5		5sep17_21aug17_SPI_f2_sp1_5.2_rev.tif	6437-12389-27118.tif	2	20	37	no		0	0	5sep17_21aug17_SPI_f2_sp1_5.2_rev.tif	21aug17_SPI_f2	SPI female	SPI	female	M.spicilegus	M.spicilegus	5sep17_21aug17_SPI_f2_sp1_5.2_rev.tif_Batch5
Batch5		5sep17_21aug17_SPI_f2_sp1_37_rev.tif	18835-12285-15209.tif	2	20	30	no		1	0	5sep17_21aug17_SPI_f2_sp1_37_rev.tif	21aug17_SPI_f2	SPI female	SPI	female	M.spicilegus	M.spicilegus	5sep17_21aug17_SPI_f2_sp1_37_rev.tif_Batch5
batch8		27dec17_4dec17_SPI_f1_sp1_24_rev.tif	13133-29245-21218.tif	2	20	28	n		0	0	27dec17_4dec17_SPI_f1_sp1_24_rev.tif	4dec17_SPI_f1	SPI female	SPI	female	M.spicilegus	M.spicilegus	27dec17_4dec17_SPI_f1_sp1_24_rev.tif_batch8
batch8		29dec17_4dec17_SPI_f2_sp1_40_rev.tif	15292-872-14686.tif	2	20	35	no		0	0	29dec17_4dec17_SPI_f2_sp1_40_rev.tif	4dec17_SPI_f2	SPI female	SPI	female	M.spicilegus	M.spicilegus	29dec17_4dec17_SPI_f2_sp1_40_rev.tif_batch8
batch8		27dec17_4dec17_SPI_f1_sp1_37_rev.tif	15811-29893-23546.tif	2	20	29	no		0	2	27dec17_4dec17_SPI_f1_sp1_37_rev.tif	4dec17_SPI_f1	SPI female	SPI	female	M.spicilegus	M.spicilegus	27dec17_4dec17_SPI_f1_sp1_37_rev.tif_batch8
batch8		29dec17_4dec17_SPI_f2_sp1_17_rev.tif	16261-27578-13212.tif	2	20	31	no		0	5	29dec17_4dec17_SPI_f2_sp1_17_rev.tif	4dec17_SPI_f2	SPI female	SPI	female	M.spicilegus	M.spicilegus	29dec17_4dec17_SPI_f2_sp1_17_rev.tif_batch8
batch8		5sep17_21aug17_SPI_f2_sp1_11_rev.tif	17908-2541-16181.tif	2	20	28	no		0	0	5sep17_21aug17_SPI_f2_sp1_11_rev.tif	21aug17_SPI_f2	SPI female	SPI	female	M.spicilegus	M.spicilegus	5sep17_21aug17_SPI_f2_sp1_11_rev.tif_batch8
batch8		29dec17_4dec17_SPI_f2_sp1_34_rev.tif	20693-23799-18307.tif	2	20	28	no		0	5	29dec17_4dec17_SPI_f2_sp1_34_rev.tif	4dec17_SPI_f2	SPI female	SPI	female	M.spicilegus	M.spicilegus	29dec17_4dec17_SPI_f2_sp1_34_rev.tif_batch8
batch8		27dec17_4dec17_SPI_f1_sp1_5_rev.tif	21590-28499-29504.tif	2	20	24	no		0	0	27dec17_4dec17_SPI_f1_sp1_5_rev.tif	4dec17_SPI_f1	SPI female	SPI	female	M.spicilegus	M.spicilegus	27dec17_4dec17_SPI_f1_sp1_5_rev.tif_batch8
batch8		29dec17_4dec17_SPI_f2_sp1_3_rev.tif	22979-11604-4869.tif	2	20	32	n		0	0	29dec17_4dec17_SPI_f2_sp1_3_rev.tif	4dec17_SPI_f2	SPI female	SPI	female	M.spicilegus	M.spicilegus	29dec17_4dec17_SPI_f2_sp1_3_rev.tif_batch8
batch8		29dec17_4dec17_SPI_f2_sp1_38_rev.tif	2675-20702-32568.tif	2	20	34	n		0	0	29dec17_4dec17_SPI_f2_sp1_38_rev.tif	4dec17_SPI_f2	SPI female	SPI	female	M.spicilegus	M.spicilegus	29dec17_4dec17_SPI_f2_sp1_38_rev.tif_batch8
batch8		27dec17_4dec17_SPI_f1_sp1_35_rev.tif	6741-20855-28493.tif	2	20	27	no		0	0	27dec17_4dec17_SPI_f1_sp1_35_rev.tif	4dec17_SPI_f1	SPI female	SPI	female	M.spicilegus	M.spicilegus	27dec17_4dec17_SPI_f1_sp1_35_rev.tif_batch8
batch8		29dec17_4dec17_SPI_f2_sp1_6_rev.tif	6968-10106-17605.tif	2	20	33	no		0	0	29dec17_4dec17_SPI_f2_sp1_6_rev.tif	4dec17_SPI_f2	SPI female	SPI	female	M.spicilegus	M.spicilegus	29dec17_4dec17_SPI_f2_sp1_6_rev.tif_batch8
batch8		27dec17_4dec17_SPI_f1_sp1_23_rev.tif	9868-3036-19173.tif	2	20	32	no		0	0	27dec17_4dec17_SPI_f1_sp1_23_rev.tif	4dec17_SPI_f1	SPI female	SPI	female	M.spicilegus	M.spicilegus	27dec17_4dec17_SPI_f1_sp1_23_rev.tif_batch8
batch8		29dec17_4dec17_SPI_f2_sp1_32_rev.tif	1040-28336-316.tif	2	20	32	no		1	0	29dec17_4dec17_SPI_f2_sp1_32_rev.tif	4dec17_SPI_f2	SPI female	SPI	female	M.spicilegus	M.spicilegus	29dec17_4dec17_SPI_f2_sp1_32_rev.tif_batch8
batch8		29dec17_4dec17_SPI_f2_sp1_2_rev.tif	15326-13692-20286.tif	2	20	31	no		1	0	29dec17_4dec17_SPI_f2_sp1_2_rev.tif	4dec17_SPI_f2	SPI female	SPI	female	M.spicilegus	M.spicilegus	29dec17_4dec17_SPI_f2_sp1_2_rev.tif_batch8
batch8		29dec17_4dec17_SPI_f2_sp1_18_rev.tif	1575-8423-9906.tif	2	20	25	no		1	1	29dec17_4dec17_SPI_f2_sp1_18_rev.tif	4dec17_SPI_f2	SPI female	SPI	female	M.spicilegus	M.spicilegus	29dec17_4dec17_SPI_f2_sp1_18_rev.tif_batch8
batch8		27dec17_4dec17_SPI_f1_sp1_20_rev.tif	20056-21589-24110.tif	2	20	27	no		1	0	27dec17_4dec17_SPI_f1_sp1_20_rev.tif	4dec17_SPI_f1	SPI female	SPI	female	M.spicilegus	M.spicilegus	27dec17_4dec17_SPI_f1_sp1_20_rev.tif_batch8
batch8		27dec17_4dec17_SPI_f1_sp1_28_rev.tif	10331-28467-8279.tif	2	20	22	no		2	0	27dec17_4dec17_SPI_f1_sp1_28_rev.tif	4dec17_SPI_f1	SPI female	SPI	female	M.spicilegus	M.spicilegus	27dec17_4dec17_SPI_f1_sp1_28_rev.tif_batch8
batch8		29dec17_4dec17_SPI_f2_sp1_19_rev.tif	11166-20642-8755.tif	2	20	26	no		2	1	29dec17_4dec17_SPI_f2_sp1_19_rev.tif	4dec17_SPI_f2	SPI female	SPI	female	M.spicilegus	M.spicilegus	29dec17_4dec17_SPI_f2_sp1_19_rev.tif_batch8
batch8		5sep17_21aug17_SPI_f2_sp1_39_rev.tif	14886-30384-19982.tif	2	20	21	no		2	0	5sep17_21aug17_SPI_f2_sp1_39_rev.tif	21aug17_SPI_f2	SPI female	SPI	female	M.spicilegus	M.spicilegus	5sep17_21aug17_SPI_f2_sp1_39_rev.tif_batch8
batch8		29dec17_4dec17_SPI_f2_sp1_33_rev.tif	16644-3927-24459.tif	2	20	25	no		2	0	29dec17_4dec17_SPI_f2_sp1_33_rev.tif	4dec17_SPI_f2	SPI female	SPI	female	M.spicilegus	M.spicilegus	29dec17_4dec17_SPI_f2_sp1_33_rev.tif_batch8
batch8		5sep17_21aug17_SPI_f2_sp1_41_rev.tif	23332-8663-7404.tif	2	20	27	no		2	0	5sep17_21aug17_SPI_f2_sp1_41_rev.tif	21aug17_SPI_f2	SPI female	SPI	female	M.spicilegus	M.spicilegus	5sep17_21aug17_SPI_f2_sp1_41_rev.tif_batch8
batch8		27dec17_4dec17_SPI_f1_sp1_4_rev.tif	3028-18469-1556.tif	2	20	21	no		2	2	27dec17_4dec17_SPI_f1_sp1_4_rev.tif	4dec17_SPI_f1	SPI female	SPI	female	M.spicilegus	M.spicilegus	27dec17_4dec17_SPI_f1_sp1_4_rev.tif_batch8
batch8		29dec17_4dec17_SPI_f2_sp1_5_rev.tif	6480-17394-32459.tif	2	20	22	no		2	3	29dec17_4dec17_SPI_f2_sp1_5_rev.tif	4dec17_SPI_f2	SPI female	SPI	female	M.spicilegus	M.spicilegus	29dec17_4dec17_SPI_f2_sp1_5_rev.tif_batch8
Batch14		4feb18_31dec17_SPI_f1_sp1_22_rev.tif	18038-22174-16076.tif	2	20	22	no		1	0	4feb18_31dec17_SPI_f1_sp1_22_rev.tif	31dec17_SPI_f1	SPI female	SPI	female	M.spicilegus	M.spicilegus	4feb18_31dec17_SPI_f1_sp1_22_rev.tif_Batch14
Batch14		4feb18_31dec17_SPI_f1_sp1_10_rev.tif	1587-16586-12465.tif	2	20	26	no		1	0	4feb18_31dec17_SPI_f1_sp1_10_rev.tif	31dec17_SPI_f1	SPI female	SPI	female	M.spicilegus	M.spicilegus	4feb18_31dec17_SPI_f1_sp1_10_rev.tif_Batch14
Batch14		26sep18_30may18_SPI_f4_sp1_9_rev.tif	1470-21385-20193.tif	2	20	29	no		0	0	26sep18_30may18_SPI_f4_sp1_9_rev.tif	30may18_SPI_f4	SPI female	SPI	female	M.spicilegus	M.spicilegus	26sep18_30may18_SPI_f4_sp1_9_rev.tif_Batch14
Batch14		26sep18_30may18_SPI_f4_sp1_5_rev.tif	7237-17694-17355.tif	2	20	29	no		0	0	26sep18_30may18_SPI_f4_sp1_5_rev.tif	30may18_SPI_f4	SPI female	SPI	female	M.spicilegus	M.spicilegus	26sep18_30may18_SPI_f4_sp1_5_rev.tif_Batch14
Batch14		26sep18_30may18_SPI_f4_sp1_3_rev.tif	6229-15909-20267.tif	2	20	34	no		0	0	26sep18_30may18_SPI_f4_sp1_3_rev.tif	30may18_SPI_f4	SPI female	SPI	female	M.spicilegus	M.spicilegus	26sep18_30may18_SPI_f4_sp1_3_rev.tif_Batch14
Batch14		26sep18_30may18_SPI_f4_sp1_23_rev.tif	8737-4600-18543.tif	2	20	32	no		0	1	26sep18_30may18_SPI_f4_sp1_23_rev.tif	30may18_SPI_f4	SPI female	SPI	female	M.spicilegus	M.spicilegus	26sep18_30may18_SPI_f4_sp1_23_rev.tif_Batch14
Batch7		26dec17_4dec17_SPI_m1_sp1_5_rev.tif	29266-17471-17899.tif	2	20	22	n	y	0	0	26dec17_4dec17_SPI_m1_sp1_5_rev.tif	4dec17_SPI_m1	SPI male	SPI	male	M.spicilegus	M.spicilegus	26dec17_4dec17_SPI_m1_sp1_5_rev.tif_Batch7
Batch7		26dec17_4dec17_SPI_m1_sp1_34_rev.tif	3319-7742-30577.tif	2	20	23	yes	yes	0	0	26dec17_4dec17_SPI_m1_sp1_34_rev.tif	4dec17_SPI_m1	SPI male	SPI	male	M.spicilegus	M.spicilegus	26dec17_4dec17_SPI_m1_sp1_34_rev.tif_Batch7
Batch7		26dec17_4dec17_SPI_m1_sp1_38.3_rev.tif	30824-11855-13204.tif	2	20	24	no	yes	0	0	26dec17_4dec17_SPI_m1_sp1_38.3_rev.tif	4dec17_SPI_m1	SPI male	SPI	male	M.spicilegus	M.spicilegus	26dec17_4dec17_SPI_m1_sp1_38.3_rev.tif_Batch7
Batch7		26dec17_4dec17_SPI_m1_sp1_28_rev.tif	4915-12432-16253.tif	2	20	24	no	yes	0	1	26dec17_4dec17_SPI_m1_sp1_28_rev.tif	4dec17_SPI_m1	SPI male	SPI	male	M.spicilegus	M.spicilegus	26dec17_4dec17_SPI_m1_sp1_28_rev.tif_Batch7
Batch7		26dec17_4dec17_SPI_m1_sp1_19_rev.tif	27242-6842-12338.tif	2	20	24	n	y	0	0	26dec17_4dec17_SPI_m1_sp1_19_rev.tif	4dec17_SPI_m1	SPI male	SPI	male	M.spicilegus	M.spicilegus	26dec17_4dec17_SPI_m1_sp1_19_rev.tif_Batch7
Batch7		26dec17_4dec17_SPI_m1_sp1_14_rev.tif	13184-4967-22714.tif	2	20	24	n	y	0	0	26dec17_4dec17_SPI_m1_sp1_14_rev.tif	4dec17_SPI_m1	SPI male	SPI	male	M.spicilegus	M.spicilegus	26dec17_4dec17_SPI_m1_sp1_14_rev.tif_Batch7
Batch7		4dec17_7nov17_SPI_m1_sp1_2.4_rev.tif	9731-26383-17264.tif	2	20	24	yes	n	0	0	4dec17_7nov17_SPI_m1_sp1_2.4_rev.tif	7nov17_SPI_m1	SPI male	SPI	male	M.spicilegus	M.spicilegus	4dec17_7nov17_SPI_m1_sp1_2.4_rev.tif_Batch7
Batch7		26dec17_4dec17_SPI_m1_sp1_36.2_rev.tif	8338-2504-12681.tif	2	20	25	no	yes	1	0	26dec17_4dec17_SPI_m1_sp1_36.2_rev.tif	4dec17_SPI_m1	SPI male	SPI	male	M.spicilegus	M.spicilegus	26dec17_4dec17_SPI_m1_sp1_36.2_rev.tif_Batch7
Batch7		26dec17_4dec17_SPI_m1_sp1_38.2_rev.tif	9566-28799-901.tif	2	20	25	no	yes	0	0	26dec17_4dec17_SPI_m1_sp1_38.2_rev.tif	4dec17_SPI_m1	SPI male	SPI	male	M.spicilegus	M.spicilegus	26dec17_4dec17_SPI_m1_sp1_38.2_rev.tif_Batch7
Batch7		4dec17_7nov17_SPI_m1_sp1_11_rev.tif	3687-24389-25509.tif	2	20	25	yes		0	0	4dec17_7nov17_SPI_m1_sp1_11_rev.tif	7nov17_SPI_m1	SPI male	SPI	male	M.spicilegus	M.spicilegus	4dec17_7nov17_SPI_m1_sp1_11_rev.tif_Batch7
Batch7		26dec17_4dec17_SPI_m1_sp1_38.1_rev.tif	6919-15550-1796.tif	2	20	25	no	yes	0	0	26dec17_4dec17_SPI_m1_sp1_38.1_rev.tif	4dec17_SPI_m1	SPI male	SPI	male	M.spicilegus	M.spicilegus	26dec17_4dec17_SPI_m1_sp1_38.1_rev.tif_Batch7
Batch7		26dec17_4dec17_SPI_m1_sp1_3_rev.tif	16579-19568-12588.tif	2	20	25	n	y	1	0	26dec17_4dec17_SPI_m1_sp1_3_rev.tif	4dec17_SPI_m1	SPI male	SPI	male	M.spicilegus	M.spicilegus	26dec17_4dec17_SPI_m1_sp1_3_rev.tif_Batch7
Batch7		4dec17_7nov17_SPI_m1_sp1_31.1_rev.tif	16654-9912-11863.tif	2	20	26	n	y	0	0	4dec17_7nov17_SPI_m1_sp1_31.1_rev.tif	7nov17_SPI_m1	SPI male	SPI	male	M.spicilegus	M.spicilegus	4dec17_7nov17_SPI_m1_sp1_31.1_rev.tif_Batch7
Batch7		4dec17_7nov17_SPI_m1_sp1_24_rev.tif	17495-12330-30829.tif	2	20	26	n	yes	0	1	4dec17_7nov17_SPI_m1_sp1_24_rev.tif	7nov17_SPI_m1	SPI male	SPI	male	M.spicilegus	M.spicilegus	4dec17_7nov17_SPI_m1_sp1_24_rev.tif_Batch7
Batch7		4dec17_7nov17_SPI_m1_sp1_3_rev.tif	8598-8185-29021.tif	2	20	26	no	yes	0	0	4dec17_7nov17_SPI_m1_sp1_3_rev.tif	7nov17_SPI_m1	SPI male	SPI	male	M.spicilegus	M.spicilegus	4dec17_7nov17_SPI_m1_sp1_3_rev.tif_Batch7
Batch7		26dec17_4dec17_SPI_m1_sp1_17_rev.tif	3552-30872-19190.tif	2	20	26	yes	yes	0	0	26dec17_4dec17_SPI_m1_sp1_17_rev.tif	4dec17_SPI_m1	SPI male	SPI	male	M.spicilegus	M.spicilegus	26dec17_4dec17_SPI_m1_sp1_17_rev.tif_Batch7
Batch7		26dec17_4dec17_SPI_m1_sp1_30_rev.tif	17357-10532-7368.tif	2	20	26	n	y	0	0	26dec17_4dec17_SPI_m1_sp1_30_rev.tif	4dec17_SPI_m1	SPI male	SPI	male	M.spicilegus	M.spicilegus	26dec17_4dec17_SPI_m1_sp1_30_rev.tif_Batch7
Batch7		4dec17_7nov17_SPI_m1_sp1_13.2_rev.tif	20869-29115-21395.tif	2	20	26	n	y	0	0	4dec17_7nov17_SPI_m1_sp1_13.2_rev.tif	7nov17_SPI_m1	SPI male	SPI	male	M.spicilegus	M.spicilegus	4dec17_7nov17_SPI_m1_sp1_13.2_rev.tif_Batch7
Batch7		26dec17_4dec17_SPI_m1_sp1_31_rev.tif	9687-12775-24171.tif	2	20	26	yes	n	0	0	26dec17_4dec17_SPI_m1_sp1_31_rev.tif	4dec17_SPI_m1	SPI male	SPI	male	M.spicilegus	M.spicilegus	26dec17_4dec17_SPI_m1_sp1_31_rev.tif_Batch7
Batch7		26dec17_4dec17_SPI_m1_sp1_20_rev.tif	9381-27598-23939.tif	2	20	26	n	y	0	0	26dec17_4dec17_SPI_m1_sp1_20_rev.tif	4dec17_SPI_m1	SPI male	SPI	male	M.spicilegus	M.spicilegus	26dec17_4dec17_SPI_m1_sp1_20_rev.tif_Batch7
Batch7		26dec17_4dec17_SPI_m1_sp1_27_rev.tif	5225-23946-25898.tif	2	20	27	no	yes	0	0	26dec17_4dec17_SPI_m1_sp1_27_rev.tif	4dec17_SPI_m1	SPI male	SPI	male	M.spicilegus	M.spicilegus	26dec17_4dec17_SPI_m1_sp1_27_rev.tif_Batch7
Batch7		4dec17_7nov17_SPI_m1_sp1_1.1_rev.tif	7172-3776-21848.tif	2	20	27	yes		0	0	4dec17_7nov17_SPI_m1_sp1_1.1_rev.tif	7nov17_SPI_m1	SPI male	SPI	male	M.spicilegus	M.spicilegus	4dec17_7nov17_SPI_m1_sp1_1.1_rev.tif_Batch7
Batch7		26dec17_4dec17_SPI_m1_sp1_35.1_rev.tif	25778-4751-18309.tif	2	20	27	n	y	0	0	26dec17_4dec17_SPI_m1_sp1_35.1_rev.tif	4dec17_SPI_m1	SPI male	SPI	male	M.spicilegus	M.spicilegus	26dec17_4dec17_SPI_m1_sp1_35.1_rev.tif_Batch7
Batch7		4dec17_7nov17_SPI_m1_sp1_15.1_rev.tif	18247-29163-22406.tif	2	20	27	n	y	0	0	4dec17_7nov17_SPI_m1_sp1_15.1_rev.tif	7nov17_SPI_m1	SPI male	SPI	male	M.spicilegus	M.spicilegus	4dec17_7nov17_SPI_m1_sp1_15.1_rev.tif_Batch7
Batch7		4dec17_7nov17_SPI_m1_sp1_20_rev.tif	9836-20748-25245.tif	2	20	27	n	y	1	0	4dec17_7nov17_SPI_m1_sp1_20_rev.tif	7nov17_SPI_m1	SPI male	SPI	male	M.spicilegus	M.spicilegus	4dec17_7nov17_SPI_m1_sp1_20_rev.tif_Batch7
Batch7		4dec17_7nov17_SPI_m1_sp1_32_rev.tif	19568-31434-17499.tif	2	20	28	n	y	0	0	4dec17_7nov17_SPI_m1_sp1_32_rev.tif	7nov17_SPI_m1	SPI male	SPI	male	M.spicilegus	M.spicilegus	4dec17_7nov17_SPI_m1_sp1_32_rev.tif_Batch7
Batch7		26dec17_4dec17_SPI_m1_sp1_36.1_rev.tif	220-95-1037.tif	2	20	28	yes	yes	0	0	26dec17_4dec17_SPI_m1_sp1_36.1_rev.tif	4dec17_SPI_m1	SPI male	SPI	male	M.spicilegus	M.spicilegus	26dec17_4dec17_SPI_m1_sp1_36.1_rev.tif_Batch7
Batch7		4dec17_7nov17_SPI_m1_sp1_30.1_rev.tif	29312-26609-6693.tif	2	20	28	yes	yes	0	0	4dec17_7nov17_SPI_m1_sp1_30.1_rev.tif	7nov17_SPI_m1	SPI male	SPI	male	M.spicilegus	M.spicilegus	4dec17_7nov17_SPI_m1_sp1_30.1_rev.tif_Batch7
Batch7		26dec17_4dec17_SPI_m1_sp1_29_rev.tif	1365-9446-22555.tif	2	20	28	no	yes	0	0	26dec17_4dec17_SPI_m1_sp1_29_rev.tif	4dec17_SPI_m1	SPI male	SPI	male	M.spicilegus	M.spicilegus	26dec17_4dec17_SPI_m1_sp1_29_rev.tif_Batch7
Batch7		4dec17_7nov17_SPI_m1_sp1_8.1_rev.tif	31728-22527-48.tif	2	20	28	no	yes	1	0	4dec17_7nov17_SPI_m1_sp1_8.1_rev.tif	7nov17_SPI_m1	SPI male	SPI	male	M.spicilegus	M.spicilegus	4dec17_7nov17_SPI_m1_sp1_8.1_rev.tif_Batch7
Batch7		26dec17_4dec17_SPI_m1_sp1_16.2_rev.tif	5479-28610-4014.tif	2	20	28	no	yes	0	0	26dec17_4dec17_SPI_m1_sp1_16.2_rev.tif	4dec17_SPI_m1	SPI male	SPI	male	M.spicilegus	M.spicilegus	26dec17_4dec17_SPI_m1_sp1_16.2_rev.tif_Batch7
Batch7		4dec17_7nov17_SPI_m1_sp1_23_rev.tif	16811-24347-1282.tif	2	20	28	n	y	0	0	4dec17_7nov17_SPI_m1_sp1_23_rev.tif	7nov17_SPI_m1	SPI male	SPI	male	M.spicilegus	M.spicilegus	4dec17_7nov17_SPI_m1_sp1_23_rev.tif_Batch7
Batch7		4dec17_7nov17_SPI_m1_sp1_22_rev.tif	20828-6939-25148.tif	2	20	28	yes	y	1	0	4dec17_7nov17_SPI_m1_sp1_22_rev.tif	7nov17_SPI_m1	SPI male	SPI	male	M.spicilegus	M.spicilegus	4dec17_7nov17_SPI_m1_sp1_22_rev.tif_Batch7
Batch7		4dec17_7nov17_SPI_m1_sp1_6_rev.tif	22354-21343-27424.tif	2	20	29	n	y	0	0	4dec17_7nov17_SPI_m1_sp1_6_rev.tif	7nov17_SPI_m1	SPI male	SPI	male	M.spicilegus	M.spicilegus	4dec17_7nov17_SPI_m1_sp1_6_rev.tif_Batch7
Batch7		26dec17_4dec17_SPI_m1_sp1_41.2_rev.tif	18529-24847-27414.tif	2	20	29	n	y	0	0	26dec17_4dec17_SPI_m1_sp1_41.2_rev.tif	4dec17_SPI_m1	SPI male	SPI	male	M.spicilegus	M.spicilegus	26dec17_4dec17_SPI_m1_sp1_41.2_rev.tif_Batch7
Batch7		4dec17_7nov17_SPI_m1_sp1_30.2_rev.tif	28961-29649-9093.tif	2	20	30	no	yes	0	0	4dec17_7nov17_SPI_m1_sp1_30.2_rev.tif	7nov17_SPI_m1	SPI male	SPI	male	M.spicilegus	M.spicilegus	4dec17_7nov17_SPI_m1_sp1_30.2_rev.tif_Batch7
Batch7		4dec17_7nov17_SPI_m1_sp1_21_rev.tif	5388-13838-8452.tif	2	20	30	no	yes	0	0	4dec17_7nov17_SPI_m1_sp1_21_rev.tif	7nov17_SPI_m1	SPI male	SPI	male	M.spicilegus	M.spicilegus	4dec17_7nov17_SPI_m1_sp1_21_rev.tif_Batch7
Batch7		4dec17_7nov17_SPI_m1_sp1_16.3_rev.tif	6975-648-20179.tif	2	20	30	no	yes	0	0	4dec17_7nov17_SPI_m1_sp1_16.3_rev.tif	7nov17_SPI_m1	SPI male	SPI	male	M.spicilegus	M.spicilegus	4dec17_7nov17_SPI_m1_sp1_16.3_rev.tif_Batch7
Batch7		26dec17_4dec17_SPI_m1_sp1_37_rev.tif	28939-11107-31278.tif	2	20	30	n	y	0	0	26dec17_4dec17_SPI_m1_sp1_37_rev.tif	4dec17_SPI_m1	SPI male	SPI	male	M.spicilegus	M.spicilegus	26dec17_4dec17_SPI_m1_sp1_37_rev.tif_Batch7
Batch7		4dec17_7nov17_SPI_m1_sp1_9.1_rev.tif	4025-9834-29432.tif	2	20	31	no	yes	0	0	4dec17_7nov17_SPI_m1_sp1_9.1_rev.tif	7nov17_SPI_m1	SPI male	SPI	male	M.spicilegus	M.spicilegus	4dec17_7nov17_SPI_m1_sp1_9.1_rev.tif_Batch7
Batch15		26sep18_19may18_SPI_m2_sp1_20_rev.tif	26784-12891-3652.tif	2	20	20	yes	yes	2	0	26sep18_19may18_SPI_m2_sp1_20_rev.tif	19may18_SPI_m2	SPI male	SPI	male	M.spicilegus	M.spicilegus	26sep18_19may18_SPI_m2_sp1_20_rev.tif_Batch15
Batch15		6jun19_28jun18_SPI_m2_sp1_6.2_rev.tif	21834-30293-25857.tif	2	20	21	no	no	0	0	6jun19_28jun18_SPI_m2_sp1_6.2_rev.tif	28jun18_SPI_m2	SPI male	SPI	male	M.spicilegus	M.spicilegus	6jun19_28jun18_SPI_m2_sp1_6.2_rev.tif_Batch15
Batch15		26sep18_19may18_SPI_m2_sp1_8_rev.tif	14839-25001-24204.tif	2	20	22	no	yes	2	0	26sep18_19may18_SPI_m2_sp1_8_rev.tif	19may18_SPI_m2	SPI male	SPI	male	M.spicilegus	M.spicilegus	26sep18_19may18_SPI_m2_sp1_8_rev.tif_Batch15
Batch15		6jun19_28jun18_SPI_m2_sp1_8.2_rev.tif	10970-14532-15559.tif	2	20	24	no	yes	2	0	6jun19_28jun18_SPI_m2_sp1_8.2_rev.tif	28jun18_SPI_m2	SPI male	SPI	male	M.spicilegus	M.spicilegus	6jun19_28jun18_SPI_m2_sp1_8.2_rev.tif_Batch15
Batch15		26sep18_19may18_SPI_m2_sp1_22_rev.tif	31440-24899-23297.tif	2	20	26	no	yes	0	0	26sep18_19may18_SPI_m2_sp1_22_rev.tif	19may18_SPI_m2	SPI male	SPI	male	M.spicilegus	M.spicilegus	26sep18_19may18_SPI_m2_sp1_22_rev.tif_Batch15
Batch15		26sep18_19may18_SPI_m2_sp1_15.1_rev.tif	24741-7553-11016.tif	2	20	27	no	yes	1	0	26sep18_19may18_SPI_m2_sp1_15.1_rev.tif	19may18_SPI_m2	SPI male	SPI	male	M.spicilegus	M.spicilegus	26sep18_19may18_SPI_m2_sp1_15.1_rev.tif_Batch15
Batch15		26sep18_19may18_SPI_m2_sp1_21_rev.tif	3436-23739-14374.tif	2	20	27	no	yes	0	0	26sep18_19may18_SPI_m2_sp1_21_rev.tif	19may18_SPI_m2	SPI male	SPI	male	M.spicilegus	M.spicilegus	26sep18_19may18_SPI_m2_sp1_21_rev.tif_Batch15
Batch15		26sep18_19may18_SPI_m2_sp1_18_rev.tif	26034-21697-7630.tif	2	20	29	no	yes	0	0	26sep18_19may18_SPI_m2_sp1_18_rev.tif	19may18_SPI_m2	SPI male	SPI	male	M.spicilegus	M.spicilegus	26sep18_19may18_SPI_m2_sp1_18_rev.tif_Batch15
Batch5		5aug17_14jul17_SPRET_f3_sp1_9_rev.tif	2024-17836-19141.tif	2	20	40	no		0	0	5aug17_14jul17_SPRET_f3_sp1_9_rev.tif	14jul17_SPRET_f3	SPRET female	SPRET	female	M.spretus	M.spretus	5aug17_14jul17_SPRET_f3_sp1_9_rev.tif_Batch5
Batch5		5aug17_14jul17_SPRET_f3_sp1_8_rev.tif	24237-14018-8069.tif	2	20	23	no		2	0	5aug17_14jul17_SPRET_f3_sp1_8_rev.tif	14jul17_SPRET_f3	SPRET female	SPRET	female	M.spretus	M.spretus	5aug17_14jul17_SPRET_f3_sp1_8_rev.tif_Batch5
Batch6		24may17_8may17_SPRET_m1_sp1_7_rev.tif	27106-13682-20694.tif	2	20	19	no		3	0	24may17_8may17_SPRET_m1_sp1_7_rev.tif	8may17_SPRET_m1	SPRET male	SPRET	male	M.spretus	M.spretus	24may17_8may17_SPRET_m1_sp1_7_rev.tif_Batch6
Batch6		24may17_8may17_SPRET_m1_sp1_39_rev.tif	12323-5440-30359.tif	2	20	23	no		0	0	24may17_8may17_SPRET_m1_sp1_39_rev.tif	8may17_SPRET_m1	SPRET male	SPRET	male	M.spretus	M.spretus	24may17_8may17_SPRET_m1_sp1_39_rev.tif_Batch6
Batch6		24may17_8may17_SPRET_m1_sp1_6_rev.tif	5969-28353-9800.tif	2	20	23	no		1	0	24may17_8may17_SPRET_m1_sp1_6_rev.tif	8may17_SPRET_m1	SPRET male	SPRET	male	M.spretus	M.spretus	24may17_8may17_SPRET_m1_sp1_6_rev.tif_Batch6
Batch6		24may17_8may17_SPRET_m1_sp1_9_rev.tif	10907-24669-20787.tif	2	20	25	no		0	0	24may17_8may17_SPRET_m1_sp1_9_rev.tif	8may17_SPRET_m1	SPRET male	SPRET	male	M.spretus	M.spretus	24may17_8may17_SPRET_m1_sp1_9_rev.tif_Batch6
Batch6		24may17_8may17_SPRET_m1_sp1_22_rev.tif	21530-22510-15976.tif	2	20	25	no		0	0	24may17_8may17_SPRET_m1_sp1_22_rev.tif	8may17_SPRET_m1	SPRET male	SPRET	male	M.spretus	M.spretus	24may17_8may17_SPRET_m1_sp1_22_rev.tif_Batch6
Batch6		24may17_8may17_SPRET_m1_sp1_31_rev.tif	3186-21969-2642.tif	2	20	25	no		0	0	24may17_8may17_SPRET_m1_sp1_31_rev.tif	8may17_SPRET_m1	SPRET male	SPRET	male	M.spretus	M.spretus	24may17_8may17_SPRET_m1_sp1_31_rev.tif_Batch6
Batch6		24may17_8may17_SPRET_m1_sp1_37_rev.tif	14333-5697-13704.tif	2	20	26	no		0	0	24may17_8may17_SPRET_m1_sp1_37_rev.tif	8may17_SPRET_m1	SPRET male	SPRET	male	M.spretus	M.spretus	24may17_8may17_SPRET_m1_sp1_37_rev.tif_Batch6
Batch6		24may17_8may17_SPRET_m1_sp1_30_rev.tif	14549-29970-3713.tif	2	20	27	no		0	0	24may17_8may17_SPRET_m1_sp1_30_rev.tif	8may17_SPRET_m1	SPRET male	SPRET	male	M.spretus	M.spretus	24may17_8may17_SPRET_m1_sp1_30_rev.tif_Batch6
Batch6		24may17_8may17_SPRET_m1_sp1_23_rev.tif	4038-15675-96.tif	2	20	27	no		0	0	24may17_8may17_SPRET_m1_sp1_23_rev.tif	8may17_SPRET_m1	SPRET male	SPRET	male	M.spretus	M.spretus	24may17_8may17_SPRET_m1_sp1_23_rev.tif_Batch6
Batch6		24may17_8may17_SPRET_m1_sp1_18_rev.tif	202-8491-28171.tif	2	20	28	no		0	0	24may17_8may17_SPRET_m1_sp1_18_rev.tif	8may17_SPRET_m1	SPRET male	SPRET	male	M.spretus	M.spretus	24may17_8may17_SPRET_m1_sp1_18_rev.tif_Batch6
Batch6		24may17_8may17_SPRET_m1_sp1_11_rev.tif	3023-1862-12010.tif	2	20	28	no		0	0	24may17_8may17_SPRET_m1_sp1_11_rev.tif	8may17_SPRET_m1	SPRET male	SPRET	male	M.spretus	M.spretus	24may17_8may17_SPRET_m1_sp1_11_rev.tif_Batch6
Batch6		24may17_8may17_SPRET_m1_sp1_21.1_rev.tif	24316-376-8361.tif	2	20	30	no		0	0	24may17_8may17_SPRET_m1_sp1_21.1_rev.tif	8may17_SPRET_m1	SPRET male	SPRET	male	M.spretus	M.spretus	24may17_8may17_SPRET_m1_sp1_21.1_rev.tif_Batch6
Batch7		10oct17_5jul17_SPRET_m1_sp1_24_rev.tif	2040-19830-14881.tif	2	20	22	no	yes	1	0	10oct17_5jul17_SPRET_m1_sp1_24_rev.tif	5jul17_SPRET_m1	SPRET male	SPRET	male	M.spretus	M.spretus	10oct17_5jul17_SPRET_m1_sp1_24_rev.tif_Batch7
Batch7		10oct17_5jul17_SPRET_m1_sp1_25.2rev.tif	8413-6566-29774.tif	2	20	24	n	y	1	0	10oct17_5jul17_SPRET_m1_sp1_25.2rev.tif	5jul17_SPRET_m1	SPRET male	SPRET	male	M.spretus	M.spretus	10oct17_5jul17_SPRET_m1_sp1_25.2rev.tif_Batch7
Batch7		10oct17_5jul17_SPRET_m1_sp1_21_rev.tif	32659-28954-24738.tif	2	20	25	n	yes	0	0	10oct17_5jul17_SPRET_m1_sp1_21_rev.tif	5jul17_SPRET_m1	SPRET male	SPRET	male	M.spretus	M.spretus	10oct17_5jul17_SPRET_m1_sp1_21_rev.tif_Batch7
Batch7		10oct17_5jul17_SPRET_m1_sp1_26_rev.tif	25538-27596-4711.tif	2	20	29	n	y	0	0	10oct17_5jul17_SPRET_m1_sp1_26_rev.tif	5jul17_SPRET_m1	SPRET male	SPRET	male	M.spretus	M.spretus	10oct17_5jul17_SPRET_m1_sp1_26_rev.tif_Batch7
Batch11		9mar18_13oct17_SPRET_m1_sp1_16_rev.tif	30917-6217-19155.tif	2	20	19	no	yes	2	0	9mar18_13oct17_SPRET_m1_sp1_16_rev.tif	13oct17_SPRET_m1	SPRET male	SPRET	male	M.spretus	M.spretus	9mar18_13oct17_SPRET_m1_sp1_16_rev.tif_Batch11
Batch11		9mar18_13oct17_SPRET_m1_sp1_25.2_rev.tif	18309-5400-5403.tif	2	20	20	no	yes	1	0	9mar18_13oct17_SPRET_m1_sp1_25.2_rev.tif	13oct17_SPRET_m1	SPRET male	SPRET	male	M.spretus	M.spretus	9mar18_13oct17_SPRET_m1_sp1_25.2_rev.tif_Batch11
Batch11		9mar18_13oct17_SPRET_m1_sp1_11_rev.tif	23517-26871-2367.tif	2	20	22	no	yes	0	0	9mar18_13oct17_SPRET_m1_sp1_11_rev.tif	13oct17_SPRET_m1	SPRET male	SPRET	male	M.spretus	M.spretus	9mar18_13oct17_SPRET_m1_sp1_11_rev.tif_Batch11
Batch11		9mar18_13oct17_SPRET_m1_sp1_3.2_rev.tif	4765-8235-5174.tif	2	20	22	no	yes	1	0	9mar18_13oct17_SPRET_m1_sp1_3.2_rev.tif	13oct17_SPRET_m1	SPRET male	SPRET	male	M.spretus	M.spretus	9mar18_13oct17_SPRET_m1_sp1_3.2_rev.tif_Batch11
Batch11		28jul17_30may17_SPRET_m1_sp1_4.2_rev.tif	12398-16603-24791.tif	2	20	22	no	yes	2	0	28jul17_30may17_SPRET_m1_sp1_4.2_rev.tif	30may17_SPRET_m1	SPRET male	SPRET	male	M.spretus	M.spretus	28jul17_30may17_SPRET_m1_sp1_4.2_rev.tif_Batch11
Batch11		9mar18_13oct17_SPRET_m1_sp1_22_rev.tif	4568-8670-7118.tif	2	20	23	no	yes	0	0	9mar18_13oct17_SPRET_m1_sp1_22_rev.tif	13oct17_SPRET_m1	SPRET male	SPRET	male	M.spretus	M.spretus	9mar18_13oct17_SPRET_m1_sp1_22_rev.tif_Batch11
Batch11		14jun18_11jan18_SPRET_m1_sp1_6_rev.tif	19572-2282-30777.tif	2	20	23	no	yes	1	0	14jun18_11jan18_SPRET_m1_sp1_6_rev.tif	11jan18_SPRET_m1	SPRET male	SPRET	male	M.spretus	M.spretus	14jun18_11jan18_SPRET_m1_sp1_6_rev.tif_Batch11
Batch11		16mar18_11jan18_SPRET_m1_sp1_2.2_rev.tif	32219-2691-1047.tif	2	20	23	no	yes	1	0	16mar18_11jan18_SPRET_m1_sp1_2.2_rev.tif	11jan18_SPRET_m1	SPRET male	SPRET	male	M.spretus	M.spretus	16mar18_11jan18_SPRET_m1_sp1_2.2_rev.tif_Batch11
Batch11		9mar18_13oct17_SPRET_m1_sp1_18_rev.tif	14004-3657-31179.tif	2	20	24	no	yes	0	0	9mar18_13oct17_SPRET_m1_sp1_18_rev.tif	13oct17_SPRET_m1	SPRET male	SPRET	male	M.spretus	M.spretus	9mar18_13oct17_SPRET_m1_sp1_18_rev.tif_Batch11
Batch11		28jul17_30may17_SPRET_m1_sp1_6_rev.tif	19467-11305-23821.tif	2	20	24	no	yes	0	0	28jul17_30may17_SPRET_m1_sp1_6_rev.tif	30may17_SPRET_m1	SPRET male	SPRET	male	M.spretus	M.spretus	28jul17_30may17_SPRET_m1_sp1_6_rev.tif_Batch11
Batch11		16mar18_11jan18_SPRET_m1_sp1_4_rev.tif	29677-20091-20829.tif	2	20	24	no	yes	0	0	16mar18_11jan18_SPRET_m1_sp1_4_rev.tif	11jan18_SPRET_m1	SPRET male	SPRET	male	M.spretus	M.spretus	16mar18_11jan18_SPRET_m1_sp1_4_rev.tif_Batch11
Batch11		14jun18_11jan18_SPRET_m1_sp1_9_rev.tif	8-25704-14062.tif	2	20	24	no	yes	1	1	14jun18_11jan18_SPRET_m1_sp1_9_rev.tif	11jan18_SPRET_m1	SPRET male	SPRET	male	M.spretus	M.spretus	14jun18_11jan18_SPRET_m1_sp1_9_rev.tif_Batch11
Batch11		16mar18_11jan18_SPRET_m1_sp1_7_rev.tif	18688-31088-6538.tif	2	20	25	no	yes	1	0	16mar18_11jan18_SPRET_m1_sp1_7_rev.tif	11jan18_SPRET_m1	SPRET male	SPRET	male	M.spretus	M.spretus	16mar18_11jan18_SPRET_m1_sp1_7_rev.tif_Batch11
Batch11		14jun18_11jan18_SPRET_m1_sp1_25_rev.tif	7569-9589-4750.tif	2	20	25	yes	yes	0	0	14jun18_11jan18_SPRET_m1_sp1_25_rev.tif	11jan18_SPRET_m1	SPRET male	SPRET	male	M.spretus	M.spretus	14jun18_11jan18_SPRET_m1_sp1_25_rev.tif_Batch11
Batch11		14jun18_11jan18_SPRET_m1_sp1_26_rev.tif	11685-9001-25717.tif	2	20	25	no	yes	0	0	14jun18_11jan18_SPRET_m1_sp1_26_rev.tif	11jan18_SPRET_m1	SPRET male	SPRET	male	M.spretus	M.spretus	14jun18_11jan18_SPRET_m1_sp1_26_rev.tif_Batch11
Batch11		28jul17_30may17_SPRET_m1_sp1_3_rev.tif	13140-7081-13710.tif	2	20	25	yes	yes	1	0	28jul17_30may17_SPRET_m1_sp1_3_rev.tif	30may17_SPRET_m1	SPRET male	SPRET	male	M.spretus	M.spretus	28jul17_30may17_SPRET_m1_sp1_3_rev.tif_Batch11
Batch11		14jun18_11jan18_SPRET_m1_sp1_21_rev.tif	8481-5748-7848.tif	2	20	26	no	yes	0	0	14jun18_11jan18_SPRET_m1_sp1_21_rev.tif	11jan18_SPRET_m1	SPRET male	SPRET	male	M.spretus	M.spretus	14jun18_11jan18_SPRET_m1_sp1_21_rev.tif_Batch11
Batch11		28jul17_30may17_SPRET_m1_sp1_9_rev.tif	22890-26864-27457.tif	2	20	27	no	no	0	0	28jul17_30may17_SPRET_m1_sp1_9_rev.tif	30may17_SPRET_m1	SPRET male	SPRET	male	M.spretus	M.spretus	28jul17_30may17_SPRET_m1_sp1_9_rev.tif_Batch11
Batch11		14jun18_11jan18_SPRET_m1_sp1_8_rev.tif	11111-254-7043.tif	2	20	27	no	yes	0	0	14jun18_11jan18_SPRET_m1_sp1_8_rev.tif	11jan18_SPRET_m1	SPRET male	SPRET	male	M.spretus	M.spretus	14jun18_11jan18_SPRET_m1_sp1_8_rev.tif_Batch11
Batch11		14jun18_11jan18_SPRET_m1_sp1_2.1_rev.tif	11648-13024-21479.tif	2	20	27	no	yes	0	0	14jun18_11jan18_SPRET_m1_sp1_2.1_rev.tif	11jan18_SPRET_m1	SPRET male	SPRET	male	M.spretus	M.spretus	14jun18_11jan18_SPRET_m1_sp1_2.1_rev.tif_Batch11
Batch11		9mar18_13oct17_SPRET_m1_sp1_1_rev.tif	32656-28307-22966.tif	2	20	27	no	yes	0	0	9mar18_13oct17_SPRET_m1_sp1_1_rev.tif	13oct17_SPRET_m1	SPRET male	SPRET	male	M.spretus	M.spretus	9mar18_13oct17_SPRET_m1_sp1_1_rev.tif_Batch11
Batch11		28jul17_30may17_SPRET_m1_sp1_10_rev.tif	14542-9348-22464.tif	2	20	28	no	yes	0	0	28jul17_30may17_SPRET_m1_sp1_10_rev.tif	30may17_SPRET_m1	SPRET male	SPRET	male	M.spretus	M.spretus	28jul17_30may17_SPRET_m1_sp1_10_rev.tif_Batch11
Batch11		28jul17_30may17_SPRET_m1_sp1_7_rev.tif	29524-8091-20389.tif	2	20	28	no	yes	0	0	28jul17_30may17_SPRET_m1_sp1_7_rev.tif	30may17_SPRET_m1	SPRET male	SPRET	male	M.spretus	M.spretus	28jul17_30may17_SPRET_m1_sp1_7_rev.tif_Batch11
Batch11		9mar18_13oct17_SPRET_m1_sp1_21_rev.tif	24885-23475-13880.tif	2	20	29	no	yes	0	0	9mar18_13oct17_SPRET_m1_sp1_21_rev.tif	13oct17_SPRET_m1	SPRET male	SPRET	male	M.spretus	M.spretus	9mar18_13oct17_SPRET_m1_sp1_21_rev.tif_Batch11
Batch11		16mar18_11jan18_SPRET_m1_sp1_3.2_rev.tif	17177-416-1447.tif	2	20	29	no	yes	0	0	16mar18_11jan18_SPRET_m1_sp1_3.2_rev.tif	11jan18_SPRET_m1	SPRET male	SPRET	male	M.spretus	M.spretus	16mar18_11jan18_SPRET_m1_sp1_3.2_rev.tif_Batch11
Batch0		13jul15_12jun15_WSB_f1_sp1_12_rev.tif	32240-28900-11459.tif	2	20	25	no	na	0	0	13jul15_12jun15_WSB_f1_sp1_12_rev.tif	12jun15_WSB_f1	WSB female	WSB	female	Dom	M.musculus	13jul15_12jun15_WSB_f1_sp1_12_rev.tif_Batch0
Batch0		9mar16_3nov15_WSB_f1_sp3_27_rev.tif	2314-20481-534.tif	2	20	24	no	na	0	0	9mar16_3nov15_WSB_f1_sp3_27_rev.tif	3nov15_WSB_f1	WSB female	WSB	female	Dom	M.musculus	9mar16_3nov15_WSB_f1_sp3_27_rev.tif_Batch0
Batch0		23apr15_4apr15_WSB_f1_sp1_4_rev.tif	7626-15059-32457.tif	2	20	26	yes	na	0	0	23apr15_4apr15_WSB_f1_sp1_4_rev.tif	4apr15_WSB_f1	WSB female	WSB	female	Dom	M.musculus	23apr15_4apr15_WSB_f1_sp1_4_rev.tif_Batch0
Batch0		13jul15_12jun15_WSB_f1_sp1_13_rev.tif	8994-18819-25491.tif	2	20	26	no	na	1	0	13jul15_12jun15_WSB_f1_sp1_13_rev.tif	12jun15_WSB_f1	WSB female	WSB	female	Dom	M.musculus	13jul15_12jun15_WSB_f1_sp1_13_rev.tif_Batch0
Batch0		18aug15_12jun15_WSB_f2_sp2_14_rev.tif	22874-20065-16963.tif	2	20	22	no	na	1	0	18aug15_12jun15_WSB_f2_sp2_14_rev.tif	12jun15_WSB_f2	WSB female	WSB	female	Dom	M.musculus	18aug15_12jun15_WSB_f2_sp2_14_rev.tif_Batch0
Batch0		23apr15_4apr15_WSB_f1_sp1_10_rev.tif	23976-817-19388.tif	2	20	22	no	na	1	0	23apr15_4apr15_WSB_f1_sp1_10_rev.tif	4apr15_WSB_f1	WSB female	WSB	female	Dom	M.musculus	23apr15_4apr15_WSB_f1_sp1_10_rev.tif_Batch0
Batch0		23apr15_4apr15_WSB_f1_sp1_14_rev.tif	1497-7863-14123.tif	2	20	23	no	na	1	0	23apr15_4apr15_WSB_f1_sp1_14_rev.tif	4apr15_WSB_f1	WSB female	WSB	female	Dom	M.musculus	23apr15_4apr15_WSB_f1_sp1_14_rev.tif_Batch0
Batch0		23apr15_4apr15_WSB_f1_sp1_27_rev.tif	6166-19850-11395.tif	2	20	22	no	na	1	0	23apr15_4apr15_WSB_f1_sp1_27_rev.tif	4apr15_WSB_f1	WSB female	WSB	female	Dom	M.musculus	23apr15_4apr15_WSB_f1_sp1_27_rev.tif_Batch0
Batch0		23apr15_4apr15_WSB_f2_sp1_20_rev.tif	5042-29020-24110.tif	2	20	29	no	na	1	0	23apr15_4apr15_WSB_f2_sp1_20_rev.tif	4apr15_WSB_f2	WSB female	WSB	female	Dom	M.musculus	23apr15_4apr15_WSB_f2_sp1_20_rev.tif_Batch0
Batch0		23apr15_4apr15_WSB_f2_sp1_21_rev.tif	20021-17117-7715.tif	2	20	24	no	na	1	0	23apr15_4apr15_WSB_f2_sp1_21_rev.tif	4apr15_WSB_f2	WSB female	WSB	female	Dom	M.musculus	23apr15_4apr15_WSB_f2_sp1_21_rev.tif_Batch0
Batch0		1jul15_12jun15_WSB_f2_sp1_29_rev.tif	23640-19343-8532.tif	2	20	18	no	na	2	0	1jul15_12jun15_WSB_f2_sp1_29_rev.tif	12jun15_WSB_f2	WSB female	WSB	female	Dom	M.musculus	1jul15_12jun15_WSB_f2_sp1_29_rev.tif_Batch0
Batch0		9mar16_3nov15_WSB_f1_sp3_6_rev.tif	21996-18829-178.tif	2	20	30	no	na	0	1	9mar16_3nov15_WSB_f1_sp3_6_rev.tif	3nov15_WSB_f1	WSB female	WSB	female	Dom	M.musculus	9mar16_3nov15_WSB_f1_sp3_6_rev.tif_Batch0
Batch2		9mar16_3nov15_WSB_f1_sp3_25_rev.tif	10910-16805-22782.tif	2	20	23	no		0	0	9mar16_3nov15_WSB_f1_sp3_25_rev.tif	3nov15_WSB_f1	WSB female	WSB	female	Dom	M.musculus	9mar16_3nov15_WSB_f1_sp3_25_rev.tif_Batch2
Batch2		9mar16_3nov15_WSB_f1_sp3_18_rev.tif	11199-14533-4467.tif	2	20	24	no		1	0	9mar16_3nov15_WSB_f1_sp3_18_rev.tif	3nov15_WSB_f1	WSB female	WSB	female	Dom	M.musculus	9mar16_3nov15_WSB_f1_sp3_18_rev.tif_Batch2
Batch2		17nov16_3nov15_WSB_f1_sp3_7_rev.tif	19555-9601-29251.tif	2	20	19	no		2	0	17nov16_3nov15_WSB_f1_sp3_7_rev.tif	3nov15_WSB_f1	WSB female	WSB	female	Dom	M.musculus	17nov16_3nov15_WSB_f1_sp3_7_rev.tif_Batch2
Batch2		9mar16_3nov15_WSB_f1_sp3_5_rev.tif	21384-25655-26875.tif	2	20	21	no		2	0	9mar16_3nov15_WSB_f1_sp3_5_rev.tif	3nov15_WSB_f1	WSB female	WSB	female	Dom	M.musculus	9mar16_3nov15_WSB_f1_sp3_5_rev.tif_Batch2
Batch2		17nov16_3nov15_WSB_f1_sp3_11_rev.tif	21526-29121-15947.tif	2	20	26	no		0	0	17nov16_3nov15_WSB_f1_sp3_11_rev.tif	3nov15_WSB_f1	WSB female	WSB	female	Dom	M.musculus	17nov16_3nov15_WSB_f1_sp3_11_rev.tif_Batch2
Batch2		1may16_3nov15_WSB_f1_sp2_9_rev.tif	23893-3411-10119.tif	2	20	21	no		0	0	1may16_3nov15_WSB_f1_sp2_9_rev.tif	3nov15_WSB_f1	WSB female	WSB	female	Dom	M.musculus	1may16_3nov15_WSB_f1_sp2_9_rev.tif_Batch2
Batch2		17nov16_3nov15_WSB_f1_sp3_8_rev.tif	24279-20226-4481.tif	2	20	21	no		0	0	17nov16_3nov15_WSB_f1_sp3_8_rev.tif	3nov15_WSB_f1	WSB female	WSB	female	Dom	M.musculus	17nov16_3nov15_WSB_f1_sp3_8_rev.tif_Batch2
Batch2		1may16_3nov15_WSB_f1_sp2_6_rev.tif	26961-31718-4745.tif	2	20	23	no		0	0	1may16_3nov15_WSB_f1_sp2_6_rev.tif	3nov15_WSB_f1	WSB female	WSB	female	Dom	M.musculus	1may16_3nov15_WSB_f1_sp2_6_rev.tif_Batch2
Batch2		1may16_3nov15_WSB_f1_sp2_14_rev.tif	27307-27291-8850.tif	2	20	32	no		0	0	1may16_3nov15_WSB_f1_sp2_14_rev.tif	3nov15_WSB_f1	WSB female	WSB	female	Dom	M.musculus	1may16_3nov15_WSB_f1_sp2_14_rev.tif_Batch2
Batch2		17nov16_3nov15_WSB_f1_sp3_2_rev.tif	27347-14836-28727.tif	2	20	22	no		1	0	17nov16_3nov15_WSB_f1_sp3_2_rev.tif	3nov15_WSB_f1	WSB female	WSB	female	Dom	M.musculus	17nov16_3nov15_WSB_f1_sp3_2_rev.tif_Batch2
Batch2		1may16_3nov15_WSB_f1_sp2_15_rev.tif	28869-2969-13252.tif	2	20	29	no		0	0	1may16_3nov15_WSB_f1_sp2_15_rev.tif	3nov15_WSB_f1	WSB female	WSB	female	Dom	M.musculus	1may16_3nov15_WSB_f1_sp2_15_rev.tif_Batch2
Batch2		9mar16_3nov15_WSB_f1_sp3_22_rev.tif	2847-18608-9292.tif	2	20	27	no		0	1	9mar16_3nov15_WSB_f1_sp3_22_rev.tif	3nov15_WSB_f1	WSB female	WSB	female	Dom	M.musculus	9mar16_3nov15_WSB_f1_sp3_22_rev.tif_Batch2
Batch2		9mar16_3nov15_WSB_f1_sp3_4_rev.tif	1269-30741-987.tif	2	20	23	no		2	2	9mar16_3nov15_WSB_f1_sp3_4_rev.tif	3nov15_WSB_f1	WSB female	WSB	female	Dom	M.musculus	9mar16_3nov15_WSB_f1_sp3_4_rev.tif_Batch2
batch8		11dec17_18nov17_WSB_f1_sp1_17_rev.tif	10193-25011-11584.tif	2	20	23	no		0	1	11dec17_18nov17_WSB_f1_sp1_17_rev.tif	18nov17_WSB_f1	WSB female	WSB	female	Dom	M.musculus	11dec17_18nov17_WSB_f1_sp1_17_rev.tif_batch8
batch8		11dec17_18nov17_WSB_f1_sp1_4_rev.tif	11949-27803-3038.tif	2	20	24	no		0	0	11dec17_18nov17_WSB_f1_sp1_4_rev.tif	18nov17_WSB_f1	WSB female	WSB	female	Dom	M.musculus	11dec17_18nov17_WSB_f1_sp1_4_rev.tif_batch8
batch8		26dec17_18nov17_WSB_f4_sp1_1_rev.tif	13329-29743-15103.tif	2	20	22	no		0	1	26dec17_18nov17_WSB_f4_sp1_1_rev.tif	18nov17_WSB_f4	WSB female	WSB	female	Dom	M.musculus	26dec17_18nov17_WSB_f4_sp1_1_rev.tif_batch8
batch8		14dec17_18nov17_WSB_f3_sp1_7_rev.tif	16327-8623-8540.tif	2	20	26	no		0	0	14dec17_18nov17_WSB_f3_sp1_7_rev.tif	18nov17_WSB_f3	WSB female	WSB	female	Dom	M.musculus	14dec17_18nov17_WSB_f3_sp1_7_rev.tif_batch8
batch8		12dec17_18nov17_WSB_f2_sp1_5_rev.tif	17759-1689-5516.tif	2	20	30	no		0	0	12dec17_18nov17_WSB_f2_sp1_5_rev.tif	18nov17_WSB_f2	WSB female	WSB	female	Dom	M.musculus	12dec17_18nov17_WSB_f2_sp1_5_rev.tif_batch8
batch8		14dec17_18nov17_WSB_f3_sp1_6_rev.tif	21312-1013-32425.tif	2	20	29	no		0	0	14dec17_18nov17_WSB_f3_sp1_6_rev.tif	18nov17_WSB_f3	WSB female	WSB	female	Dom	M.musculus	14dec17_18nov17_WSB_f3_sp1_6_rev.tif_batch8
batch8		14dec17_18nov17_WSB_f3_sp1_49_rev.tif	21675-17259-5056.tif	2	20	25	no		0	0	14dec17_18nov17_WSB_f3_sp1_49_rev.tif	18nov17_WSB_f3	WSB female	WSB	female	Dom	M.musculus	14dec17_18nov17_WSB_f3_sp1_49_rev.tif_batch8
batch8		11dec17_18nov17_WSB_f1_sp1_14_rev.tif	23820-22084-27616.tif	2	20	23	no		0	0	11dec17_18nov17_WSB_f1_sp1_14_rev.tif	18nov17_WSB_f1	WSB female	WSB	female	Dom	M.musculus	11dec17_18nov17_WSB_f1_sp1_14_rev.tif_batch8
batch8		14dec17_18nov17_WSB_f3_sp1_44_rev.tif	24019-4093-17707.tif	2	20	21	no		0	3	14dec17_18nov17_WSB_f3_sp1_44_rev.tif	18nov17_WSB_f3	WSB female	WSB	female	Dom	M.musculus	14dec17_18nov17_WSB_f3_sp1_44_rev.tif_batch8
batch8		14dec17_18nov17_WSB_f3_sp1_19_rev.tif	27743-24072-12399.tif	2	20	35	no		0	0	14dec17_18nov17_WSB_f3_sp1_19_rev.tif	18nov17_WSB_f3	WSB female	WSB	female	Dom	M.musculus	14dec17_18nov17_WSB_f3_sp1_19_rev.tif_batch8
batch8		14dec17_18nov17_WSB_f3_sp1_57_rev.tif	28704-9325-4109.tif	2	20	27	no		0	0	14dec17_18nov17_WSB_f3_sp1_57_rev.tif	18nov17_WSB_f3	WSB female	WSB	female	Dom	M.musculus	14dec17_18nov17_WSB_f3_sp1_57_rev.tif_batch8
batch8		11dec17_18nov17_WSB_f1_sp1_7_rev.tif	4382-17007-22369.tif	2	20	29	no		0	0	11dec17_18nov17_WSB_f1_sp1_7_rev.tif	18nov17_WSB_f1	WSB female	WSB	female	Dom	M.musculus	11dec17_18nov17_WSB_f1_sp1_7_rev.tif_batch8
batch8		14dec17_18nov17_WSB_f3_sp1_18_rev.tif	4419-29121-30280.tif	2	20	27	no		0	0	14dec17_18nov17_WSB_f3_sp1_18_rev.tif	18nov17_WSB_f3	WSB female	WSB	female	Dom	M.musculus	14dec17_18nov17_WSB_f3_sp1_18_rev.tif_batch8
batch8		12dec17_18nov17_WSB_f2_sp1_9_rev.tif	13425-14405-13733.tif	2	20	25	no		1	2	12dec17_18nov17_WSB_f2_sp1_9_rev.tif	18nov17_WSB_f2	WSB female	WSB	female	Dom	M.musculus	12dec17_18nov17_WSB_f2_sp1_9_rev.tif_batch8
batch8		11dec17_18nov17_WSB_f1_sp1_3_rev.tif	14663-3573-5127.tif	2	20	30	no		1	0	11dec17_18nov17_WSB_f1_sp1_3_rev.tif	18nov17_WSB_f1	WSB female	WSB	female	Dom	M.musculus	11dec17_18nov17_WSB_f1_sp1_3_rev.tif_batch8
batch8		11dec17_18nov17_WSB_f1_sp1_5_rev.tif	23261-32695-21267.tif	2	20	27	no		1	0	11dec17_18nov17_WSB_f1_sp1_5_rev.tif	18nov17_WSB_f1	WSB female	WSB	female	Dom	M.musculus	11dec17_18nov17_WSB_f1_sp1_5_rev.tif_batch8
batch8		12dec17_18nov17_WSB_f2_sp1_6_rev.tif	24895-818-548.tif	2	20	35	no		1	0	12dec17_18nov17_WSB_f2_sp1_6_rev.tif	18nov17_WSB_f2	WSB female	WSB	female	Dom	M.musculus	12dec17_18nov17_WSB_f2_sp1_6_rev.tif_batch8
batch8		12dec17_18nov17_WSB_f2_sp1_8_rev.tif	28065-3411-23498.tif	2	20	26	no		1	1	12dec17_18nov17_WSB_f2_sp1_8_rev.tif	18nov17_WSB_f2	WSB female	WSB	female	Dom	M.musculus	12dec17_18nov17_WSB_f2_sp1_8_rev.tif_batch8
batch8		11dec17_18nov17_WSB_f1_sp1_20_rev.tif	31933-17962-2566.tif	2	20	34	no		1	0	11dec17_18nov17_WSB_f1_sp1_20_rev.tif	18nov17_WSB_f1	WSB female	WSB	female	Dom	M.musculus	11dec17_18nov17_WSB_f1_sp1_20_rev.tif_batch8
batch8		14dec17_18nov17_WSB_f3_sp1_35_rev.tif	10256-11874-20554.tif	2	20	25	no		2	0	14dec17_18nov17_WSB_f3_sp1_35_rev.tif	18nov17_WSB_f3	WSB female	WSB	female	Dom	M.musculus	14dec17_18nov17_WSB_f3_sp1_35_rev.tif_batch8
Batch14		2apr15_14sep14_WSB_f1_sp1_3_rev.tif	22167-31942-22194.tif	2	20	26	no		2	0	2apr15_14sep14_WSB_f1_sp1_3_rev.tif	14sep14_WSB_f1	WSB female	WSB	female	Dom	M.musculus	2apr15_14sep14_WSB_f1_sp1_3_rev.tif_Batch14
Batch14		19jan15_8oct14_WSB_f1_sp2_6_rev.tif	651-1571-28098.tif	2	20	28	no		1	0	19jan15_8oct14_WSB_f1_sp2_6_rev.tif	8oct14_WSB_f1	WSB female	WSB	female	Dom	M.musculus	19jan15_8oct14_WSB_f1_sp2_6_rev.tif_Batch14
Batch14		19jan15_8oct14_WSB_f1_sp2_4_rev.tif	27537-26820-18173.tif	2	20	24	no		0	0	19jan15_8oct14_WSB_f1_sp2_4_rev.tif	8oct14_WSB_f1	WSB female	WSB	female	Dom	M.musculus	19jan15_8oct14_WSB_f1_sp2_4_rev.tif_Batch14
Batch14		15sep15_16jun15_WSB_f3_sp2_4_rev.tif	20855-12803-18370.tif	2	20	22	no		1	0	15sep15_16jun15_WSB_f3_sp2_4_rev.tif	16jun15_WSB_f3	WSB female	WSB	female	Dom	M.musculus	15sep15_16jun15_WSB_f3_sp2_4_rev.tif_Batch14
Batch14		15sep15_16jun15_WSB_f3_sp2_1_rev.tif	17809-14130-30387.tif	2	20	28	no		0	0	15sep15_16jun15_WSB_f3_sp2_1_rev.tif	16jun15_WSB_f3	WSB female	WSB	female	Dom	M.musculus	15sep15_16jun15_WSB_f3_sp2_1_rev.tif_Batch14
Batch0		12jul15_12jun15_WSB_m1_sp1_13.2_rev.tif	32658-27026-3309.tif	2	20	19	yes	yes	0	0	12jul15_12jun15_WSB_m1_sp1_13.2_rev.tif	12jun15_WSB_m1	WSB male	WSB	male	Dom	M.musculus	12jul15_12jun15_WSB_m1_sp1_13.2_rev.tif_Batch0
Batch0		12jul15_12jun15_WSB_m1_sp1_9.1_rev.tif	22644-30940-5410.tif	2	20	21	no	yes	0	0	12jul15_12jun15_WSB_m1_sp1_9.1_rev.tif	12jun15_WSB_m1	WSB male	WSB	male	Dom	M.musculus	12jul15_12jun15_WSB_m1_sp1_9.1_rev.tif_Batch0
Batch0		27aug15_12jun15_WSB_m2_sp1_1.1_rev.tif	26753-3098-11904.tif	2	20	21	no	yes	0	0	27aug15_12jun15_WSB_m2_sp1_1.1_rev.tif	12jun15_WSB_m2	WSB male	WSB	male	Dom	M.musculus	27aug15_12jun15_WSB_m2_sp1_1.1_rev.tif_Batch0
Batch0		27aug15_12jun15_WSB_m2_sp1_10_rev.tif	30568-17748-30422.tif	2	20	21	no	yes	0	0	27aug15_12jun15_WSB_m2_sp1_10_rev.tif	12jun15_WSB_m2	WSB male	WSB	male	Dom	M.musculus	27aug15_12jun15_WSB_m2_sp1_10_rev.tif_Batch0
Batch0		30jul15_12jun15_WSB_m2_sp1_3_rev.tif	1815-11900-13115.tif	2	20	25	yes	yes	0	0	30jul15_12jun15_WSB_m2_sp1_3_rev.tif	12jun15_WSB_m2	WSB male	WSB	male	Dom	M.musculus	30jul15_12jun15_WSB_m2_sp1_3_rev.tif_Batch0
Batch0		30jul15_12jun15_WSB_m2_sp1_8_rev.tif	14186-10918-6009.tif	2	20	22	no	yes	0	0	30jul15_12jun15_WSB_m2_sp1_8_rev.tif	12jun15_WSB_m2	WSB male	WSB	male	Dom	M.musculus	30jul15_12jun15_WSB_m2_sp1_8_rev.tif_Batch0
Batch0		27aug15_12jun15_WSB_m2_sp1_9.1_rev.tif	3534-19042-20527.tif	2	20	25	no	yes	0	0	27aug15_12jun15_WSB_m2_sp1_9.1_rev.tif	12jun15_WSB_m2	WSB male	WSB	male	Dom	M.musculus	27aug15_12jun15_WSB_m2_sp1_9.1_rev.tif_Batch0
Batch0		10jun15_18may15_WSB_m1_sp1_15_rev.tif	19186-25374-13053.tif	2	20	26	yes	yes	0	0	10jun15_18may15_WSB_m1_sp1_15_rev.tif	18may15_WSB_m1	WSB male	WSB	male	Dom	M.musculus	10jun15_18may15_WSB_m1_sp1_15_rev.tif_Batch0
Batch0		10jun15_18may15_WSB_m1_sp1_6_rev.tif	23676-6056-2413.tif	2	20	27	no	yes	0	0	10jun15_18may15_WSB_m1_sp1_6_rev.tif	18may15_WSB_m1	WSB male	WSB	male	Dom	M.musculus	10jun15_18may15_WSB_m1_sp1_6_rev.tif_Batch0
Batch0		10jun15_18may15_WSB_m1_sp1_9.2_rev.tif	2243-11801-513.tif	2	20	23	yes	no	0	0	10jun15_18may15_WSB_m1_sp1_9.2_rev.tif	18may15_WSB_m1	WSB male	WSB	male	Dom	M.musculus	10jun15_18may15_WSB_m1_sp1_9.2_rev.tif_Batch0
Batch0		10apr15_31mar15_WSB_m1_sp1_1_rev.tif	14179-22247-1888.tif	2	20	23	yes	yes	0	0	10apr15_31mar15_WSB_m1_sp1_1_rev.tif	31mar15_WSB_m1	WSB male	WSB	male	Dom	M.musculus	10apr15_31mar15_WSB_m1_sp1_1_rev.tif_Batch0
Batch0		19may15_31mar15_WSB_m1_sp1_21.2_rev.tif	2147-3711-32641.tif	2	20	23	no	yes	0	0	19may15_31mar15_WSB_m1_sp1_21.2_rev.tif	31mar15_WSB_m1	WSB male	WSB	male	Dom	M.musculus	19may15_31mar15_WSB_m1_sp1_21.2_rev.tif_Batch0
Batch0		19may15_31mar15_WSB_m1_sp1_24_rev.tif	30061-22174-5586.tif	2	20	31	no	yes	0	0	19may15_31mar15_WSB_m1_sp1_24_rev.tif	31mar15_WSB_m1	WSB male	WSB	male	Dom	M.musculus	19may15_31mar15_WSB_m1_sp1_24_rev.tif_Batch0
Batch0		19may15_31mar15_WSB_m1_sp1_4_rev.tif	10650-1709-17314.tif	2	20	26	yes	yes	0	0	19may15_31mar15_WSB_m1_sp1_4_rev.tif	31mar15_WSB_m1	WSB male	WSB	male	Dom	M.musculus	19may15_31mar15_WSB_m1_sp1_4_rev.tif_Batch0
Batch0		27aug15_12jun15_WSB_m2_sp1_8.1_rev.tif	2141-8838-15083.tif	2	20	21			0	0	27aug15_12jun15_WSB_m2_sp1_8.1_rev.tif	12jun15_WSB_m2	WSB male	WSB	male	Dom	M.musculus	27aug15_12jun15_WSB_m2_sp1_8.1_rev.tif_Batch0
Batch0		12jul15_12jun15_WSB_m1_sp1_5_rev.tif	2467-23511-31838.tif	2	20	21	no	yes	1	0	12jul15_12jun15_WSB_m1_sp1_5_rev.tif	12jun15_WSB_m1	WSB male	WSB	male	Dom	M.musculus	12jul15_12jun15_WSB_m1_sp1_5_rev.tif_Batch0
Batch0		27aug15_12jun15_WSB_m2_sp1_19_rev.tif	25178-18927-2674.tif	2	20	20	no	yes	1	0	27aug15_12jun15_WSB_m2_sp1_19_rev.tif	12jun15_WSB_m2	WSB male	WSB	male	Dom	M.musculus	27aug15_12jun15_WSB_m2_sp1_19_rev.tif_Batch0
Batch0		27aug15_12jun15_WSB_m2_sp1_24.1_rev.tif	20635-32455-17114.tif	2	20	27	no	yes	1	0	27aug15_12jun15_WSB_m2_sp1_24.1_rev.tif	12jun15_WSB_m2	WSB male	WSB	male	Dom	M.musculus	27aug15_12jun15_WSB_m2_sp1_24.1_rev.tif_Batch0
Batch0		30jul15_12jun15_WSB_m2_sp1_5_rev.tif	20639-31506-11864.tif	2	20	21	no	yes	1	0	30jul15_12jun15_WSB_m2_sp1_5_rev.tif	12jun15_WSB_m2	WSB male	WSB	male	Dom	M.musculus	30jul15_12jun15_WSB_m2_sp1_5_rev.tif_Batch0
Batch0		13apr15_31mar15_WSB_m2_sp1_10.1_rev.tif	21699-29107-31707.tif	2	20	22	yes	yes	1	0	13apr15_31mar15_WSB_m2_sp1_10.1_rev.tif	31mar15_WSB_m2	WSB male	WSB	male	Dom	M.musculus	13apr15_31mar15_WSB_m2_sp1_10.1_rev.tif_Batch0
Batch0		13apr15_31mar15_WSB_m2_sp1_14_rev.tif	31403-971-29924.tif	2	20	23	yes	yes	1	0	13apr15_31mar15_WSB_m2_sp1_14_rev.tif	31mar15_WSB_m2	WSB male	WSB	male	Dom	M.musculus	13apr15_31mar15_WSB_m2_sp1_14_rev.tif_Batch0
Batch0		13apr15_31mar15_WSB_m2_sp1_2_rev.tif	5635-18679-11544.tif	2	20	22	no	yes	1	0	13apr15_31mar15_WSB_m2_sp1_2_rev.tif	31mar15_WSB_m2	WSB male	WSB	male	Dom	M.musculus	13apr15_31mar15_WSB_m2_sp1_2_rev.tif_Batch0
Batch13		2nov15_16sep15_WSB_m1_sp1_16.2_rev.tif	4494-20266-8706.tif	2	20	27	no	yes	1	0	2nov15_16sep15_WSB_m1_sp1_16.2_rev.tif	16sep15_WSB_m1	WSB male	WSB	male	Dom	M.musculus	2nov15_16sep15_WSB_m1_sp1_16.2_rev.tif_Batch13
Batch13		2nov15_16sep15_WSB_m1_sp1_12_rev.tif	4084-23653-23153.tif	2	20	28	no	yes	0	0	2nov15_16sep15_WSB_m1_sp1_12_rev.tif	16sep15_WSB_m1	WSB male	WSB	male	Dom	M.musculus	2nov15_16sep15_WSB_m1_sp1_12_rev.tif_Batch13
Batch13		9mar15_24sep14_WSB_m1_sp1_6.2_rev.tif	32658-31770-429.tif	2	20	28	no	yes	0	1	9mar15_24sep14_WSB_m1_sp1_6.2_rev.tif	24sep14_WSB_m1	WSB male	WSB	male	Dom	M.musculus	9mar15_24sep14_WSB_m1_sp1_6.2_rev.tif_Batch13
Batch13		9mar15_24sep14_WSB_m1_sp1_7.3_rev.tif	32498-31849-10401.tif	2	20	25	no	yes	0	1	9mar15_24sep14_WSB_m1_sp1_7.3_rev.tif	24sep14_WSB_m1	WSB male	WSB	male	Dom	M.musculus	9mar15_24sep14_WSB_m1_sp1_7.3_rev.tif_Batch13
Batch13		2nov15_16sep15_WSB_m1_sp1_16.4_rev.tif	28131-16268-29973.tif	2	20	24	no	yes	0	0	2nov15_16sep15_WSB_m1_sp1_16.4_rev.tif	16sep15_WSB_m1	WSB male	WSB	male	Dom	M.musculus	2nov15_16sep15_WSB_m1_sp1_16.4_rev.tif_Batch13
Batch13		9mar15_24sep14_WSB_m1_sp1_20_rev.tif	26484-19822-24605.tif	2	20	25	no	yes	0	0	9mar15_24sep14_WSB_m1_sp1_20_rev.tif	24sep14_WSB_m1	WSB male	WSB	male	Dom	M.musculus	9mar15_24sep14_WSB_m1_sp1_20_rev.tif_Batch13
Batch13		2nov15_16sep15_WSB_m1_sp1_21.1_rev.tif	25903-3704-29484.tif	2	20	23	no	yes	0	0	2nov15_16sep15_WSB_m1_sp1_21.1_rev.tif	16sep15_WSB_m1	WSB male	WSB	male	Dom	M.musculus	2nov15_16sep15_WSB_m1_sp1_21.1_rev.tif_Batch13
Batch13		2nov15_16sep15_WSB_m1_sp1_21.3_rev.tif	24968-3426-15221.tif	2	20	21	no	yes	0	0	2nov15_16sep15_WSB_m1_sp1_21.3_rev.tif	16sep15_WSB_m1	WSB male	WSB	male	Dom	M.musculus	2nov15_16sep15_WSB_m1_sp1_21.3_rev.tif_Batch13
Batch13		9mar15_24sep14_WSB_m1_sp1_10.3_rev.tif	2489-9010-1544.tif	2	20	25	no	yes	1	0	9mar15_24sep14_WSB_m1_sp1_10.3_rev.tif	24sep14_WSB_m1	WSB male	WSB	male	Dom	M.musculus	9mar15_24sep14_WSB_m1_sp1_10.3_rev.tif_Batch13
Batch13		9mar15_24sep14_WSB_m1_sp1_19_rev.tif	24614-18022-19097.tif	2	20	23	no	yes	0	0	9mar15_24sep14_WSB_m1_sp1_19_rev.tif	24sep14_WSB_m1	WSB male	WSB	male	Dom	M.musculus	9mar15_24sep14_WSB_m1_sp1_19_rev.tif_Batch13
Batch13		9mar15_24sep14_WSB_m1_sp1_13.3_rev.tif	20516-21936-20490.tif	2	20	20	no	yes	1	0	9mar15_24sep14_WSB_m1_sp1_13.3_rev.tif	24sep14_WSB_m1	WSB male	WSB	male	Dom	M.musculus	9mar15_24sep14_WSB_m1_sp1_13.3_rev.tif_Batch13
Batch13		2nov15_16sep15_WSB_m1_sp1_15_rev.tif	18064-16419-17332.tif	2	20	24	no	yes	0	0	2nov15_16sep15_WSB_m1_sp1_15_rev.tif	16sep15_WSB_m1	WSB male	WSB	male	Dom	M.musculus	2nov15_16sep15_WSB_m1_sp1_15_rev.tif_Batch13
Batch13		2nov15_16sep15_WSB_m1_sp1_16.3_rev.tif	16614-11941-5143.tif	2	20	23	no	yes	1	0	2nov15_16sep15_WSB_m1_sp1_16.3_rev.tif	16sep15_WSB_m1	WSB male	WSB	male	Dom	M.musculus	2nov15_16sep15_WSB_m1_sp1_16.3_rev.tif_Batch13
Batch15		8jan15_30dec14_WSB_m2_sp1_4_rev.tif	26534-31025-22971.tif	2	20	20	no	yes	0	0	8jan15_30dec14_WSB_m2_sp1_4_rev.tif	30dec14_WSB_m2	WSB male	WSB	male	Dom	M.musculus	8jan15_30dec14_WSB_m2_sp1_4_rev.tif_Batch15
Batch15		9mar15_24sep14_WSB_m1_sp1_11_rev.tif	9782-26791-16025.tif	2	20	20	no	yes	1	1	9mar15_24sep14_WSB_m1_sp1_11_rev.tif	24sep14_WSB_m1	WSB male	WSB	male	Dom	M.musculus	9mar15_24sep14_WSB_m1_sp1_11_rev.tif_Batch15
Batch15		18mar15_10mar15_WSB_m1_sp1_14_rev.tif	20331-27552-17375.tif	2	20	21	no	yes	0	0	18mar15_10mar15_WSB_m1_sp1_14_rev.tif	10mar15_WSB_m1	WSB male	WSB	male	Dom	M.musculus	18mar15_10mar15_WSB_m1_sp1_14_rev.tif_Batch15
Batch15		10apr15_31mar15_WSB_m3_sp1_22.3_rev.tif	9063-9892-12561.tif	2	20	21	no	no	1	0	10apr15_31mar15_WSB_m3_sp1_22.3_rev.tif	31mar15_WSB_m3	WSB male	WSB	male	Dom	M.musculus	10apr15_31mar15_WSB_m3_sp1_22.3_rev.tif_Batch15
Batch15		10apr15_31mar15_WSB_m3_sp1_7.1_rev.tif	17216-4992-14871.tif	2	20	22	no	yes	1	0	10apr15_31mar15_WSB_m3_sp1_7.1_rev.tif	31mar15_WSB_m3	WSB male	WSB	male	Dom	M.musculus	10apr15_31mar15_WSB_m3_sp1_7.1_rev.tif_Batch15
Batch15		8jan15_30dec14_WSB_m2_sp1_42_rev.tif	18600-2238-22077.tif	2	20	22	no	yes	1	0	8jan15_30dec14_WSB_m2_sp1_42_rev.tif	30dec14_WSB_m2	WSB male	WSB	male	Dom	M.musculus	8jan15_30dec14_WSB_m2_sp1_42_rev.tif_Batch15
Batch15		10apr15_31mar15_WSB_m3_sp1_15_rev.tif	20130-23898-29017.tif	2	20	22	no	yes	0	0	10apr15_31mar15_WSB_m3_sp1_15_rev.tif	31mar15_WSB_m3	WSB male	WSB	male	Dom	M.musculus	10apr15_31mar15_WSB_m3_sp1_15_rev.tif_Batch15
Batch15		8jan15_30dec14_WSB_m2_sp1_17_rev.tif	3894-18816-13775.tif	2	20	22	no	yes	0	0	8jan15_30dec14_WSB_m2_sp1_17_rev.tif	30dec14_WSB_m2	WSB male	WSB	male	Dom	M.musculus	8jan15_30dec14_WSB_m2_sp1_17_rev.tif_Batch15
Batch15		2mar15_30dec14_WSB_m4_sp3_16_rev.tif	9626-13855-11570.tif	2	20	22	no	yes	2	0	2mar15_30dec14_WSB_m4_sp3_16_rev.tif	30dec14_WSB_m4	WSB male	WSB	male	Dom	M.musculus	2mar15_30dec14_WSB_m4_sp3_16_rev.tif_Batch15
Batch15		8jan15_30dec14_WSB_m2_sp1_32_rev.tif	26362-15468-32098.tif	2	20	23	no	yes	1	0	8jan15_30dec14_WSB_m2_sp1_32_rev.tif	30dec14_WSB_m2	WSB male	WSB	male	Dom	M.musculus	8jan15_30dec14_WSB_m2_sp1_32_rev.tif_Batch15
Batch15		10apr15_31mar15_WSB_m3_sp1_22.1_rev.tif	31344-1505-30062.tif	2	20	23	yes	yes	0	0	10apr15_31mar15_WSB_m3_sp1_22.1_rev.tif	31mar15_WSB_m3	WSB male	WSB	male	Dom	M.musculus	10apr15_31mar15_WSB_m3_sp1_22.1_rev.tif_Batch15
Batch15		9mar15_24sep14_WSB_m1_sp1_13.4_rev.tif	31632-16568-15787.tif	2	20	23	no	yes	0	0	9mar15_24sep14_WSB_m1_sp1_13.4_rev.tif	24sep14_WSB_m1	WSB male	WSB	male	Dom	M.musculus	9mar15_24sep14_WSB_m1_sp1_13.4_rev.tif_Batch15
Batch15		10apr15_31mar15_WSB_m3_sp1_4_rev.tif	9991-19390-9957.tif	2	20	23	no	yes	0	0	10apr15_31mar15_WSB_m3_sp1_4_rev.tif	31mar15_WSB_m3	WSB male	WSB	male	Dom	M.musculus	10apr15_31mar15_WSB_m3_sp1_4_rev.tif_Batch15
Batch15		9mar15_24sep14_WSB_m1_sp1_2.1_rev.tif	7879-19207-2146.tif	2	20	24	no	yes	1	0	9mar15_24sep14_WSB_m1_sp1_2.1_rev.tif	24sep14_WSB_m1	WSB male	WSB	male	Dom	M.musculus	9mar15_24sep14_WSB_m1_sp1_2.1_rev.tif_Batch15
Batch18		7mar15_1mar15_WSB_m1_sp4_14.1_rev (2).tif	21983-31896-26334.tif	2	20	24	no	yes	0	0	7mar15_1mar15_WSB_m1_sp4_14.1_rev (2).tif	1mar15_WSB_m1	WSB male	WSB	male	Dom	M.musculus	7mar15_1mar15_WSB_m1_sp4_14.1_rev (2).tif_Batch18
Batch18		7mar15_1mar15_WSB_m1_sp4_14.2_rev.tif	5611-25497-15552.tif	2	20	21	no	yes	0	0	7mar15_1mar15_WSB_m1_sp4_14.2_rev.tif	1mar15_WSB_m1	WSB male	WSB	male	Dom	M.musculus	7mar15_1mar15_WSB_m1_sp4_14.2_rev.tif_Batch18
Batch18		7mar15_1mar15_WSB_m1_sp4_18_rev.tif	20133-2964-8896.tif	2	20	26	no	yes	0	0	7mar15_1mar15_WSB_m1_sp4_18_rev.tif	1mar15_WSB_m1	WSB male	WSB	male	Dom	M.musculus	7mar15_1mar15_WSB_m1_sp4_18_rev.tif_Batch18
Batch18		9mar15_24sep14_WSB_m1_sp1_10.1_rev.tif	14683-29389-7634.tif	2	20	21	no	yes	0	0	9mar15_24sep14_WSB_m1_sp1_10.1_rev.tif	24sep14_WSB_m1	WSB male	WSB	male	Dom	M.musculus	9mar15_24sep14_WSB_m1_sp1_10.1_rev.tif_Batch18
Batch18		9mar15_24sep14_WSB_m1_sp1_14_rev.tif	3724-32104-16026.tif	2	20	23	no	yes	1	0	9mar15_24sep14_WSB_m1_sp1_14_rev.tif	24sep14_WSB_m1	WSB male	WSB	male	Dom	M.musculus	9mar15_24sep14_WSB_m1_sp1_14_rev.tif_Batch18
Batch18		9mar15_24sep14_WSB_m1_sp1_5_rev.tif	24710-32684-25307.tif	2	20	20	no	yes	2	0	9mar15_24sep14_WSB_m1_sp1_5_rev.tif	24sep14_WSB_m1	WSB male	WSB	male	Dom	M.musculus	9mar15_24sep14_WSB_m1_sp1_5_rev.tif_Batch18
Batch11		27jun18_8jun18_AST_m1_sp1_13.1_rev.tif	22070-15202-8326.tif	3	20	21	no	yes	0	0	27jun18_8jun18_AST_m1_sp1_13.1_rev.tif	8jun18_AST_m1	AST male	AST	male	Musc	M.musculus	27jun18_8jun18_AST_m1_sp1_13.1_rev.tif_Batch11
Batch11		27jun18_8jun18_AST_m1_sp1_14.2_rev.tif	14187-4242-14962.tif	3	20	22	no	yes	1	0	27jun18_8jun18_AST_m1_sp1_14.2_rev.tif	8jun18_AST_m1	AST male	AST	male	Musc	M.musculus	27jun18_8jun18_AST_m1_sp1_14.2_rev.tif_Batch11
Batch11		27jun18_8jun18_AST_m1_sp1_19_rev.tif	23085-10703-10492.tif	3	20	22	no	yes	0	0	27jun18_8jun18_AST_m1_sp1_19_rev.tif	8jun18_AST_m1	AST male	AST	male	Musc	M.musculus	27jun18_8jun18_AST_m1_sp1_19_rev.tif_Batch11
Batch11		29aug18_7aug18_AST_m1_sp1_27.2_rev.tif	9480-14093-16598.tif	3	20	22	no	yes	1	0	29aug18_7aug18_AST_m1_sp1_27.2_rev.tif	7aug18_AST_m1	AST male	AST	male	Musc	M.musculus	29aug18_7aug18_AST_m1_sp1_27.2_rev.tif_Batch11
Batch11		29aug18_7aug18_AST_m1_sp1_13_rev.tif	18280-13685-17604.tif	3	20	23	no	yes	1	0	29aug18_7aug18_AST_m1_sp1_13_rev.tif	7aug18_AST_m1	AST male	AST	male	Musc	M.musculus	29aug18_7aug18_AST_m1_sp1_13_rev.tif_Batch11
Batch11		29aug18_7aug18_AST_m1_sp1_15_rev.tif	18953-27194-9566.tif	3	20	23	no	yes	1	0	29aug18_7aug18_AST_m1_sp1_15_rev.tif	7aug18_AST_m1	AST male	AST	male	Musc	M.musculus	29aug18_7aug18_AST_m1_sp1_15_rev.tif_Batch11
Batch11		3jul18_8jun18_AST_m1_sp1_12.2_rev.tif	11205-12653-13551.tif	3	20	23	no	yes	1	0	3jul18_8jun18_AST_m1_sp1_12.2_rev.tif	8jun18_AST_m1	AST male	AST	male	Musc	M.musculus	3jul18_8jun18_AST_m1_sp1_12.2_rev.tif_Batch11
Batch11		29aug18_7aug18_AST_m1_sp1_1_rev.tif	11830-6473-536.tif	3	20	23	no	yes	2	0	29aug18_7aug18_AST_m1_sp1_1_rev.tif	7aug18_AST_m1	AST male	AST	male	Musc	M.musculus	29aug18_7aug18_AST_m1_sp1_1_rev.tif_Batch11
Batch11		27jun18_8jun18_AST_m1_sp1_11_rev.tif	17443-2785-214.tif	3	20	23	no	yes	0	0	27jun18_8jun18_AST_m1_sp1_11_rev.tif	8jun18_AST_m1	AST male	AST	male	Musc	M.musculus	27jun18_8jun18_AST_m1_sp1_11_rev.tif_Batch11
Batch11		27jun18_8jun18_AST_m1_sp1_15_rev.tif	20672-21080-11449.tif	3	20	23	no	yes	2	0	27jun18_8jun18_AST_m1_sp1_15_rev.tif	8jun18_AST_m1	AST male	AST	male	Musc	M.musculus	27jun18_8jun18_AST_m1_sp1_15_rev.tif_Batch11
Batch11		27jun18_8jun18_AST_m1_sp1_14.1_rev.tif	25185-16731-15762.tif	3	20	24	yes	yes	2	0	27jun18_8jun18_AST_m1_sp1_14.1_rev.tif	8jun18_AST_m1	AST male	AST	male	Musc	M.musculus	27jun18_8jun18_AST_m1_sp1_14.1_rev.tif_Batch11
Batch11		3jul18_8jun18_AST_m1_sp1_15.1_rev.tif	28279-7341-11247.tif	3	20	24	no	no	1	0	3jul18_8jun18_AST_m1_sp1_15.1_rev.tif	8jun18_AST_m1	AST male	AST	male	Musc	M.musculus	3jul18_8jun18_AST_m1_sp1_15.1_rev.tif_Batch11
Batch11		29aug18_7aug18_AST_m1_sp1_28_rev.tif	26782-21450-5353.tif	3	20	24	no	yes	1	0	29aug18_7aug18_AST_m1_sp1_28_rev.tif	7aug18_AST_m1	AST male	AST	male	Musc	M.musculus	29aug18_7aug18_AST_m1_sp1_28_rev.tif_Batch11
Batch11		29aug18_7aug18_AST_m1_sp1_31.1_rev.tif	29482-19574-17382.tif	3	20	24	no	yes	0	0	29aug18_7aug18_AST_m1_sp1_31.1_rev.tif	7aug18_AST_m1	AST male	AST	male	Musc	M.musculus	29aug18_7aug18_AST_m1_sp1_31.1_rev.tif_Batch11
Batch11		29aug18_7aug18_AST_m1_sp1_24_rev.tif	31248-10749-24829.tif	3	20	24	no	yes	1	0	29aug18_7aug18_AST_m1_sp1_24_rev.tif	7aug18_AST_m1	AST male	AST	male	Musc	M.musculus	29aug18_7aug18_AST_m1_sp1_24_rev.tif_Batch11
Batch11		3jul18_8jun18_AST_m1_sp1_13.1_rev.tif	20680-18090-31553.tif	3	20	25	no	yes	1	0	3jul18_8jun18_AST_m1_sp1_13.1_rev.tif	8jun18_AST_m1	AST male	AST	male	Musc	M.musculus	3jul18_8jun18_AST_m1_sp1_13.1_rev.tif_Batch11
Batch11		3jul18_8jun18_AST_m1_sp1_12.1_rev.tif	25576-29318-6284.tif	3	20	25	no	yes	1	0	3jul18_8jun18_AST_m1_sp1_12.1_rev.tif	8jun18_AST_m1	AST male	AST	male	Musc	M.musculus	3jul18_8jun18_AST_m1_sp1_12.1_rev.tif_Batch11
Batch11		29aug18_7aug18_AST_m1_sp1_14_rev.tif	20516-28935-14469.tif	3	20	26	no	no	1	0	29aug18_7aug18_AST_m1_sp1_14_rev.tif	7aug18_AST_m1	AST male	AST	male	Musc	M.musculus	29aug18_7aug18_AST_m1_sp1_14_rev.tif_Batch11
Batch11		29aug18_7aug18_AST_m1_sp1_10_rev.tif	2191-16552-31040.tif	3	20	27	no	yes	0	0	29aug18_7aug18_AST_m1_sp1_10_rev.tif	7aug18_AST_m1	AST male	AST	male	Musc	M.musculus	29aug18_7aug18_AST_m1_sp1_10_rev.tif_Batch11
Batch11		29aug18_7aug18_AST_m1_sp1_19_rev.tif	17910-3150-3953.tif	3	20	28	no	yes	0	0	29aug18_7aug18_AST_m1_sp1_19_rev.tif	7aug18_AST_m1	AST male	AST	male	Musc	M.musculus	29aug18_7aug18_AST_m1_sp1_19_rev.tif_Batch11
Batch11		27jun18_8jun18_AST_m1_sp1_12_rev.tif	18781-5569-3865.tif	3	20	28	no	yes	0	0	27jun18_8jun18_AST_m1_sp1_12_rev.tif	8jun18_AST_m1	AST male	AST	male	Musc	M.musculus	27jun18_8jun18_AST_m1_sp1_12_rev.tif_Batch11
Batch16		16aug19_27aug18_AST_m1_sp1_27.2_rev.tif	17414-24456-19920.tif	3	20	22	no	yes	2	0	16aug19_27aug18_AST_m1_sp1_27.2_rev.tif	27aug18_AST_m1	AST male	AST	male	Musc	M.musculus	16aug19_27aug18_AST_m1_sp1_27.2_rev.tif_Batch16
Batch16		16aug19_27aug18_AST_m1_sp1_20_rev.tif	13293-28544-4617.tif	3	20	24	no	yes	3	0	16aug19_27aug18_AST_m1_sp1_20_rev.tif	27aug18_AST_m1	AST male	AST	male	Musc	M.musculus	16aug19_27aug18_AST_m1_sp1_20_rev.tif_Batch16
Batch16		16aug19_27aug18_AST_m1_sp1_18_rev.tif	24699-9985-14239.tif	3	20	20	no	yes	1	0	16aug19_27aug18_AST_m1_sp1_18_rev.tif	27aug18_AST_m1	AST male	AST	male	Musc	M.musculus	16aug19_27aug18_AST_m1_sp1_18_rev.tif_Batch16
Batch16		16aug19_27aug18_AST_m1_sp1_16_rev.tif	22893-23551-31099.tif	3	20	23	no	yes	2	0	16aug19_27aug18_AST_m1_sp1_16_rev.tif	27aug18_AST_m1	AST male	AST	male	Musc	M.musculus	16aug19_27aug18_AST_m1_sp1_16_rev.tif_Batch16
Batch11		31aug18_1mar18_CAROLI_m1_sp3_6.1_rev.tif	25058-11841-12366.tif	3	20	20	no	yes	2	0	31aug18_1mar18_CAROLI_m1_sp3_6.1_rev.tif	1mar18_CAROLI_m1	CAROLI male	CAROLI	male	M.caroli	M.caroli	31aug18_1mar18_CAROLI_m1_sp3_6.1_rev.tif_Batch11
Batch11		31aug18_1mar18_CAROLI_m1_sp3_7.1_rev.tif	6316-9092-20354.tif	3	20	22	no	yes	0	0	31aug18_1mar18_CAROLI_m1_sp3_7.1_rev.tif	1mar18_CAROLI_m1	CAROLI male	CAROLI	male	M.caroli	M.caroli	31aug18_1mar18_CAROLI_m1_sp3_7.1_rev.tif_Batch11
Batch11		31aug18_1mar18_CAROLI_m1_sp3_31_rev.tif	9731-19989-16986.tif	3	20	23	no	yes	0	0	31aug18_1mar18_CAROLI_m1_sp3_31_rev.tif	1mar18_CAROLI_m1	CAROLI male	CAROLI	male	M.caroli	M.caroli	31aug18_1mar18_CAROLI_m1_sp3_31_rev.tif_Batch11
Batch11		31aug18_1mar18_CAROLI_m1_sp3_16.3_rev.tif	13548-694-24069.tif	3	20	25	no	yes	0	0	31aug18_1mar18_CAROLI_m1_sp3_16.3_rev.tif	1mar18_CAROLI_m1	CAROLI male	CAROLI	male	M.caroli	M.caroli	31aug18_1mar18_CAROLI_m1_sp3_16.3_rev.tif_Batch11
Batch11		31aug18_1mar18_CAROLI_m1_sp3_7.2_rev.tif	16814-13733-13178.tif	3	20	25	no	yes	0	0	31aug18_1mar18_CAROLI_m1_sp3_7.2_rev.tif	1mar18_CAROLI_m1	CAROLI male	CAROLI	male	M.caroli	M.caroli	31aug18_1mar18_CAROLI_m1_sp3_7.2_rev.tif_Batch11
Batch11		31aug18_1mar18_CAROLI_m1_sp3_2.1_rev.tif	22915-230-32599.tif	3	20	25	no	yes	0	0	31aug18_1mar18_CAROLI_m1_sp3_2.1_rev.tif	1mar18_CAROLI_m1	CAROLI male	CAROLI	male	M.caroli	M.caroli	31aug18_1mar18_CAROLI_m1_sp3_2.1_rev.tif_Batch11
Batch18		12sep19_9apr18_CAROLI_m1_sp2_10.3_rev.tif	25805-5261-21960.tif	3	20	28	no	yes	0	0	12sep19_9apr18_CAROLI_m1_sp2_10.3_rev.tif	9apr18_CAROLI_m1	CAROLI male	CAROLI	male	M.caroli	M.caroli	12sep19_9apr18_CAROLI_m1_sp2_10.3_rev.tif_Batch18
Batch18		12sep19_9apr18_CAROLI_m1_sp2_13.1_rev.tif	3865-14159-12351.tif	3	20	30	no	yes	0	0	12sep19_9apr18_CAROLI_m1_sp2_13.1_rev.tif	9apr18_CAROLI_m1	CAROLI male	CAROLI	male	M.caroli	M.caroli	12sep19_9apr18_CAROLI_m1_sp2_13.1_rev.tif_Batch18
Batch18		12sep19_9apr18_CAROLI_m1_sp2_15_rev.tif	15618-21851-11702.tif	3	20	32	no	yes	0	0	12sep19_9apr18_CAROLI_m1_sp2_15_rev.tif	9apr18_CAROLI_m1	CAROLI male	CAROLI	male	M.caroli	M.caroli	12sep19_9apr18_CAROLI_m1_sp2_15_rev.tif_Batch18
Batch18		12sep19_9apr18_CAROLI_m1_sp2_16.1_rev.tif	23329-8029-23903.tif	3	20	26	no	yes	0	0	12sep19_9apr18_CAROLI_m1_sp2_16.1_rev.tif	9apr18_CAROLI_m1	CAROLI male	CAROLI	male	M.caroli	M.caroli	12sep19_9apr18_CAROLI_m1_sp2_16.1_rev.tif_Batch18
Batch18		12sep19_9apr18_CAROLI_m1_sp2_17.1_rev.tif	28277-9520-4828.tif	3	20	30	no	yes	0	0	12sep19_9apr18_CAROLI_m1_sp2_17.1_rev.tif	9apr18_CAROLI_m1	CAROLI male	CAROLI	male	M.caroli	M.caroli	12sep19_9apr18_CAROLI_m1_sp2_17.1_rev.tif_Batch18
[truncated: 2,869 more rows]
